# Supplementary material for: Plastome phylogenomics and characterization of rare genomic changes as taxonomic markers in plastome groups 1 and 2 Poeae (Pooideae; Poaceae)
Source: PeerJ journal article supplement (doi:10.7717/peerj.6959), 2019-06-03
Supplement: OrtonEtAl_Poeae_Supplemental_Figures.pdf [file OrtonEtAl_Poeae_Supplemental_Figures.pdf]

SI Figure 1. Majority Consensus Tree for BI Combined Sequence and RGC for Groups 1 & 2.

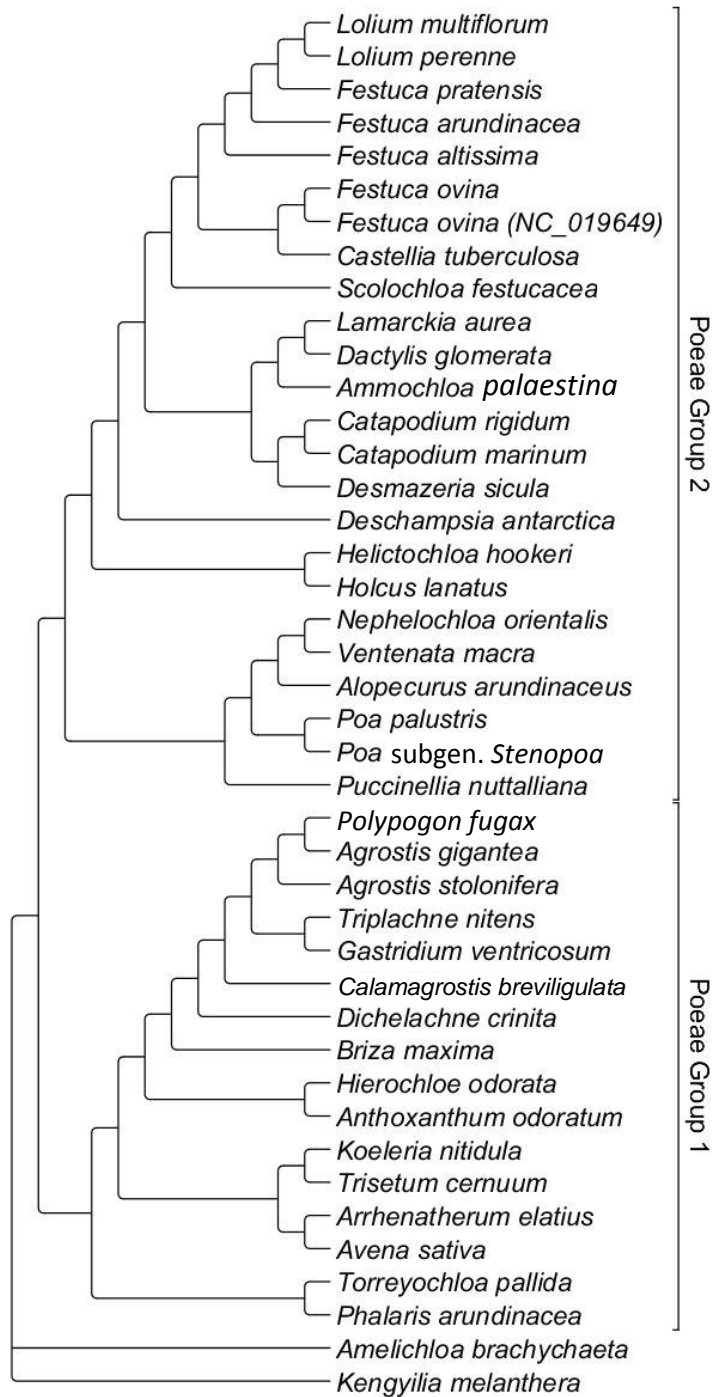

SI Fig. 1. BI combined sequence and RGC data sets of both group 1 and group 2 species produced topologies consistent with sequence only analyses and topologies of previous studies. All nodes at maximum support.

Supplemental Information

SI Figure 2. Majority Consensus Tree for BI Sequence Analysis Group 1 only.

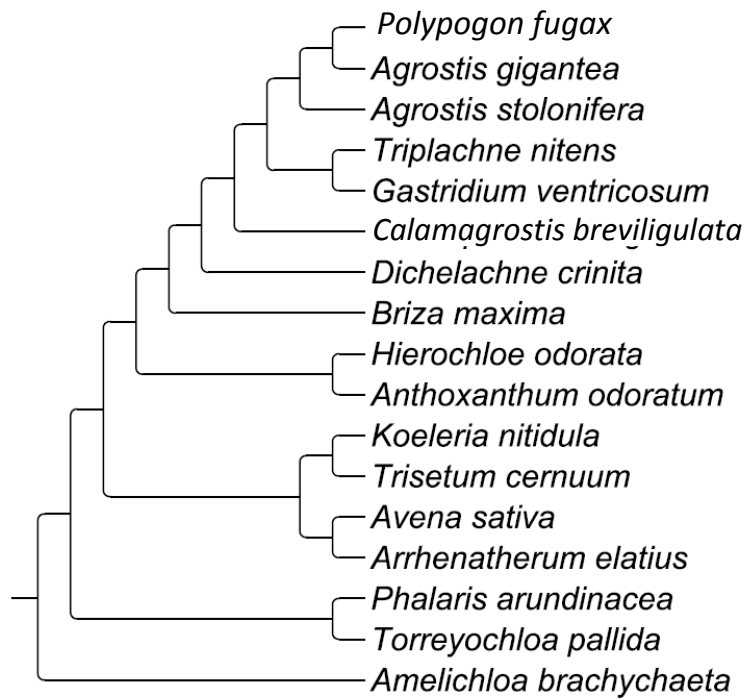

SI Fig. 2. BI sequence only data set of group 1 species produced topologies consistent with sequence and RGC analyses and topologies of previous studies. All nodes at maximum support.

SI Figure 3. Majority Consensus Tree for BI Sequence Analysis for Group 2 only.

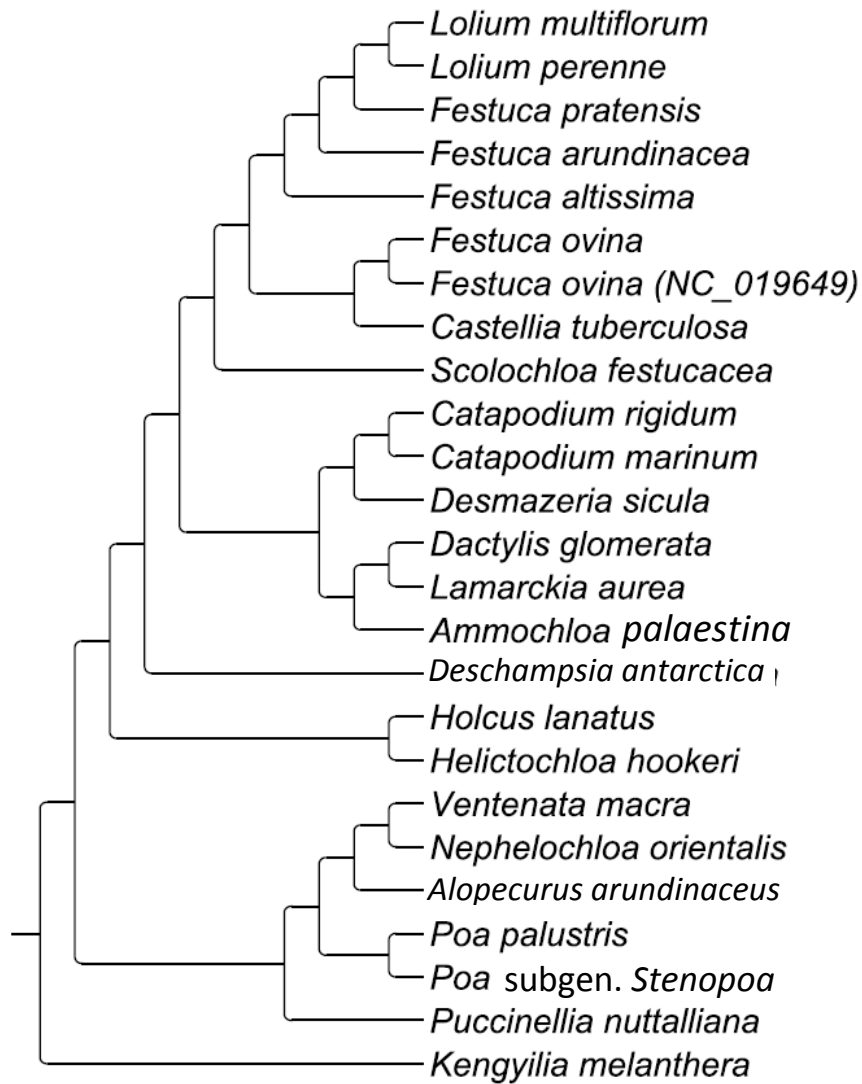

SI Fig. 3. BI sequence only data set of group 2 species produced topologies consistent with sequence and RGC analyses and topologies of previous studies. All nodes at maximum support.
