# Supplementary material for: Plastome phylogenomics and characterization of rare genomic changes as taxonomic markers in plastome groups 1 and 2 Poeae (Pooideae; Poaceae)
Source: PubMed Central journal article supplement (PMC6553444; doi:10.7717/peerj.6959), 2019-06-03
Supplement: peerj-07-6959-s002.pdf [file peerj-07-6959-s002.pdf]

**SI Table 1. Additional data describing ML and BI analyses conducted.**

|                 |           | Mean support |                                      |            |
|-----------------|-----------|--------------|--------------------------------------|------------|
|                 |           | value        | Std. Dev. bs(ML)   stdev. splfr (BI) | -lnL       |
| <b>ML</b>       |           |              |                                      |            |
| <i>Sequence</i> |           |              |                                      |            |
|                 | G1        | 99.07        | 0.84                                 | -223665.52 |
|                 | G2        | 98.36        | 0.16                                 | -269023.15 |
|                 | G1+G2     | 99.10        | 1.72                                 | -290961.06 |
| <i>Combined</i> |           |              |                                      |            |
|                 | G1+RGC    | 99.07        | 0.82                                 | -223882.83 |
|                 | G2+RGC    | 98.40        | 0.27                                 | -269358.13 |
|                 | G1+G2+RGC | 91.88        | 1.79                                 | -291612.57 |
| <b>BI</b>       |           |              |                                      |            |
| <i>Sequence</i> |           |              |                                      |            |
|                 | G1        | 1.0          | 0.010476                             | -227764.13 |
|                 | G2        | 1.0          | 0.012298                             | -275775.33 |
|                 | G1+G2     | 0.99         | 0.002266                             | -302944.15 |
| <i>Combined</i> |           |              |                                      |            |
|                 | G1+RGC    | 0.97         | 0.007857                             | -230513.31 |
|                 | G2+RGC    | 1.0          | 0.00739                              | -276119.53 |
|                 | G1+G2+RGC | 1.0          | 0.011224                             | -303590.55 |

---

SI.T.1 Data describing ML and BI analyses and resulting phylogenomic trees.

G1 = Group 1; G2 = Group 2; RGC = Rare Genomic Changes.
