# Supplementary material for: Plastome phylogenomics and characterization of rare genomic changes as taxonomic markers in plastome groups 1 and 2 Poeae (Pooideae; Poaceae)
Source: PeerJ. 2019 Jun 3;7:e6959. doi: 10.7717/peerj.6959 (PMC6553444; doi:10.7717/peerj.6959)
Supplement: Table S2 — Excel file containing RGC identifications, binary matricies, and taxonomic markers. See the “Read-Me” tab for instructions on navigating these data. [file peerj-07-6959-s003.xlsx]

## Sheet: READ-ME
Interpreting the data presented in this supplemental table:
1) Sheets are named corresponding to the Poeae groups analyzed (G1= Group 1, G2= Group2, G1&G2= both groups).
2) RGC binary data is contained in sheets bearing the "BINARY" designation. All other Poeae groups (G1, G2) contain RGC sequence identifications.
3) The "Taxonomic Markers" sheet contains data relating to those RGC determined to be clade defining. Specific Letter-Number codes relating to Group 1 (ex: A1) or Group 2 (ex: A2) are listed along with RGC sequence data.
4) Species color coding (G1=blue, G2=yellow, outgroup=green) (red=discard)

## Sheet: G1&G2
Species (G1=blue, G2=yellow, outgroup=green)	No.	start	end	length (total)
Amelichloa_brachychaeta	1	8611	8680	(70) 57	GAATG---------------------------------------------------------AAACATAG
Kengyilia_melanthera					GAATG---------------------------------------------------------AAACATAG
Triplachne_nitens					GAATG---------------------------------------------------------AAACATAG
Polypogon _fugax					GAATT---------------------------------------------------------AAACATAA
Koeleria_nitidula					GAATG---------------------------------------------------------AAACATAG
Dichelachne_crinita					GAATG---------------------------------------------------------AAACATAG
Gastridium_ventricosum					GAATG---------------------------------------------------------AAACATAG
Agrostis_gigantea					GAATG---------------------------------------------------------AAACATAA
Agrostis_stolonifera					GAATG---------------------------------------------------------AAACATAG
Arrhenatherum_elatius					GAGTG---------------------------------------------------------AAACATAG
Avena_sativa				insert	GAATGAGAATGAAACATAGTTCGAAAAACATATGAATG------------------------AAACATAG
Calamagrostis_breviligulata					GAATG---------------------------------------------------------AAACATAG
Hierochloe_odorata					GAATG---------------------------------------------------------AAACATAG
Trisetum_cernuum					GAATG---------------------------------------------------------AAACATAG
Anthoxanthum_odoratum					GAATG---------------------------------------------------------AAACATAG
Torreyochloa_pallida					GAATG---------------------------------------------------------AAACATAG
Phalaris_arundinacea					GAATG---------------------------------------------------------AAACATAG
Briza_maxima				insert	GAATG------AAACATAGTTCGAAAAAGT---GAATGAAACATAGTTCGAAAAAGTGAATGAAACATAG
Helictochloa_hookeri					GAATG---------------------------------------------------------AAACATAG
Poa_palustrus					GAATG---------------------------------------------------------AAACATAG
Alopecurus_arundinaceus					GAATG---------------------------------------------------------AAACATAG
Nephelochloa_orientalis					GAATA---------------------------------------------------------AAACATAG
Ventenata_macra				insert	GAATG------AAACATAGTTCGAAAAAGA------------CTACT---------------AAACA-AG
Poa_subgen_Stenopoa					GAATG---------------------------------------------------------AAACATAG
Festuca_ovina					GAATG---------------------------------------------------------AAACATAG
Festuca_ovina_NC_019649					GAATG---------------------------------------------------------AAACATAG
Castellia_tuberculosa					GAATC---------------------------------------------------------AAACATAG
Holcus_lanatus					GAATG---------------------------------------------------------AAACATAG
Scolochloa_festucaceae					GAATG---------------------------------------------------------AAACATAG
Festuca_altissima					GAATG---------------------------------------------------------AAACATAG
Festuca_arundinacea					GAATG---------------------------------------------------------AAACGTAG
Festuca_pratensis					GAATG---------------------------------------------------------AAACATAG
Lolium_multiflorum					GAATG---------------------------------------------------------AAACATAG
Lolium_perenne					GAATG---------------------------------------------------------AAACATAG
Deschampsia_antarctica					GAATG---------------------------------------------------------AAACATAG
Puccinellia_nuttalliana					GAATG---------------------------------------------------------AAACATAG
Ammochloa_palestina					GAATG---------------------------------------------------------AAACATAG
Lamarckia_aurea					GAATG---------------------------------------------------------AAACATAG
Dactylis_glomerata					GAATG---------------------------------------------------------AAACATAG
Catapodium_rigidum					GAATG---------------------------------------------------------AAACATAG
Catapodium_marinum					GAATG---------------------------------------------------------AAACATAG
Desmazeria_sicula					GAATG---------------------------------------------------------AAACATAG
Amelichloa_brachychaeta	2	24895	25060	(166) 151	G--------A------AGGAAATTTGCTCTGAT--------ATAGAGTATAACCTGACCGTCTTGGCCCACCC--------------AAGTGAAATTATGAT-----AAAAGCAGAAATATGTGGAGAGGTGGATAACTAGATTGGCATGT--------ACTTAAA
Kengyilia_melanthera					GAATAAAAAA------AGGAAATTTGCTCTGAT--------ATAGAGTATAATCTGACTATCTTGGCCTACCC--------------AAGTGAAATTACGATAAAAGAAAAGCATGGATATGGGGAGAGGTGGATAACTAGATTGGCATGT--------ACTTAAA
Triplachne_nitens					GAATA--AAAAA-AA-AGGAAATTTG-------CTCTGATA-TAGAGTATAACCTGACTAT-----CTTAGCCTATCCAACT----GAAATTA-----CGATAAAATAAAAGCATGGATATGTGGAGAGGTGGATAACTAGATTGGCATGTACTT--------AAA
Polypogon _fugax					GAAT--AAAAAA-AA-GGGAAATTTG-------CTCTGATA-TAGAGTATAACCTGACTAT-----CTTAGCTTATCCAAGT----GAAATTA-----TGATAAAAGAAAAGCATGGATATGTGGAGAGGTGGATAACTAGATTGGCATGTACTT--------AAA
Koeleria_nitidula					GAAT---AAAAA-TA-GGGAAATTTG-------CTCTGATA-TAGAGTATAACCTGACTAT-----CTTAGCCTATCCAAGT----GAAATTA-----CGATAAAAGAAAAGCATGGATATGTGTAGAGGTCGATAACTAGATTGGCATATACTT--------AAA
Dichelachne_crinita					GAAT--AAAAAA-AA-AGGAAATTTG-------CTCTGATA-TAGAGTAGAACCTGACTAT-----CTTAGCCTATCCAAGT----GAAATTG-----CGATAAAAGAAAAGCATGGATATGTGGAGAGGTGGATAACTAGATTGGCATGTACTT--------AAA
Gastridium_ventricosum					GAATAAAAAAAA-AA-AGGAAATTTG-------CTCTGATA-TAGAGTATAACCTGACTAT-----CTTAGCCTATCCAACT----GAAATTA-----CGATAAAAGAAAAGCATGGATATGTCGAGAGGTGGATAACTAGATTGGCATGTACTT--------AAA
Agrostis_gigantea					GAAT--AAAAAA-AA-GGGAAATTTG-------CTCTGATA-TAGAGTATAACCTGACTAT-----CTTAGCTTATCCAAGT----GAAATTA-----TGATAAAAGAAAAGCATGGATATGTGGAGAGGTGGATAACTAGATTGGCATGTACTT--------AAA
Agrostis_stolonifera					GAAT--AAAAAA-AA-AGGAAATTTG-------CTCTGATA-TAGAGTATAACCTGACTAT-----CTTAGCCTATCCAAGT----GAAATTA-----TGATAAAAGAAAAGCATGAATATGTGGAGAGGTGGATAACTAGATTGGCATGTACTT--------AAA
Arrhenatherum_elatius					GAAT----AAAA-AA-GGGAAATTTG-------CTCTGATA-TAGAGTATA----GACTAT-----CTTAGCCTATCCAAGT----GAAATTA-----CGATAAAAGAAAAGCATGGATATGTGTAGAGGTCAATAACTAGATTGGCATATACTT--------AAA
Avena_sativa				deletion	GAA-------------------------------------------------------------------------------------------------------------------------------------------------------T--------AAA
Calamagrostis_breviligulata					GAATA-AAAAAA-AA-AAGAAATTTG-------CTCTGATA-TAGAGTATAACCTGACTAT-----CTTAGCCTATCCAAGT----GAAATTA-----CGATAAAAGAAAAGCATGGATATGTGGAGAGGTGGATAACTAGATTGGCATGTACTT--------AAA
Hierochloe_odorata					GAAT---AAAAA-AA-AGGCAATTTG-------CTCTGATA-TAGAGTATAACCTGACTAT-----CTTAGACTATCCAAGT----GAAATTA-----CGATAAAAGAAAAGCATGGATATGTGGAGAGGTGGATAACTAGATTGGCATGTACTT--------AAA
Trisetum_cernuum				deletion	GAA-------------------------------------------------------------------------------------------------------------------------------------------------------T--------AAA
Anthoxanthum_odoratum					GAATAAAAAAAAGAA-AGGCAATTTG-------CTTTGATA-TAGAGTATAACCTGACTAT-----CTTAGCCTATCCAAGT----GAAA--------------------------------TGGAGAGGTGGATAACTAAATTGGCATGTACTT--------AAA
Torreyochloa_pallida					GAAT--AAAAAA-AA-AGGAAATTTG-------CTCTGATA-TAGAGTATAACCTGACTCT-----CTTAGCCTATCCAAGT----GAAATTA-----CGATAAAAGAAAAGCATGGATATGTGGAGAGGTGGATAACTAGATTGGCATGTACTT--------AAA
Phalaris_arundinacea					GAAT---AAAAA-AA-AGGAAATTTG-------CTCTGATA-TAGAGTATAACCTGACTAT-----CTTAGCCTATCCAAGT----GAAATTA-----CGATAAAAGAAAAGC-TGGATATGTGGAGAGGTGGATAACTAGATTGGCATGTACTT--------AAA
Briza_maxima					GAAT---AAAAAAAA-AAGAAATTTG-------CTCTGATA-TAGAGTATAACCTGACTAT-----CTTAGCCTGTCCAAGT----GAAATTAAATTCCGATAAAAGAAAAGCATGGATATGTGGAGAGGTGGATAACTAGATTGGCATGTACTT--------AAA
Helictochloa_hookeri					GAATAAAAAAAAA---AAGAAATTTG-------CTCTGATATTAGAGTTTAACCTGACTAT-----CTTGCCCTGTCCAAGT----GAAATTA-----CGATAAAAGAAAAGCATGGGTATGTGGAGAGGTAGATAACTAGATTGGCATGTACTT--------AAA
Poa_palustrus					GAAT-AAAAAAA----AGGAAATTTG-------ATATGATA-TGGAGTATAACCTGACTAT-----CTTGGCCTGTCCAAGT----CAAATTA-----CAATAAAAGAAAAGCATGGATATGTGGAGAGGTAGATAACTAGATTGGCATGTACTTA-------AAA
Alopecurus_arundinaceus					GAAT-AAAAAAA----AAGGAAATTTG------ATCTGATA-TAGAGTATAACCTGACTAT-----CTTGGCCTGTCCAAGT----GACATTA-----CGAAAAAAGAAAAGCATGGATATGTGGAGAGGCAGATAACTAGATTGGCATGTACTT--------AAA
Nephelochloa_orientalis					GAAT-AAAAAAA----AAGAAATTTGATCTGATATCTGATA-TAGAGTATAACCTGACTAT-----CTTGGCCTGTCCAAGT----GAAATTA-----CGATAAAAGAAAAGCATGGATATGCGGAGAGGTAGATAACTAGATTGGCATGTACTT--------AAA
Ventenata_macra					GAATAAAAAAAA----AAGAAATTTGATCTGATATCTGATA-TAGAGTATAACCTGACTAT-----CTTGGCCTGTCCAAGT----GAAATTA-----CGATAAAAGAAAATCATGGATATGTGGAGAGGTAGATAACTAGATTGGCATGTACTT--------AAA
Poa_subgen_Stenopoa					GAAT-AAAAAAA----AGGAAATTTG-------ATATGATA-TGGAGTATAACCTGACTAT-----CTTGGCCTGTCCAAGT----CAAATTA-----CAATAAAAGAAAAGCATGGATATGTGGAGAGGTAGATAACTAGATTGGCATGTACTTA-------AAA
Festuca_ovina					GAATAAAAAAA-----AGGAAATTTG-------CTCTGATA-TAGAGTATAACCTGACTAT-----CTTGGTCTGTCCAAGT----GAAATTA-----CGATAAAAGAAAAGTATGGGTATGTGGAGAGGTAGATAACTAGATTGGCATGTACTT--------CAA
Festuca_ovina_NC_019649					GAATAAAAAAA-----AGGAAATTTG-------CTCTGATA-TAGAGTATAACCTGACTAT-----CTTGGTCTGTCCAAGT----GAAATTA-----CGATAAAAGAAAAGTATGGGTATGTGGAGAGGTAGATAACTAGATTGGCATGTACTT--------CAA
Castellia_tuberculosa					GAATAAAAAAA-----AGGAAATTTG-------CTCTGATA-TAGAGTATAACCTGACTAT-----CTTGGTCTGTCCAAGT----GAAATTA-----CGATAAAAGAAAAGCATGGGTATGTGGAGAGGTAGATAACTAGATTGGCATGTACTT--------AAA
Holcus_lanatus					GAATAAAAAAAAGGAGAGGAAATTTG-------CTCTGATA-TAGAGTATAACCCGACTAT-----CTTGACCTGCCCAAGT----TAAATTA-----CGATAAAAGAAAAGCATGGGTATGTGGAGAGGTAGATAACTAGATTGGCATGTACTT--------AAA
Scolochloa_festucaceae					GAAT-AAAAAAA----AGGAAATTTG-------CTCTGATA-TAGAGTATAACCTGACTAT-----CTTGGTCTGTCCAAGT----GAAATTA-----CGATAAAAGAAAAGCATGGGTATGTGGCGAGGTAGATAACTAGATTGGCATGTACTT--------AAA
Festuca_altissima					GAATAAAAAAAA----AGGAAATTTG-------CTCTGATA-TAGAGTATAACCTGACTAT-----CTTGGTCTGTCCAAGT----GAAATTA-----CGATAAAAGAAAAGCATGGGTATGTGGAGAGGTAGATAACTAGATTGGCATGTACTT--------AAA
Festuca_arundinacea					GAATAAAAAAAA----AGGAAATTTG-------CTCTGATA-TAGAGTATAACCTGACTAT-----CTTGGTCTGTCCAAGTGAAAGAAATTA-----CGATAAAAGAAAAGCATGGCTATGTGGAGAGGTAGATAACTAGATTGGCATGTACTT--------AAA
Festuca_pratensis					GAAT-AAAAAAA----AGGAAATTTG-------CTCTGATA-TAGAGTATAACCTGACTAT-----CTTGGTCTGTCCAAGTGAAAGAAATTA-----CGATAAAAGAAAAGCATGGCTATGTGGAGAGGTAGATAACTAGATTGGCATGTACTT--------AAA
Lolium_multiflorum					GAATAAAAAAAA----AGGAAATTTG-------CTCTGATA-TAGAGTATAACCTGACTAT-----CTTGGTCTGTCCAAGTGAAAGAAATTA-----CGATAAAAGAAAAGCATGGCTATGTGGAGAGGTAGATAACTAGATTGGCATGTACTT--------AAA
Lolium_perenne					GAATAAAAAAAA----AGGAAATTTG-------CTCTGATA-TAGAGTATAACCTGACTAT-----CTTGGTCTGTCCAAGTGAAAGAAATTA-----CGATAAAAGAAAAGCATGGCTATGTGGAGAGGTAGATAACTAGATTGGCATGTACTT--------AAA
Deschampsia_antarctica					GAAT-AAAAAAA----AGTCAATTTG-------CTCTGATA-TAGAGTATAACCTGGCTATCTTGGCTTGGCCTGTCCAAGT----GAAATTA-----CGATAAAAGAAAAGCATGGGTATGTGGAGAGGTGGATAACTAGATTAGCATGTACTT--------AAA
Puccinellia_nuttalliana					GAATAAAAAA------AGGAAATTTG-------ATCTGATA-TAGAGTATAACCTGACTAT-----CTTAGCCTGTCCAAGT----GAAATTA-----CGATAAAAGAAAAGCATGGATATGTGGAGAGGTAGATAAGTAGATTGCCATGTACTT--------AAA
Ammochloa_palestina					GAATAAAAAAA-----AGGAAATTTGCTCTGA-TTCTGATA-TAGAGTATAACCTGACTAT-----CTTGGCCTGTCCAAAT----GAAATTG-----CGATAAAAGAAAAGCATGGGTATGCGGAGAGGTAGATAACTAGATTGGCATGTACTT--------AAA
Lamarckia_aurea					GAAT-AAAAAA-----AGGAAATTTGCTCTGA-TTCTGCTA-TAGAGTATAACCTGACTAT-----CTTGGCCTGTCCAAAA----GAAATTA-----CGATAAAAGAAAAGCGTGGGTATGTGGAGAGGTAGATAACTAGATTGGCATGTACTT--------AAA
Dactylis_glomerata					GAAT-AAAAAA-----AGGAAATTTGCTCTGA-TTCTGCTA-TAGAGTATAACCTGACTAT-----CTTGGCCTGTCCAAAT----GAAATTA-----CGATAAAAGAAAAGCATGGGTATGTGGAGAGGTAGATAACTAGATTGGCATGTACTT--------AAA
Catapodium_rigidum					GAATAAAAAAAA----AGGAAATTCG-------TTCTGATA-TAGAGTATAACCTGACTAA-----CTTAGCCTGTACAAGT----GAAATTA-----TGATAAAAGAAAAACATGGGTATGTGGAGAGGTAGATAACTAGATTGGCCTGTACTTAAAAACTTAAA
Catapodium_marinum					GAATAAAAAAAA----AGGAAATTCG-------TTCTGATA-TAGAGTATAACCTGACTAA-----CTTAGCCTGTACAAGT----GAAATTA-----TGATAAAAGAAAAACATGGGTATGTGGAGAGGTAGATAACTAGATTGGCCTGTACTTAAAAACTTAAA
Desmazeria_sicula				deletion	GAA-------------------------------------------------------------------------------------------------------------------------------------------------------TA-------AAA
Amelichloa_brachychaeta	3	73653	73902	(250) 239	TTTCTTTTTTTTTTTAAGGGCCCCTC----GGGGGGTCGTGGAATGCTTTTCTTCTCCTCTTATTCCATATGGAATAGAAT-------------------------------------------CAGTTAAAATAAGAAGAAATAGGG----------------GAATATTCTACCGTTCACTCCAAAAAGAGGCTTAAATGCTATTGAAAAAGAAATAATCCAAAATAGAA--ATAA-CCTTTTTTTTT
Kengyilia_melanthera					1---------------AACAGCCCCTT----GGGAGGTCGTGGAATGCTTTTCTTCTCCTCTTATTCCATATGGAATACAAC-------------------------------------------CAGTTAAAATAAGAAGGAATAGGG----------------GAATATTCGATCGTTCACTTCAAAAAGAGG-----GTCCTATTGAAAAAGAAATTATCCAAAATAGAA--AGAAGTTTTTTTTTTT
Triplachne_nitens					TTTTCTTTTTTTTTAAGGGTCCCTC----GGGGGGGTCGTGGAATGCTTTTCTTCTCCTCTTATCCCGTATGGAATACAAT---------------AAGTGAAAATAAGACAGTT--------------AAAATAAG--------AAGTGAATAGTGG-------AATATTTGATCATTCACTGCAAAAAGAAGG-----TCGTATTGAAAAAGAAATAATCCAAAATTCAATTGTTTA-TTTTTTTTTG
Polypogon _fugax					TTTTC--TTTTTTTTAAGGTCCCTCGGGGGGGGGGGTCGTGGAATGCTTTTCTTCTCCTCTTATTCCATATGGAATACAAT---------------AAGTTAAAATAAGACAGTT--------------AAAATAAG--------AAGTGAATAGTGG-------AATATTTGACCGTTCACTGCAAAAAGAAGG-----TCCTATTGAAAAAGAAATAA------------------------------
Koeleria_nitidula					CTTTA--TTTTTTTAAGGGGCCCTC----GGGGGGGTCGTGGAATGCTTTTCTTCTCCTCTTATTCCATATGGAATACAAT---------------TAGTTAAAATAAGACAGTT--------------AAAATAAG--------AAG-GAATAGTGG-------AATATTTGACCGTTCACTCCAAAAAGAGGG-----TCATATTGAAAAAGAAATAATCCAAAATAGAA--AACA-TTTTTTTTTTT
Dichelachne_crinita					TTTTA-TTTTTTTTAAGGGTCCCTCGGGGGGGGGGGTCGTGGAATGCTTTTCTTCTCCTCTTATTCCATATGGAATACAAT---------------AAGTTAAAATAAGACAGTT--------------AAAATAAG--------AAG-GAATAGTGG-------AATATTTGACCGTTCACTGCAAAAAGAAGG-----TCCTATTGAAAAAGAAATAATCCAAAATAGAA---AGCATTTTTTTTTTT
Gastridium_ventricosum					TTTTCTTTTTTTTTAAGGGTCCCTC---GGGGGGGGTCGTGGAATGCTTTTCTTCTCCTCTTATCCCGTATGGAATACAAT---------------AAGTTAAAATAAGACAGTT--------------AAAATAAG--------AAGTGAATAGTGG-------AATATTTGACCGTTCACTGCAAAAAGAAGG-----TCGTATTGAAAAAGAAATAATCCAAAATTCAATTGTTTA-TTTTTTTTTG
Agrostis_gigantea					TTTTC--TTTTTTTTAAGGTCCCTCGGGGGGGGGGGTCGTGGAATGCTTTTCTTCTCCTCTTATTCCATATGGAATACAAT---------------AAGTTAAAATAAGACAGTT--------------AAAATAAG--------AAGTGAATAGTGG-------AATATTTGACCGTTCACTGCAAAAAGAAGG-----TCCTATTGAAAAAGAAATAATCCAAAATTCAA------------------
Agrostis_stolonifera					TTTTC--TTTTTTTTAAGGTCCCTC--GGGGGGGGGTCGCGGAATGCTTTTCTTCTCCTCTTATTCCATATGGAATACAAT---------------AAGTTAAAATAAGACAGTT--------------AAAATAAG--------AAGTGAATAGTGG-------AATATTTGACCGTTCACTCCAAAAAGAAGG-----TCCTATTGAAAAAGAAATAATCCAAAATTCAA------------------
Arrhenatherum_elatius					CTTTA-TTTTTTTTAAGAGGGCCTC----GGGGGGGTCGTGGAATGCTTTTCTTCTCCTCTTATTCCATATGGAATACAAT---------------TAGTTAAAATAAGACAGTT--------------AAAATAAG--------AAG-GAATAGTGG-------AATATTTGACCATTCACTCCAAAAAGAGGG-----TCCTGTTGAAAAAGAAAGAATCCAAAATAGAA-------AACATTTTTTT
Avena_sativa					CTTTA-TTTTTTTTAAGGGGCCCTC---AGGGGGGGTCCTGGAATGCTTTTCTTCTCCTCTTATTCCATATGGAATACAAT---------------TAGTTAAAATAAGACAGTT--------------AAAATAAGAAGGAATAAAG-GAATAGTGG-------AATATTTGACCGTTCACTCCAAAAAGAGGG-----TCCTATTGAAAAAGAAATAATCCAAAATACAA--AACATTTTTTTTTTTT
Calamagrostis_breviligulata					TTTTC-TTTTTTTTAAGGGTCCCTC----GGGGGGGTCGTGGAATGCTTTTCTTCTCCTCTTATTCCATATGGAATACAAT---------------AAGTTAAAATAAGACAGTT--------------AAAATAAG--------AAG-GAATAGTGG-------AATATTTGACCGTTCACTGCAAAAAGAAGG-----TCCTATTGAAAAAGAAATAATCCAAAATTCAATTGTTTATTTTTTTTTTT
Hierochloe_odorata					TT-----TTTTTTTCAAATTCAATTGTTTGGGGGGGTCGTGGAATGCTTTTCTTCTCCTCTTATTCCATATGGAATACAAT---------------AAGTTAAAATAAGACAGTT--------------AAAATAAG--------AAG-GAATAATGG-------AATATTTGACCGTTCACTCCAAAAAGAAGG-----TCCTATTGAAAAAGAAATAATCCAAAATAGAA--AGCATTTTTTTTTTTT
Trisetum_cernuum					CTT----TTTTTTTAAGGGGCCCTC----GGGGGGGTCGTGGAATGCTTTTCTTCTCCTCTTATTCCATATGGAATACAAT---------------TAGTTAAAATAAGACAGTT--------------AAAATAAG--------AAG-GAATAGTGG-------AATATTTGACCGTTCACTCCAAAAAGAGGG-----TCCTATTGAAAAAGAAATAATCCAAAATAGAA--AACA-TTTTTTTTTTT
Anthoxanthum_odoratum				deletion	TTTTT------------------------------------------------------------------------------------------------------------------------------------------------------------------------------------------------------------------------------------------------TTTTT
Torreyochloa_pallida					CTTTC-TTTTTTTTAAAGGTCATTT------------------------------TTTTTTTTTTTCAAATGCAA-------------------------------------------------------------------------------------------------------------------------------------------------------------------------------
Phalaris_arundinacea					CTTTCTTTTTTTTTAAGGGTCCCTCGGGGGGGGGGGTCGTGGAATGCTTTTCTTCTCCTCTTATTCCATATGGAATACAAT---------------CAGTTAAAATAAGACAGTT--------------AAAATAAG--------AAG-GAATAGTGG-------AATATTTGACCGTTCACTCCAAAAAGAGGG-----TCCTATTGAAAAAGAAATAATCCAAAATAGAA----AGCATTTTTTTTTT
Briza_maxima					----------------------------------------------------------------------------------------------------------------------------------------------------------------------------------------------------------------------------------------------------------
Helictochloa_hookeri					CTTTCTTTTTTTTTTAAGGGTCCCCAGGG-----GGTCGTGGAATGCTTTTCTTCTCCTCTTATTCCATATGGAATACAAC---------------CAGTTAAAATAAGACAGTT--------------AAAATAAG--------AAG-GAATAGGGGAATATTTGATATTTGACCGTTCACTCCAAAAAAAAAGG---GTCCTATTGAAAAAGAAATAATCCAAAATAGAA--AGAAG---TTTTTTTT
Poa_palustrus					CTTTTTTTT-TTTTTTAGGGTCCCTCAGGG----GGTCGTGGAATGCTTTTTTTCTTCTCTTATTCCATATGGAATACAAC---------------CAGTT----------------------------AAAATAAG--------AAA-GAATAGGGG-------AATATTTCACTGTTCACTCTAAAAAGAGGGT---CTCCTATTGAAAAAGAAATAATACAAAATAGAA--AGAA-TTTTTTTTTT-
Alopecurus_arundinaceus					1-CTTTTT----TTTTAAGGGTCCCTCAGGG----GGTTGTGGAATGCTTTTCTTCTACTCTTATTCCATATGGAATACAAC---------------CAGTT----------------------------AAAATAAG--------AAG-GAATAGGGG-------AATATTTCACCGTTCACTCCAAAAAGAGGG-----TCCTATTGAAAAAGAAATAATACAAAATAGAA--AGAAGTTTTTTTTTTT
Nephelochloa_orientalis					CCTTTTT----TTTTAAGGGTCCCTCACGG----GGTCGTGGAATGCTTTTCTTCTCCTCTTATTCCATATGGAATACAAC---------------CAGTT----------------------------AAAATAAG--------AAG-GAATAGGGG-------AATATTTCACCGTTCACTCCAAAAAGAGGG-----TCCTATTGAAAAAGAAATAATACAAAATAGAA--AGAAGTTTTTTTTTC-
Ventenata_macra					CCTT-------------------------------------------------------------------------------------------------------------------------------------------------------------------------------------------------------------------------------------------TTTTTTTTTC-
Poa_subgen_Stenopoa					CTTTTTTTT--TTTTTAGGGTCCCTCAGGG----GGTCGTGGAATGCTTTTTTTCTTCTCTTATTCCATATGGAATACAAT---------------CAGTT----------------------------AAAATAAG--------AAG-GAATAGGGG-------AATATTTCACTGTTCACTCTAAAAAGAGGGT---CTCCTATTGAAAAAGAAATAATACAAAATAGAA--AGAATTTTTTTTTTT-
Festuca_ovina					TTCTTTTTT-TTTTTAAGGGTCCCCTGGGG----GGTCGTGGAATGCTTTTCTTCTCCTCTTATTCCATATGGAGTACAAC---------------CAGCTAAAATAAGATAAGACAGTT---------AAAATAAG--------AAG-GAATAGGGG-------AATATTTGACCGTTCGCTCCAAAAAGAGGG-----TCCTATTGAAAAAGAAATAATCCAAAATAGAA--AGAAGTTTTTTTTTTT
Festuca_ovina_NC_019649					TTC---TTT-TTTTTAAGGGTCCCCTGGGG----GGTCGTGGAATGCTTTTCTTCTCCTCTTATTCCATATGGAGTACAAC---------------CAGCTAAA-----ATAAGACAGTT---------AAAATAAG--------AAG-GAATAGGGG-------AATATTTGACCGTTCGCTCCAAAAAGAGGG-----TCCTATTGAAAAAGAAATAATCCAAAATAGAA--AGAAGTTTTTTTTTTT
Castellia_tuberculosa					1-----------------------------------------------------------------------------------------------------------------------------------------------------------------------------------------------------------------------AATAATCCAAAATAGAA--AGAAG-TTTTTTTTTT
Holcus_lanatus				deletion	CTTTCG----------------------------------------------------------------------------------------------------------------------------------------------------------------------------------------------------------------------------------------------TTTTTT
Scolochloa_festucaceae					1--CTTTCTT-TTTTTAAGGGTCCCCTGGG-----GGTCGTGGAATGCTTTTCTTCTCCTCTTATTCCATATGGAATACAAC---------------CAGTTAAAATAAGACAGTTAAAAT---------AAAATAAG--------AAG-GAATAGGGG-------AATATTTGACCGTTCACTCCAAAAAGAGGG-----TCCTATTGAAAAAGAAATAATCCAAAATAGAA--AGAAG-TTTTTTTTTT
Festuca_altissima					TTTCTTTTT-TTTTTAAGGGTCCCCCGGGG----GGTCGTGGAATGCTTTTCTTCTCCTCTTATTCCATATGGAATACAAC---------------CAGTTAAAATAAGACAGT-----T---------AAAATAAG--------AAG-GAATAGGGG-------AATATTTGACCGTTCACTCCAAAAAGAGGG-----TCCTATTGAAAAAGAAATAATCCAAAATAGAA--AGAAG--TTTTTTTTT
Festuca_arundinacea					1-CTTTCTTT-TTTTTAAGGGTCCCCCAGGGGGGAGGTCGTGGAATGCTTTTCTTCTCCTCTTATTCCATATGGAATACAACC--------------CAGTTAAAATAAGACACT-----T---------AAAATAAG--------AAG-GAATAGGGG-------AATATTTGACCCTTCACTCCAAAAAGATGG-----TCCTATTGAAAAAGAAATAATCCAAAATAGAA--ATAAGTTTTTTTTTTT
Festuca_pratensis					1-CTTTCTTT-TTTTTAAGGGTCCCCCAGGGGGGAGGTCGTGGAATGCTTTTCTTCTCCTCTTATTCCATATGGAATACAACC--------------CAGTTAAAATAAGACAGT-----T---------AAAATAAG--------AAG-GAATAGGGG-------AATATTTGACCCTTCACTCCAAAAAGATGG-----TCCTATTGAAAAAGAAATAATCCAAAATAGAA--ATAAG-TTTTTTTTTT
Lolium_multiflorum					1-CTTTCTTT-TTTTTAAGGGTCCCCCAGGGGGGAGGTCGTGGAATGCTTTTCTTCTCCTCTTATTCCATATGGAATACAACCCAGTTAAAATAAGACAGTTAAAATAAGACAGT-----T---------AAAATAAG--------AAG-GAATAGGGG-------AATATTTGACCCTTCACTCCAAAAAGATGG-----TCCTATTGAAAAAGAAATAATCCAAAATAGAA--ATAAG-TTTTTTTTTT
Lolium_perenne					1-CTTTCTTT-TTTTTAAGGGTCCCCCAGGGGGGAGGTCGTGGAATGCTTTTCTTCTCCTCTTATTCCATATGGAATACAACC--------------CAGTTAAAATAAGACAGT-----T---------AAAATAAG--------AAG-GAATAGGGG-------AATATTTGACCCTTCACTCCAAAAAGATGG-----TCCTATTGAAAAAGAAATAATCCAAAATAGAA--ATAAGTTTTTTTTTTT
Deschampsia_antarctica					CTTTCTTTT-TTTTTAAGGGTCCCCCAGGG----GGTCGTGGAATGCTTTTCTTCTCCTCTTATTCCATATGGAATACAAC---------------CAGTTAAAATAAGACAGTGAAAATAAGACAGTGAAAATAAG--------AAG-GAATAGGGGAATA-TTAATATTTGACCGTTCACTCCAAAAAGAGGG-----TCCTATTGAAAAAGAAATAATCCAAAATAGAA--AGAAG-TTTTTTTTTT
Puccinellia_nuttalliana					TTTCTTTTTGTTTTTAAGGGTCCCTCAGGG----GGTCTTGGAATGCTTTTCTTCTCCTCTTATTCCATATGGAATACAGC---------------CAGTT----------------------------AAAATAAG--------AAG-GAATAGGGG-------AATATTTAACCGTTCACTCCAAAAAGAGGG-----TCCTATTGAAAAATAAATAATCCAAAATAGAA--AGAAG-TTTTTTTTTT
Ammochloa_palestina					TCTTTTTTTTTTTTTAGAGTCCCAGGGGGGGGGGGGTCGTGGAAAGCTTTTCTTCTCCTCTTATTCCATATGGAATACAAC---------------CAGTTAAAATAAGACAGTT--------------AAAATAAG--------AAG-GAATAGGGG-------AATATTTGACCGTTCACTCCAAAAAGAGGG-----TCCTATTGAAAAAGAAATAATCCAAAATAGAA--AGCCG---TTTTTTTT
Lamarckia_aurea					1------TTTTTTTTTAAGGGTCTCA----GGGGGGGCCGTGGAAAGCTTTTCTTCTCCTCTTATTACATATGGAATACAAC---------------CAGTTAAAATAAGACAGTT--------------AAAATAAG--------AAG-GAATAGGGG-------AATATTTGACCGTTCACTCGAAAAAGAGGG-----TCCTATTGAAAAAGAAATAATACAAAATAGAA--AGAAG---TTTTTTTT
Dactylis_glomerata					1-------TTTTTTTTAAGGGTCTCAGGGGGGGGGGGCCGTGGAAAGCTTTTCTTCTCCTCTTATTCCATATGGAATACAAC---------------CAGTTAAAATAAGACAGTT--------------AAAATAAG--------AAG-GAATAGGGG-------AATATTTGACCGTTCACTCGAAAAAGAGGG-----TCCTATTGAAAAAGAAATAATACAAAATAGAA--AGAAG--TTTTTTTTT
Catapodium_rigidum					------CTTTTTTTT-------------------------------------------------------------------------------------------------------------------------------------------------------------------------------------------------------------------------------------------
Catapodium_marinum					------CTTTTTTTT-------------------------------------------------------------------------------------------------------------------------------------------------------------------------------------------------------------------------------------------
Desmazeria_sicula					1------CTTTTTTTTAAAGGTCCCCAGGGG----AGTCGTGGAATGCTTTTCTTCTCCTCTTATTCCATATGGAATACAAC---------------CAGCCAGTT------------------------AAAATAAG--------AAG-GAGTAGGGG-------AATATTTGACCATTCACTCCAAAAAGAGGG-----TCCTATTGAAAAAGAAATAATCCAAAATAGAA----ATAAGTTTTTTTTT
Amelichloa_brachychaeta	4	75860	75964	(105) 98	AATTTCCCTTTTCAATCCTT---TTTTTTTTTAGTATCGGAAGGAAAAA------GAAAGAAAAGATGGATTAGGTTGAACCTCAGAATCATGAAAAATTTGGTA
Kengyilia_melanthera					TTTTATCCTTTTCAAT-CTT---TCTTTTTTTAGTATCGGAAGGAAAAA------GAAAGAAAAGATGGATAGGGTTGAACCTCAGAGTCATGAAAAATTTGCTA
Triplachne_nitens					TTTGACCCTTTTCAATCC------TTTTATTTAGTATCGGAAGG-AAAAAGAAAGAA-----AAGATGGATTGGGTTGAACCTCAGAGTCATGAAAAATTTGGTA
Polypogon _fugax					TTTGACCCTTTTCAATCC------TTTTATTTAGTATCGGAAGG-AAAAAGAAAGAA-----AAGATGGATTGGGTTGAACCTCAGAATCATGAAAAATTGGATC
Koeleria_nitidula					TTTGACCCTTTTGAATCC------TTTTATTTAGTATCGGAAGG-AAAAAGAAAGAA-----AAGATGGATTGGGTTAAACCTCAGAGTCATG------------
Dichelachne_crinita					TTTGACCCTTTTCAATCC------TTTTATTTAGTATCGGAAGG-AAAAAGAAAGAA-----AAGATGGATTGGGTTGAACCTCAGAGTCATGAAAAATTTGGTA
Gastridium_ventricosum					TTTGACCCTTTTCAATCC------TTTTATTTAGTATCGGAAGG-AAAAAGAAAGAA-----AAGATGGATTGGGTTGAACCTCAGAGTCATGAAAAATTGGGTA
Agrostis_gigantea					TTTGACCCTTTTCAATCC------TTTTATTTAGTATCGGAAGG-AAAAAGAAAGAA-----AAGATGGATTGGGTTGAACCTCAGAGTCATGAAAAATTGGGTA
Agrostis_stolonifera					TTTGACCCTTTTCAATCC------TTTTATTTAGTATCGGAAGG-AAAAAGAAAGAA-----AAGATGGATTGGGTTGAACCTCAGAGTCATGAAAAATTAGGTA
Arrhenatherum_elatius					TTGGACCCTTTTGAATCC------TTTTTTTTAGTATCGGAAGG-AAAAATAAAGAA-----AAGATGGATTGGGTTGAACCTCAGAGTCATGAAAAATTTGGTA
Avena_sativa					TTTGACCCTTTTTAATCC------TTTTATTTAGTATCGGAAGG-AAAAAGAAAGAA-----AAGATGGATTGGCTTGAACCTCAGAGTTATGAAAAATTTGGTA
Calamagrostis_breviligulata					TTTGACCCTTTTCAATCC------TTTTATTTAGTATCGGAAGG-AAAAAGAAAGAA-----AAGATGGATTGGGTTGAACCTCAGAGTCATGAAAAATTTGGTA
Hierochloe_odorata					TTTGACCCTTTTCAATCC------TTTTATTTAGTATCGGAAGG-AAAAAGAAA--------------GATTGGGTTGAACCTCAGAGTCATGAAAAATTTGGTA
Trisetum_cernuum					TTTGACCCTTTTTAATCC------TTTTATTTAGTATCGGAAGGAAAAAAAAAAGAA-----AAGATGGATTGGGTTGAACCTCAGAGTCATGAAAAATTTGGTA
Anthoxanthum_odoratum					TTTGACCCTTTTCAACCC------TTTTATTTAGTATCGGAAGG-AAAAAGAAAGAA-----AAGATGGATTGGGTTGAACCTCAGAGTCATGAAAAATTTGGTA
Torreyochloa_pallida					TTGGACCCTTTTAAATCC------TTTTATTTAGTATCGGAAGG-AAAAAGAAAGAA-----AAGATGGATTGGGTTGAACCTCAGAGTCATGAAAAATTTGGTA
Phalaris_arundinacea				deletion	TTT--------------------------------------------------------------------------------------------------GGTA
Briza_maxima					TTAGACCCTTTTCAATCCTTTTATTTTTATTTAGTATCGTAAGG-AAAAAGAAAGAA-----AAGATGCATTGGGTTGAACCTCAGAGTCATGAAAAATTTGGTA
Helictochloa_hookeri					TTTGACCCTTTTCAATCC------GTTTATTTAGTATTGGAAGG-AAAAAGAAAGAA-----AAGATGGATTGGGTGGAACCTCAGAGTCATGAAAAATTTGGTA
Poa_palustrus					TTTGACCCTTTTCAATCC------TTTTA-TTAATATCGGAAGG-AAAAAGAAAGAA-----GAGATGGATTGGGTTGAACCTCAGAGTCATGAAAAATTTGATA
Alopecurus_arundinaceus					TTTGACCCTTTTCAATCC------TTTTA-TTGGTATCGGAAGG-AAAAAGAAAGAA-----AAGATGGATTGGGGTGAACCTCAAAGTCATGAAAAATTTTATA
Nephelochloa_orientalis				deletion	TTT--------------------------------------------------------------------------------------------------GATA
Ventenata_macra					TTTGACCCTTTTCAATCC------TTTTA-TTGGTATCGGAAAG-AAAAAGAAAGAA-----AAGATGGATTGGGGTGAACCTCAGAGTCATGAAAAATTTGATA
Poa_subgen_Stenopoa					TTTGACCCTTTTCAATCC------TTTTA-TTAATATCGGAAGG-AAAAAGAAAGAA-----GAGATGGATTGGGTTGAACCTCAGAGTCATGAAAAATTTGATA
Festuca_ovina					TTTGACTCTTTTCAATCC------TTTTACTTAGTATCGGAAGG-AAAAAGAAAGAA-----AAGATGGATTGGGTTGAACCTCAGAGTCATTAAAAATAGGGTA
Festuca_ovina_NC_019649					TTTGACTCTTTTCAATCC------TTTTACTTAGTATCGGAAGG-------------------------------------------------------------
Castellia_tuberculosa					TTTGACCCTTTTCAATCC------TTTTACTTAGTATCGGAAGG-AAAAAGAAAGAA-----AAGATGGATTGGGTTGAACCTCAGAGTCATGAAAAATTGGGTA
Holcus_lanatus					TTTGACCCTTTTCAATCC------TTTTA-TTAGTATCGGAAGG-AA----AAATAA-----AAGATGGATTGGGTTGAAGCTGAGAGTCATGAAAAATTTGGTA
Scolochloa_festucaceae					TTTGACCCTTTTCAATCC------TTTTACTTAGTATCGGAAGG-AAAAAGAAAGAA-----AAGATGGATTGGGTTGAACCTCAGAGTCATGAAAAATTTGGTA
Festuca_altissima					TTTGACCCTTTTCAATCC------TTTTACTTAGTATCGGAAGG-AAAAAGAAAGAA-----AAGATGGATTGGGTTGAACCTCAGAGTCATGAAAAATTTGGTA
Festuca_arundinacea					TTTGACCCTTTTCAATCC------TTTTACTTAGTATTGGAAGG-AAAAAGAAATAA-----AAGATGGATTGGGTTGAACCTCAGAGTCATGAAAAATTTGGTA
Festuca_pratensis					TTTGACCCTTTTCAATCC------TTTTACTTAGTATCGGAAGG-AAAAAGAAATAA-----AAGATGGATTGGGTTGAACCTCAGAGTCATGAAAAATTTGGTA
Lolium_multiflorum					TTTGACCCTTTTCAATCC------TTTTACTTAGTATCGGAAGG-AAAAAGAAATAA-----AAGATGAATTGGGTTGAACCTCAGAGTCATGAAAAATTTGGTA
Lolium_perenne					TTTGACCCTTTTCAATCC------TTTTACTTAGTATCGGAAGG-AAAAAGAAATAA-----AAGATGAATTGGGTTGAACCTCAGAGTCATGAAAAATTTGGTA
Deschampsia_antarctica					TTTGACCCTTTTCAATCC------TTTTA-TTAATATCGGAAGG-AAAAAGAAAGAA-----AAGATGGATTGGGTTGAACCTCAGAGTCATGAAAAATTTGGTA
Puccinellia_nuttalliana					TTTGACCCTTTTCAATCC------TTTTATTTAGTATCGGAAGG-AAAAATAAAGAA-----AAGATGGATTGGGTTGAACCTCAGAGTTATGAAAAATTGGGTA
Ammochloa_palestina					TTTGACCCTTTTCAATCC------TTTTA-TTAGTATCGGAAGG-AAAAAGAAAGAAAAGATAAGATGGATTGGGTTGAACCTCAGAGTCATGAAAAATCTGGTA
Lamarckia_aurea					TTTGACCCTTTTCAATCC------TTTTA-TTAGTATCGGAAGG-AAAAAGAAAGAA-----AAGATGGATTGGGTTGAACCTCAGAGTCATGAAAAATCTGGTA
Dactylis_glomerata					TTTGACCCTTTTCAATCC------TTTTA-TTAGTATCGGAAGG-AAAAAGAAAGAA-----AAGATGGATTGGGTTGAACCTCAGAGTCATGAAAAATCTGGTA
Catapodium_rigidum					TTTGACCCTTTGGAATCC------TTTTA-TTAGTATCGTAAGG-AAAAAGAAAGAA-----AAGATGGATTGGGTGGAACCTTAGAGTCATGAAAAATCTGGTA
Catapodium_marinum					TTTGACCCTTTGGAATCC------TTTTA-TTAGTATCGTAAGG-AAAAAGAAAGAA-----AAGATGGATTGGGTGGAACCTTAGAGTCATGAAAAATCTGGTA
Desmazeria_sicula					TTCGACCCTTTGGAATCC------TTTTA-TTAGTATCGTAAGG-AAAAAGAAAGAA-----AAGATGGATTGGGTTGAACCTTAGAGTCATGAAAAATCTGGTA
Amelichloa_brachychaeta	5	125206	125034	(171) 164	ATA--TTTTTTTGTGTATAAGCTGTATAGTTAGAA-----ATTATATCACGAAAATCTAGTCTGATT--TTAAATCAGGGATAATTTGCAATAAGC-AGTAGTTATTCG-------------------------TTTTTCTTTATAG-TTAGTAAAGAATTTTTGGATTTT
Kengyilia_melanthera				ancestral condition	GTA--TTTTTTT-TGTATAAACTGTATAGTTAGAAATTATATTATATCACGAAAATCTAGTCTGATT--TAAAATAAGAAATTATTTACAATAAGC-AGTAGTTATTCG-------------------------TTTTTCTTTATAGTTTAATAAAGAATTATTAGATTTT
Triplachne_nitens					ATATTTTTTTTTGTATATAAGCTGTATAGTTATAA-----ATTATATCACGAAAATCTAGTCTGATT--TAAAATACTAAAAAATTTCCAATAAGCA-GTAGTTATTGG-------------------------TTTTTCTTTATAGTTTAGTAAAGGATTCTTCTTTTTT
Polypogon _fugax					ATA-CTTTTTTTGTGTATAAGCTGTATAGTTAGAA-----ATTATATCACAAAAATCTAGTCTGATT--TAAAATATTAAAAAATTTCCAATAAGCA-GTAGTTATTCG-------------------------TTTTTCTTTATAG-TTAGTAAAGGAGTATTCTTTTTT
Koeleria_nitidula					ATA-TTTTTT-TTTGTATAAGCTGTATAGTTAGAA-----ATTATATCACGAAAATCTAGTCTGATT--TAAAATAATCAAAAATTTCCAATAAGCATGTAGTTATTCT-------------------------TTTTTCTTTATAG-TTAGTAAAGGATTATTCTTTTTT
Dichelachne_crinita					ATA-TTTTTTTTGTGTATAAGCTGTATAGTTAGAA-----ATTATATCACGAAAATCTAGTCTGATT--TAAAATAATAAAAAATTTCCAATAAGCA-GTAGTTATTCG-------------------------TTTTTCTTTATAG-TTAGTAAAGGATTATTCTTTTTT
Gastridium_ventricosum					ATA-TTTTTTTTGTATATAAGCTGTATAGTTAGAA-----ATTATATCACGAAAATCTAGTCTGATT--TAAAATACTAAAAAATTTCCAATAAGCA-GTAGTTATTGG-------------------------TTTTTATTTATAG-TTAGTAAAGGATTCTTCTTTTTT
Agrostis_gigantea					ATA-CTTTTTTTGTGTATAAGCTGTATAGTTAGAA-----ATTATATCACGAAAATCTAGTCTGATT--TAAAATACTAAAAAATTTCCAATAAGCA-GTAGTTATTCG-------------------------TTTTTCTTTATAG-TTAGTAAAGGAGTATTCTTTTTT
Agrostis_stolonifera					ATATTTTTTTTTGTGTATAAGCTGTATAGTTAGAA-----ATTATATCACGAAAATCTAGTCTGATT--TAAAATACTAAAAAATTTCCAATAAGCA-GTAGTTATTCG-------------------------TTTTTCTTTATAG-TTAGTAAAGGATTATTCTTTTTT
Arrhenatherum_elatius					ATA-TTTTTTTTGTGTATAAGCTGTATAGTTAGAA-----ATTATATCACGAAAATCTAGTCTGATT--TAAAATAATCCAAAATTTCCAATAAGCATGTAGTTATTCG-------------------------TTTTTCTTTATAG-TTAGTAAAGGATTATTCTTTTTT
Avena_sativa					ATA-TTTTTTGGGGGTATAAGCTGTATAGTTAGAA-----ATTATATCACGAAAATCTAGTCTGATT--TAAAATAATCAAAAATTCCGAATAAGCATGTAGTTATTCG-------------------------TTTTTCTTTATAG-TTAGTAAAGGATTATTCTTTTTT
Calamagrostis_breviligulata					ATA-TTTTTTTTGTGTATAAGCTGTATAGTTATAA-----ATTATATCACGAAAATCTAGTCTGATT--TAAAATACTAAAAAATTTCCAATAAGCA-GTAGTTATTCG-------------------------TTTTTCTTTATAG-TTAGTAAAGGATTATTCTTTTTT
Hierochloe_odorata					ATA-TTTTTTTTGTGTATAAGCAGTATAGTTAGAA-----ATTATATCATGAAAATCTAGTCTGATT--TAAAATAATAAAAAATTTCCAATAAGCA-GTAGTTATTCG-------------------------TTTTTATTTATAG-TTAGTAAAGGATTATTCTTTTTT
Trisetum_cernuum					ATA-TTTTTT-TTTGTATAAGTTGTATAGTTAGAA-----ATTCTATCACGAAAATCTAGTCTGATT--TAAAAAAATCAAAAATTTCCAATAAGCATGTAGTTATTCG-------------------------TTTTTCTTTATAG-TTAGTAAAGGATTATTCTTTTTT
Anthoxanthum_odoratum					ATA-TTTTTTTTGTGTATAAGCTGTATAGTTAGAA-----ATTATATCATGAAAATAGAGTCTGATT--TAAAATAATAAAAAATTCCCAATAAGCA-GTAGTTATTCA-------------------------TTTTTCTTTATAA-TTAGTAAAATATTATTCTTTTTG
Torreyochloa_pallida					ATATTTTTTTTTGTGTATAAGCTGTATAGTTAGAA-----ATTATATCACGAAAATCTAGTCTGATTTATAAAATAATAAAAAATTTCCAATAAGCA-TTAGTTATTAG-------------------------TTTTTATTTATAG-TTAGTAAAGGATTATTCTTTTTT
Phalaris_arundinacea					ATA-TTTTTTTTGTGTATAAGCTGTATAGTTAGAA-----ATTATATCACGAAAATCTAGTCTGATT--TAAAATAATAAAAAATTTCCAATAAGCA-GTAGTTATTAG-------------------------TTTTTCTTTATAG-TTAGTAAAGGATTATTCTTTTTT
Briza_maxima					ATA-TTTTTTTTGTGTATAAGCTGTATAGTTAGAA-----ATTATATCACGAAAATCTAGTCTGATT--TAAAATAATCAAAAATTTCCAATAAGTA-GTAGTTATTTG-------------------------TTTTTCTTTATAGTTTAGTAAAGGATTATTCTTTTTT
Helictochloa_hookeri				deletion	AG--------------------------------------------------------------------------------------------------------------------------------------------------------------------ATTTT
Poa_palustrus					ATA--TTTTTTTGTGCATAAGCTGTATAGTTAGAA-----ATTATATCACGAAAATCTAGTCTGATT--TA--------AAAAATTTCC-AATAAGCAGTAGTTATTTG-------------------------TTTTTCTTTATAG-TTAGCAAAGGATTATTCGATTTT
Alopecurus_arundinaceus					ATA--TTTTTTTGTGTATAAGCTGTATAGTTAGAAATTTTATTATATCACGAAAATATAGTCTGATT--TAAAATAATAAAAAATTTCCAAATAAGGAGTAGTTATTTG-------------------------TTTTTCTTTATAG-TTAGCAAAGGATT-----TTTTT
Nephelochloa_orientalis					ATA--TTTTTTTGTGTATAAGCTGTATAGTTAGAA-----ATTATATCACGAAAATCTAGTCTGATT--TAAAATAATAAATAATTTCC-AATAAGCAGTAGTTATTTGTTTTTATTTATAGTTAGGAAAGGTATTTTTCTTTATAG-TTAGCAAAGGATT-----ATTTT
Ventenata_macra					ATA--TTTTTTTGTGTATAAGCTGTATAGTTAGAA-----ATTATATCACTAAAATCTAGTCTTATT--TAAAATAATAAATAATTTCC-AATAAGCAGTAGTTATTTGTTTTTCTTTATAGTTAGCAAAGGTGTTTTTCTTTATAG-TTAGCAAAGGATT-----ATTTT
Poa_subgen_Stenopoa					ATA--TTTTTTTGTGTATAAGCTGTATAGTTAGAA-----ATTATATCACGAAAATCTAGTCTGATT--TAAAATAATCAAAAATTTCC-AATAAGCAGTAGTTATTTG-------------------------TTTTTCTTTATAG-TTAGCAAAGGATTATTCGATTTT
Festuca_ovina				deletion	AT--------------------------------------------------------------------------------------------------------------------------------------------------------------------ATTTT
Festuca_ovina_NC_019649				deletion	AT--------------------------------------------------------------------------------------------------------------------------------------------------------------------ATTTT
Castellia_tuberculosa				deletion	AT--------------------------------------------------------------------------------------------------------------------------------------------------------------------ATTTT
Holcus_lanatus				deletion	AT--------------------------------------------------------------------------------------------------------------------------------------------------------------------ATTTT
Scolochloa_festucaceae				deletion	AT--------------------------------------------------------------------------------------------------------------------------------------------------------------------ATTTT
Festuca_altissima				deletion	AT--------------------------------------------------------------------------------------------------------------------------------------------------------------------ATTTT
Festuca_arundinacea				deletion	AT--------------------------------------------------------------------------------------------------------------------------------------------------------------------ATTTT
Festuca_pratensis				deletion	AT--------------------------------------------------------------------------------------------------------------------------------------------------------------------ATTTT
Lolium_multiflorum				deletion	AT--------------------------------------------------------------------------------------------------------------------------------------------------------------------ATTTT
Lolium_perenne				deletion	AT--------------------------------------------------------------------------------------------------------------------------------------------------------------------ATTTT
Deschampsia_antarctica				deletion	AT--------------------------------------------------------------------------------------------------------------------------------------------------------------------ATTTT
Puccinellia_nuttalliana					ATA--TTTTTTTGTGTATAAGCTGTATAGTTAGAA-----ATTATATCACGAAAATCTAGTCTGATT--TAAAATAATAAAAAATTTCC-AAAAAGCAGTAGTTATTTG-------------------------TTTTTCTTTATAG-TTAGCAAAGGATTCTTATATTTT
Ammochloa_palestina				deletion	AT--------------------------------------------------------------------------------------------------------------------------------------------------------------------ATTTT
Lamarckia_aurea				deletion	AT--------------------------------------------------------------------------------------------------------------------------------------------------------------------ATTTT
Dactylis_glomerata				deletion	AT--------------------------------------------------------------------------------------------------------------------------------------------------------------------ATTTT
Catapodium_rigidum				deletion	AT--------------------------------------------------------------------------------------------------------------------------------------------------------------------ATTTT
Catapodium_marinum				deletion	AT--------------------------------------------------------------------------------------------------------------------------------------------------------------------ATTTT
Desmazeria_sicula				deletion	AT--------------------------------------------------------------------------------------------------------------------------------------------------------------------ATTTT

## Sheet: G1&G2 BINARY
	1	2	3	4	5
Amelichloa_brachychaeta	0	0	0	0	0
Kengyilia_melanthera	0	0	0	0	0
Triplachne_nitens	0	0	0	0	0
Polypogon _fugax	0	0	0	0	0
Koeleria_nitidula	0	0	0	0	0
Dichelachne_crinita	0	0	0	0	0
Gastridium_ventricosum	0	0	0	0	0
Agrostis_gigantea	0	0	0	0	0
Agrostis_stolonifera	0	0	0	0	0
Arrhenatherum_elatius	0	0	0	0	0
Avena_sativa	1	1	0	0	0
Calamagrostis_breviligulata	0	0	0	0	0
Hierochloe_odorata	0	0	0	0	0
Trisetum_cernuum	0	1	0	0	0
Anthoxanthum_odoratum	0	0	1	0	0
Torreyochloa_pallida	0	0	0	0	0
Phalaris_arundinacea	0	0	0	1	0
Briza_maxima	1	0	0	0	0
Helictochloa_hookeri	0	0	0	0	1
Poa_palustris	0	0	0	0	0
Alopecurus_arundinaceus	0	0	0	0	0
Nephelochloa_orientalis	0	0	0	1	0
Ventenata_macra	1	0	0	0	0
Poa_subgen_Stenopoa	0	0	0	0	0
Festuca_ovina	0	0	0	0	1
Festuca_ovina_NC_019649	0	0	0	0	1
Castellia_tuberculosa	0	0	0	0	1
Holcus_lanatus	0	0	1	0	1
Scolochloa_festucaceae	0	0	0	0	1
Festuca_altissima	0	0	0	0	1
Festuca_arundinacea	0	0	0	0	1
Festuca_pratensis	0	0	0	0	1
Lolium_multiflorum	0	0	0	0	1
Lolium_perenne	0	0	0	0	1
Deschampsia_antarctica	0	0	0	0	1
Puccinellia_nuttalliana	0	0	0	0	0
Ammochloa_palestina	0	0	0	0	1
Lamarckia_aurea	0	0	0	0	1
Dactylis_glomerata	0	0	0	0	1
Catapodium_rigidum	0	0	0	0	1
Catapodium_marinum	0	0	0	0	1
Desmazeria_sicula	0	1	0	0	1

## Sheet: G1
Alignment	Number	Length	Nuc. Beg.	Nuc. End.	Sequence
Triplachne_nitens	1	186	6911	7096	CTA------AAATAAAGTATTCCACTTAAAAGATTGAAAGTTTTTGGTAGTTATAGAATTCTCGTACTTCC-----TCTTCGACTCGAATACA--AAAAAAAAGTAAGAAAAA-AATATGATTAAGTGA---ATAGTGGAGGCATATCCTAAATGTGCCTGATAGACACAATTTTGTCAT-AAAAT
Polypogon_fugax					CTA------AAA-AAAGTATTCCACTGAAAAGATTGAAAGTTTTTGGTAGTTATAGAATTCTCGTACTTCCATACTTCTTCGACTCGAATACA--AAAAAAAAGTAATAAAAA-AATATGATTAAGTGA---ATAGTGCAGGCATATCCTGAATGTGCCTGATAGACACAATTTTGTCAT-AAAAT
Koeleria_nitidula					ACT------AAAAAAAGTTTTCCAATGAAAAGATTGAAAGTTTTTGGTAGTTATAGAATTCTCGTACTTCCATACTTCTTCGACTCGAATACA--AAAATAAAGTAAGAAAAA-AATATGACTAAGTAA---ATAGCGTAGGCATATCCTGAATGTGCCTGATAGACACAATTTTTTCAT-AAAAT
Gastridium_ventricosum					CTA------AAATAAAGTATTCCACTTAAAAGATTGAAAGTTTTTGGTAGTTATAGAATTCTCGTACTTCC-----TCTTCGACTCGAATACA--AAAAAAAAGTAAGAAAAA-AATATGATTAAGTGA---ATAGTGGAGGCATATCCTAAATGTGCCTGATAGACACAATTTTGTCAT-AAAAT
Dichelachne_crinita					1------------AAAGTATTCCACTGAAAAGATTGAAAGTTTTTGGTAGTTATAGAATTCTCGTACTTCCATACTTCTTCGACTCGAATAC---AAAAAAAAGTAAGAAAAA-AATATGATTAAGTGA---ATAGTGGAGGCATATCCTGAATGTGCCTGATAGACACAATTTTGTCAT-AAAAT
Arrhenatherum_elatius		180 (Deletion)	6914	7093	CTA------------------------------------------------------------------------------------------------------------------------------------------------------------------------------------AAT
Agrostis_gigantea					CTA------AAA-AAAGTATTCCACTGAAAAGATTGAAAGTTTTTGGTAGTTATAGAATTCTCGTACTTCCATACTTCTTCGACTCGAATACA--AAAAAAAAGTAAGAAAAA-AATATGATTAAGTGA---ATAGTGCAGGCATATCCTGAATGTGCCTGATAGACACAATTTTGTCAT-AAAAT
Calamagrostis_breviligulata					CTA------AAA-AAAGTATTCCACTGAAAAGATTGAAAGTTTTTGGTAGTTATAGAATTCTCGTACTTCCATACTTCTTCGACTCGAATACA--AAAAAAAAGTAAGAAAAA-AATATGATTAAGTGA---ATAGTGGAGGCATATCCTGAATGTGCCTGATAGACACAATTTTGTCAT-AAAAT
Agrostis_stolonifera					CTA------AAA-AAAGTATTCCACTGAAAAGATTGAAAGTTTTTGGTAGTTATAGAATTCTCGTACTTCCCTACTTCTTCGACTCGAATACA--AAAAAAAAGTAAGAAAAAAAATATGATTAAGTGA---ATAGTGGAGGCATACCCTGAATGTGCCTGATAGACACAATTTTGCCAT-AAAAT
Hierochloe_odorata					ACT------AAAAAAAGTATTCCAATGAAAAGATTGAAAGTTTTTGGTAGTTATAGAATTCTCGTACTTCCATACTTCTTCGACTCGAATAAAAAAAAAAAAAGTAAGAAAAA-AATATGATTAAGTGA---ATAGTGGAGGCATATCCTGAATGTGCCTGATAGACACAATTTTGTCAT-AAAAT
Torreyochloa_pallida		104 (Deletion)	6944	7047	ACT------AAAAAAAGTATTCCAATGAAAAAG--------------------------------------------------------------------------------------------------------GGATGCATATCCTGAATGTGGCTGATAGAGACAATTTTTTCAT-AAAAT
Phalaris_arundinacea					CTAAAAAATAAAAAAAGTATTCCAATGAAAAGATTGAAAGTTTTTGGTAGTTATAGAATTCTCGTACTTCCATACTTCTTCGACTCGAATAC---AAAAAAAAGTAAGAAAAA-AATATGATTAAGTGA---ATAGTGGAGGCATATCCTGAATGTGCCTGATAGAGACAATTTTGTCAA-AAAAT
Trisetum_cernuum					ACT------AAAAAAAGTTTTCCAATGAAAAGATTGAAAGTTTTTGGTAGTTATAGAATTCTCGTACTTCCATACTTTTTCGACTCGAATACA--AAAAAAAAGTAAGAAAAA-AATATGACTAAGTCA---ATAGCGTAGGCATATCCTGAATGTGCCTGATAGACACAATTTTTTCAT-AAAAT
Avena_sativa					ACT-------AAAAAAGTATTCCAATGAAAAGATTGAAAGTTTTTGGTAGTTATAGAATTCTCGTACTTCCATACTTCTTCGACCCGAATACA--AAAAAAAAGTAAGAAAAA-AATATGACTAAGTAA---ATAGCGTAGGCATATCCTGAATGTGCCTGATAGACACAATTTTTTCAT-AAAAT
Anthoxanthum_odoratum					CTA-------AAAAAAGTATTCCAATGAAAAGATTGAAAGTTTTTGGTAGTTATAGAATTCTCGTACTTCCATACTTCTTCGACTCGAATA----AAAAAAAAGTAAGAAAAAAAATATGATTAAGTGA---ATAGTGGAGGCATATCCTGAATGTACCTGATAGACATAATTTTGTCAT-AAAAT
Briza_maxima					ACT------AAAAAAAGTATTTCAATGAAAAGATTGAAAGTTTTTGGTAGTTATAGAATTCTCGTACTTCCATACTTCTTCGACTCGAATACA--AAAACAAAGTAAGAAAAA-AATATGATTAAGTGA---ATATTGGAGGCATATCCTGAATGTGCCTGATAGACACAATTTTGTTAT-AAAAT
Amelichloa_brachychaeta					1------------------TTCCAATGAAAAGATTGAAAGTTTTTGGTAGTTATAGAATTCTCGTACTTCCGTACTTCTTCAACTCAAATAC---AAAAAAAAGTAAGAAAAA-AATATGATTAAGTGATTTATAGTAGAGGCATATCCTGAATGTTACTGATAGACCCCATTTTTTCATGAAAAT
Triplachne_nitens	2	115	7105	7219	TCAATTTGACTGGACTTAAGACTTTATTATGTTTTCTGGGAAAGAAAATGAATGCTTAGAAATGCATCTAATCTAAGAGTTCCTAAGATATCGTTATTCTCT--------TTAAT
Polypogon_fugax					TCAATTTGACTGGGCTTAAGACTTTATTATGTTTTCTGGGAAAGAAAATGAATGCTTAGAAATGCATCTAATCTAAGAGTTCATAAGATATCGTTATTTTCT--------TTAAT
Koeleria_nitidula					TCAATTTGACTGGACTTAAGACTTGATTATGTTTTCCGAGAAAGAAAATGAATGCTTAGAAATGCATCTAATCTAAGAGTTCATAAGATATCATTATTCTCT--------TTAAT
Gastridium_ventricosum					TCAATTTGACTGGACTTAAGACTTTATTATGTTTTCTGGGAAAGAAAATGAATGCTTAGAAATGCATTTAATCTAAGAGTTCATAAGATATCGTTATTCTCT--------TTAAT
Dichelachne_crinita					TCAATTTGACTGGACTTAAGACTTTATTATGTTTTCTGGGAAAGAAAATGAATGCTTAGAAATGCATCTAATCTAAGAGTTCATAAGATATCATTATTCTCT--------TTAAT
Arrhenatherum_elatius					TCAATTTGACTGGACTTAAGACTTTATTATGTTTTCTGAGAAAGAAAATGAATGCTTAGAAATGCATCTAATCTAAGAGTTCATAAGATATCATTATTCTCT--------TTAAT
Agrostis_gigantea					TCAATTTGACTGGACTTAAGACTTTATTATGTTTTCTGGGAAAGAAAATGAATGCTTAGAAATGCATCTAATCTAAGAGTTCATAAGATATCATTATTTTCT--------TTAAT
Calamagrostis_breviligulata					TCAATTTGACTGGACTTAAGAATTTATTATGTTTTCTGGGAAAGAAAATGAATGCTTAGAAATGCATCTAATCTAAGAGTTCATAAGATATCGCTATTCTCT--------TTAAT
Agrostis_stolonifera					TCAATTTGACTGGACTTAAGACTTTATTATGTTTTCTGGGAAAGAAAATGAATGCTTAGAAATGCATCTAATCTAAGAGTTCATAAGATATCGTTATTCTCT--------TTAAT
Hierochloe_odorata					TCAATTTGACTGGACTTAAGACTTTATTATGTTTTCTGGGAAAAAAAATGAATGCTTAGAAATGCATCTAATCTAAGAGTTCATAAGATATCATTATTCTCT--------TTAAT
Torreyochloa_pallida					TAAATTTGACTGGACTTAAGACTTTATTATGTTTTCTGAGAAAGAAAATGAATGCTTAGAAATGCATCTAATCTAAGAGTTCATAAGATATCATTATTCTCT--------TTAAT
Phalaris_arundinacea					TAAATTTGACTGGACTTAAGACTTTATTATGTTTTCTGAGAAAGAAAATGAATGCTTAGAAATACATCTAATCTAAGAGTTCATAAGATATCATTATTCTCT--------TTAAT
Trisetum_cernuum					TCAATTTGACTGGACTTAAGACTTGATTATGTTTTCTGAGAAAGAAAATGAATGCTTAGAAATGCATTTAATCTAAGAGTTCATAAGATATCATGATTCTCT--------TTAAT
Avena_sativa					TATTCCACTGAAAAGATTGAAAGTTTTTGGTAGTTATAGAATTCTCGTACTTCCATACTTCTTCGACTCGAAAATGAATGCTTAGAAATGCATCTAATCTAAGAGTTCATAAGATATCATTATTCTCT--------TTAAT
Anthoxanthum_odoratum		109 (Deletion)	7108	7216	TCA-------------------------------------------------------------------------------------------------------------AAT
Briza_maxima					TCAATTTGACTGGACTTAAGACTTTATTATGTTTTCTGGGAAAGAAAATAAATGCTTAGAAATGCAT-----CTAAGAGTTCATAAGATATCATTATTCTCT--------TTAAT
Amelichloa_brachychaeta					TCAATTTGACTGGACTTAAGACTTTATTATGTTTTCAGAGAAAACAAGTGAATGCTTAGAAATGCATCTACTCTAAGAGTTCATAAGATACCATTATTTTCTTTAATAAATTAAT
Triplachne_nitens	3	267	8017	8283	TCAAAAATGAAAATTATTCTACATTGAATGGATAGCTGCAGCAATAAATTCGGATCAGCCTTTCTACCCTTCTGCACTTACGTTGAGCAGGTACCTTTAGGTACCTACACAATACCTAACCGTATTTTTGATATTGATAAGAGTGCTTATTAAAAATGAATTCTTGCAA-----TTTTTTTCAAG----AATTCATTTTTGCATTTTTAGGTATCAAAAT----AAACA-AAATCCATCCTAGTGGATCCGTGTGGTAAGGAAAAAC
Polypogon_fugax					TCTAAAATGAAAATTATTCTACATTGAATGGATAGCTGTAGCAATAAATTCGGATCAGCCTTTCTACCCTTCCGCACTTACGTTGAGC----------AGGTACCTACACAATACCTAACCGTATTTTTGATATTGATAAGAGTGCTTATTATAAATGAATTCTTTCAATTTTTTTTTTTTCAAG----AATTCATTTTTGCATTTTTAGGTAGCAAAAT----AAACA-AAACCCATCCTAGTGGATCCGTGTGGTAAGGAAAAAC
Koeleria_nitidula					TCTAAAATGAAAATTCTTCCACATTGAATAGATAGCTGCAGCAATAAATTTGGATCAGCCTTTCTACCCTTCTGCACTTACGTTGAGC----------AGGTACCTACACAATACCTAACCCTA-TTTTGATATTGATAAGAGTACTTATTATAAATGAATTCTTGAAA-----AAAATTGCAAGAATTAATTCATTTTTGCATTTTTAGGTATCAAAAT----AAACA-AAATCTATCCTAGTGGATCCGTGTGGTAAGGAAAAAC
Gastridium_ventricosum					TCAAAAATGAAAATTATTCTACATTGAATGGATAGTTGCAGCAATAAATTCGGATCAGCCTTTCTACCCTTCTGCACTTACGTTGAGCAGGTACCTTTAGGTACCTACACAATACCTAACCGTATTTTTGATATTGATAAGAGTGCTTATTAAAAATGAATTCTTGCAA-----TTTTTTTCAAG----AATTCATTTTTGCATTTTTAGGTATCAAAAT----AAACA-AAATCCATCCTAGTGGATCCGTGTGGTAAGGAAAAAC
Dichelachne_crinita					TCTAAAATGAAAATTCTTCTACATTGAATGGATAGCTGCAGCAATAAATTCGGATCAGCCTTTCTACCCTTCTGCACTTACGTTGAGCAGGTACCTTTAGGTACCTACACAATACCTAACCGTATTTTTGATATTGATAAGAGTGCTTATTATAAATGAATTCTTGAAA-----AAAATTGCAAG----AATTCATTTTTGCATTTTTAGGTATCAAAAT----AAACA-AAATCCATCCTAGTGGATCCGTGTGGTAAGGAAAAAC
Arrhenatherum_elatius					TCTAAAATGCAAATTCTTCTACATTGAATAGATAGCTGCAGCAATAAATTTGGATCAGCCTTTCTACCCTTCTGCACTTACGTTGAGT----------AGGTACCTACACAATACCTAACCCTA-TTTTGATATTGATAAGAGTGCTTATTCTAAATGAATTCTTGCAA-----TTTTTTTCAAG----AATTCATTTTTGCATTTTTAGGTATCAAAATAAAAAAAAAAAAATTCATCCTAGTGGATCCGTGTGGTAAGGAAAAAC
Agrostis_gigantea					TCTAAAATGAAAATTATTCTACATTGAATGGATAGCTGCAGCAATAAATTCGGATCAGCCTTTCTACCCTTCTGCACTTACGTTGAGC----------AGGTACCTACACAATACCTAACCGTATTTTTGATATTGATAAGAGTGCTTATTATAAATGAATTCTTTCAA-----TTTTTTGAAAG----AATTCATTTTTGCATTTTTAGGTATCAAAAT----AAACA-AAACCCATCCTAGTGGATCCGTGTGGTAAGGAAAAAC
Calamagrostis_breviligulata					TCTAAAATGAAAATTATTCTACATTGAATGGATAGCTGCAGCAATAAATTCGGATCAGCCTTTCTACCCTTCTGCACTTACGTTGAGCAGGTACCTTTAGGTACCTACACAATGCCTAACCATATTTTTTATATTGATAAGAGTGCTTATTATAAATGAATTCTTGCAA-----TTTTTTTCAAG----AATTCATTTTTGCATTTTTAGGTATCAAAAT----AAACA-AAATCCATCCTAGTGGATCCGTGTGGTAAGGAAAAAC
Agrostis_stolonifera					TCTAAAATGAAAATTCTTCTACATTGAATGGATAGCTGCAACAATAAATTCGGATCAGCCTTTCTACCCTTCTGCACTTACGTTGAGC----------AGGTACCTACACAATACCTAACCGTATTTTTGATATTGATAAGAGTGCTTATTATAAATGAATTCTTGCAA--TTTTTTTTTTCAAG----AATTCATTTTTGCATTTTTAGGTATCAAAAT----AAACA-AAATCCATCCTAGTGGATCCGTGTGGTAAGGAAAAAC
Hierochloe_odorata					TCTAAAATGAAAATTCTTCTACATTGAATGGATAGCTGCAGCAATAAATTTGGATCAGCCTTTCTACCCTTCTGCACTTACGTTGAGCAGGTACCTTTAGGTACCTACACAATACCTAACCATATTTTTGATATTGATAAGAGTGCTTATTATAAATGAATTCTTGGAA-----TTTTTTTCAAG----AATTCTTTTTTGCATTTTTAGGTATCAAAAT----AAACA-AAATCCATCCTAGTGGATCCGTGTGGTAAGGAAAAAC
Torreyochloa_pallida					TCAAAAATGAAAATTCTTCTACATTGAATGGATAGCTGCAGCAATAAATTTGGATCAGCCTTTCTACCCTTCTGCACTTACGTTGAGCAGGTACCTTTAGGTACCTACACAATACCTAACCCTATTTTTGATATTCATAAGAGTACTTATTATAAATGAATTCTTGCAA-----TTTTTTTCAAG----AATTCATTTTTGCATTTTTGGGTATCAAAAT----AAACA-AAATTCATCCTAGTGGATCCGTGTGGTAAGGAAAAAC
Phalaris_arundinacea					TCTAAAATGAAAATTCTTCTACATTGAATGGATAGCTGCAGCAATAAATTTGGATCAGCCTTTCTACCCTTCTGCACTTACGTTGAGCAGGTACCTTTAGGTACCTACACAATACCTAACCCTATTTTTTATATTGATAAGAGTGCTTATTATAAATGAATTCTTGAAA-----AAAATTGCAAG----AATTCATTTTTGCATTTTTAGGTATCAAAAT----AAAAAAAAATCCATCCTAGTGGATCCGTGTGGTAAGGAAAAAC
Trisetum_cernuum		261 (Deletion)	8020	8280	TCT---------------------------------------------------------------------------------------------------------------------------------------------------------------------------------------------------------------------------------------------------------------------AAC
Avena_sativa					TCTAAAATGAAAATTCTTCTACATTGAATAGATAGCTGCAGCAATAAATTTGGATCAGCCTTTCTACCCTTCTGCACTTACGTTGAGC----------AGGTACCTACACAATACCTAACTCTA-TTTTGATATTGATAAGAGTGCTTATTATAAATGAATTCTTGCAA-----TTTTTTTTCAAG---AATTCTTTTTTGCATTTTTAGGTATCAAAAT-AAAAAAAA-AAATCCATCCTAGTGGATCCGTGTGGTAAGGAAAAAC
Anthoxanthum_odoratum					TCTAAAATGAAAATTCTTCTACATTGAATGGATAGCTGCAGCAATAAATTTGGATCAGCCTTTCTACCCTTCTGCACTTACGTTGAGCAGGTACCTTTAGGTACCTACACAATACCTAACCATATTTTTGATATTGATAAGAGTGCTTATTCTAAAAGAATTCTTGGAA--TTTTTTTTTTCAAG----AATTCTTTTTTGCATTTTTAGGTATCAAAAT----AAACA-AAATCCATCCTAGTGGATCCGTGTGGTAAGGAAAAAC
Briza_maxima					TCTAAAATGAAAATTCTTCTACATTGAATGGATAGCTGCAGCAATAAATTCGGATCAGCCTTTCTACCCTTCTGCACTTACGTTGAGC----------AGGTACCTACACAATACCTAACCGTATTTTTGATATTGATAAGAGTGCTTATTATAAATGAATTCTTGCAA-----TTTTTTTTAAG----AATTCATTTTTTCCTTTTTAGATATCAAAAT----AAAAAAAAATCCATCCTAGTGGATCCGTGTGGTAAGGAAAAAC
Amelichloa_brachychaeta					TCTAAAATGCAAATTCTTCTACATTGAATGGATAGCTGCAACAATAAATTTGGACCAGCCTTTCTACCCTTCTGCACCTACGTTGAGCAGGTACCTTTAGGTACCTACACAATACCTAACCTTATTTTTTATATTGATAAGACTGCTTATTATAAAGCAAT-------------TTTTTTTTAAG----AATTGATTTTTGCATTTTTCGGTGTCAAAA-----------AAAACCATCCTAGTGGATCCGTGTGGTAAAGAAAAAA
Triplachne_nitens	4	68	13379	13446	TTTAACTAC----TTA------TATTAAATTAAGTA-TTAAGTAGGTGTTAGTCTAGTACCGTATCCC
Polypogon_fugax					TTTAACTAC----TTA------TATTAAATTAAGTA-TTAAGTAGGTGTTAGTCTAGTACCGTATCCC
Koeleria_nitidula					TTTAACTACTTATTTA------TATTCACTTAAGTATTTAAGTAGGTGTTAGTCTAGTACAGTATCCC
Gastridium_ventricosum					TTTAACTAC----TTA------TATTAAATTAAGTA-TTAAGTAGGTGTTAGTCTAGTACCGTATCCC
Dichelachne_crinita					TTTAACTAC----TTA------TATTAAATTAAGTA-TTAAGTAGGTGTTAGTCTAGTACCGTATCCC
Arrhenatherum_elatius					TTTAACTAC----TTA------TATTCAATTAAGTAGTTAAGTAGGTGTTAGTCTAGTACCCTATCCC
Agrostis_gigantea					TTTAACTAC----TTA------TATTAAATTAAGTA-TTAAGTAGGTGTTAGTCTAGTACCGTATCCC
Calamagrostis_breviligulata					TTTAACTAC----TTA------TATTAAATTAAGTA-TTAAGTAGGTGTTAGTCTAGTACCGTATCCC
Agrostis_stolonifera					TTTAACTAC----TTA------TATTAAATTAAGTA-TTAAGTAGGTGTTAGTCTAGTACCGTATCCC
Hierochloe_odorata					TTTAACTAC----TTA------TATTAAATTAAGTATTTAAGTAGGTGTTAGTCTAGTACCGTATCTC
Torreyochloa_pallida					TTTAACTAC----TTA------TATTAAATTAAGTA-TTAAGTAGGTGTTAGTCTAGTACCGTATCCC
Phalaris_arundinacea					1TTAACTAC----TTA------TATTAAATTAAGTA-TTAAGTGGGTGTTAGTCTAGTACCGTAT
Trisetum_cernuum					TTTAACTAC----TTA------TATTCAATTAAGTATTTAAGTAGGTGTTAGTCTAG--------CCC
Avena_sativa		62 (Deletion)	13382	13443	TAT--------------------------------------------------------------CCC
Anthoxanthum_odoratum					TTTAACTAC----TTA------TATTAAATTAAGTATTTAAGTAAGTGTTAGTCTAGTACCATATCCC
Briza_maxima					TTTAACTAC----TTA------TATTAAATTAAGTA-TTAAGTAGGTGTTAGTCTAGTACCGTATCCC
Amelichloa_brachychaeta					TTTAACTAC----TTAATATATAATTAAATTTAAGTATTAATTAGATGTTAGTCTAGTACCGTATCCC
Triplachne_nitens	5	68	13520	13587	GCCGGAAAGGGCTCCGTA-AATCGGGTATTCACTGAGACAAAGAACTAGCAAACTGCTTTTAAAGGGA
Polypogon_fugax					1------------------CGTGGGGTATTCACTGAGACAAAGAACTAGCAAACTGCTGTTAAAGGGA
Koeleria_nitidula					GCCGGAAAGGGCTCCGTA-AATCGGGTATTCACTGAGACAAAGAACTCGCAAACTTCTTTTAAAGGGA
Gastridium_ventricosum					GCCGGAAAGGGCTCCGTA-AATCGGGTATTCACTGAGACAAAGAACTAGCAAACTGCTTTTAAAGGGA
Dichelachne_crinita					GCCGGAAAGGGCTCCGTA-AATCGGGTATTCACTGAGACAAAGAACTGGCAAACTGCTTTTAAAGGGA
Arrhenatherum_elatius					GCCGGAAAGGGCTCCGTA-AATCGGGTATTCACTGAGACAAAGAACTCGCAAACTTCTTTTAAAGGGA
Agrostis_gigantea					GCCGGAAAGGGCTCCGTA-AATCGGGTATTCACTGAGACAAAGAACTAGCAAACTGCTTTTAAAGGGA
Calamagrostis_breviligulata					GCCGGAAAGGGCTCCGTA-AATCGGGTATTCACTGAGACAAAGAACTAGCAAACTGCTTTTAAAGGGA
Agrostis_stolonifera					GCCGGAAAGGGCTCCGTA-AATCAGGTATTCACTGAGACAAAGAACTAGCAAACTGCTTTTAAAGGGA
Hierochloe_odorata					GCCGGAAAGGGCTCCGTA-AATCGGGTATTCACTGAGACAAAGAACTAGCAAACTGCTTTTAAAGGGA
Torreyochloa_pallida					GCCGGAAAGGGCTCCGTA-AATCGGGTATTCACTGAGACAAAGAACTGGCAAACTGCTTTTAAAGGGA
Phalaris_arundinacea					GCCGGAAAGGGCCCCGTA-AATCGGGTATTCACTGAGACAAAGAACTGGCAAACTGCTTTTAAAGGGA
Trisetum_cernuum		62 (Deletion)	13523	13584	GCC--------------------------------------------------------------GGA
Avena_sativa					GCCAGAAAGGGCTCCGTA-AATCGGGTATTCACTGAGACAAAGAACTCGCAAACTTCTTTTAAAGGGA
Anthoxanthum_odoratum					GCCGGAAAGGTTTCCGTA-AATCGAGTATTCAATGAGACAAAAAATTAGCAAACTGCTTTTAAAGGGA
Briza_maxima					GCCGGAAAGGGCTCCGTA-AATTGGGTATTCACTGAGACAAAGAACTGGCAAACTGCTTTTAAAGGTA
Amelichloa_brachychaeta					GGCGGAAAGGGCTACCTAAAATAGGGTATTCACTAAGACAAACAACTGGCAAACTGCTTTTAAAGAGA
Triplachne_nitens	6	133	14835	14967	AAGGAGGCTAATTCCCCCTTATTGAATCAGATGGAGAAGGTTCATGACACTGAGCGGTTGGTACTTCTATTTCGATCGCTGGCCTTTAC----TTTAGGATTTAGATAGCCCCTCTCCCTCTCGTCTGTAAAA
Polypogon_fugax					AAGGAGGCTAATTCCCCCTTATTAAATCAGATGGAGAAGGTTCATGACACTGAGCGGTTGGTACTTGTATTTCGATCGCCGGCCTTTAC----TTTAGGATTTAGGTAGC------CCCTCTCATCTGTAAAC
Koeleria_nitidula					AAG------------------------------------GTTCATGACACTGAGCGGTTGGTACTTCTATTTCGATCGCTGGCCTTTACTTTATTTAGGATTTAGATAGC------CACTCTCGTCTGTAAAA
Gastridium_ventricosum					AAGGAGGCTAATTCCCCCTTATTGAATCAGATGGAGAAGGTTCATGACACTGAGCGGTTGGTACTTCTATTTCGATCGCTGGCCTTTAC----TTTAGGATTTAGATAGCCCCTCTCCCTCTCGTCTGTAAAA
Dichelachne_crinita					AAGGAGGCTAATTCTCCCTTATTGAATCAGATGGAGAAGGTTCATGACACTGAGCGGTTGGTACTTCTATTTCGATCGCTGGCCTTTAC----TTTAGGATTTAGATAGC------CCCTCTCGTCTGTAAAA
Arrhenatherum_elatius					AAGGAGGCTAATTCCCCCTTATTGAATCAGATGGAGATGGTTCATGACACTGAGCGGTTGGTACTTCTATTTCGATCACTGACCTTTAC----TTTAGGATTTAGATAGT------CACTCTCGTCTGTAAAA
Agrostis_gigantea					AAGGAGGCTAATTCCCCCTTATTAAATCAGATGGAGAAGGTTCATGACACTGAGCGGTTGGTACTTGTATTTCGATCGCCGGCCTTTAC----TTTAGGATTTAGGTAGC------CCCTCTCATCTGTAAAA
Calamagrostis_breviligulata					AAGGAGGCTAATTCCCCCTTATTGAATCAGATGGAGAAGGTTCATGACACTGAGCGGTTGGTACTTCTATTTCGATCGCTGGCCTTTAC----TTTAGGATTTAGATAGC------CCCTCTCGTCTGTAAAA
Agrostis_stolonifera					AAGGAGGCTAATTCCCCCTTATTGAATCAGATGGAGAAGGTTCATGACACTGAGCGGTTGGTACTTCTATTTCGATCGCTGGCCTTTAC----TTTAGGATTTAGGTAGC------CCCTCTCGTCTGTAAAA
Hierochloe_odorata					AAGTAGGCTAATTCCCCCTTATTGAATCAGATGGAGAAGGTTCATGACACTGAGTGGTTGGTACTTCTATTTCGATCGCTGGCCTTTAC----TTTAGTATTTAGATAGC------CCCTCTCGTCTGGAAAA
Torreyochloa_pallida					AAGGAGGCTAATTTCCCCTTATTGAATCAGATGGAGAAGGTTCATGACACTGAACGATTGGTACTTCTATTTCGATCGCTGGCCTTTAC----TTTAGGATTTAGATAGC------CTCTCTCGTCTGTAAAA
Phalaris_arundinacea					AAGGGGGCTAATTCCCCCTTATTGAATCAGATGGAGAAGGTTCATGACAC---------GGTACTTCTATTTCGATCGCTGGCCTTTAC----TTTAGGATTTAGATAGC------CCCTCTCGTCTGTAAAA
Trisetum_cernuum		127 (INCORRECTLY ID'D AS ISD)	14838	14946	AAG-G------------------------------------------------------------------------------------------------------------------------------AGG
Avena_sativa					AAGGAGGCTAATTCCCCCTTATTGAATCAGATGGAGAAAGTTCATGACGCTGAACGGTTGGTACTTCTATTTTGATCGCTGGCCTTTAC----TTTAGGATTTAGATAGC------CACTCTCGTCTGTAAAA
Anthoxanthum_odoratum					AAGGAGGCTAATTCCCCCTTATTGAATCAGATGGAGAAGATTCATGACACTGAGCGGTTAGTACTTCTATTTCGATCGCTGGCCTTTAC----TTTAGGATTTAGATAGC------CCCTCTTGTCTGGAAAA
Briza_maxima					AAGGAGGCTAATT-CCCCTTATTGAATCAGATGGCAAAGGTTCATGACACTGAGCGCTTAGTACTTCCATTTCGATCGCTGTCCTTTAC----TTTAGGATTTAGACAGT------CCCTCTCGTCTGTAAAA
Amelichloa_brachychaeta					1-----------------------------------AAAGTTCATGACACTGAGCGGTTGGTACTTCTACTTGGATCGCAGGCCTTTAC----TTTAGGATTTAGATAGC------CCCTCTGGTCTGTA
Triplachne_nitens	7	76	15076	15151	CTTTGCGAG---GACGTAAGTGTGCCAGACTGCTGTAC-----GGAATACTTTTATTATTCCTACAATATACACTA
Polypogon_fugax					CTTTGCGAG---GACGTGAGTGTGTCAGACTGCTGCAC-----GGAATACTTTTATTATTCCTACAATACACACTA
Koeleria_nitidula					CTTTGCGAG---GACGTAAGTGTGCCAGACTGCTGTAC-----GGAATACTTTTATTATTCCTACAATATACACTA
Gastridium_ventricosum					CTTTGCGAG---GACGTAAGTGTGCCAGACTGCTGTAC-----GGAATACTTTTATTATTCCTACAATATACACTA
Dichelachne_crinita					CTTTGCGAG---GACATAAGTGTGCCAGACTGCTGTAC-----GGAATACTTTTATTATTCCTACAATATACACTA
Arrhenatherum_elatius					CTTTGCGAG---------------------------AC-----GGAATACTTTTATTATTCCTACAATATACACTA
Agrostis_gigantea					CTTTGCGAG---GACGTGAGTGTGTCAGACTGCTGCAC-----GGAATACTTTTATTATTCCTACAATACACACTA
Calamagrostis_breviligulata					CTTTGCGAG---GACGTAAGTGTGCCAGACTGCTGTAC-----GGAATACTTTTATTATTCCTACAATATACACTA
Agrostis_stolonifera					CTTTGCGAGGATGATGTAAGTGTGTCAGACTGCTGTAC-----GGAATACTTTTATTATTCCTACAATATACACTA
Hierochloe_odorata					CTTTGCGAG---GACGTAAGTGTGCCAGACTGCTATAC-----GGAATACTTTTATTATTCCTACAATATACACTA
Torreyochloa_pallida					CTTTGCGAG---GACGTAAGTGTGCCAGACTGCTGTAC-----GGAATACTTTTATTATTCCTACAATATACACTA
Phalaris_arundinacea					CTTTGTGAG---GACGTAAGTGTGCCAGACTGCTGTAC-----GGAATACTTTTATTATTCCTACAATATACACTA
Trisetum_cernuum		70 (Deletion)	15079	15148	CTT----------------------------------------------------------------------CTA
Avena_sativa					CTTTGCGAG---------------------------AC-----GGAATAGTTTTATTATTCCTACAATATACACTA
Anthoxanthum_odoratum					CTTTGCGAG---GGCGTAAGTGTGCCAGACTGCTGTAC-----GGAATACTTTTATTATTCCTACAATATACACTA
Briza_maxima					CTTTACGAG---GACGTAAGTGTGCCAGACTGCTGTAT-----GGAATACTTTTATTATTCCTACAATATACACTA
Amelichloa_brachychaeta					CTTTGCGAG---GACGTAAGTGTGCGAGACTGCTGTACTGAATTGAATAGTTTTATTATTCCTACAATATACACTA
Triplachne_nitens	8	354	15467	15820	CCCACTTTC--CTCTCTCTCCTTTTTTCCACTCACTCAATTCTAGTTTATTCGATTCTTGTTTAAAAGAATCAAAATAGAATTTCAAAGAATCAAA-ATAGAACTAAGAACACATAAAAAAG-AACATAGAGGATCAAGACCATTACCAAATGTTCCTTCCAAAAATCATATTGGGTAATTTAATTCT-TAGGGTTGCAGAATCCGCCTATTTTA-----CTAGTCTTCGGAAACAGAAAACCCTGAACCAAGAAGAGTTAAG-TATGTAGGGTATGG-TTTTTTTTATTGTGTCCA------CCCTTTCTTCACGTATTTTATT-----ATATA----------------AAA
Polypogon_fugax					ACCACTTTC--CTCTCTCTCTTTTTTTCCACTCACTCAATTCTAGTTTATTCGATTCTTGTTTA---------------------AAAGAATAAAA-ATAGAACTAAGAACACATAAAAAAG-AACATAGAGGATCAAGACCATTACCAAATGTTCCTTCCAAAAATCATATTGGGTAATTGAATTCT-TAGGGTTGCAGAATCCGCCTATTTTA-----CTAGTCTTCGGAAACCGAAAACCCTGAACCAAGAAGAGTTAAG-TATGTAGGGTATGGTTTTTTTTTATTATGTCCA------CTCTTTCTTCACGTATTTTATT-----ATATA----------------AAA
Koeleria_nitidula					ACCACTTTCCTCTCTCTCTCCTTTTTTCCACTCACTCAATTCTATTTTATTAGATTCTTGTTTA---------------------AAAGAATCAAA-ATAGAACTAAGAACGCATAAAAAAAGAACATAGAGGATCAAGACCATTACCAAATGTTCCTTCCACGAATCATATTGGGTAATTTAATTCT-TAGGGTTCCAGAATCCGTCTATTTTA-----CTAGTCTTCGGAAACAGAAAACCCTGAACCAGGAAGAGTTAAGTTATGTAGGATATGG-TTTTTTTTATTGTGTCCACTCTTTCTCTTTCTTCACGTATTTTATT-----ATATA----------------AAA
Gastridium_ventricosum					CCCACTTTC--CTCTCTCTCCTTTTTTCCACTCACTCAATTCTAGTTTATTCGATTCTTGTTTA---------------------AAAGAATCAAA-ATAGAACTAAGAACACATAAAAAAG-AACATAGAGGATCAAGACCATTACCAAATGTTCCTTCCTAAAATCATATTGGGTAATTGAATTCT-TAGGGTTGCAGAATCCGCCTATTTTA-----CTAGTCTTCGGAAACGGAAAACCCTGAACCAAGAAGAGTTAAG-TATGTAGGGTATGG-TTTTTTTTATTGTGTCCA------CCCTTTCTTCACGTATTTTATT-----ATATA----------------AAA
Dichelachne_crinita					ACCACTTTC--CTCTCTCTCCTTTTTTCCACTCACTCAATTCTAGTTTATTCGATTCTTGTTTA---------------------AAAGAATCAAA-ATAGAACTAAGAACACATAAAAAAG-AACATAGAGGATCAAGACCATTACCAAATGTTCCTTCCAAGAATCATATTGGGTAATTTAATTCT-TAGGGTTGCAGAATCCGCCTATTTTA-----CTAGTCTTCGGAAACAGAAAACCCTGAACCAAGAAGAGTTAAG-TATGTAGGGTATGG-TTTTTTTTATTGTGTCCA------CTCTTTCTTCACGTATTTTATT-----ATATA----------------AAA
Arrhenatherum_elatius					ACCACTTTC--CTCTATGTTCTTTTTTCCACTCACTCAATTCTATTTTATTAGATTCTTGTTTAAAAA-----------------AAAGAATCAAA-ATAGAACTAAGAACGCATAAAAAAG-AACATAGAGGATCAAGACCATTACCAAATGCTCCTTCCACGAATCATATTGGGTAATTTAATTCT-TAGGGTTCCAGAATCCGCCTATTTTA-----CTAGTCTTCAGAAACGGAAAACCCTGAACCAGGAAGAGTTCAATTATGTAGGGTATGG-TTTTTTTTATTGTGTCCA------CTCTTTCTTCACGTATTTTATT-----ATATA----------------AAA
Agrostis_gigantea					ACCACTTTC--CTCTCTCTCCTTTTTTCCACTCACTCAATTCTAGTTTATTCGATTCTTGTTTA---------------------AAAGAATAAAA-ATAGAACTAAGAACACATAAAAAAG-AACATAGAGGATCAAGACCATTACCAAATGTTCCTTCCAAAAATCATATTGGGTAATTGAATTCT-TAGGGTTGCAGAATCCCCCTATTTTA-----CTAGTCTTCGGAAACAGAAAACCCTGAACCAAGAAGAGTTAAG-TAT----GGTATGGTTTTTTTATATTGTGTCCA------CTCTTTCTTCACGTATTTTATT-----ATATA----------------AAA
Calamagrostis_breviligulata					ACCACTTTC--CTCTCTCTCCTTTTTTCCACTCACTCAATTCTAGTTTATTCGATTCTTGTTTA---------------------AAAGAATCAAA-ATAGAACTAAGAACACATAAAAAAG-AACATAGAGGATCAAGACCATTACCAAATGTTCCTTCCAAAAATCATATTGGGTAATTTAATTCT-TAGGGTTGCAGAATCCGCCTATTTTA-----CTAGTCTTCGGAAACAGAAAACCCTGAACCAAGAAGAGTTAAG-TATGTAGGGTATGGTTTTTTTTTATTGTGTCCA------CTCTTTCTTCACGTATTTTATT-----ATATA----------------AAA
Agrostis_stolonifera					ACGACTTTC--CTCTCTCTCCTTTTTTCCACTCACTCAATTCTAGTTTATTCGATTCTTGTTTA---------------------AAAGAATAAAATATAGAACTAAGAACACATAAAAAAG-AACATAGAGGATCAAGACCATTACCAAATGTTCCTTCCAAAAATCATATTGGGTAATTTAATTCT-TAGGGTTGCAGAATCCGCCTATTTTACTAGTCTAGTCTTCCGAAACAGAAAACCCTGAACCAAGAAGAGTTAAG-TATGTAGGGTATGC-TTTTTTTTATTGTGTCCA------CTCTTTCTTCACGTATTTTATT-----ATATA----------------AAA
Hierochloe_odorata					ACCACTTTC--CTCTCTCTCCTTTTTTCCACTCACTCAATTCTAGTTTATTAGATTCTTGTTTA---------------------AAAGAATCAAA-ATAGAACTAAGAACACATAAAAAAG-AACATAGAAGATCAAGAACATTACCAAATGTTCCTTCCAAGAATCATATTGGGTAATTTAATTCT-TAGGGTTCCAGAATCCGCCTATTTTA-----CTAGTCTTCGGAAACAGAAAACCCTGAACCAAGAAGAATTAAG-TATGTAGGGTATGG-TTTTTTTTATTGTGTCCA------CTCTTTCTTCACGTATTTTATT-----ATAT-----------------AAA
Torreyochloa_pallida					ACCACTTTC--CTATCTCTCCTTTTTTCCACTCACTCAATTCTAGTTTATTAAATTCTTGTTTA---------------------AAAGAATCAAA-ATAGAACTAAGAACACATAAAAAAG-AACATAGAGGATCAAGACCATTACCAAATGTTCCTTCCAAGAATCATATTGGGTAATTTAATTCTTTAGGGTTCCAGAATCTGCCTATTTTA-----CTAGTCTTCGGAAACAGAAAACCCTGAACCAAGAAGAGTTAAG-TATGTAGGGTATGG-TTTTTTTTATTATGTCCA------CTCTTTCTTCACGTATTTTATTATATAATATA----------------AAA
Phalaris_arundinacea		217 (Deletion)	15470	15686	ACC----------------------------------------------------------------------------------------------------------------------------------------------------------------------TCTTGGGTAATTTAATTCT-TAGGGTTCCAGAATCCGCCTATTTTA-----CTAGTCTTCGGAAACAGAAAACCCTGAACCAAGAAGAGTTAAG-TATGTAGGGTATGG-TTTTTTTTATTGTGTTCA------CTTTTTCTTCACGTATTTTATT-----ATATA----------------AAA
Trisetum_cernuum					ACCACTTTCCTCTCTCTCTCCTTTTTTCCACTCACTCAATTCTATTTTATTAGATTCTTGTTTA---------------------AAAGAATCAAA-ATAGAACTAAGAACGCATAAAAAAA-AACAGAGAGTATCAAGACCATTACCAAATGTTCCTTCCACGAATCATATTGGGTAATTTAATTCT-TAGGGTTCCAGAATCCGCCTATTTTA-----CTAGTCTTCGGAAACAGAAAACCCTGAACCAGGAAGAGTTAAGTTATGTAGGGTATGG-TTTTTTTTATTGTGTCCA------CTCTTTCTTCACGTATTTTATT-----ATATA----------------AAA
Avena_sativa					ACCACTTTC--CTCTCTCTCCTTTTTTCCACTCACTCAATTCTATTTTATTAGATTCTTGTTTA---------------------AAAGAATAAAA-ATAGAACTAAGAACGCATAAAAAAG-AACATAGAGTATCAAGACCATTACCAAATGTTCCTTCCACGAATCATATTGGGTAATTTAATTCT-TAGGGTTCCAGAATCCGCCTATTTTA-----CTAGTCTTCGGAAACAGAAAACCCTGAACCAGGAAGAGTTAAGTTATGTAGGGTATGGCTTTTTTTTATTGTGTCCA------CTCTTTCTTCACGTATTTTATT-----ATATA----------------AAA
Anthoxanthum_odoratum					ACCACTTTC--CTCTCTCTCCTTTTTTCCACTCACTTAATTCTAGTTTATTAGATTCTTGTTTA---------------------AAAGAATCAAA-ATAGAACTAAGAACACATAAAAAAG-AACATATAAAATCAAGAACATTACCAAATGTTCCTTCCAATAATCATATTGGGTAATTTAATTCT-TAGGGTTCCAGAATTTGACTATTTTA-----CTAGTCTTCAGAAACAGAAGACCGTGAACCAAGAAGAATTAAG-TATGTAGGGTATG--TTTTTTTTATTGTGTCCA------CTTTTTCTTCACGTATTTTATT-----ATATAAAAAATAATAAAAAATAAA
Briza_maxima					ACCACTTTC--CTCTCTCTCCTTTTTTCCACTCACTCAATTCTAGTTTATTCGATTCTTATTTA---------------------AAAGAATCAAA-ATAGAACTAAGAACACATAAAAAAG-AACATAGAGGATCAAGACCATTACCAAATGTTCCTTCCAAGAATCATATTGGGTAATTTAATTCT-TAGGGTTCCAGAATCCGACTATTTTA-----CTAGTCTTCGGAAACAGAAAACCCTGAACCAAGAAGAGTTCAG-TATGTAGGGTATGG-TTTTTTTTATTGGGTCCA------ATCTTTCTTCACGTATTTTATT-----ATATA------AAAATAAAATAAA
Amelichloa_brachychaeta		287 (Deletion)	15531	15817	ACCACTTTC--CTCTCTCTCCTTTTTTCCACTAACTCAATTCTAGTTTATTGAATTCTTGTTTA---------------------AAAGAATCAAA-ATAGAACTAAGAACACATAAAAATA-------------------------------------------------------------------------------------------------------------------------------------------------------------------------------------------------------------------------------------AAA
Triplachne_nitens	9	65	15852	15916	AGA-------------GAGAATATGAAATATTTTCTTATTTTT-------CTTAATTTTATCAAG
Polypogon_fugax					AGA-------------GAGAATATGAAATAGTTTCTTATTTTT-------CTTAATTTTCTCAAG
Koeleria_nitidula					AGA-------------GAGAATATGAAATATTTTATTATTTCTTATTTTTCTTAATTTTCTCAAT
Gastridium_ventricosum					AGA-------------GAGAATATGAAATATTTTCTTATTTTT-------CTTAATTTTATCAAG
Dichelachne_crinita					AGA-------------GAGAATATGAAATATTTTCTTATTTTT-------CTTAATTTTCTCAAG
Arrhenatherum_elatius					AAA-------------GAGAATATGAAATATTTTCTTATTTCTTATTTTTCTTAATTTTATCAAT
Agrostis_gigantea					AGA-------------GAGAATATGAAATAGTTTCTTATTTTT-------CTTAATTTTCTCAAG
Calamagrostis_breviligulata					AGA-------------GAGAATATGAAATATTTTCTTATTTTT-------CTTAATTTTCTCAAG
Agrostis_stolonifera					AGA-------------GAGAATATGAAATATTTTCTTATTTTT-------CTTAATTTTCTCAAG
Hierochloe_odorata					AGAGAGAATATGAAAAGAGAATATGAAATATTTTCTTATTTTT-------CTTAATTTTCTCAAG
Torreyochloa_pallida					AGA-------------GAGAATATGAAATATTTTCTTATTTTT-------CTTAATTTTCTCAAG
Phalaris_arundinacea					AGA-------------GAGAATATGAAATATTTTCATATTTTT-------CTTAATTTTCTCAAG
Trisetum_cernuum					AGA-------------GAGAATATGAAATATTTTCTTATTTCTTAT---------TTTTCTCAAT
Avena_sativa					AGA-------------GAGAATAGGAAATATTTTCTTATTTCTTATTTTTCTTAATTTTCTCAAT
Anthoxanthum_odoratum					AGA-------------GAGAATATGAAATATTTTCTTATTTTT-------CTTAATTTTCTCAAG
Briza_maxima					AGA-------------GAGAATATGAAATATTTTCTTATTTTT-------CTTAATTTTCTCAAG
Amelichloa_brachychaeta		59 (Deletion)	15855	15913	AGC-----------------------------------------------------------AAG
Triplachne_nitens	10	60	17343	17402	GTATGTAGCATATGATTTGTCTATTTCTTAGAGTAGGGCAGACGAATCGAATCTTCTTAT
Polypogon_fugax					GTATGTAGCATATGATTTGTCTATTTCTTAGAGTAGGGCAGACGAATCGAATCTTCTTAT
Koeleria_nitidula					GTATGTAGGATATGATTCGTCTATTTCTTAGAGTAGGGGAGACGAAGCGAATCTTCTTAT
Gastridium_ventricosum					GTATGTAGCATATGATTTGTCTATTTCTTAGAGTAGGGCAGACGAATCGAATCTTCTTAT
Dichelachne_crinita					GTATGTAGCATATGATTTGTCTATTTCTTAGAGTAGGGCAGACAAATCAAATCTTCTTAT
Arrhenatherum_elatius					GTATGTAGCATATGATTCGTCTATTTCTTAGAGTAGGGCAGACGAAGCGAATCTTCTTAT
Agrostis_gigantea					GTATGTAGCATATGATTTGTCTATTTCTTAGAGTAGGGCAGACGAATCGAATCTTCTTAT
Calamagrostis_breviligulata					GTATGTAGCATATGATTTGTCTATTTCTTAGAGTAGGGCAGACGAATCGAATCTTCTTAT
Agrostis_stolonifera		54 (Deletion)	17346	17399	GTA------------------------------------------------------TAT
Hierochloe_odorata					GTATGTAGCATATGATTCGTCTATTTCTTAGAGTAGGGCAGACGAATCGAATCTTCTTAT
Torreyochloa_pallida					GTATGTAGCATATGATTCGTCTATTTCTTAGAGTAGGGCAGACGAATCGAATCTTCTTAT
Phalaris_arundinacea					GTATGTAGCATATGATTAGTCTATTTCTTAGAGTAGGGCAGACGAATCGAATCTTCTTAT
Trisetum_cernuum					GTATGTAGCATATGATTCGTCTATTTCTTAGAGTA-GTGAGACGAAGCGAATCTTCTTAT
Avena_sativa					GTATGTAGCATATGA-------------------------------------------AT
Anthoxanthum_odoratum					GTATGTAGCATATGATTCGTCTATTTCTTAGAGTAGGGCAGACGAATCGAATCTTCTTAT
Briza_maxima					GTATGTAGCATATGATTTGTCTATTTCTTAGAGTAGGGCAGACGAATCGAATCTTCTTAT
Amelichloa_brachychaeta					GTATGTAATATATGATTCGTCTAGTTGTTAGAATAGGACAGACGAATCGAATCTTCTTAT
Triplachne_nitens	11	57	19833	19889	GGATTTATCGAGTTCGATCAGTACTA--------------T-AAACCTAAGTATTTT
Polypogon_fugax					ATATTTCTCGAGTTCGATCAGTACTA--------------T-AAACCTAAGTATTTT
Koeleria_nitidula					TAATTTCGCGAGTTCGATCAGTACTA--------------T-AAACCTAAGTATTTT
Gastridium_ventricosum					GGATTTATCGAGTTCGATCAGTACTA--------------T-AAACCTAAGTATTTT
Dichelachne_crinita					GAATTTCTCGAGTTCGATCAGTACTA--------------T-AAACCTAAGTATTTT
Arrhenatherum_elatius					GAATTTCTCGAGTTCGATCAGTACTA--------------T-AAACCTAAGTATTTT
Agrostis_gigantea					AGATTTCTCGAGTTCGATCAGTACTA--------------T-AAACCTAAGTATTTT
Calamagrostis_breviligulata					GAATTTATCGAGTTCGATCAGTACTA--------------T-AAACCTAAGTATTTT
Agrostis_stolonifera					GGATTTCTCGAGTTCGATCAGTACTATAAACCTAAGTATTT-AAACCTAAGTATTTT
Hierochloe_odorata					AAATTTCTCGAGTTCGATCAGTATTA--------------T-AAACCTAAGTATTTT
Torreyochloa_pallida					GAGTTTCTGGAGTTCGATCAGTACTA--------------T-AAACCTAAGTATTTT
Phalaris_arundinacea					GAATTTCTCGAGTTCGATCAGTACTA--------------T-AAACCTAAGTATTTT
Trisetum_cernuum					TAATTTCTCGAGTTCGATCAGTACTA--------------G-AAACCTAAGTATTTT
Avena_sativa					AAATTTATCGAGTTCGATCAGTACTA--------------TAAAACCCAAGTATTTT
Anthoxanthum_odoratum					GAATTTCTCGAGTTCGATCAGTATTA--------------T-AAACCTAAGTATTTT
Briza_maxima					GAATTTCTTGAGTTCGATCAGTACTA--------------TAAAACCTAAGTATTTT
Amelichloa_brachychaeta		51 (Deletion)	19236	19886	GAA---------------------------------------------------TTT
Triplachne_nitens	12	140	20535	20674	GAATA--AAAAA-AAAGGAAATTTGCTCTGATA-TAGAGTATAACCTGACTATCTTAGCCTATCCAACTGAAATTA-----CGATAAAATAAAAGCATGGATATGTGGAGAGGTGGATAACTAGATTGGCATGTACTTAA
Polypogon_fugax					GAAT--AAAAAA-AAGGGAAATTTGCTCTGATA-TAGAGTATAACCTGACTATCTTAGCTTATCCAAGTGAAATTA-----TGATAAAAGAAAAGCATGGATATGTGGAGAGGTGGATAACTAGATTGGCATGTACTTAA
Koeleria_nitidula					GAAT---AAAAA-TAGGGAAATTTGCTCTGATA-TAGAGTATAACCTGACTATCTTAGCCTATCCAAGTGAAATTA-----CGATAAAAGAAAAGCATGGATATGTGTAGAGGTCGATAACTAGATTGGCATATACTTAA
Gastridium_ventricosum					GAATAAAAAAAA-AAAGGAAATTTGCTCTGATA-TAGAGTATAACCTGACTATCTTAGCCTATCCAACTGAAATTA-----CGATAAAAGAAAAGCATGGATATGTCGAGAGGTGGATAACTAGATTGGCATGTACTTAA
Dichelachne_crinita					GAAT--AAAAAA-AAAGGAAATTTGCTCTGATA-TAGAGTAGAACCTGACTATCTTAGCCTATCCAAGTGAAATTG-----CGATAAAAGAAAAGCATGGATATGTGGAGAGGTGGATAACTAGATTGGCATGTACTTAA
Arrhenatherum_elatius					GAAT----AAAA-AAGGGAAATTTGCTCTGATA-TAGAGTATA----GACTATCTTAGCCTATCCAAGTGAAATTA-----CGATAAAAGAAAAGCATGGATATGTGTAGAGGTCAATAACTAGATTGGCATATACTTAA
Agrostis_gigantea					GAAT--AAAAAA-AAGGGAAATTTGCTCTGATA-TAGAGTATAACCTGACTATCTTAGCTTATCCAAGTGAAATTA-----TGATAAAAGAAAAGCATGGATATGTGGAGAGGTGGATAACTAGATTGGCATGTACTTAA
Calamagrostis_breviligulata					GAATA-AAAAAA-AAAAGAAATTTGCTCTGATA-TAGAGTATAACCTGACTATCTTAGCCTATCCAAGTGAAATTA-----CGATAAAAGAAAAGCATGGATATGTGGAGAGGTGGATAACTAGATTGGCATGTACTTAA
Agrostis_stolonifera					GAAT--AAAAAA-AAAGGAAATTTGCTCTGATA-TAGAGTATAACCTGACTATCTTAGCCTATCCAAGTGAAATTA-----TGATAAAAGAAAAGCATGAATATGTGGAGAGGTGGATAACTAGATTGGCATGTACTTAA
Hierochloe_odorata					GAAT---AAAAA-AAAGGCAATTTGCTCTGATA-TAGAGTATAACCTGACTATCTTAGACTATCCAAGTGAAATTA-----CGATAAAAGAAAAGCATGGATATGTGGAGAGGTGGATAACTAGATTGGCATGTACTTAA
Torreyochloa_pallida					GAAT--AAAAAA-AAAGGAAATTTGCTCTGATA-TAGAGTATAACCTGACTCTCTTAGCCTATCCAAGTGAAATTA-----CGATAAAAGAAAAGCATGGATATGTGGAGAGGTGGATAACTAGATTGGCATGTACTTAA
Phalaris_arundinacea					GAAT---AAAAA-AAAGGAAATTTGCTCTGATA-TAGAGTATAACCTGACTATCTTAGCCTATCCAAGTGAAATTA-----CGATAAAAGAAAAGC-TGGATATGTGGAGAGGTGGATAACTAGATTGGCATGTACTTAA
Trisetum_cernuum		134 (Deletion)	20538	20671	GAA--------------------------------------------------------------------------------------------------------------------------------------TAA
Avena_sativa		134 (Deletion)	20538	20671	GAA--------------------------------------------------------------------------------------------------------------------------------------TAA
Anthoxanthum_odoratum					GAATAAAAAAAAGAAAGGCAATTTGCTTTGATA-TAGAGTATAACCTGACTATCTTAGCCTATCCAAGTGAAA--------------------------------TGGAGAGGTGGATAACTAAATTGGCATGTACTTAA
Briza_maxima					GAAT---AAAAAAAAAAGAAATTTGCTCTGATA-TAGAGTATAACCTGACTATCTTAGCCTGTCCAAGTGAAATTAAATTCCGATAAAAGAAAAGCATGGATATGTGGAGAGGTGGATAACTAGATTGGCATGTACTTAA
Amelichloa_brachychaeta					GAAT--AAAAAAAAAAAGAAATTTGCTCTGATATTAGAGTTTAACCTGACTATCTTGCCCTGTCCAAGTGAAATTA-----CGATAAAAGAAAAGCATGGGTATGTGGAGAGGTAGATAACTAGATTGGCATGTACTTAA
Triplachne_nitens	13	101	20697	20797	GAATTCCACAATAAAATCCTAAATTTTCTAGCAATTCT------------ACTAC----ATCCGAAATAAAAAATAACCCTCAAA--TTATTTTTTGAAAT
Polypogon_fugax					GAATTCCACAATGAAATCCTAAATTTTCTAGCAATTCT------------ACTAC-----TCCGAAATAAAAAATAACCCTCAAT--TTTTTTTT---AAT
Koeleria_nitidula					GAATTTCACAAGGAAATCCTAAATTTTCTAGCAATTCT------------ACTAC-----TCCGAAATAAAAAAAAAACCTCAAA--TTATTTTTTGAGAT
Gastridium_ventricosum					GAATTCCACAATAAAATCCTAAATTTTCTAGCAATTCT------------ACTAC----ATCCGAAATAAAAAATAACCCTCAAA--TTATTTTTTGAAAT
Dichelachne_crinita					GAATTCCACAATGAAATCCTAAATTTTCTAGCAATTCT------------ACTAC-----TCCGAAATAAAAAAGAACCCTCAAA--TTATTTTTGGAAAT
Arrhenatherum_elatius					GAATTTCACAATGAAATCATAAATTTTCTAGCAATTCT------------ACTAC-----TCCGAAATAAAAAAGAACCCTCAA---TTTTTTTTTTAATT
Agrostis_gigantea					GAATTCCACAATGAAATCCTAAATTTTCTAGCAATTCT------------ACTAC-----TCCGAAATAAAAAATAACCCTCAAT--TTTTTTTT---AAT
Calamagrostis_breviligulata					GAATTCCACAATGAAATCCTAAATTTTCTAGCAATTCT------------ACTAC-----TCCGAAATAAAAAAGAACCCTCAAA--TTATTTTTTGAAAT
Agrostis_stolonifera					GAATTCCACAATGAAATCCAAAATTTTCTAGCAATTCT------------ACTAC-----TCCGAAATAAAAAATAACCCTCAAATTTTTTTTTTTGAAAT
Hierochloe_odorata					GAATTCCACAATGAAATCCTAAATTTTCTAGCAATTCT------------ACTACTCCGATCCGAAATAAAAAAGAACCCTCAAT-TTTTTTTTTTGAAAT
Torreyochloa_pallida					GAATTCCACAATGAAATCCTTTATTTTACAACAATTCTCTACTATTACGAAACAAAAAAGTACGAAACAAAAAAGAACCCTCAAT--TTTTTTTTTGAAAT
Phalaris_arundinacea					GAATTCCACAATGAAATCCTAAATTTTCTAGCAATTCT------------ACTAC-----TCCGAAATAAAAAAGAACCCTCAAT--TTTTTTTT---AAT
Trisetum_cernuum					GAATTTCACAAAGAAATCCTAAATTTTCTAGCAATTCT------------ACTAC-----TCCGAAATAAAAAAGAACCCTCAAA--TTATTTTTTGAGAT
Avena_sativa		97 (Deletion)	20699	20795	GA-------------------------------------------------------------------------------------------------AT
Anthoxanthum_odoratum					GAATTCCACAATGAAATCCTAAATTTTCTAGCAATTCT------------ACTACTCCGATCCAAAATAAAAAAGAACCCTAAAA--TTATTTTAGGAAAT
Briza_maxima					GAATTCGACAATGAAATCCTAAATTTTCTAGCAATTCT------------ACTAC-----TCCGAAATA-AAAAGAACCCTCAAA--TTATTTTTTGAAAT
Amelichloa_brachychaeta					TAATTCTACAAGGAAATCCTAAATTTTCTAGCAATTCT------------ACTAC-----TCCAAAATAAAAAAGAACCCTCAAA--TTCTTTTTTGAAAT
Triplachne_nitens	14	100	31335	31434	A-CTTAGAACACTAAGAGGTCAAATTTTATATTTTTATTTAAAATTT--------------------------AAAAAT--AAAAAAAATAAGTATTAAA
Polypogon_fugax					A-CTTAGAACACTAAGAGGTCAAATTTTAGATTTTTATTTAAAATTTTAAAATGAAAAATATTTAAAATTTTAAAATGAAAAAAAAAAATAAGTATTAAA
Koeleria_nitidula		94 (Deletion)	31338	31431	A-T----------------------------------------------------------------------------------------------AAA
Gastridium_ventricosum					A-CTTAGAACACTAAGAGGTCAAATTTTAGATTTTTATTTAAAATTT--------------------------AAAAATAAAAAAAAAATAAGTATTAAA
Dichelachne_crinita					A-CTTAGAACACTAAGAGGTCAAATTTTAGATTTTTATTTCAAATTT-------------------------------------TAAAATAAGTATTAAA
Arrhenatherum_elatius					A-CTTAGAACACTAAGAGGTCAAATTTTATATTTTTATTTAAAATTA-------------------------------------AAAAATAAGTA--AAA
Agrostis_gigantea					A-CTTAGAACACTAAGAGGTCAAATTTTAGATTTTTATTTAAAATTTTAAAATG-------------------------AAAAAAAAAATAAGTATTAAA
Calamagrostis_breviligulata					A-CTTAGAACACTAAGAGGTCAAATTTTAGATTTTTATTTAAAATTTAAAATTT------------AAAATTTAAAAATAAAAAAAAAATAAGTATTAAA
Agrostis_stolonifera					A-CTTAGAACACTAAGAGGTCAAATTTTAGATTTTTATTTAAAATTA----------------------------------AAAAAAATTAAGTATTAAA
Hierochloe_odorata					A-CTTAGAACACTAAGAGGTCAAATTTTATATTTTTATTTAAAATTT-------------------------------------AAAAATAAGTATTAAA
Torreyochloa_pallida					A-CTTAGAACACTAAGAGGTCAAATTTTATATTTTTATTGAAAATTT------------------------------------AAAAATTAAGTA--AAA
Phalaris_arundinacea					A-CTTAGAACACTAAGAGGTCAAATTTTAGATTTTTATCTCAAATTG-------------------------------------AAAAATAAGTA--AAA
Trisetum_cernuum					A-CTTAGAACACTAAGAGGTCAAATTTTATATTTTTATTTAAAATTT-------------------------------------TAAAATAAGTA--AAA
Avena_sativa					ACTTTAGAACACTAAGAGGTCAAATTTTATATTTTTATTTAAAATTT-------------------------------------TAAAATAAGTA--AAA
Anthoxanthum_odoratum					A-CTTAGAACACTAAGAAGTCAAATTTT-TATTTTTATTTAAAAATA-------------------------------------AAAAATAAGTATTAAA
Briza_maxima					A-CTTAGAACACTAAGAGGTCCAATTTTAGATTTTTATTTTAAATAA-------------------------------------AAAAATAAGTATTAAA
Amelichloa_brachychaeta					A-CTTAGAACACTAACAGGTTAAATTTTATATTTTAAT----------------------------------------------AAGGAT-------AAA
Triplachne_nitens	15	68	33519	33586	TATGGAATTATTATGGAATTGTCAAAGTATAGATGCAG-------TAA----GGAGGGTGGAGCCAGG
Polypogon_fugax					TAT-----------GGAATTGTCAAAGTATAGATGCAG-------TAA----GGAGGGTGGAGCCAGG
Koeleria_nitidula					TAT-----------GGAATTGTCAAAGTAT------AG-------TAAGGAGGGAGGGTGGAGTCAGA
Gastridium_ventricosum					TAT-----------GGAATTGTCAAAGTATAGATGCAG-------TAA----GGAGGGTGGAGCCAGG
Dichelachne_crinita					TAT-----------GGAATTGTCAAAGTATAGATGCAG-------TAA----GGAGGGTGGAGCCAGG
Arrhenatherum_elatius					TAT-----------GGAATTGTCAAAGTATAGATGCAGTTAAGGATAAGGAGGGAGGGTGGAGTCAGA
Agrostis_gigantea					TAT-----------GGAATTGTCAAAGTATAGATGCAG-------TAA----GGAGGGTGGAGCCAGG
Calamagrostis_breviligulata					TAT-----------GGAATTGTCAAAGTATAGATGCAG-------TAA----GGAGGGTGGAGCCAGG
Agrostis_stolonifera					TAT-----------GGAATTGTCAAAGTATAGATGTAG-------TAA----GGAGGGTGGAGCCAGG
Hierochloe_odorata		62 (Deletion)	33522	33583	TAT--------------------------------------------------------------GGA
Torreyochloa_pallida					TAT-----------GGAATTGTCAAAGTATAGATGCAG-------TAA----GGAGGGTGGAGTCAGG
Phalaris_arundinacea					TAT-----------GGAATTATCAAAGTATAGATACAG-------TAA----GGACGGTGGAGTCAGG
Trisetum_cernuum					TAT-----------GGAATTGTCAAAGTATAGATGCAG-------TAAGGAGGGAGGGTGGAGTCAGA
Avena_sativa					TAT-----------GGAATTGTCAAAGTATAGATGCAG-------TAAAGAGGGAGGGTGGAGTCAGA
Anthoxanthum_odoratum		62 (Deletion)	33522	33583	TAT--------------------------------------------------------------GGA
Briza_maxima					TAT-----------GGAATTGTTAAAGTATAGATGCAG-------TAA---GGAGGGGTGGAGCCAGG
Amelichloa_brachychaeta					TAT-----------GGAATTGTCAAAGTATATATGCAG-------TAA----GGAGGGTGGAATCGGG
Triplachne_nitens	16	81	46370	46450	CACTTT-CCTATTTCTCAACAATAACTTCTCTCATCAGCTATTTCGTGTTTTCAAAGTCATTAATTGTCT----CATACCC
Polypogon_fugax		75 (Deletion)	46373	46447	CAC---------------------------------------------------------------------------CCC
Koeleria_nitidula					CACTTT-CCTATTTCTCAACAATAACTTCTCTCATCAGCTATTTCGTGTTTACAAAGTCATTAATTGTTT----CATACCC
Gastridium_ventricosum					CACTTT-CCTATTTCTCAACAATAACTTCTCTCATCAGCTATTTCGTGTTTTCAAAGTCATTAATTGTCT----CATACCC
Dichelachne_crinita					CACTTT-CCTATTTCTCAACAAGAACTTCTCTCATCAGCTATTTCGTGTTTTCAAAGTCATTAATTGTCT----CATACCC
Arrhenatherum_elatius					CACTTT-CCTATTTCTCAACAATAACTTCTCTCATCAGCTATTTCGTGTTTGCAAAGTCATTAATTGTCT----GATACCC
Agrostis_gigantea					CACTTT-CCTATTTCTCAACAATAACTTCTCTCATCAGCTATTTCGTGTTTTCAAAGTCATTAATTGTCT----CATACCC
Calamagrostis_breviligulata					CACTTTACCTATTTCTCAACAATAACTTCTCTCATCAGCTATTTCGTGTTTTCAAAGTCATTAATTGTCT----CATACCC
Agrostis_stolonifera					CACTTT-CCTATTTCTCAACAATAACTTCTCTCATCAGCTATTTCGTGTTTTCAAAGTCATTAATTGTCT----CATACGC
Hierochloe_odorata					CACTTT-CCTATTTCTCAACAATAACTTCTCTCATCAGCTATTTCGTATTTTCAAAGTCATTAATTGTCT----CATACCC
Torreyochloa_pallida					CACTTT-CCTATTTCTCAACAATAACTTCTCTCATCAGCTATTTCGTGTTTTCAAAGTCATTAATTGTCT----CATACCC
Phalaris_arundinacea					CACTTT-CCTATTTCTCAACAATAACTTCTCTCATCAGCTATTTCGTGTTTTCAAAGTCATTAATTGTCT----CATACCC
Trisetum_cernuum					CACTTT-CCTATTTCTCAACAATAACTTCTCTCATCAGCTATTTCGTGTTTGCAAAGTCATTAATTGTCT----CATACCC
Avena_sativa					CACTTT-CCTATTTCTCAACAATAACTTCTCTCATCAGCTATTTTGTGTTTGCAAAGTCATTAATTGTCT----CATACCC
Anthoxanthum_odoratum					CACTTT-CCTATTTCTCACCAATAACTTCTCTCATCAGCTATTTCGTGTTTTGAAAGTAATTACTTGTCT----CATACCC
Briza_maxima					CACTTT-CCTATTTCTCAACAATAACTTCTCTCATCAGCTATTTTTTGTTTTCAAAGTCATTAATTGTCTCATACATACCC
Amelichloa_brachychaeta					CACTTT-CCTATTTCTCAACAACAACTTCTCTCATCAGCTATTTCGTGTTTTCAAAGTTATTAATTGTCT----CCTATCC
Triplachne_nitens	17	63	48451	48513	CTA---------------------------TATAGAATAGAATTG------ATTCCTATTTCT
Polypogon_fugax					CTA---------------------------TATAGAATAGAATTG------ATTCCTATTTCT
Koeleria_nitidula		57 (Deletion)	(51426) 48454	48510	CTA---------------------------------------------------------TAT
Gastridium_ventricosum					CTA---------------------------TATAGAATAGAATTG------ATTCCTATTTCT
Dichelachne_crinita					CTA---------------------------T-----ATAGAATTG------ATTCCTATTTCT
Arrhenatherum_elatius					CTA---------------------------TATAGAATAGAATTG------ATTCCTATTTCT
Agrostis_gigantea					CTA---------------------------TATAGAATAGAATTG------ATTCCTATTTCT
Calamagrostis_breviligulata					CTA---------------------------TATAGAATAGAATTG------ATTCCTATTTCT
Agrostis_stolonifera					CTA---------------------------TATAGAATAGAATTG------ATTCCTATTTCT
Hierochloe_odorata					CTA---------------------------TATAGAATAGAATTG------ATTCCTATTTCT
Torreyochloa_pallida					CTA---------------------------TATAGAATAGAATTGATTCCTATTCCTATTTCT
Phalaris_arundinacea					CTA---------------------------T-----ATAGAATTG------TTTCCTATTTCT
Trisetum_cernuum					CTATTTTTTCTATATATTCTATTTTTTCTATATAGAATAGAATTG------ATTCCTATTTCT
Avena_sativa					CTA---------------------------TATAGAATAGAATTG------ATTCCTATTTCT
Anthoxanthum_odoratum					CTA---------------------------TATAGAATAGAATTG------ATTCCTATTTCT
Briza_maxima					CTA------------------TATTTTCTATATAGAATTGATTTG------ATTCCTATTTCT
Amelichloa_brachychaeta					TCT-------------------------------ATATAGAATTG------ATTCCAATTTCT
Triplachne_nitens	18	58	48529	48586	TTCAGATATTTTCAATTTGAGATGGCTCCGACGAATAATCTAATACA--TAGAACATA
Polypogon_fugax					TTCAGATATTTTCAATTTGAGATGGCTCCGACGAATAATCTAATAC---------ATC
Koeleria_nitidula					TTCAGATATTTTCAATTTGATATGGCTCCGACGAATAATCTAATAC---------ATA
Gastridium_ventricosum					TTCAGATATTTTCAATTTGAGATGGCTCCGACGAATAATCTAATACA--TAGAACATA
Dichelachne_crinita					TTCAGATATTTTCAATTTGATATGGCTCCGACGAATAATCTAATAC---------ATA
Arrhenatherum_elatius					TTCAGATATTTTCAATTTGATATGGCTCCGACGAATAATCTAATAC---------ATA
Agrostis_gigantea					TTCAGATATTTTCAATTTGAGATGGCTCCGACGAATAATCTAATAC---------ATA
Calamagrostis_breviligulata					TTCAGATATTTTCAATTTGAGATGGCTCCGACGAATAATCTAATACA--TAGAA-ATA
Agrostis_stolonifera					TTCAGATATTTTCAATTTGAGATGGCTCCGACGAATAATCTAATAC---------ATA
Hierochloe_odorata					TTCAGATATTTTCAATTTGATATGTCTCCGACGAATAATCTAATAC---------ATA
Torreyochloa_pallida					TTCAGATATTTTCAATTTGATATGGCTCCGACGAATAATCTAATAC---------ATA
Phalaris_arundinacea					TGCAGATATTTTCAATTTGATATGGCTCCGACGAATAATCTAATAC---------ATA
Trisetum_cernuum					TTCAGATATTTTCAATTTGATATGGCTCCGACGAATAATCTAATAC---------ATA
Avena_sativa					TTCAGATATTTTCAATTTGATATGGCTCCGACGAATAATCTAATAC---------ATA
Anthoxanthum_odoratum		ISD????			TTCAGATATTTTCAATTTCATATGTCTCCAACGAATAATCTAATACATCTAATACATA
Briza_maxima		52 (Deletion)	(51504) 48532	48583	TTC----------------------------------------------------AGA
Amelichloa_brachychaeta					TTCAGATATTTTCCATTTGATATGGCTCGGACAAATAATATAATCT----AATACATA
Triplachne_nitens	19	228	49461	49688	AAACACGTATAGATACTG----ACATAGCAAACGATTAATCACAGAATGCATAT----TATAATATATGTTATTTATTCTTTTTTAG------------------------------------------------------------------------------------------------------------------------------------------GTG
Polypogon_fugax					AAACACGTATAGATACTG----ACATAGCAAACGATTAATCACAGAATGCATAT----TATAATATAGGTTCTTTATTCTTTTTTAG------------------------------------------------------------------------------------------------------------------------------------------GTG
Koeleria_nitidula		222 (Deletion)	49464	49685	AAA------------------------------------------------------------------------------------------------------------------------------------------------------------------------------------------------------------------------------GTG
Gastridium_ventricosum					AAACACGTATAGATACTG----ACATAGCAAACGATTAATCACAGAATGCATAT----TATAATATATGTTATTTATTCTTTTTTAG------------------------------------------------------------------------------------------------------------------------------------------GTG
Dichelachne_crinita					AAACACGTATAGATACTG----ACATAGCAAACGATTAATCACAGAACGCATAT----TAGAATATATGTTCTTTATTCTTTTTTAG------------------------------------------------------------------------------------------------------------------------------------------GTG
Arrhenatherum_elatius		222 (Deletion)	49464	49685	AAA------------------------------------------------------------------------------------------------------------------------------------------------------------------------------------------------------------------------------GTG
Agrostis_gigantea					AAACACGTATAGATACTG----ACATAGCAAACGATTAATCACAGAATGCATAT----TAGAATATAGGTTCTTTATTCTTTTTTAG------------------------------------------------------------------------------------------------------------------------------------------GTG
Calamagrostis_breviligulata					AAACACGTATAGATACTG----ACATAGCAAACGATTAATCACAGAATGCATAT----TATAATATAGGTTCTTTATTCTTTTTTAG------------------------------------------------------------------------------------------------------------------------------------------GTG
Agrostis_stolonifera					AAACACGTATAGATACTG----ACATAGCAAACGATTAATCACAGAATGCATATTATATATAATATGGGTTCTTTATTCTTTTTTAG------------------------------------------------------------------------------------------------------------------------------------------GTG
Hierochloe_odorata					AAACACGTATAGATACTG----ACATAGCAAACGATTAATCACAGAACGCATAT----TATAATATAGGTTCTTTATTTTTTTTTAGAATGAAA-TAGAAATGATTATG-------AAATCAAAAATTCATAATTTTTTTAGAATTATTGTGAATCCATTCCAATCGAATATTGAGTA-------ATCAAATCCTTCAATTCAAAGTTTTGAGATCTTTAAAAAAGTG
Torreyochloa_pallida					AAACACGTATAGATACTGACATACATAGCAAACGATTAATCACAGAACCCATAT----TATAATATAGGTTCTTTATTCTTTTTTAGAATGAAATTAGAAATGATTATG-------AAATAAAAAATTCTTAATTTTTTTAGAATTATTGTGAATCCATTCCAATCGAATATTGAGTA-------ATCAAATCCTTCAATTCAAAGTTTTGAGATCTTTAAAAAAGTG
Phalaris_arundinacea		91 (Insert)	49548	49638	AAACACGTATAGATACTGACATACATAGCAAACGATTAATAACAGAACCCATAT----TATAATATAGGTTCTTTATTCTTTTTTAGAATGAAATTAGAAATAGAAATGATTATGAAATAAAAAATTCTGAATTTTTTTTAGAATTATTGTGAATCCATTCCAATCGAATATTGAGTA-------ATCAAATCCTTCAATTCAAAGTTTTGAGATCTTTAAAAAAGTG
Trisetum_cernuum		222 (Deletion)	49464	49685	AAA------------------------------------------------------------------------------------------------------------------------------------------------------------------------------------------------------------------------------GTG
Avena_sativa		222 (Deletion)	49464	49685	AAA------------------------------------------------------------------------------------------------------------------------------------------------------------------------------------------------------------------------------GTG
Anthoxanthum_odoratum					AAACACGTATAGATACTG----ACATAGCAAACGATTAATCACAGAACGCATAT----TATAATATGGGTTCTTTATTCTTTTTTAGAATGAAATTAGAAATAGAAATGATTATG-AAATAAAAAATTCAGAATTTGTTTAGAATTATTTGGAATGCATTCCAATCAAATATTAAGTA-------ATCAAATCCTTCAATTCAAAGTTTTGATATCTTTAAAAAAATG
Briza_maxima					AAACACGTATAGATACTG----ACATAGCAAACGATTAATCAAAGAACGCATAT----TATAATATAGTTTCTTTATTCTTTTTTAG------------------------------------------------------------------------------------------------------------------------------------------GTG
Amelichloa_brachychaeta		138 (Insert)	49548	49685	AAACACGTATAGATACTG----ACATAGCAAACGATTAATCACAGAACCTGTAT----TATAATATACGTTCTTTATTCTTTTTTAGAATGAAAGTTGAACATAGAACTGATTATTAAATAAAAAATTCTGAATTTTTTTAGAATTATTGTGAATTCATTGGAATTGAATATTCAATATTTAGCAATCAAATCCTTCAATTCAAAGTTTTGAGGTCTTTAAAAAAGTG
Triplachne_nitens	20	88	50651	50438	ATAATATAAATAGAGTA-----TGATTTATTCATCTAAGTGGATAAGTCTAT-------------AA-TATAGAAGCACTTCTTTTTC
Polypogon_fugax					ATAATATAAATAGAGTA-----TGATTTATTCATCTAAGTGGATAAGTCTATAATATA------TAA-TATAGAAGCACTTCTTTTTC
Koeleria_nitidula					ATAATATAAATAGAGTATAGTATGATTTATTCATCTAAGTGGATAAGTCTATAA--------------TCTAGAAGCACTTCTTTTTC
Gastridium_ventricosum					ATAATATAAATAGAGTA-----TGATTTATTCATCTAAGTGGATAAGTCTAT-------------AA-TATAGAAGCACTTCTTTTTC
Dichelachne_crinita					ATAATATAAATAGAGTA-----TGATTTATTCATCTAAGTGGATAAGTCTAT-------------AA-TATAGAAGCACTTCTTTTTC
Arrhenatherum_elatius					ATAATATAAATAGAGTATAGTAGGATTTATTCATCTAAGTGGATAAGTCTATAA--------------TCTAGAAGCACTTTTTTTTC
Agrostis_gigantea					ATAATATAAATAGAGTA-----TGATTTATTCATCTAAGTGGATAAGTCTATAATATA------TAA-TATAGAAGCACTTCTTTTTC
Calamagrostis_breviligulata					ATAATATAAATAGAGTA-----TGATTTATTCATCTAAGTGGATAAGTCTATAATATA------GAA-TATAGAAGCACTTCTTTTTC
Agrostis_stolonifera					ATAATATAAATAGAGTA-----TGATTTATTCATCTAAGTGAATTAGTCTAT-------------AA-TATAGAAGCACTTCTTTTTC
Hierochloe_odorata					ATAATATAAATAGAGTA-----TGATTTATTCATCTAAGTGGATAAGTCTATAATCTA------TAATTATAGAAGCACTTCTTTTTC
Torreyochloa_pallida		82 (Deletion)	50354	50435	ATA----------------------------------------------------------------------------------TTC
Phalaris_arundinacea					ATAATATAAATAAAGTA-----TGATTTATTCATCTAAGTGGATAAGTCTATAA--------------TATAGAAGCAC------TTC
Trisetum_cernuum					ATAATATAAATAGAGTATAGTATGATTTATTCATCTAAGTGGATAAGTCTATAA--------------TCTAGAAGCACTTCTTTTTC
Avena_sativa					ATAATATAAATAGAGTATAGTATGATTTATTCATCTAAGTGGATAAGTCTATAA--------------TCTAGAAGCACTTCTTTTTC
Anthoxanthum_odoratum					ATAATATAAATAGAGTA-----TGATTTATTCATCTAAGTGGATAAGTCTATAA--------------TATAGAAGCACTTCTTTTTC
Briza_maxima					ATAATATAAATAGAGTA-----TGATTTATTCATCTAAGTGGATAAGTCTATAA--------------TATAGAAGCACTTC------
Amelichloa_brachychaeta					ATAATATAAATAGAGTA-----TGATTTATTCATCTAAGTGGATAAGTCTATAATATAATAAAGAAAATAAGGAAGCACTTC------
Triplachne_nitens	21	63	53483	53545	TTGATGGAGGACGGGATTCAAATCAGGGAAGGGATCCTTCCTTCTATTGATTTGATAGAAATT
Polypogon_fugax					TTGATGGAGGACGGGATTCAAATCAGGGAAGGGATCCTTCCTTCTATTGATTTGATAGAAATT
Koeleria_nitidula					TTGATGGAGGACGGGATTCAAATCAGGGAAGGGATCCTTCCTTCT---------ATAGAAATT
Gastridium_ventricosum					TTGATGGAGGACGGGATTCAAATCAGGGAAGGGATCCTTCCTTCTATTGATTTGATAGAAATT
Dichelachne_crinita					TTGATGGAGGACGGGATTCAAATAAGGGAAGGGATCCTTCCTTCTATTGATTTGATAGAAATT
Arrhenatherum_elatius					TTGATGGAGGAGGGGATTCAAATCAGGGAGGGGATCCTTCCTTCTATTGATTTGATAGAAATT
Agrostis_gigantea					TTGATGGAGGACGGGATTCAAATCAGGGAAGGGATCCTTCCTTCTATTGATTTGATAGAAATT
Calamagrostis_breviligulata					TTGATGGAGGACGGGATTCAAATCAGGGAAGGGATCCTTCCTTCTATTGATTTGATAGAAATT
Agrostis_stolonifera					TTGATGGAGAACGGGATTCAAATCAGGGAAGGGATCCTTCCTTCTATTGATTTGATAGAAATT
Hierochloe_odorata					TTGATGGAGGACGGGATTCAAATCAGGGAAGGGATCCTTCCTTCTATTGATTTGATAGAAATT
Torreyochloa_pallida					TTGATGGAGGACGGGATTCAAATCAGGGAAGGGATCCTTCCTTCTATTGATTTGATAGAAATT
Phalaris_arundinacea		57 (Deletion)	53486	53542	TTG---------------------------------------------------------CTT
Trisetum_cernuum					TTGATGGAGGACGGGATTCAAATCAGGGAAGGGATCCTTCCCTCT---------ATAGAAATT
Avena_sativa					TTGATGGAGGACGGGATTCCAATCAGGGAAGGGATCCTTCCTTCTATTGATTTGATAGAAATT
Anthoxanthum_odoratum					TTGATGGAGGACGGGATTCAAATCAGGGGAGGGATCCTTCCTTCTATTGATTTGATAGAAATT
Briza_maxima					TTGATGGAGGACGGGATTCAAATCAGGGAAGGGATCCTTCCTTCTATTGATTTGATAGAAATT
Amelichloa_brachychaeta					TTGAAGGAGGACGGGATTCAAATCAGGGAAGGGATCCTTCTTTCTATTAATTTGATAGAAATT
Triplachne_nitens	22	90	53638	53727	TATGTCGCAGGCGCTCGTCCAGTCTAGAAACAAGCACTAATGAGAAAATGAAAACTATACTAAAGAAAACCTAGGATATCTATCCAAAAA
Polypogon_fugax					TATGTCGCAGGCGCTCGTCCAGTCTAGAAACAAGCACTAATGAAAAAATGAAAACTATACTAAAGAAAACCTAGGATATCTATCCAAAAA
Koeleria_nitidula					TATGTCGCAGGCGCCCATCCAGTCTAGAAACAAGCACTAATGAGAAAAAGAAAACTGTACTAAAGAAAACCTAGGATATCCATCC-AAAA
Gastridium_ventricosum					TATGTCGCAGGCGCTCGTCCAGTCTAGAAACAAGCACTAATGAGAAAATGAAAACTATACTAAAGAAAACCTAGGATATCTATCCAAAAA
Dichelachne_crinita					TATGTCGCAGGCGCTCGTCCAGTCTAGAAACAAGCACTAATGAGAAAATGCAAACTATACTAAAGAAAACCTAGGATATCTATCCAAAAA
Arrhenatherum_elatius					TATGTCGCAGGCGCCCATCCAGTCTAGAAACAAGCACTAATGAGAAAAAGAAAACTCTACTAAAGAAAACCTGGGATATCTATCCAAAAT
Agrostis_gigantea					TATGTCGCAGGCGCTCGTCCAGTCTAGAAACAAGCATTAATGAAAAAATGAAAACTATACTAAAGAAAAACTAGGATATCTATCCAAAAA
Calamagrostis_breviligulata					TATGTCGCAGGCGCTCGTCCAGTCTAGAAACAAGCACTAATGAGAAAATGAAAACTAT-----AGAAAACCTAGGATATCTATCCAAAAA
Agrostis_stolonifera					TATGTCGCAGGTGCTCGTCCAGTCTAGAAACAAGCACTAATGAGAAAATGAAAACTATACTAAAGAAAACCTAGGATATCTATCCAAAAA
Hierochloe_odorata					TATGTCGCAGGCGCCCGTCCAGTCTAGAAACAAGCACTAATGAGAAAATGAAAACTATACTAAAGAAAACCTAGGATATCTATCCAAAAA
Torreyochloa_pallida					TATGTCGCAGGCGCCCATCCAGTCTAGAAACAAGCACTAATGAGAAAATGAAAACTATACTAAAGAAAACCTAGGATATCTATTCAAAAA
Phalaris_arundinacea					TATATCGCAGGCGCCCACCCAGTCTAGAAACAAGCACTAATGAGAAAATGAAAACTATACTAAAGAAAACCTAGGATATCTATCCAAAAA
Trisetum_cernuum					TATGTCGCAGGCGCCCATCCAGTTTAGAAACAAGCACTAATGAGAAAAAGAAAACTGTACTAAAGAAAACCTAGGATATCTATCCAAAAA
Avena_sativa					TATGTCGCAGGCGCCCATCCAGTCTAGAAACAAGCACTAATGAGAAAAAGAAAACTGTACTAAAGAAAACCTAGGATATCTATCC-AAAA
Anthoxanthum_odoratum					TATGTCGTAGGCGCCCGTTCAGTCTAGAAACAAGCACTAATGAGAAAATGAAAACTATACTAAATAAAACTTAGGATATCTATCCAAAAA
Briza_maxima					TATGTCGCAGGCGCTCGTCCAGTCTAGAAACAAGCACTAATGAGAAAATGAAAACTATACTAAAGAAAACCTAGGATATCTATTCAAAAA
Amelichloa_brachychaeta		84 (Deletion)	53641	53724	TAT------------------------------------------------------------------------------------AAA
Triplachne_nitens	23	815	59262	60076	TACAATAAAGAAATACAAATCCAATTCAAATATTATCATATGATAATGGAATCAAATACGCAGTATTTACAGAAAAAAGCCTTCGTTT----------AATCAATATACTTTTAATGTCGAATCGGGATTCACTAAGACAGAAATCAAGCATTGGGTCGAACTCTTCTTTGGTGTTAAGGTAGTAGCTGTGAATAGCCATCGACTACCTGGAAAGGGTAGAAGAATAGGACCTATTCTGGGACATACAATGCATTACAGACGTATGATCATTATCCTTCAACCGGGTTATTCTATTCCACTTCTAGATAGAGAAAAAAACTAAAGGAGAATGAATGAAAAAAGACATA-----GTTTTGAAGTTAGA-CCCTTTTATTTTATAAGACTCTCTTGCAAAA…
Polypogon_fugax					TACAATAAAGAAATACAAATCCAATTCA-----TATCATATGATAATGGAATCAAATACGTAGTATTTACAGAAAAAAGCCTTCGTTTATTGGGAAAGAATCAATATACTTTTAATGTCGAATCGGGATTCACTAAGACAGAAATCAAGCATTGGGTCGAACTCTTCTTTGGTGTTAAGGTAGTAGCTGTGAATAGCCATCGACTACCTGGAAAGGGTAGAAGAATAGGACCTATTCTGGGACATACAATGCATTACAGACGTATGATCATTACCCTTCAACCGGGTTATTCTATTCCACTTCTAGATAGAGAAAAAAACTAAAGGAGAATGAATGAAAAAAGACATA-----GTTTTGAAGTTAGA-CCCTTTTATTTTATAAGAATCTCTTGCAAAA…
Koeleria_nitidula		60 (Deletion); 82(Deletion)	59451; 59720	59510; 59801	TACAATAAAGAAATACAAATCAAATTCAAATATTATCATATGATAATGGAATCAAATACGCAGTATTTACAGAAAAAAGTCTTCATTTATTGGAAAAGAATCAATATACTTTTAATGTCGAATCGGGATTCACTAAGATAGAAATCAAGCATTGGGTCGAACTCTTCTTTGGTGTTAAGGTAGTAGCTG------------------------------------------------------------TGCATTACAGACGTATGATCATTACCCCTCAACCGGGTTATTCTATTCCACTTCTAGATAGAGAAAAAAACTAAAGGAGAATGAATGAAAAAAGGCATA-----GTTTTGAAGTTATA-CCCTTTTATTTTATAAGACTCTCTTGAAAAA…
Gastridium_ventricosum					TACAATAAAGAAATACAAATCCAATTCAAATATTATCATATGATAATGGAATCAAATACGCAGTATTTACAGAAAAAAGCCTTCGTTTATTGGGAAAGAATCAATATACTTTTAATGTCGAATCGGGATTCACTAAGACAGAAATCAAGCATTGGGTCGAACTCTTCTTTGGTGTTAAGGTAGTAGCTGTGAATAGCCATCGACTACCTGGAAAGGGTAGAAGAATAGGACCTATTCTGGGACATACAATGCATTACAGACGTATGATCATTACCCTTCAACCGGGTTATTCTATTCCACTTCTAGATAGAGAAAAAAACTAAAGGAGAATGAATGAAAAAAGACATA-----GTTTTGAAGTTAGA-CCCTTTTATTTTATAAGACTCTCTTGCAAAA…
Dichelachne_crinita					TACAATAAAGAAATACAAATCAAATTCAAATATTATCATATGATAATGGAATCAAATACGCAGTATTTACAGAAAAAAGTCTTCGTTTATTGGGAAAGAATCAATATACTTTTAATGTCGAATCGGGATTCACTAAGACAGAAATCAAGCATTGGGTCGAACTCTTCTTTGGTGTTAAGGTAGTAGCTGTGAATAGCCATCGACTACCTGGAAAGGGTAGAAGAATAGGACCTATTCTGGGACATACAATGCATTACAGACGTATGATCATTACCCTTCAACCGGGTTATTCTATTCCACTTCTAGATAGAGAAAAAAACTAAAGGAGAATGAATGAAAAAAGACATA-----GTTTTGAAGTTAGA-CCCTTTTATTTTATAAGACTCTCTTGCAAAA…
Arrhenatherum_elatius					TACAATAAAGAAATACAAATCAAATTCAAATATTATCATATGATAATGGAATCAAATACGCAGTATTTACAGAAAAAAGTCTTCGTTTATTGGGAAAGAATCAATATACTTTTAATGTCGAATCGGGATTCACTAAGACAGAAATCAAGCATTGGGTCGAACTCTTCTTTGGTGTTAAGGTAGTAGCTGTGAATAGCCATCGACTACCTGGAAAGGGTAGAAGAATAGGACCTATTCTGGGACATACAATGCATTACAGACGTATGATCATTACCCTTCAACCGGGTTATTCTATTCCACTTCTAGATAGAGAAAAAAACTAAAGGAGAATGAATGAAAAAAGACATC-----GTTTTGAAGTTATACCCCTTTTATTTTATAAGACTCTCTTGCAAAA…
Agrostis_gigantea					TACAATAAAGAAATACAAATCCAATTCA-----TATCATATGATAATGGAATCAAATACGCAGTATTTACAGAAAAAAGCCTTCGTTTATTGGGAAAGAATCAATATACTTTTAATGTCGAATCGGGATTCACTAAGACAGAAATCAAGCATTGGGTCGAACTCTTCTTTGGTGTTAAGGTAGTAGCTGTGAATAGCCATCGACTACCTGGAAAGGGTAGAAGAATAGGACCTATTCTGGGACATACAATGCATTACAGACGTATGATCATTACCCTTCAACCGGGTTATTCTATTCCACTTCTAGATAGAGAAAAAAACTAAAGGAGAATGAATGAAAAAAGACATA-----GTTTTGAAGTTAGA-CCCTTTTATTTTATAAGAATCTCTTGCAAAA…
Calamagrostis_breviligulata		58 (Deletion)	59652	59709	TACAATAAAGAAATACAAATCCAATTCAAATATTATCATATGATAATGGAATCAAATACGCAGTATTTACAGAAAAAAGCCTTCGTTTATTGGGAAAGAATCAATATACTTTTAATGTCGAATCGGGATTCACTAAGACAGAAATCAAGCATTGGGTCGAACTCTTCTTTGGTGTTAAGGTAGTAGCTGTGAATAGCCATCGACTACCCGGAAAGGGTAGAAGAATGGGACCTATTCTGGGACATACAATGCATTACAGACGTATGATCATTACCCTTCAACCGGGTTATTCTATTCCACTTCTAGATAGAGAAAAAAACTAAAGGAGAATGAATGAAAAAAGACATA-----GTTTTGAAGTTAGA-CCCTTTTATTTTATAAGACTCT---------…
Agrostis_stolonifera					TACAATAAAGAAATACAAATCCAATTCA-----TATCATATGATAATGGAATCAAATACGCAGTATTTACAGAAAAAAGCCTTCGTTTATTGGGAAAGAATCAATATACTTTTAATGTCGAATCGGGATTCACTAAGACAGAAATCAAGCATTGGGTCGAACTCTTCTTTGGTGTTAAGGTAGTAGCTGTGAATAGCCATCGACTGCCTGGAAAGGGTAGAAGAATAGGACCTATTCTGGGACATACAATGCATTACAGACGTATGATCATTATCCTTCAACCGGGTTATTCTATTCCACTTCTAGATAGAGAAAAAAACTAAAGGAGAATGAATGAAAAAAGACATAGTTTTGTTTTGAAGTTAGA-CCCTTTTATTTTATAAGACTCTCTTGCAAAA…
Hierochloe_odorata					TAC-------------------AATTCAAATATTATCATATGACAATGGAATCAAATACGCAGTATTTACAGAAAAAAGTCTTCGTTTATTGGGAAAGAATCAATATACTTTTAATGTCGAATCGGGATTCACTAAGACAGAAATCAAGCATTGGGTCGAACTCTTCTTTGGTGTTAAGGTAGTAGCTGTGAATAGCCATCGACTACCTGGAAAGGGTAGAAGAATAGGACCTATTCTGGGACATACAATGCATTACAGACGTATGATCATTACCCTTCAACCGGGTTATTCTATTCCACTTCTAGATAGAGAAAAAAACTAAAGGAGAATGAATGAAAAAAGACATA-----GTTTTGAAGTTAGA-CCCTTTTATTTTATAAGACTCTCTTGCAAAA…
Torreyochloa_pallida					TACAATAAAGAAATACAAATCAAATTCAAATATTATCATATGATAATGGAATCAAATACGCAGTATTTACAAAAAAAAATCTTCGTTTATTGGGAAAGAATCAATATACTTTTAATGCCAAATCGGGATTCACTAAGACAGAAATCAAGCATTGGGTTGAACTCTTCTTTGGTGTTAAGGTAGTAGCTGTGAATAGCCATCGACTACCTGGAAAGGGTAGAAGAATAGGACCTATTCTGGGACATACAATGCATTACAGACGTATGATCATTACCCTTCAACCGGGTTATTCTATTCCACTTCTAGATAGAGAAAAAAACTAAAGGAGAATGAATGAAAAAAGACATA-----GTTTTGAAGTTAGA-CCCTTTTATTTTATAAGACTCTCTTGCAAAA…
Phalaris_arundinacea					TACAATAAAGAAATACAAATCAAATTCAAATATTATCATATGATAATGGAATCAAATACGCAGTATTTACAGAAAAAAGTCTTCGTTTATTGGGAAAGAATCAATATACTTTTAATGTCGAATCGGGATTCACTAAGACAGAAATCAAGCATTGGGTCGAACTCTTCTTTGGTGTTAAGGTAGTAGCTGTGAATAGCCATCGACTACCTGGAAAAGGTAGAAGAATAGGACCTATTCTGGGACATACAATGCATTACAGACGTATGATCATTACCCTTCAACCGGGTTATTCTATTCCACTTCTAGATAGAGAAAAAAACTAAAGGAGAATGAATGAAAAAAGACATA-----GTTTTGAAGTTAGA-CCCTCTTATTTTATAAGACTCTCTTGCAAAA…
Trisetum_cernuum					TACAATAAAGAAATACAAATCAAATTCAAATATTATCATACGATAATGGAATCAAATACGCAGTATTTACAGAAAAAAGTCTTCGTTTATTGGGAAAGAATCAATATACTTTTAATGTCGAATCGGGATTCACTAAGACAGAAATCAAGCATTGGGTCGAACTCTTCTTTGGTGTTAAGGTAGTAGCTGTGAATAGCCATCGACTACCTGGAAAGGGTAGAAGAATAGGACCTATTCTGGGACATACAATGCATTACAGACGTATGATCATTACCCTTCAACCGGGTTATTCTATTCCACTTCTAGATAGAGAAAAAAACTAAAGGAGAATGAATGAAAAAAGACATA-----GTTTTGAAGTTATA-CCCTTTTATTTTATAAGACTCTCTTGCAAAA…
Avena_sativa					TACAATAAAGAAATACAAATCAAATTCAAATATTATCATATGATAATGGAATTAAATACGCAGTATTTACAGAAAAAAGTCTTCGTTTATTGGGAAAGAATCAATATACTTTTAATGTCGAATCGGGATTCACTAAGACAGAAATCAAGCATTGGGTCGAACTCTTCTTTGGTGTTAAGGTAGTAGCTGTGAATAGCCATCGACTACCTGGAAAGGGTAGAAGAATAGGACCTATTCTGGGACATACAATGCATTACAGACGTATGATCATTACCCTTCAACCGGGTTATTCTATTCCACTTCTAGATAGAGAAAAAAACTAAAGGAAAATGAATGAAAAAAGACATA-----GTTTTGAAGTTATA-CCCTTTTATTTTATAAGACTCTCTTGCAAAA…
Anthoxanthum_odoratum		722 (Deletion)	59335	60056	TAC-------------------AATTCAAATTCTATCATATGACAATGGAATCAAATACGCAGTATTTACAGA--------------------------------------------------------------------------------------------------------------------------------------------------------------------------------------------------------------------------------------------------------------------------------------------------------------------------------------…
Briza_maxima		81 (Deletion)	59993	60073	TACAATAAAGAAATACAAATCCAATTTAAATATTATCATATGATAATGGAATCAAATACGCAGTATTTACAGAAAAAAGTCTTCGTTTATTGGGAAAGAATCAATATACTTTTAATGTCGAATCGGGATTCACTAAGACAGAAATCAAGCATTGGGTCGAACTCTTCTTTGGTGTTAAGGTAGTAGCTGTGAATAGCCATCGACTACCTGGAAAGGGTAGAAGAATAGGACCTATTCTGGGACATACAATGCATTACAGACGTATGATCATTACCCTTCAACCGGGTTATTCTATTCCACTTCTAGATAGAGAAAAAAACTAAAGGAGAATGAATGAAAAAAGACATA-----GTTTTGAAGTTAGA-CCCTTTTATTTTGTAAGACTCTCTTGCAAAA…
Amelichloa_brachychaeta		785 (Deletion--with slight interruption)	59272	60056	TACAATAAAG----------------------------------------------------------------------------------------------------------------------------------------------------------------------------------------------------------------------------------------------------------------------------------------------------------------------------------------AAAAAAAATA---------------------------------------------------…
Triplachne_nitens	24	71	60598	60668	TTTACAAAAGATTTTTTATAGAAGACTAAAGTCTTCTATAAAAAATCTTTATTTTGCAAACTAAAAAATAC
Polypogon_fugax		66 (Deletion)	60600	60665	TT------------------------------------------------------------------TAC
Koeleria_nitidula					TTTACAAAATA-TTTT-----------------------------------TTTTGTAAACTAAAAAATAC
Gastridium_ventricosum					TTTACAAAAGATTTTTTATAGAAGACT---TTATTCTATAAAAAATCTTTATTTTGCAAACTAAAAAATAC
Dichelachne_crinita					TTTACAAAAGATTTTTTATAGAATACTAAAGTATTCTATAAAAAATCTTTATTTTGCAAACTCAAAAATAC
Arrhenatherum_elatius					TTTACAAAATATTTT------------------------------------TTTTGCAAACTCAAAAATAC
Agrostis_gigantea		66 (Deletion)	60600	60665	TT------------------------------------------------------------------TAC
Calamagrostis_breviligulata					TTTACAAAAGATTTTTTATAGAAGACTAAAGTCTTCTATAAAAAATCTTTATTTTGCAAACTAAAAAATAC
Agrostis_stolonifera		66 (Deletion)	60600	60665	TT------------------------------------------------------------------TAC
Hierochloe_odorata					TTTACAAAAGATTTTTTATAGAATACTTTAGTATTCTATAAAAAATCTTTATTTTGCAAACTCAAAAATAC
Torreyochloa_pallida					TTTACAAAAGACTTTTTATAGAATACTAAAGTATTCTATAAAAAATCTTTATTTTGCAAACTAAAAAATAC
Phalaris_arundinacea					TTTACAAAAGATTT---------------------------------TTTATTTTGCAAACTAAAAAATAC
Trisetum_cernuum					TTTACAAAATA-TTTT-----------------------------------TTTTGCAAACTAAAAAATAC
Avena_sativa					TTTACAAAATATTTTT-----------------------------------TTTTGCAAACTCAAAAATAC
Anthoxanthum_odoratum					TCGGCAAAAGATTTTTTATAGAATACTAAAGTATTCTATAAAAAATCTTTATTTTGCAAACTCAAAAATAC
Briza_maxima					TTTACAAAAGATTTTTTC---------------------------------TTTTGCAAACTAAAAAATAC
Amelichloa_brachychaeta					TT-ACAAAATATTTTTTATAGAATACTAAAGTATTCTATAAAAAATATTTATTTTGCAAACTAAAAAATAC
Triplachne_nitens	25	375	61806	62180	TGTATT---TTTTTTTTGAACTTACTTGAATGAAGAAGAATTGGAAGAAGAGAAGCTTTCTCAACATGGGGAGGAAGTCCCTTCGAAATTGGATT--------TGTTATTGTAAGGTTATTTTTTAGTATTTATCTAAAGGAAGTAACAAATGCGGATAAGAGAAAATTGTTTTTAATTTATTTTGTCCAAGTGAGATATATCGCATACTA----TTCTTCCATTTTCACCCGAAAGGTC-TTTTTTTTATTCTATTTCACTATTCTACTCCATCTAGATCTAAGAAAGAACCCAATGCAATGAAATTCCACT-AATATATAAAAAAGAAGAATAGATACAGGGTATCAAACCTTGC----TATAGAG----TTT
Polypogon_fugax					TGTA------TTTTTTTTAACTTAATTGAATGAAGAAGAATTGGAAGAAGAGAAGCTTTCTCAACATGGGGAGGAAGTCCCTTCGAAATTGGATT--------TGTTATTGTAAGGGTATTTTTTAGTATTTATCTAAAGGAAGTAAGAAATGCGGATAAGAGAAAATTGTTTTTAATTTATTTTGTCCAAGTGAGATATATCGCCTACTA----TTCTTCCATTTTCACCCGAAAGGTC-TTTTTTTTATTCTATTTCACTATTCCACTCCATCTAGATCTAAGAAAGAACCCAATGCAATGAAATTGCACT-AATATATAAAAAAGAAGAATAGATACAGGGTATCAAACTTTGC----TATAGAG----TTT
Koeleria_nitidula					TGTATTTATTTTTTTTTGAACTGAATTGAATGAAGAAGAATTGGAAGAAGAAAAGCTTTCTCAACATGGGGAGGAAGTCCCTTCGAAATTGGATT--------TGTTATTGGAAGGATATTTTTGAGTATTTATCTAAAGGAAGGAACAAATGCGGATAAGAGAAAATTTTTTTAAATTTATTTTGTCCAAGTGAGATATATCGCATACTA----TTCTTCCATTTTCATTCGAAAGGTC-TTTTTTTTATTCTATTTCACTATTCCACTCCATCTAGATCTAAGAAAGAACCCAATGCAATTAAATTCCACT-AATATATAAAAAAGAAGAATAGATAGAGGGTATCAAACCTTGC----TATAGAG----TTT
Gastridium_ventricosum					TGTA-T---TTTTTTTTGAACTTACTTGAATGAAGAAGAATTGGAAGAAGAGAAGCTTTCTCAACATGGGGAGGAAGTCCCTTCGAAATTGGATT--------TGTTATTGTAAGGTTATTTTTTAGTATTTATCTAAAGGAAGTAACAAATGCGGATAAGAGAAAATTGTTTTTAATTTATTTTGTCCAAGTGAGATATATCGCATACTA----TTCTTCCATTTTCACCCGAAAGGTC-TTTTTTTTATTCTATTTCACTATTCTACTCCATCTAGATCTAAGAAAGAACCCAATGCAATGAAATTCCACT-AATATATAAAAAAGAAGAATAGATACAGGGTATCAAACCTTGC----TATAGAG----TTT
Dichelachne_crinita		406 (Deletion)	61819	62224	TGTA-T---TTTT-----------------------------------------------------------------------------------------------------------------------------------------------------------------------------------------------------------------------------------------------------------------------------------------------------------------------------------------------------------------------TTT
Arrhenatherum_elatius					TGTA-TTTTTTTTTTTTGAACTGAGTTGAATGAAGAAGAATTGGAAGAAGAAAAGCTTTTTCAACATGGGGAGGAAGTCCCTTCGAAATTGGATT--------TGTTATCGGAAGGGTATTTTTTAGTATTTATCTAAAGGAAGGAACAAATGCGGATAAGAG-AAATTTTTTTTAATTTATTTTGTCCAAGTGAGATATATCGCATACTATTATTTCTTCCATTTTCATTCGAAAGGTC-TTTTTTTTATTCTATTTCACTATTCCACTCCATCTAGATCTAAAAAAGAACCCAATGCAATTAAATTCCACT-AATATATAAAAAGGAAGAATAGATACAGGGTATCAAACCTTGC----TATAGAG----TTT
Agrostis_gigantea					TGTA-T---TTTTTTTTTAACTTAATTGAATGAAGAAGAATTGGAAGATGAGAAGCTTTCTCAACATGGGGAGGAAGTCCCTTCGAAATTGGATT--------TGTTATTGTAAGGGTATTTTTTAGTATTTATCTAAAGGAAGTAACAAATGCGGATAAGAGAAAATTGTTTTTAATTTATTTTGGCCAAGTGAGATATATCGCATACTA----TTCTTCCATTTTCACCCGAAAGGTC-TTTTTTTTATTCTATTTCACTATTCCACTCCATCTAGATCTAAGAAAGAACCCAATGCAATGAAATTGCACT-AATATATAAAAAAGAAGAATAGATACAGGGTATCAAACCTTGC----TATAGAG----TTT
Calamagrostis_breviligulata					TGTA-T---TTTTTTTTGAACTTAATTGAATGAAGAAGAATTGGAAGAAGAGAAGCTTTCTCAACATGGGGAGGAAGTCCCTTCGAAATTGGATT--------TGTTATTGTAAGGGTATTTTTGAGTATTTATCTAAAGGAAGTAACAAATGCGGATAAGAGAAAATTGTTTTTAATTTATTTTGTCCAAGTGAGATATATCGCATACTA----TTCTTCCATTTTCACCCGAAGGGTC-TTTTTTTTATTCTATTTCACTATTCCACTCCATCTAGATCTAAGAAAGAACCCAATGCAATGAAATTCCACT-AATATATAAAAAAGAAGAATAGATACAGGGTATCAAACCTTGC----TATAGAG----TTT
Agrostis_stolonifera					TGTA-----TTTTTTTTGAACTTAATTGAATGAAGAAGAATTGGAAGAAGAGAAGCTTTCTCAACATGGGGAGGAAGTCCCTTCGAAATTGGATT--------TGTTATTGTAAGGGTATTTTTTAGTATTTATCTAAAGCAAGTAACAAATGCGGATAAGAGAAAATTTTTTTTAATTTATTTTGTCCAAGTGAGATATATCGCATACTA----TTCTTCCATTTTCACCCGAAAGGTC-TTTTTTTTATTCTATTTCACTATTCCACTCCATCTAGATCTAAGAAAGAACCCAATGCAATGAAATTCCACT-AATATATAAAAAAGAAGAATAGATACAGGGTATCAAACCCTGC----TATAGAG----TTT
Hierochloe_odorata					TGTA-----TTTTTTTTGAACTTAATTGAATGAAGAAGAATTGGAAGAAGAGAAGCTTTCTCAACATGGGGAGGAAGTCCCTTCGAAATTGGATT--------TGTTATTGTAAGGGTATTCTTGAGTATTTATCTAAAGGAAGGAACAAATGCGGATAAGATAAAATTGTTTTTAATTTATTTTGTCCAAGTGAGATATATCGCATACTA----TTCTTCCATTTTCACCCGAAAGGTC-TTTTTTTTATTCTATTTCACTATTCCACTCCATCTAGATCTAAGAAAGAACCCAATGCAATGAAATTCCAC-------ATAAAAAAGAAGAATAGATACAGGGTCTCAAACCTTGC----TATAGAG----TTT
Torreyochloa_pallida		234 (Deletion)	61810	62043	TGTA------------------------------------------------------------------------------------------------------------------------------------------------------------------------------------------------------------------------------------------TT-TTTTTTTTATTCTATTTCACTATTCCACTCCATCTAGATCTAAGAAAGAACCCAATGCAATGAAATTCCACT-AATATATAAAAAAGAAGAATAGATACAGGGTGTCAAACCTTGC----TATAGAA----TTT
Phalaris_arundinacea		234 (Deletion)	61810	62043	TGTA-----------------------------------------------------------------------------------------------------------------------------------------------------------------------------------------------------------------------------------------TTT-TTTTTTTTATTCTATTTCACTATTCCACTCCATCTAGATCTAAGAAAGAACCCAATGCAATGAAATTCCGCT-AATATATAAAAAAGAAGAATAGATACAGGGTATCAAACCTTGC----TATAGAGTTTTTTT
Trisetum_cernuum					TGTA-----TTTTTTTTTAACTGAATTGAATGAAGAAGAATTGGAAGAAGAAAAGCTTTCTCAACATGGGGAGGAAGTCCCTTCGAAATTGGATT--------TGTTATTGGAAGGGTATTTTTGAGTATTTATCTAAAGGAAGGAACAAATGCGGATAAGAGAAAATTTTTTTTAATTTATTTTGTCCAAGTGAGATATATCGCATACTA----TTCTTCCATTTTCATTCGAAAGGTC-TTTTTTTTATTCTATTTCACTATTCCATTCCATCTAGATCTAAGAAAGAACCCAATGCAATTAAATTCCACT-AATATATAAAAAAGAAGAATAGATAGAGGGTATCAAACCTTGC----TATAGAG----TTT
Avena_sativa					TGTATGTA-TTTTTTTTGAACTGAATTGAATGAAGAAGAATTGGAAGAAGAAAAGCTTTCTCAACATGGGAAAGAAGTCCTTTCGAAATTGGATT--------TGTTATCGGAAGGGTATTTTTGAGTATTTATCTAAAGGAAGGAACAAATGCGGATAAGAGAAAATTTTTTTTAATTTATTTTGTCCAAGTGAGATATATCGCATACTA----TTCTTCCATTTTCATTCGAAAGGTCTTTTTTTTTATTCTATTTCACTATTCCACTCCATCTAGATCTAAGAAGGAACCCAATGCAATTAAATTCCACG-AATATATAAAAAAGAAGAATAGATACAGGGTATCAAACCTTGC----TATAGAG----TTT
Anthoxanthum_odoratum					TGTATT---TTTTTTTTTAACTTAATTGAATGAAGAAGAATTGGAAGAAGAGAAGCTTTCCCAACATGGGGAGGAAGTCCCTTCGAAATTGGATT--------TGTTATTGTAAGGGTATTCTTGAGTATTTATCTAAAGGAAGGAACAAATGCGGATAAGAGAAAATTATTTTTAATTCATTTTGTCCAAGTGAGATATATCACATACTA----TTCTTCCATTTTCACCCGAAAGGTC-TTTTTTTTATTCTATTTCACTATTCCACTACATCTAGATCTAAGAAAGAACGCAATGCAATGAAATTCCAC-------ATAAAAAAGAAGAATAGATACAGGGTCTCAAACCTTGCTTGCTATAGAG----TTT
Briza_maxima		73 (Deletion)	61948	62020	TGTAT----TTTTTTTTAACTTAAATTGAATGAAAAAGAATTGGAAGAAGAGAAGCTTTCTCAACATGGGGAGGAAGCCCCTCCGAAATTGGATT--------TGTTATTGTAAGGGTATTTTTTAGTATTTATCGAAAAGG-------------------------------------------------------------------------TCTTT---------------------TTTTTTTTATTCTATTTCCCTATTCCACTCCATCTAGATCTAAGAAAGAACCCAATGCAATGAAATTCCACT-AATATATAAAAAAGAAGAATAGATACAGGGTATCAAATCTTGC----TATAGAG----TTT
Amelichloa_brachychaeta					T-----------TTTTTGAACTGAATTGAATGAAGAATAATTGGAAGAAGAAAAGTTTTCTCAACACAGGGAGGAAGTCCCCTCGAAATTAGATTTGTTATTGTGTTATTGTAAGGATATTTTTGAGTATTTATCTAAAGGAAGGAACAAATGAGGATAAGAGAAAATTGTTTTTAATTTATTTTGTGCAAGTGAGATATATCCCATACTATTCTTTCTTCCATTTTCATCCGAAAGGTC-TTTTTTTTATTCTATTTCACTATTCCACTCCATCTAGATCTAAGAAAGAACCCAATG-----AAATTCCACTAAATATACAAAAAAGAAGAATAGATACAGGGTATCAAACCTTGC----TATAGAG----TTT
Triplachne_nitens	26	154	64288	64441	TCC-TTTTTTTGTTTAGACTGTTTTTTGT------------------TTATGAAATGTCTGGAATTCCTCATTTCTATCTCATGCA-AAAGAAGAGAATCGAATCCA----------AGGCAAAGGCGAGAACAATAAAAGGATTTCTTCCTTT
Polypogon_fugax					TCC-TTTTTTTGTTTAGACTGTTTTTTGT------------------TTACGAAATGTCTGGAATTCCTCATTTCTATCTCATGCA-AAAGAAGCGAATCGAATCCA----------AGGCAAAGGCGAGAACAATAAAAGGATTTCTTCCTTT
Koeleria_nitidula					TCC-TTTTATTGTTCTCGCCTTTACCT----------------------------TGGATTCGATTCTATTCTTTTGCATGAGATA-GAAATGAGGAATTCCAGACATTTCGTAAACAAAAAAAAGTCTAAACAAAAAAAGGATTTCTTCCTTT
Gastridium_ventricosum					TCC-TTTTTTTGTTTAGACTGTTTTTTGT------------------TTATGAAATGTCTGGAATTCCTCATTTCTATCTCATGCA-AAAGAAGAGAATCGAATCCA----------AGGCAAAGGCGAGAACAATAAAAGGATTTCTTCCTTT
Dichelachne_crinita					TCC-TTTTTTTGTTTAGACTGTTTTTTGT------------------TTACGAAATGTCTGGAATTCCTCATTTCTGTCTCATGCA-AAAGAAGAGAATCGAATCCA----------AGGCAAAGGCGAGAACAATAAAAGGATTTCTTCCTTT
Arrhenatherum_elatius					TCC-TTTTTTTGTTTAGACTTTTTTTTGT------------------TTACGAAATGTCTGGAATTCCTCATTTCTATCTCATGCA-AAAGAAGAGAATCGAATCCA----------AGGTAAAGGTGCCAACAATAAAAGGATTTCTTCCTTT
Agrostis_gigantea					TCC-TTTTTTTGTTTAGACTGTTTTTTGT------------------TTACGAAATGTCTGGAATTCCTCATTTCTATCTCATGCATAAAGAAGCGAATCGAATCCA----------AGGCAAAGGCGAGAACAATAAAAGGATTTCTTCCTTT
Calamagrostis_breviligulata					TCC-TTTTTTTGTTTAGACTGTTTTTTGT------------------TTACGAAATGTCTGGAATTCCTCATTTCTATCTCATGCA-AAAGAAGAGAATCGAATCCA----------AGGCAAAGGCGAGAACAATAAAAGGATTTCTTCCTTT
Agrostis_stolonifera					TCC-TTTTTTTGTTTAGCCTTTTTTTTGT------------------TTACGAAATGTCTGGAATTCCTCATTTCTATCTCATGCA-AAAGAAGCGAATCGAATCCA----------AGGCAAAGGCGAGAACAATAAAAGGATTTCTTCCTTT
Hierochloe_odorata					TCCTTTTTTTTGTTTAGACTGTTTTTTGT------------------TTACGAAATGTCTGGAATTCCTCATTTCTATCTCATGCA-AAAGAAGAGAATCGAATCCA----------AGGCAAAGGCGAGAACAATAAAAGGATTTCTTCCTTT
Torreyochloa_pallida					TCC-TTTTTTTGTTTAGACTGTTTTTTGT------------------TTACGAAATGTCTGGAATTCCTCATTTCTATCTCATGCA-AAAGAAGAGAATCGAATCCA----------AGGCAAAGGCGAGAACAATAAAAGGATTTCTTCCTTT
Phalaris_arundinacea		148 (Deletion)	64291	64438	TCC----------------------------------------------------------------------------------------------------------------------------------------------------TTT
Trisetum_cernuum					TCC-TTTTTTTGTTTAGACTTTTTTTTGT------------------TTACGAAATGTCTGGAATTCCTCATTTCTATCTCATGCA-AAAGAAGAGAATCGAATCCA----------AGGTAAAGGCGAGAACAATAAAAAGATTTCTTCCTTT
Avena_sativa		148 (Deletion	64289	64436	T----------------------------------------------------------------------------------------------------------------------------------------------------CCTTT
Anthoxanthum_odoratum					TCTTTTTTTTTGTTTAGACTGTTTTTTGT------------------TTACGAAATGTCTGGAATTCCTCATTTCTATTTCATGCA-AAAGAAAAGAATAGAATCCA----------AGGCAAAGGCGAGAACAATAAAAGGATTTCTTCCTTT
Briza_maxima					TCC-TTTTTTTGTTTAGACTTTTTTTTGT------------------TTACTAAATGTCTGGAATTCCTCATTTCTATCTCATGCA------AAAGAATCGAATCCA----------AGGCAAGAACAATAACAATAAAAGGATTTCTTCCTTT
Amelichloa_brachychaeta					TCC-TTTTTTTGTTTAAACTGTTTTTTGTTTACGAGATCTTTTTTGCTTACGAGATGTCTGTAATTCCTCATTTCTATCTCATGCA-AAAGAAGAGAATCGAATCCA---------------AAGGCGAGAACAATAAAAGGATTTCTTCCTTT
Triplachne_nitens	27	276	66444	66719	TAGTTAGCATAATATCTAATAAATAGAAAATCGAATAGTAGATAATCCATTATAAAAGAAGGAATAAATTCT------------------------TTGACGAATGAAGATTCGTAATTAATCCTTGTCTTGTTTGTTGTATTAGGTCTAACTTTCTTGACCAAACCGCGAGCGTGGAAGTTTATGAGATGAAATAGGGAAAGACAGAAGATAGAACT----AAAAAGGATAATTCAAGTGACTCGTCTTCGAATCTACTTTGGTTGGAGTTCAAA
Polypogon_fugax					TAGTTAGCATAATATCTAATAAATAGAAAATCAAATAGTAGATAATCTTTTATAAAAGAAAGAATAAATTATTTTAGG------------------TTTAGGAATGAAGATTCGTAATTAATCCTTGTCTTGTTTGTTGGATTAGGTCTCACTTTCTTGACCAAACCGCGAGCGTGGAAGTTTATGAGATGAAATAGGGAAAGAGAGAAGATAGAACT----AAAAAGGATAATTCAAGTGACTCGTCTTCGAATCTACTTTAGTTGGAGTTCAAA
Koeleria_nitidula		81 (Deletion)	66479	66559	TGG--AATAAATTCTTTGAAGAATTAAGATTCGTA---------------------------------------------------------------------------------ATTAATCCTTGTCTTGTTTGTTGGATTAGGTCTAACTTTCTTGACCAAACTGCGAACGTGGAAGTTTATGAGATGAAATAGGGAAAGACAGACGATAGAACT----TAAAAGGATAATTGAAGTGACTCGTCTTCGAATCTACTTTGGTTGGAGTTCAAA
Gastridium_ventricosum					TAGTTAGCATAATATCTAATAAATAGAAAATCGAATAGTAGATAATCCATTATAAAAGATGGAATAAATTCT------------------------TTGACGAATGAAGATTCGTAATTAATCCTTGTCTTGTTTGTTGTATTAGGTCTAACTTTCTTGACCAAACCGCGAGCGTGGAAGTTTATGAGATGAAATAGGGAAAGACAGAAGATAGAACT----AAAAAGGATAATTCAAGTGACTCGTCTTCGAATCTACTTTGGTTGGAGTTCAAA
Dichelachne_crinita					TAGTTAGCATAATATCTAATAAATAGAAAATCGAATAGTAGATAATCCATTAAAAAAGAAGGAATCAATTCT------------------------TTGAAGAATCAAGATTCGTAATTAATCCTTGTCTTGTTTGTTGGATTAGGTCTAACTTTCTTGACCAAACCGCGAGCGTGGAAGTTTATGAGATGAAATAGGGAAAGACAGAAGATAGAACT----TAAAAGGATAATTGAAGTGACTCGTCTTTGAATATACTTTGGTTGGAGTTCAAA
Arrhenatherum_elatius		81 (Deletion)	66479	66559	TGG--AATAAATTCTTTGAAGAATCAAGATTTGTA---------------------------------------------------------------------------------ATTAATCCTTGTCTTGTTTGTTGGATTAGGTATAACTTTCTTGACCAAACTGCGAGCGTGGAAGTTTATGAGATGAAATAGGGAAAGACAGAAGATAGAACTTAAATAAAAGGATAATTGAAGTAACTCGTCTTCGAATCTACTTTGGTTGGAGTTCAAA
Agrostis_gigantea					TAGTTAGCATAATATCTAATAAATAGAAAATCGAATAGTAGATAATTTTTTATAAAAGAAAAAATAAATTATTTTAGG------------------TTTAGGAAAGAAGATTCGTAATTAATCCTTGTCTTGTTTGTTGGATTAGGTCTCACTTTCTTGACCAAACCACGAGCGTGGAAGTTTATGAGATGAAATAGGGAAAGACAGAAGATAGAACT----AAAAAAGATAATTCAAGTGACTCGTCTTCGAATCCACTTTAGTTGGAGTTCAAA
Calamagrostis_breviligulata					TAGTTAGCATAATATCTAATAAATAGAAAATCGAATAGTAGATAATCCATTAAAAAAGAAGGAATAAATTCT------------------------TTTAGGAATGAAGATTCGTAATTAATCCTTGTCTTGTTTGTTGGATTAGGTCTAACTTTCTTGACCAAACCGCGAGCGTGGAAGTTTATGAGATGAAATAGGGAAAGACAGAAGATAGAACT----AAAAAGGATAATTCAAGTGACTCGTCTTCGAATCTACTTTGGTTGGAGTTCAAA
Agrostis_stolonifera					TAGTTAGCATAATATCTAATAAATAGAAAATCGAATAGTAGATAATCCATTATAAAAGAAGGAATAAATTAT------------------------TTTACGAATGAAGATTCGTAATTAATCCTTGTCTTGTTTGTTGGATTAGGTCTCACTTTCTTGACCAAACCGCGAGCGTGGAAGTTTATGAGATGAAATAGGGAAAGACAGAAGATAGAACT----AAAAAGGATAATTCAAGTGAGTCGTCTTAGAATCTACTTTAGTTGGAGTTCAAA
Hierochloe_odorata		220 (Deletion)	66497	66716	TAGTTAGCATAATATCTAATAAATAGAAAATCAAATAGTAGATAATCCATTAT----------------------------------------------------------------------------------------------------------------------------------------------------------------------------------------------------------------------------AAA
Torreyochloa_pallida		220 (Deletion)	66497	66716	TAGTTAGCATAATATCTAATAAATAGAAAATCAAATATTAGATAATCTATTAT---------------------------------------------------------------------------------------------------------------------------------------------------------------------------------------------------------------------------TTAG
Phalaris_arundinacea		220 (Deletion)	66497	66716	TAGTTAGCATAATATCTAATAAATAGAAAATCGAATAGTGGATAATCCATTATA---------------------------------------------------------------------------------------------------------------------------------------------------------------------------------------------------------------------------AAA
Trisetum_cernuum		81 (Deletion)	66479	66559	TGG--AATAAATTCTTTGAAGAATTAAGATTCGTA---------------------------------------------------------------------------------ATTAATCCTTGTCTTGTTTGTTGGATTAGGTCTAACTTTCTTGACCAAACTGCGAACGTGGAAGTTTATGAGATGAAATAGGGAAAGACAGAAGATAGAACT----TAAAAGGATAATTGAAGTGACTCGTCTTCGAATCTACTTTGGTTGGAGTTCAAA
Avena_sativa		81 (Deletion)	66479	66559	TGG--AATAAATTCTTTGAAGAATCAAGATTCAGA---------------------------------------------------------------------------------ATTAATCCTTGTCTTGTTTGTTGGATTAGGTCTAACTTTCTTGACCAAACTGCGAGCGTGGAAGTTTATGAGATGAAATAGGGAAAGACAGAAGATAGAACTTAAATAAAAGGATAATTGAAGTGACTCGTCTTCGAATCTACTGTGGTTGGAGTTCAAA
Anthoxanthum_odoratum		218 (Deletion	66499	66716	TAG-----------------------------------TAGATAATCCATTATAA--------------------------------------------------------------------------------------------------------------------------------------------------------------------------------------------------------------------------AAA
Briza_maxima					TAGTTAGCATAATATCTAATAAATAGAAAATCCAATAGTAGATAACCCATTATAAAAAATAGTAGATAACCCATTATAAAAAAATGAATAAATTCTTTGAAGAGTCAAGATTCGTAATTAATCCTTGTCTTGTTTGTTGGATTAGGTCTAACTTTTTTGACCAAACTGCGAGCGTGGAAGTTTATGCGATGAAATAGGGAAAGACAGAAGATATAACT----TAAAAGGATAATTGAAGTGACTCGTCTTCGAATCTACTTTGGTTGGAGTTCAAA
Amelichloa_brachychaeta					TAGTTAGCATAATATCTAATAAATAGA-------ATAGTAGATAATCTGGTATAAAAGAGGGAAAACATTCT------------------------TTGAAGAATCAAGATTCGTAATTAATCCTTGTCTTGTTTGTTGGATTAGGTCTAACTTTCTTGAACAAACT-------TGGAACTTTACGAGATGAAATAGGGAAAGACAGAAGATAGAACT----TAAAAGGATAATTGAAGTGACTCGCCTTCGAATCCACTTTGGTTGGAGTTCGAA
Triplachne_nitens	28	264	66745	67008	CAAGGAAGAGTTTTCTTTTTTTTTAAGGGTCCCTC----GGGGGGGTCGTGGAATGCTTTTCTTCTCCTCTTATCCCGTATGGAATACAATAAGTGAAAATAAGACAGTTAAAATAAG--------AAGTGAATAGTGGA-------ATATTTGATCATTCACTGC--AAAAAGAAGGTCGTATTGAAAAAGAAATAATCCAAAATTCAATTGTTTA-TTTTTTTTTGCAAATTCAATTGTTTTGTTTATTTATCTCTTATTCC
Polypogon_fugax		63 (Deletion)	66943	67005	CAAGGAAGAGTTTTC--TTTTTTTTAAGGTCCCTCGGGGGGGGGGGTCGTGGAATGCTTTTCTTCTCCTCTTATTCCATATGGAATACAATAAGTTAAAATAAGACAGTTAAAATAAG--------AAGTGAATAGTGGA-------ATATTTGACCGTTCACTGC--AAAAAGAAGGTCCTATTGAAAAAGAAATAA---------------------------------------------------------------TCC
Koeleria_nitidula		ISD			CAAGGAAGAGCTTTA--TTTTTTTAAGGGGCCCTC----GGGGGGGTCGTGGAATGCTTTTCTTCTCCTCTTATTCCATATGGAATACAATTAGTTAAAATAAGACAGTTAAAATAAG--------AAG-GAATAGTGGA-------ATATTTGACCGTTCACTCC--AAAAAGAGGGTCATATTGAAAAAGAAATAATCCAAAATAGAA--AACA-TTTTTTTTTTTCAAATTCAA-----TTGTTTACTTATCTCTTATTCC
Gastridium_ventricosum					CAAGGAAGAGTTTTCTTTTTTTTTAAGGGTCCCTC---GGGGGGGGTCGTGGAATGCTTTTCTTCTCCTCTTATCCCGTATGGAATACAATAAGTTAAAATAAGACAGTTAAAATAAG--------AAGTGAATAGTGGA-------ATATTTGACCGTTCACTGC--AAAAAGAAGGTCGTATTGAAAAAGAAATAATCCAAAATTCAATTGTTTA-TTTTTTTTTGCAAATTCAATTGTTTTGTTTATTTATCTCTTATTCC
Dichelachne_crinita					CAAGGAAGAGTTTTA-TTTTTTTTAAGGGTCCCTCGGGGGGGGGGGTCGTGGAATGCTTTTCTTCTCCTCTTATTCCATATGGAATACAATAAGTTAAAATAAGACAGTTAAAATAAG--------AAG-GAATAGTGGA-------ATATTTGACCGTTCACTGC--AAAAAGAAGGTCCTATTGAAAAAGAAATAATCCAAAATAGAA---AGCATTTTTTTTTTTCAAATTCAA-----TTGTTTATTTATCTCTTATTCC
Arrhenatherum_elatius					CAAGGAAGAGCTTTA-TTTTTTTTAAGAGGGCCTC----GGGGGGGTCGTGGAATGCTTTTCTTCTCCTCTTATTCCATATGGAATACAATTAGTTAAAATAAGACAGTTAAAATAAG--------AAG-GAATAGTGGA-------ATATTTGACCATTCACTCC--AAAAAGAGGGTCCTGTTGAAAAAGAAAGAATCCAAAATAGAA-------AACATTTTTTTTTAATTCAA-----TTGTTTATTTATCTCTTATTCC
Agrostis_gigantea					CAAGGAAGAGTTTTC--TTTTTTTTAAGGTCCCTCGGGGGGGGGGGTCGTGGAATGCTTTTCTTCTCCTCTTATTCCATATGGAATACAATAAGTTAAAATAAGACAGTTAAAATAAG--------AAGTGAATAGTGGA-------ATATTTGACCGTTCACTGC--AAAAAGAAGGTCCTATTGAAAAAGAAATAATCCAAAATTCAA--------------------------------TTGTTTAGTTATCTCTTATTCC
Calamagrostis_breviligulata					CAAGGAAGAGTTTTC-TTTTTTTTAAGGGTCCCTC----GGGGGGGTCGTGGAATGCTTTTCTTCTCCTCTTATTCCATATGGAATACAATAAGTTAAAATAAGACAGTTAAAATAAG--------AAG-GAATAGTGGA-------ATATTTGACCGTTCACTGC--AAAAAGAAGGTCCTATTGAAAAAGAAATAATCCAAAATTCAATTGTTTATTTTTTTTTTTCAAATTCAA-----TTGTTTATTTATCTCTTATTCC
Agrostis_stolonifera					CAAGGAAGAGTTTTC--TTTTTTTTAAGGTCCCTC--GGGGGGGGGTCGCGGAATGCTTTTCTTCTCCTCTTATTCCATATGGAATACAATAAGTTAAAATAAGACAGTTAAAATAAG--------AAGTGAATAGTGGA-------ATATTTGACCGTTCACTCC--AAAAAGAAGGTCCTATTGAAAAAGAAATAATCCAAAATTCAA--------------------------------TTGTTTATTTATCTCTTATTCC
Hierochloe_odorata					CAAGGAAGAGTT-----TTTTTTTCAAATTCAATTGTTTGGGGGGGTCGTGGAATGCTTTTCTTCTCCTCTTATTCCATATGGAATACAATAAGTTAAAATAAGACAGTTAAAATAAG--------AAG-GAATAATGGA-------ATATTTGACCGTTCACTCC--AAAAAGAAGGTCCTATTGAAAAAGAAATAATCCAAAATAGAA--AGCATTTTTTTTTTTTCAAATTCAA-----TTGTTTATTTATTTCTTATTCC
Torreyochloa_pallida		157 (Deletion)	66830	66986	CAAGGAAGAGCTTTC-TTTTTTTTAAAGGTCATTT------------------------------TTTTTTTTTTTCAAATGCAA-------------------------------------------------------------------------------------------------------------------------------------------------------------TTGTTTATTTATCTCTTATTCC
Phalaris_arundinacea					CAAGGAAGAGCTTTCTTTTTTTTTAAGGGTCCCTCGGGGGGGGGGGTCGTGGAATGCTTTTCTTCTCCTCTTATTCCATATGGAATACAATCAGTTAAAATAAGACAGTTAAAATAAG--------AAG-GAATAGTGGA-------ATATTTGACCGTTCACTCC--AAAAAGAGGGTCCTATTGAAAAAGAAATAATCCAAAATAGAA----AGCATTTTTTTTTTCAAATGCAA-----TTGTTTATTTATCTCTTATTCC
Trisetum_cernuum					CAAGGAAGAGCTT----TTTTTTTAAGGGGCCCTC----GGGGGGGTCGTGGAATGCTTTTCTTCTCCTCTTATTCCATATGGAATACAATTAGTTAAAATAAGACAGTTAAAATAAG--------AAG-GAATAGTGGA-------ATATTTGACCGTTCACTCC--AAAAAGAGGGTCCTATTGAAAAAGAAATAATCCAAAATAGAA--AACA-TTTTTTTTTTTCAAATTCAA-----TTGTTTATTTATCTCTTATTCC
Avena_sativa					CAAGGAAGAGCTTTA-TTTTTTTTAAGGGGCCCTC---AGGGGGGGTCCTGGAATGCTTTTCTTCTCCTCTTATTCCATATGGAATACAATTAGTTAAAATAAGACAGTTAAAATAAGAAGGAATAAAG-GAATAGTGGA-------ATATTTGACCGTTCACTCC--AAAAAGAGGGTCCTATTGAAAAAGAAATAATCCAAAATACAA--AACATTTTTTTTTTTTCAAATTCAA-----TTGTTTATTTATCTCTTATTCC
Anthoxanthum_odoratum		208 (Deletion)	66760	66967	CAAGGAAGAGTTTTT----------------------------------------------------------------------------------------------------------------------------------------------------------------------------------------------------------------TTTTTCAAATTCAA-----TTGTTTATTTATCTCTTATTCC
Briza_maxima		239 (Deletion)	66748	66986	CAA-----------------------------------------------------------------------------------------------------------------------------------------------------------------------------------------------------------------------------------------------TTGTTTATTTATTTATTATTCC
Amelichloa_brachychaeta					CAAGGAAGAGCTTTCTTTTTTTTTTAAGGGTCCCC-----AGGGGGTCGTGGAATGCTTTTCTTCTCCTCTTATTCCATATGGAATACAACCAGTTAAAATAAGACAGTTAAAATAAG--------AAG-GAATAGGGGAATATTTGATATTTGACCGTTCACTCCAAAAAAAAAGGGTCCTATTGAAAAAGAAATAATCCAAAATAGAA-----AGAAGTTTTTTTTCAAATTCAA-----TTGTTTATTTATCTCTTATTCC
Triplachne_nitens	29	99	68729	68827	TTTGACCCTTTTCAATCC------TTTTATTTAGTATCGGAAGG-AAAAAGAAAGAAAAGATGGATTGGGTTGAACCTCAGAGTCATGAAAAATTTGGT
Polypogon_fugax					TTTGACCCTTTTCAATCC------TTTTATTTAGTATCGGAAGG-AAAAAGAAAGAAAAGATGGATTGGGTTGAACCTCAGAATCATGAAAAATTGGAT
Koeleria_nitidula					TTTGACCCTTTTGAATCC------TTTTATTTAGTATCGGAAGG-AAAAAGAAAGAAAAGATGGATTGGGTTAAACCTCAGAGTCATG-----------
Gastridium_ventricosum					TTTGACCCTTTTCAATCC------TTTTATTTAGTATCGGAAGG-AAAAAGAAAGAAAAGATGGATTGGGTTGAACCTCAGAGTCATGAAAAATTGGGT
Dichelachne_crinita					TTTGACCCTTTTCAATCC------TTTTATTTAGTATCGGAAGG-AAAAAGAAAGAAAAGATGGATTGGGTTGAACCTCAGAGTCATGAAAAATTTGGT
Arrhenatherum_elatius					TTGGACCCTTTTGAATCC------TTTTTTTTAGTATCGGAAGG-AAAAATAAAGAAAAGATGGATTGGGTTGAACCTCAGAGTCATGAAAAATTTGGT
Agrostis_gigantea					TTTGACCCTTTTCAATCC------TTTTATTTAGTATCGGAAGG-AAAAAGAAAGAAAAGATGGATTGGGTTGAACCTCAGAGTCATGAAAAATTGGGT
Calamagrostis_breviligulata					TTTGACCCTTTTCAATCC------TTTTATTTAGTATCGGAAGG-AAAAAGAAAGAAAAGATGGATTGGGTTGAACCTCAGAGTCATGAAAAATTTGGT
Agrostis_stolonifera					TTTGACCCTTTTCAATCC------TTTTATTTAGTATCGGAAGG-AAAAAGAAAGAAAAGATGGATTGGGTTGAACCTCAGAGTCATGAAAAATTAGGT
Hierochloe_odorata					TTTGACCCTTTTCAATCC------TTTTATTTAGTATCGGAAGG-AAAAAGAAA---------GATTGGGTTGAACCTCAGAGTCATGAAAAATTTGGT
Torreyochloa_pallida					TTGGACCCTTTTAAATCC------TTTTATTTAGTATCGGAAGG-AAAAAGAAAGAAAAGATGGATTGGGTTGAACCTCAGAGTCATGAAAAATTTGGT
Phalaris_arundinacea		93 (Deletion)	68732	68824	TTT---------------------------------------------------------------------------------------------GGT
Trisetum_cernuum					TTTGACCCTTTTTAATCC------TTTTATTTAGTATCGGAAGGAAAAAAAAAAGAAAAGATGGATTGGGTTGAACCTCAGAGTCATGAAAAATTTGGT
Avena_sativa					TTTGACCCTTTTTAATCC------TTTTATTTAGTATCGGAAGG-AAAAAGAAAGAAAAGATGGATTGGCTTGAACCTCAGAGTTATGAAAAATTTGGT
Anthoxanthum_odoratum					TTTGACCCTTTTCAACCC------TTTTATTTAGTATCGGAAGG-AAAAAGAAAGAAAAGATGGATTGGGTTGAACCTCAGAGTCATGAAAAATTTGGT
Briza_maxima					TTAGACCCTTTTCAATCCTTTTATTTTTATTTAGTATCGTAAGG-AAAAAGAAAGAAAAGATGCATTGGGTTGAACCTCAGAGTCATGAAAAATTTGGT
Amelichloa_brachychaeta					TTTGACCCTTTTCAATCC------GTTTATTTAGTATTGGAAGG-AAAAAGAAAGAAAAGATGGATTGGGTGGAACCTCAGAGTCATGAAAAATTTGGT
Triplachne_nitens	30	205	82502	82706	TAAATAATAGAAAAAGTTAGGTTTTTTT--TATTTAATTTGAATATTGAATTTGTTAAAATAGAAAAAT-----ATATAGTC----AAG---------------------AAAGAAGATCTAGAATATATCTAGATGTGTATGTCTAT-TTATCTAAATTCTATATTTTATAGATGATGTAATCCTT--AAAAAAAATATCCTTA
Polypogon_fugax					TAAATAATAGAAAAAGTTAGGTTTTTTT--TATTTAATTTGAATATTGAATTTGTTAAAATAGAAAAAT-----ATATAGTC----AAG---------------------AAAAAAGATCCAGAATATATCTAGATGTGTGTGTCTAT-TTATCTAAATTCTATATTTTATGGATGATGTAATCCTT--AAAAAAAATATCCTTA
Koeleria_nitidula					TAAATAATAGAAAAAATTAGGTTTTTTT------TATATTTATTATTTAATTTGTTAAAATCTAAAAAT-----CTATAGTC----AAG---------------------AAAGAAGATCTAGAATATATCTAGATGTGTGTGTCTATATTATCTAAATTCTATATTTTATAGATGATGTAATCCTT--AAAAAAAAAATATCTT
Gastridium_ventricosum					TAAATAATAGAAAAAGTTAGG-TTTTTT--TATTTAATTTGAATATTGAATTTGTTAAAATAGAAAAAT-----ATATAGTC----AAG---------------------AAAGAAGATCTAGAATATATCTAGATGTGTATGTCTAT-TTATCTAAATTCTATATTTTATAGATGATGTAATCCTT--AAAAAAAATATCCTTA
Dichelachne_crinita		53 (Deletion)	82507	82559	TAAAT-----------------------------------------------------AATAGAAAAAT-----ATATAGTC----AAG---------------------AAAGAAGATCTAGAATATATCTAGA--TGTGTGTCTAT-TTATCTAAATTCTATATTTTATAGATGATGTAATCCTTAAAAAAAAAATATCCTTA
Arrhenatherum_elatius					TAAATAATAGAAAAAATTAGGTTTTTTT-----TTCTATTTATTATTCAATTTGTTAAAATCGAAAAAT-----CTATAGTC----AAG---------------------AAAGAAGATCTAGAATATATCTAGATGTGTGTGTCTATATTATCTAAATTCTATATTTTATAGATGATGTAATCCTT--AAAAAAAAGATCTTTA
Agrostis_gigantea					TAAATAATAGAAAAAGTTAGGTTTTTTT--TATTTAATTTGAATATTGAATTTGTTAAAATAGAAAAAT-----ATATAGTC----AAG---------------------AAAAAAGATCCAGAATATATCTAGATGTGTGTGTCTAT-TTATCTAAATTCTATATTTTATGGATGATGTAATCCTT--AAAAAAAATATCCTTA
Calamagrostis_breviligulata					TAAATAATAGAAAAAGTTAGGTTTTTTT--TATTTAATTTGAATATTGAATTTGTTAAAATAGAAAAAT-----ATATAGTC----AAG---------------------AAAGAAGATCTAGAATATATCTAGATGTGTGTGTCTAT-TTATCTAAATTCTATATTTTATAGATGATGTAATCCTT--AAAAAAAATATCCTTA
Agrostis_stolonifera					TAAATAATAG-AAAAGTTAGGTTTTTTT--TATTTAATTTGAATATTGAATTTGTTAAAATAGAAAAAT-----ATATAGTC----AAGAAAGAAGATCTAGAATATATCAAAGAAGATCTAGAATATATCTAGATGTGTGTGTCTAT-TTATCTAAATTCTATATTTTATAGATGATGTAATCCTT--AAAAAAAATATCCTTA
Hierochloe_odorata					TAAATAATAGAAAAAGTTAGGTTTTTTTTCTATTTAATTTGAATATGGAATTTGTTAAAATAGAAAAAT-----ATATAGTT----AAG---------------------AAAGAAGATCTAGAATATATCTAGATGTGTGTGTCTAT-TTATCTAAATTCTATATTTTATAGATGATGTAATCCTT-AAAAAAAAATATCCTTA
Torreyochloa_pallida					TAAATAATAAAAAAAGTTAGGTTTTTTT------TATTTTTTATATTGAATTTTTTAAAATAGAAAAAT-----ATATAGTC----AAG---------------------AAAGAAGATCTAGAATATATCTAGATGTGTGTGTCTAT-TTATCTAAATTCTATATTTTATAGATGATGTAATCCTT-AAAAAAAAATATCCTTA
Phalaris_arundinacea					TAAATAATAGAAAAAGTTAGGTTTTTTT--------TATTTAATATTGAATTTGTTAAAATAGAAAAAT-----ATATAGTC----AAG---------------------AAAGAAGATCTAGAATATATCTAGATGTGTGTGTCTAT-TTATCTAAATTCTATATTTTATAGATGATGTAATCCTT-AAAAAAAAATATCATTA
Trisetum_cernuum					TAAATAATAGAAAAAATTAGG-TTTTTT------TATATTTATTATTCAATTTGTTAAAATCTAAAAATCTATACTATAGTC----AAG---------------------AAAGAAGATCTAGAATATATCTAGATGTGTGTGTCTATATTATCTAAATTCTATATTTTATAGATGATGTAATCCTT--AAAAAAAATATCTTTA
Avena_sativa					TAAATAATAGAAAAAATTAGGTTTTTTT------TATATTTATTATTCAATTTGTTAAAATCGAAAAAT-----CTATAGTCAAAAAAA---------------------AAAGAAGATCTAGAATATATCTAGATGTGTGTGTCTATATTATCTAAATTCTATATTTTATAGATGATGTAATCCTT------AAAATATCTTTA
Anthoxanthum_odoratum					TAAATAATAGAAAAAGTTAGGTTTTTTT--TATTTAATTTGAATATTTAATTTGCTAAAATAGAAAAAT-----ATATAGTT----AAG---------------------AAAGAAGATCTAGAATATATCTAGATGTGTGTGTCTAT-TTATCTGAATTATATATTTTATAGATGATGTAATCCTT--AAAAAAAATATCCTTA
Briza_maxima		58 (Deletion)	82518	82575	TAAATAATATAAAAAT----------------------------------------------------------ATATAGTC----AAG---------------------AAAGAAGATCTAGAATATATCTAGA--TGTGTGTCTAT-TTATCTAAATTCTATATTTTATAGATGATGTAATCTGT--AAAAAAAAAATCCTTA
Amelichloa_brachychaeta		174 (Deletion)	82530	82703	TAA----TAGAAAAAGTTAGGTTTTTTT------------------------------------------------------------------------------------------------------------------------------------------------------------------------------TTA
Triplachne_nitens	31	56	82705	82760	TATTTTTACTCTTATTGAATAATGGTAAAGTATTC---------TAATTCAA----
Polypogon_fugax					TATTTTTACTCTTATTGAATAATGGTAAAGTATTC---------TAATTCAAAAAG
Koeleria_nitidula		50 (Deletion)	82708	82757	TTT--------------------------------------------------AAG
Gastridium_ventricosum					TATTTTTACTCTTATTGAATAATGGTAAAGTATTC---------TAATTCAA----
Dichelachne_crinita					TATTTTTACTCTTATTGAATAATGGTAAAGTATTC---------TAATTCAAAAAG
Arrhenatherum_elatius					TATTTTTACTCTTATTGAATAATGTTAAAGTATTC---------TAATTCAAAAAG
Agrostis_gigantea					TATTTTTACTCTTATTGAATAATGGTAAAGTATTC---------TAATTCAAAAAG
Calamagrostis_breviligulata					TATTTTTACTCTTATTGAATAATGGTAAAGTATTC---------TAATTCAAAAAG
Agrostis_stolonifera					TATTTTTACTCTT---------------------------------ATTCAAAAAG
Hierochloe_odorata					TATTTTTACTCTTATTGAATAATGGTAAAGTATTC---------TAATTCAAAAAG
Torreyochloa_pallida					TATTTTTATTCTTATTGAATAATGGTAAAGTATTC---------TAATTCAAAAAG
Phalaris_arundinacea					TATTTTGACTCTTATTGAATAATGGTAAAGTATTC---------TAATTCAAAAAG
Trisetum_cernuum					TATTTTCACTCTTATTGAATAATGGTAAAGTATTCTAATTCAAAAAATTCAAAAAG
Avena_sativa					TATTTTTACTCTTATTGAATAATGGTAATGGTAAAGTATTC---TAATTTTAAAAG
Anthoxanthum_odoratum					TATTTTTACTCTTAGTGAATAATGGTAAAGTATTC---------TAATTCAAAAAG
Briza_maxima					TATTTTTACTCTTATTGAATATTGAATAATGGTAATTC------TAATTCAAAAAG
Amelichloa_brachychaeta					TACTCTTATTCTTATTGAATAACGGTAAAGTATTC---------TAATTCAATAAG
Triplachne_nitens	32	82	84924	85005	TTTGAATCCTTTGTTTGTTTATTCTGAATCTTTCTATTCTCAATTCAGTTAACGACGAGATTTAGTATCCTTTCTTGCATTT
Polypogon_fugax					TTTGAATCCTTTGTTTATTC----AGAATCTTTCTATTCTGAATTCAGTTAACGACGAGATTTAGTATCCTTTCTTGCATTT
Koeleria_nitidula					TTTGAATCCTTTGTTTATTC----TGAATCTTTCTATTCTGAATTCAGTTAACGACGAGATTTAGTATCCTTTCTTGCATTT
Gastridium_ventricosum					TT----------------------TGAATCTTTCTATTCTCAATTCAGTTAACGACGAGATTTAGTATCCTTTCTTGCATTT
Dichelachne_crinita					TTTGAATCCTTTGTTTATTC----TGAATCTTTCTATTCTGAATTCAGTTAACGACGAGATTTAGTATCCTTTCTTGCATTT
Arrhenatherum_elatius					TTTGAATCCTTTGTTTATTC----AGAATAGAAAGATTCTGAATTCAGTTAACGACGAGATTTCGTATCCTTTCTTGCATTT
Agrostis_gigantea					TTTGAATCCTTTGTTTATTC----AGAATCTTTCTATTCTGAATTCAGTTAACGACGAGATTTAGTATCCTTTCTTGCATTT
Calamagrostis_breviligulata					TTTGAATCCTTTGTTTATTC----TGAATCTTTCTATTCTGAATTCAGTTAACGACGAGATTTAGTATCCTTTCTTGCATTT
Agrostis_stolonifera					TTTGAATCCTTTGTTTGTTTATTCAGAATCTTTCTATTCTGAATTCAGTTAACGACGAGATTTAGTATCCTTTCTTGCATTT
Hierochloe_odorata					TTTGAATCCTTTCTTTGTTTATTCTGAATCTTTCTATTCTGAATTCAGTTAACGACGAGATTTAGTATCCTTTCTTGCATTT
Torreyochloa_pallida					TTTGAATCCTTTGTTTGTTTATTCTGAATCTTTCTATTCTGAATTCAGTTAACGACGAGATTTAGTATCCTTTCTTGCATTT
Phalaris_arundinacea		64 (Deletion)	84939	85002	TTTGAATCCTTTGTT----------------------------------------------------------------TTT
Trisetum_cernuum					TTTGAATCCTTTGTTTATTC----TGAATCTTTCTATTCTGAATTCAGTTAACGACGAGATTTAGTATCCTTTCTTGCATTT
Avena_sativa					TTTGAATCCTTTGTTTATTC----AGAATGGAAAGATTCTGAATTCAGTTAACGACGAGATTTAGTATCCTTTCTTGCATTT
Anthoxanthum_odoratum					TTTGAATCCTTTGTTTATTC----TGAATCTTTCTATTCTGAATTCAGTTAACGACGAGATTTAGTATCCTTTCTTGCATTT
Briza_maxima					TTTGAATCTTT----------------------CTATTCTGAATTCAGTTAACGACGAGATTTAGTATCCTTTCTTGCATTT
Amelichloa_brachychaeta					TTTGAATCCTTTGTTTATTC----TGAATCTTTCTATTCGGAATTCAGTTAACGACGAGATTTAGTATCCTTTCTTGCATTT
Triplachne_nitens	33	81	95585	95665	CGATCCCGGCTCTGTGAGTTCTTTCTTCCGTGATGAACTGTCGGCACCAGTCCTACATTTTTGTTCTCTGTGGGCCGAGGA
Polypogon_fugax					CGATCCCGGCTCTGTGAGTTCTTTCTTCCGTGATGAACTGTCGGCACCAGTCCTGCATTTTTGTTCTCTGTGGACCGAGGA
Koeleria_nitidula					CGATCCCGGCTCTGTGAGTTCTTTCTTCCGTGATGAACTGTCGGCACCAGTCCTACATTTTTGTTCTCTGTGGACCGGGGA
Gastridium_ventricosum					CGATCCCGGCTCTGTGAGTTCTTTCTTCCGTGATGAACTGTCGGCACCAGTCCTACATTTTTGTTCTCTGTGGACCGAGGA
Dichelachne_crinita					CGATCCCGGCTCTGTGAGTTCTTTCTTCCGTGATGAACTGTCGGCACCAGTCCTACATTTTTGTTCTCTGTGGACCGAGGA
Arrhenatherum_elatius					CGATCCCGGCTCTGTGAGTTCTTTCTTCCGTGATGAACTGTCGGCACCAGTCCTACATTTTTGTTCTCTGTGGACCGAGGA
Agrostis_gigantea					CGATCCCGGCTCTGTGAGTTCTTTCTTCCGTGATGAACTGTCGGCACCAGTCCTACATTTTTGTTCTCTGTGGACCGAGGA
Calamagrostis_breviligulata					CGATCCCGGCTCTGTGAGTTCTTTCTTCCGTGATGAACTGTCGGCACCAGTCCTACATTTTTGTTCTCTGTGGACCGAGGA
Agrostis_stolonifera					CGATCCCGGCTCTGTGAGTTCTTTCTTCCGTGATGAACTGTCGGCACCAGTCCTACATTTTTGTTCTCTGTGGACCGAGGA
Hierochloe_odorata					CGATCCCGGCTCTGTGAGTTCTTTCTTCCGTGATGAACTGTCGGCACCAGTCCTACATTTTTGTTCTCTGTGGACCGAGGA
Torreyochloa_pallida					CGATCCCGGCTCTGTGAGTTCTTTCTTCCGTGATGAACTGTCGGCACCAGTCCTACATTTTTGTTCTCTGTGGACCGAGGA
Phalaris_arundinacea					CGATCCCGGCTCTGTGAGTTCTTTCTTCCGTGATGAACTGTCGGCACCAGTCCTACATTTTTGTTCTCTGTGGACCGAGGA
Trisetum_cernuum					CGATCCCGGCTCTGTGAGTTCTTTCTTCCGTGATGAACTGTCGGCACCAGTCCTACATTTTTGTTCTCTGTGGACCGAGGA
Avena_sativa					CGATCCCGGCTCTGTGAGTTCTTTCTTCCGTGATGAACTGTCGGCACCAGTCCTACATTTTTGTTCTCTGTGGACCGAGGA
Anthoxanthum_odoratum					CGATCCCGGCTCTGTGAGTTCTTTCTTCCGTGATGAACTGTCGGCACCAGTCCTACATTTTTGTTCTCTGTGGACCGAGGA
Briza_maxima					CGATCCCGGCTCTGTGAGTTCTTTCTTCCGTGATGAACTGTCGGCACCAGTCCTACATTTTTGTTCTCTGTGGACCGAGGA
Amelichloa_brachychaeta		75 (Deletion)	95588	95662	CGA---------------------------------------------------------------------------GGA
Triplachne_nitens	34	71	106743	106813	TTGTGAACCCATATTAGGCTATTTACACAGAGGAATGGAAAAAATCGCGGAAAACCGA----------TAG
Polypogon_fugax					TTGTGAACCCATATTAGGCTATTTACACAGAGGAATGGAAAAAATCGCGGAAAACCGA----------TAG
Koeleria_nitidula					TTGTGAACCCATATTAGGCTATTTACACAGAGGAATGGAAAAAATCGCGGAAAACCGAAC-----TATTAA
Gastridium_ventricosum					TTGTGAACCCATATTAGGCTATTTACACAGAGGAATGGAAAAAATCGCGGAAAACCGA----------TAG
Dichelachne_crinita					TTGTGAACCCATATTAGGCTATTTACACAGAGGAATGGAAAAAATCGCGGAAAACCGAAC-----TATTAG
Arrhenatherum_elatius					TTGTGAACCCATATTAGGCTATTTACACAGAGGAATGGAAAAAATCGCGGAAAACCGAAC-----TATTAT
Agrostis_gigantea					TTGTGAACCCATATTAGGCTATTTACACAGAGGAATGGAAAAAATCGCGGAAAACCGA----------TAG
Calamagrostis_breviligulata					TTGTGAACCCATATTAGGCTATTTACACAGAGGAATGGAAAAAATCGCGGAAAACCGAAC-----TATTAG
Agrostis_stolonifera					TTGTGAACCCATATTAGGCTATTTACACAGAGGAATGGAAAAAATCGCGGAAAACCGA----------TAG
Hierochloe_odorata					TTGTGAACCCATATTAGGCTATTTACACAGAGGAATGGAAAAAATCGCGGAAAACCGAAC-----TATTAG
Torreyochloa_pallida					TTGTGAACCCATATTAGGCTATTTACACAGAGGAATGGAAAAAATCGCGGAAAACCGAAC-----TATTAG
Phalaris_arundinacea		65 (Deletion)	106746	106810	TTG-----------------------------------------------------------------TAG
Trisetum_cernuum					TTGTGAACCCATATTAGGCTATTTACACAGAGGAATGGAAAAAATCGCGGAAAACCGAAC-----TATTAA
Avena_sativa					TTGTGAACCCATATTAGGCTATTTACACAGAGGAATGGAAAAAATCGCGGAAAACCGAAC-----TATTAA
Anthoxanthum_odoratum					TTGTGAACCCATATTAGGCTATTTACACAGAGGAATGGAAAAAATAGCGGAAAACCGAAC-----TATTAT
Briza_maxima					TTGTGAACCCATATTGGGCTATTTACACAGAGGAATGGAGAAAATCGCGGAAAACCGAACTATTATATTAG
Amelichloa_brachychaeta					TTGTGAACCCATATTAGGCTATTTACACAGAGGAATGGAAAAAATCGCGGAAAACCAAAAAAAAAGAATAT
Triplachne_nitens	35	178 (Deletion)	109314	109491	AAG-AAAA----------------------------------------------------------------------------------------------------------------------------------------------------------------------------------AAAAGTGGAATCTTTTTACTTT-CTAT---TCAT
Polypogon_fugax		220	109306	109525	AAGAAAAAAAAACTGGAATTCTTAATTTTT----CCAAAATTTATTTCATTGAGATAATCAAAAATTAAGAATAGGTTGA------ATTGGTTAAATTCAAAAAGTTAATAAAATAA------GTTCGTTACCTAGTTATTACCTAAA-TAAGG-------ATATTTATTAAAA------T--AACAAAAGTGTAATCTTTTTACTTT-CTAT---TCAT
Koeleria_nitidula					AAG-AAAAAATACTGGAATTCTTAATTTTTGAAAAAAAAATTTATTTCATTGAGATAATCAAAAATTTAAAATGGGTTTA------ATTGGTTAAATTCAAAAAGTTAATCAAAGAA------CTTCGTTACCTAATTATTACCTAAA-AAAGG-------ATATTTAGT------------AAAAAAAAGTGGAATCTTTTTCCTTT-CTAT---TCAT
Gastridium_ventricosum					AAG-AAAAAAAACTGGAATTCTTAATTTTT----CCAAAATTTATTTCATTGAGATAATAAAAAATTAAGAATGGGTTGA------ATTGGTTAAATTCAAAAAGTTAATCAAAAAA------GTTCGTTACCTACTTATTACCTAAA-TAAAG-------ATATTTAAAAA--------TAAAAAAAAAGTGGAATCTTTTTACTTT-CTAT---TCAT
Dichelachne_crinita					AAG-AAAAAATACTGGAATTCTTAATTTTT----CCAAAATTTATTTCATTGAGATAATAAAAAATTAAGAATGGGTTGA------ATTGGTTAAATTCAAAAAGTTAATCAAATAA------CTTCGTTACCTAGTTATTACCTAAA-TAAGG-------ATATTTATTAAAAT-----ACAAAAAAAAGTGGAATCTTTTTACTTT-CTAT---TCAT
Arrhenatherum_elatius		62 (Deletion)	109454	109515	AAG-AAAAAATACTGGAATTCTTAATTTTT---TCAAAAATTTATTTCATTGAGATAATCAAAAATTCAAAATGGGTTTA------ATTGGTTAAATTCAAAAAGTTAATCNNNNNN------NNNNNNNNNNNNNNNNNNNNNNNNN--------------------------------------------------------------NNN---NNAT
Agrostis_gigantea					AAG-AAAAAAAACTGGAATTCTTAATTTTT----CCAAAATTTATTTCATTGAGATAATCAAAAATTAAGAATGGGTTGA------ATTGGTTAAATTCAAAAAGTTAATAAAATAA------GTTCGTTACCTAGTTATTACCTAAATTAAGG-------ATATTTATTAAAA------TAAAAAAAAAGTGGAATCTTTTTACTTT-CTAT---TCAT
Calamagrostis_breviligulata					AAG-AAAAAAAACTGGAATTCTTAATTTTT----CCAAAATTTATTTCATTGAGATAATCAAAAATTAAGAATGGGTTGA------ATTGGTTAAATTCAAAAAGTTAATCAAATAA------GTTCGTTACCTAGTTATTACCTAAA-TAAGG-------ATATTTATTAAAATTAAAATAAAAAAAAAGTGGAATCTTTTTACTTT-CTAT---TCAT
Agrostis_stolonifera					AAG--AAAAAAACTGGAATTCTTAATTTTT----CCAAAATTTATTTCATTGAGATAATCAAAAATTAAAGATGGGTTGA------ATTGGTTAAATTCAAAAAGTTAATAAAATAA------GTTCGTTACCCAGTTATTACCTAAA-TAAGG-------ATATTTATTAAAAT-----AAAAAAAAAAGTGGAATCTTTTTACTTT-CTAT---TCAT
Hierochloe_odorata					AAG-AAAAAATACTAGAATTCTTAATTTTT----CCAAAATTTATTTCATTGAGATAATCAAAAATTAAGAATGGATTTA------ATTGGTTAAATTAAAAAAGTTAATCAAATAA------CTTCGTTACCTAGTTATTACCTAAA-TAAGG-------ATATTTATGAAAAT-----ACAAAAAAAGGTTGAATCTTTTTACTTTACTAT---TCAT
Torreyochloa_pallida					TAAGAAAAAATACTGGAATTCTTAATTT-T----CCAAAATTTATTTAATTGAGATAATCAAAAATTAAG---------A------ATTGGTTTAATTCAAAAAGTTAATCAAATAA------CTTCGTTACCTAGTTATTACCTAAA-TAAGG-------ATATTTATTAAAATAC---AAAAAAAAAGGTTGAATCTTTTTACTTT-CTAT---TCAT
Phalaris_arundinacea					AAG-AAAAAATACTGGAATTCTTAATTTTT----CCAAAATTTATTTCATTGAGATAATCAAAAATTAAGAATGGGTTTAATTGATATTGATTAAATTCAAAAAGTTAATCAAATAA------CTTCGTTACCTAGTTATTACCTAAA-TAAGG-------ATATTTATTAAAA------TACAAAAAAGGTTGAATCTTTTTACTTT-CTAT---TCAT
Trisetum_cernuum					AAG-AAAAAATACTGGAATTCTTAATTTTT---TCAAAAATTTATTTCATTGAGATAATCAAAAATTAAAAATGGGTTTA------ATTGGTTAAATTCAAAAAGGTAATCAAATAA------CTTCGTTACCTAATTATTACCTAAA-TAAGG-------ATATTTAGTAAAAT-----AAAAAAAAAGGTTGAATCTTTTTACTT-----T---TCAT
Avena_sativa		57 (Deletion)	109470	109526	AAG-AAAAAATACTGGAATTCTTAATTTTT---TCAAAAATTTATTTCATTGAGATAATCTAAAATTCAAAATGGGTTTA------ATTGGTTAAATTCAAAAAGTTAATCAAAAAA------CTTCGTTACCTAATTATTACCTAAA-TAAGG-------ATA--------------------------------------------------------
Anthoxanthum_odoratum					AAG-AAAAAATACTGGAATTCTTCATTTTT----CCAAAATTTATTTCATTGATATAATCAAAAATTAAGAATGAGTTTA------ATTGGTTAAATTCAAAAAGTTAATCAAATAA------CTTCGTTACCTAGTTATTACCTAAA-TAAAGATATTTAATATTTATTAAAATA----CAAAAAAAAGGTTGAATCTTTTTACTTTACTAT---TCAT
Briza_maxima					AAG-AAAAAATACTGGAATTCTTAATTTTT----CTGAAATTTATTTCATTGAGATAATCAAAAATTAAGAATGGGTTTC------ATTGGTTAAATTCAAAAAGTTAATCAAATAACTTCGTCTTCGTTACCTAGTTATTACCTAAATTAAGG-------ATATTTATTAAAAT---------AAAAAAGTGGAATCTTTTTACTTT-CTATTCATCAT
Amelichloa_brachychaeta		56 (Deletion)	109309	109364	AAG--------------------------------------------------------CAAAAATGAAGAATGGTTTA-------ATTGGTTAAATTAAAAAAGTTAATCAAATAA------CTTTGTTACCTAGTTATTACCTAAA-TAAGG-------ATATTTATTAAAAT-----ACAAAAAAAGGTTGCATTTTTTTACTTT------------
Triplachne_nitens	36	215	109566	109780	GTCTTGTTTCGTAACTGATTGATTGAATTCCA-----ATGAAAAGAAAACCCATGTTTATAAAAAATTCTCAAATAGTTCTTACTTAA---ATATAGAACTCAAATCCTGATGACTATAATTACCTAAGTTTTAGAATGTCTTGTTTAAGAGACTCAGTA----TTTTTTGTTTTGATGGGTATTCCATTATGGAATACCAT-TCTGAACTTAAT
Polypogon_fugax					GTCTTGTTTCGTAACTGATTGATTGAATTCCA-----ATGAAAAGAAAACCCATGTTTATAAAAAATTCTCAAATAGTTCTTACTGAA---ATATAGAACTCAAATCCTAATGACTATAATTACCTAAGTTTTATAATGTCTTGTTTAAGAGACTCAGTA----TTTTTTGTTTTGATGGGTATTCCATTATGGAATACCATATCTGAACTTAAT
Koeleria_nitidula					CTCTTGTTTCGTAACTGATTGATTGAATTCCAATGAAATGAAAAGAAAAACCATGTTTCTCAAAAATTATAAAATAGTTCTTACTT-C---ATATAGAACTCAAATCCTAATGACTATAATTACCTAAGTTTAAGAATGTCTTGTTTAAGAGACTCCGTA----TTTTTTGTTTTGATGGGTATTCCATTATGGAATACCAT-TCTGAACTTAAT
Gastridium_ventricosum					GTCTTGTTTCGTAACTGATTGATTGAATTCCA-----ATGAAAAGAAAACCCATGTTTATAAAAAATTCTCAAATAGTTCTTACTTAA---ATATAGAACTCAAATCCTGATGACTATAATTACCTAAGTTTTAGAATGTCTTGTTTAAGAGACTCAGTA----TTTTTTGTTTTGATGGGTATTCCATTATGGAATACCAT-TCTGAACTTAAT
Dichelachne_crinita					CTCTTGTTTCGTAACTGATTGATTGAATTCCA-----ATGAAAAGAAAACCCATGTTTATAAAAAATTATCAAATAGTTCTTACTT-C---ATATAGAACTCAAATCCTAATGACTATAATTACCTAAGTTTTAGAATGTCTTGTTTAAGAGACTCAGTA----TTTTTTGTTTTGATGGGTATTCCATTATGGAATACCAT-TCTGAACTTAAT
Arrhenatherum_elatius					CTCTTGTTTCGTAACTAATTGATGGAATTCCA-----ATGAAAAGAAAACCCATGTTTATAAAAAATTATAAAATAGTCCTTACTTCATATAGAAAGAATTCAAATCCTAATGACTATAATTACCTAAGTTTAAGAATGTCTTGTTTAAGAGACTCCGTATTT-TTTTTTGTTTTGATGGGTATTCCATTATGGAATACCAT-TCTGAACTTAAT
Agrostis_gigantea					GTCTTGTTTCGTAACTGATTGATTGAATTCCA-----ATGAAAAGAAAACCCATGTTTATAAAAAATTCTCAAATAGTTCTTACTGAA---ATATAGAACTCAAATCCTAATGACTATAATTACCTAAGTTTTATAATGTCTTGTTTAAGAGACTCAGTA----TTTTTTGTTTTGATGGGTATTCCATTATGGAATACCATATCTGAACTTAAT
Calamagrostis_breviligulata					GTCTTGTTTCGTAACTGATTGATTGAATTCCA-----ATGAAAAGAAAACCCATGTTTATAAAAAATTCTCAAATAGTTCTTACTTAA---ATATAGAACTCAAATCCTAATGACTAGAATTACCTAAGTTTTAGAATGTCTTGTTTAAGAGACTCAGTAT---TTTTTTGTTTTGATGGGTATTCCATTATGGAATACCAT-TCTGAACTTAAT
Agrostis_stolonifera					GTCTTGTTTCGTAACTGATTGATTGAATTCCA-----ATGAAAAGAAAACCCATGTTTATAAAAAATTCTCAAATAGTTCTTACTGAA---ATATAGAACTCAAATCCTAATGACTATAATTACCTAAGTTTTATAATATCTTGTTTAAGAGACTCAGGA----TTTTTTGTTTTGATGGGTATTCCATTATGGAATACCATATCTGAACTTAAT
Hierochloe_odorata		181 (Deletion)	109569	109749	CTC-------------------------------------------------------------------------------------------------------------------------------------------------------------------------------------TCCATTATGGAATACCAT-TCTGAACTTAAT
Torreyochloa_pallida					CTCTTGTTTCGTAACTGATTGATTGCATTCCA-----ATGAAAAGAAAACCCATGTTTATACAAAATTATCAAATAGTTCTTACTT-C---ATATAGAACTCAAATCCTACTGACTATAATTACCTAAGTTTTAGAATGTCTTGTTTAAGAGACTCAGTA----TTTTTTGTTTTAATGGGTATTCCATAATGGAATACCAT-TCTGAACTTAAT
Phalaris_arundinacea					CTCTTATTTCGTAACTGATTGATTGAATTCCA-----ATGAAAAGAAAACCCATGTTTATACAAAATAATCAAATAGTTCTTACTTCA---ATATAGAACTCAAATCCTAATGACTATAATTGCCTAAGTTTTAGAATGTCTTGTTTAAGAGACTCAGTATTTATTTTTTGTTTTGATGGGTATTCCATTATGGAATACCAT-TCTGAACTTAAT
Trisetum_cernuum		180 (Deletion)			CTCTTGTTTCGTAACTGATTGATTGAATTCCA------------------------------------------------------------------------------------------------------------------------------------------------------------------------------------AAT
Avena_sativa					CTCTTGTTTCGTAACTGATTGATTGAATTCCA-----ATGAAAAGAAAACCCATGTTTATAAAAAATTATAAAAGAGTTCTTACTT-C---ATATAGAACTCAAATCCTAATGACTATAATTACCTAAGTTTAAGAATGTCTTGTTTAAGAGACTCCGTA----TTTTTTGTTTTGATGGGTATTCCATAATGGAATACCAT-TCTGAACTTAAT
Anthoxanthum_odoratum					CTCTTGTTTCGTAACTGATTGATTGAATTCCA-----ATGAAAAAAAAA-CCACATTTATAAAAAATTATCAAATAGTTCTTACTTC----ATATAGAACTCAAATCTTAATGACTATAATTACTTAAGTTTCAGTA---------------------------TTTTTTGTTTTGATGGGTATTCCATTATGGAATACCAT-TCTGAACTTAAT
Briza_maxima					CTCTTGTTTCGTAACTGATTGATTGAATTCCA-----ATGAAAATAAAACCTATGTTTATAAACAATTAACAAATAGTTCTTACTTC----ATATAGAACTAAAATCCTAATGACTCTATTTCCCTAAGTTTTAGAATGTCTTGTTTAAGAGACTCAGTA----TTTTTTGTTTTGATGGGTATTCTATTATGGAATACCAT-TCTGAACTTAAT
Amelichloa_brachychaeta					CTCTTGTTTCGTAACTGATTAATCGAATTCCA----------ATAAAAAACCGTGTTTATAAGAAATTATCAAATAGTCGTTACTTC----ATATAGAACTGAAATCCTAATGACTATAATTACCTAAGTTTTAGAATACCTTGTTTAAGAGACTCACTA----TTTTTAGTTTTGATTGGAATTCCATTATGGAATACCAT-TCTGAACTTAAT
Amelichloa_brachychaeta
Triplachne_nitens	37	67	109965	110031	TACGGAA----AAATATTTAAAAAATTCTTGTCTTATCCGCATTAAACAAAATTAAGTAAAAAATAA
Polypogon_fugax					TACGG-A----AAAAATTTTAAAAATTCTTGTCTTATCCGCATTAGACAAAATTAAGTAAAAAATAA
Koeleria_nitidula		55 (Deletion)	109972	110026	TACGGAA-------------------------------------------------------AAAAA
Gastridium_ventricosum					TACGGAA----AAAAAATTTAAAAATTCTTGTCTTATCCGCATTAGACAAAATTAAGTAAAAAATAA
Dichelachne_crinita					TACGGAA----AAAAAATTTTAAAATTCTTGTCTTATCCGCATTAGACAAAATTAAGTAAAAAATAA
Arrhenatherum_elatius					TATATAT-----------------------------------------------ATACGGAAAAAAA
Agrostis_gigantea					TACGGAA----AAAAATTTAAAAAATTCTTGTCTTATCCGCATTAGACAAAATTAAGTAAAAAATAA
Calamagrostis_breviligulata					TACGGAA----AAAAATTTAAAAAATTCTTGTCTTATCCGCATTAGACAAAATTAAGTAAAAAATAA
Agrostis_stolonifera					TACGGAA----AAAAATTTTTAAAATTCTTGTCTTATCCGCATTAGACAAAATTAAGTAAAAAATAA
Hierochloe_odorata		51 (Deletion)	109979	110029	TATGGAA----AAA---------------------------------------------------AA
Torreyochloa_pallida					TATGGAA----AAAAATTTAAAAAATTCTTGTCTTATCCACATTAGACAAAATTAAGTCAAAAATAA
Phalaris_arundinacea					TACGGAAGGAAAAAAATTTTTAAAATTCTTGTCTTATCCGCATTAGACAAAATTAAGTAAAAAATAA
Trisetum_cernuum		55 (Deletion)	109972	110026	TACGGAA-------------------------------------------------------AAAAA
Avena_sativa		55 (Deletion)	109972	110026	TACGGAA-------------------------------------------------------AAAAA
Anthoxanthum_odoratum					TATGGAA----AAAATTTTAAAAAATTATTATCTTATCCACATTGGACAAAATAAAGTAAAAAATAA
Briza_maxima					TACGGAA------AAAATTTTAAAATTCTTGTCTTATCCGCATTAGACAAAATTAAGTAAAAAATAA
Amelichloa_brachychaeta					T---------------------------------TATATACGGGAAAAAAAATGAAGTAAAAAATAC
Triplachne_nitens	38				ATAAATTTTT------------------------------------------------------------------------------CCTTTTAT----TGAAAGAATTTT
Polypogon_fugax					ATAAATTTTT------------------------------------------------------------------------------CCTTTTAT----TGAAAGAATTTT
Koeleria_nitidula					ATCAATTTTT------------------------------------------------------------------------------CCTTTTAT----TGAAAGAATTTT
Gastridium_ventricosum					ATAAATTTTT------------------------------------------------------------------------------CCTTTTAT----TGAAAGAATTTT
Dichelachne_crinita					ATA----------------------------------------------------------------------------------------------------------TTG
Arrhenatherum_elatius					ATAAATTTTT------------------------------------------------------------------------------CCTTTTAT----TGAAAGAATTCT
Agrostis_gigantea					ATAAATTTTT------------------------------------------------------------------------------CCTTTTAT----TGAAAGAATTTT
Calamagrostis_breviligulata					ATAAATTTTT------------------------------------------------------------------------------CCTTTTAT----TGAAAGAATTTT
Agrostis_stolonifera					CTAAATTTTT------------------------------------------------------------------------------CCTTTTAT----TGAAAGAATTTT
Hierochloe_odorata					ATAAATTTTG------------------------------------------------------------------------------CCTTTTAT----TGAAAGAATTTT
Torreyochloa_pallida					ATAAATTTTT------------------------------------------------------------------------------CCTTTTATAGAATGAAAGAGTTTT
Phalaris_arundinacea					ATAAATTTTG------------------------------------------------------------------------------CCTTTTATAGAATGAAAGAATTTT
Trisetum_cernuum					ATAATTTTTT------------------------------------------------------------------------------CCTTTTAT----TGAAAGAATTTT
Avena_sativa					ATAAATTTTT------------------------------------------------------------------------------CCTTTTAT----TGAAAGAATTCT
Anthoxanthum_odoratum					ATAAATTTTT------------------------------------------------------------------------------CCTTTTAT----TGAAAAAATTTT
Briza_maxima					ATAA----TT------------------------------------------------------------------------------CCTTTTAT----TGAAAGAATTTT
Amelichloa_brachychaeta		78 (Insert)	110803	110880	CTAAATTTTTCAAAAATTACAAAAGCCTTTTCTATTTATCCATTTTAATTTAATCATTAAATAGAAACAAATCTTTTTGAATTTTGTCCATTTTAT----TGAAAGAATTTC
Triplachne_nitens	39	66	110911	110976	TTAAGGGAGAAACTAAT-T-AGAAAAAAAAATTTGTTCTATATTGATATTGCACAACTTAG---AA
Polypogon_fugax					TTAAGGGAGAAACTCAT-TCTAAAAAAATTAGTTCT---------ATATTGCACAACTTAG--AAA
Koeleria_nitidula					TTAAGGGAGAAACTAAT-TATA-----------------------------------------AAA
Gastridium_ventricosum					TTAAGGGAGAAACTAAT-TCGAAAAAAAAAATTTGTTCT------ATATTGCACAACTTAG--AAA
Dichelachne_crinita		59 (Deletion)	110914	110969	TTA--------------------------------------------------------GA--AAA
Arrhenatherum_elatius					TTAAGGGAGAAACTAAT-TAG------------------------------------------AAA
Agrostis_gigantea					TTAAGGGAGAAACTAAT-TCTAAAAAAATTAGTTCT---------ATATTGCACAACTTAG--AAA
Calamagrostis_breviligulata					TTAAGGGAGAAACTAAT-T----------------------------------------AG--AAA
Agrostis_stolonifera					TTAAGGGAGA-----AT-TTTAAAAAAATTAGTTCT---------ATATTGCACAACTTAT--AAA
Hierochloe_odorata					TTAAGGGAGAAACTAAT-TAGAAAAAAATTAGTTCT---------ATATTGCGCAACTTAGAAAAA
Torreyochloa_pallida					TTAAGGGAAAAACTAAT-TAGAAAAAAATTAGTTCT---------ATATTGCACAACTTAT---AA
Phalaris_arundinacea					TTAAGGGAGAAACTAATATAGAAAAAAATTAGTTCTA--------TAATTGCACAACTTAG---AA
Trisetum_cernuum					TTAAGGGAGAAACTAAT-TA-G-----------------------------------------AAA
Avena_sativa					TTAAGGGAGAAACTAAT-TA-G-----------------------------------------AAA
Anthoxanthum_odoratum					TTAAGGGAACAACTAAT-TAGAAAA--------------------------------------AAA
Briza_maxima					TTAAGGGAGAAACTAAT-TAGAAA---------------------------------------AAA
Amelichloa_brachychaeta					TTAAAGGAGAAACTAATTAGAAAAAAAATTAGTTCTATATTGCAATTGCAACTAAAA------AAA
Triplachne_nitens	40	149	116094	116242	ATATTTTTTTTTGTATATAAGCTGTATAGTTATAAATTATATCACGAAAATCTAGTCTGATT--TAAAATACTAAAAAATTTCCAATAAGCA-GTAGTTATTGGTTTTTCTTTATAGTTTAGTAAAGGATTCTTCTTTTTTTATAATAT
Polypogon_fugax					ATA-CTTTTTTTGTGTATAAGCTGTATAGTTAGAAATTATATCACAAAAATCTAGTCTGATT--TAAAATATTAAAAAATTTCCAATAAGCA-GTAGTTATTCGTTTTTCTTTATAG-TTAGTAAAGGAGTATTCTTTTTT-----TAT
Koeleria_nitidula					ATA-TTTTTT-TTTGTATAAGCTGTATAGTTAGAAATTATATCACGAAAATCTAGTCTGATT--TAAAATAATCAAAAATTTCCAATAAGCATGTAGTTATTCTTTTTTCTTTATAG-TTAGTAAAGGATTATTCTTTTTT-----TAT
Gastridium_ventricosum					ATA-TTTTTTTTGTATATAAGCTGTATAGTTAGAAATTATATCACGAAAATCTAGTCTGATT--TAAAATACTAAAAAATTTCCAATAAGCA-GTAGTTATTGGTTTTTATTTATAG-TTAGTAAAGGATTCTTCTTTTTTTATAATAT
Dichelachne_crinita					ATA-TTTTTTTTGTGTATAAGCTGTATAGTTAGAAATTATATCACGAAAATCTAGTCTGATT--TAAAATAATAAAAAATTTCCAATAAGCA-GTAGTTATTCGTTTTTCTTTATAG-TTAGTAAAGGATTATTCTTTTTT-----TAT
Arrhenatherum_elatius					ATA-TTTTTTTTGTGTATAAGCTGTATAGTTAGAAATTATATCACGAAAATCTAGTCTGATT--TAAAATAATCCAAAATTTCCAATAAGCATGTAGTTATTCGTTTTTCTTTATAG-TTAGTAAAGGATTATTCTTTTTT-----TAT
Agrostis_gigantea					ATA-CTTTTTTTGTGTATAAGCTGTATAGTTAGAAATTATATCACGAAAATCTAGTCTGATT--TAAAATACTAAAAAATTTCCAATAAGCA-GTAGTTATTCGTTTTTCTTTATAG-TTAGTAAAGGAGTATTCTTTTTT-----TAT
Calamagrostis_breviligulata					ATA-TTTTTTTTGTGTATAAGCTGTATAGTTATAAATTATATCACGAAAATCTAGTCTGATT--TAAAATACTAAAAAATTTCCAATAAGCA-GTAGTTATTCGTTTTTCTTTATAG-TTAGTAAAGGATTATTCTTTTTT-----TAT
Agrostis_stolonifera					ATATTTTTTTTTGTGTATAAGCTGTATAGTTAGAAATTATATCACGAAAATCTAGTCTGATT--TAAAATACTAAAAAATTTCCAATAAGCA-GTAGTTATTCGTTTTTCTTTATAG-TTAGTAAAGGATTATTCTTTTTT-----TAT
Hierochloe_odorata					ATA-TTTTTTTTGTGTATAAGCAGTATAGTTAGAAATTATATCATGAAAATCTAGTCTGATT--TAAAATAATAAAAAATTTCCAATAAGCA-GTAGTTATTCGTTTTTATTTATAG-TTAGTAAAGGATTATTCTTTTTT-----TAT
Torreyochloa_pallida					ATATTTTTTTTTGTGTATAAGCTGTATAGTTAGAAATTATATCACGAAAATCTAGTCTGATTTATAAAATAATAAAAAATTTCCAATAAGCA-TTAGTTATTAGTTTTTATTTATAG-TTAGTAAAGGATTATTCTTTTTT-----TAT
Phalaris_arundinacea					ATA-TTTTTTTTGTGTATAAGCTGTATAGTTAGAAATTATATCACGAAAATCTAGTCTGATT--TAAAATAATAAAAAATTTCCAATAAGCA-GTAGTTATTAGTTTTTCTTTATAG-TTAGTAAAGGATTATTCTTTTTT-----TAT
Trisetum_cernuum					ATA-TTTTTT-TTTGTATAAGTTGTATAGTTAGAAATTCTATCACGAAAATCTAGTCTGATT--TAAAAAAATCAAAAATTTCCAATAAGCATGTAGTTATTCGTTTTTCTTTATAG-TTAGTAAAGGATTATTCTTTTTT-----TAT
Avena_sativa					ATA-TTTTTTGGGGGTATAAGCTGTATAGTTAGAAATTATATCACGAAAATCTAGTCTGATT--TAAAATAATCAAAAATTCCGAATAAGCATGTAGTTATTCGTTTTTCTTTATAG-TTAGTAAAGGATTATTCTTTTTT-----TAT
Anthoxanthum_odoratum					ATA-TTTTTTTTGTGTATAAGCTGTATAGTTAGAAATTATATCATGAAAATAGAGTCTGATT--TAAAATAATAAAAAATTCCCAATAAGCA-GTAGTTATTCATTTTTCTTTATAA-TTAGTAAAATATTATTCTTTTTG-----TTA
Briza_maxima					ATA-TTTTTTTTGTGTATAAGCTGTATAGTTAGAAATTATATCACGAAAATCTAGTCTGATT--TAAAATAATCAAAAATTTCCAATAAGTA-GTAGTTATTTGTTTTTCTTTATAGTTTAGTAAAGGATTATTCTTTTTT-----TAT
Amelichloa_brachychaeta		164 (Deletion)	116230	116097	AGA--------------------------------------------------------------------------------------------------------------------------------------TTTT-----TAT
	8 total

## Sheet: G1 BINARY
Name	A1	B1	C1	D1	E1	F1	G1
Amelichloa_brachychaeta	0	0	0	0	0	0	0
Triplachne_nitens	0	0	0	0	0	0	0
Polypogon _fugax	0	0	0	0	0	0	0
Koeleria_nitidula	0	0	0	1	0	0	0
Dichelachne_crinita	0	0	1	0	0	0	1
Gastridium_ventricosum	0	0	0	0	0	0	0
Agrostis_gigantea	0	0	0	0	0	0	0
Agrostis_stolonifera	0	0	0	1	0	0	0
Arrhenatherum_elatius	0	0	0	1	0	0	0
Avena_sativa	0	0	1	0	0	0	1
Calamagrostis_breviligulata	1	0	1	0	0	1	1
Hierochloe_odorata	0	0	0	0	0	0	0
Trisetum_cernuum	0	1	0	0	0	0	0
Anthoxanthum_odoratum	1	0	1	0	0	0	1
Torreyochloa_pallida	0	1	0	0	0	0	0
Phalaris_arundinacea	0	0	0	0	1	0	0
Briza_maxima	0	0	0	0	1	1	0

## Sheet: G2
Alignment	Number	Length	Nuc. Beg.	Nuc. End.	Sequence
Lamarckia_aurea	1				C-AA---------------TCAACCTTCAAAAAAGTTTAATTAATTTAATTACTAT------A-TTAGAATTAGATTAGCAATATA------TTTTTTTTCGTAAC--------------------------------AAAAAAAATGAACTAT-GTAACTAA-ATAAACTACTCC
Ventenata_macra					CAAT-----AAATAAACTATCAACCTTCAAAAAAGTTTAATTAATGTAATTACTAT------A-TTAGAATAAGATTAGCAATATA------TTTTTTTTCATAACA-------------------------------AAAAAAA-------------------------------
Scolochloa_festuaceae					CAAT-----AAATAAACTATCAACCTTCAAAAAAGTTTAATTAATTTAATTACTAT------ATTTAGAATTAGATTAGCAATATA------TTTTTTTCCGTAACA-------------------------------AAAAAAAATGAACTAT-GTAACTAA-ATAAACTACTCC
Nephelochloa_orientalis					CAAT-----AAATAAACTATCAACCTTCAAAAAAGTTTAATTAATGTAATTACTAT------A-TTAGAATAAGATTAGCAATATATATATTTTTTTTTCCATAACA-------------------------------AAAAAAA--GAACTAT-GTAACTAA-CGAAACTATTCC
Holcus_lanatus					CAAT-----AAATAAACTATCAACCTTCAAAAAAGTTTAATTAATTTAATTACTAT------A-TTAGAATTAGATTAGCAATATA------CTTTTTTCCGTAACA-------------------------------AAAAAAAATGAACTAT-GTAAGTAA-ATAAACTATTCC
Poa_subgen_Stenopoa		153 (Deletion)	8487	8639	CAAT-----AAATAAACTAT---------------------------------------------------------------------------------------------------------------------------------------------------------TCC
Festuca_ovina					CAAT-----AAATAAACTAGCAACCTTAAAAAAAGTTTAATTAATTTAATTACTATATTAGAAATTAGAATTAGATTAGCAATATA-----TTTTTTTTCCGTAAC--------------------------------AAAAAAAATGAACTAT-GTAACTAA-ATAAACTATTCC
Desmazeria_sicula		134 (Deletion)	8471	8604	CAAT--------------------------------------------------------------------------------------------------------------------------------------AA------------------------ATAAACTACTCC
Catapodium_rigidum		134 (Deletion)	8471	8604	CAAT--------------------------------------------------------------------------------------------------------------------------------------AA------------------------ATAAACTACTCC
Catapodium_marinum		134 (Deletion)	8471	8604	CAAT--------------------------------------------------------------------------------------------------------------------------------------AA------------------------ATAAACTACTCC
Castellia_tuberculosa					CAAT-----AAATAAACTAGTAACCTTAAAAAAAGTTTAATTAATTTAATTACTAT------ATTTAGAATTAGATTAGCAATATA---TTTTTTTTTTCCGTAACA-------------------------------AAAAAAAATGAACTAT-GTAACTAA-ATCAACTACTCC
Ammochloa_palestina					TAAA---------------TCAACCTTCAAAAAAGTTTAATTAATTTAATTACTCT------A-TTAGAATTAGATTAGCAATATA------TTTTTTTCCGTAACAA------------------------------AAAAAAAATGAACTAT-GTAACTAA-ATAAACTACTCC
Alopecurus_arundinaceus					CAAT-----AAATAAACTATCAACCTTCAAAAAAGTTTAATTAATGTAATTACTAT------A-TTAGAATTAGATTAGCAATATA-----TTTTTTTTCCATAACA-------------------------------AAAAAAAAGGAACTAT-GTAACTAA-ATAAACTATTCC
Poa_palustris		153 (Deletion)	8487	8639	CAAT-----AAATAAACTAT---------------------------------------------------------------------------------------------------------------------------------------------------------TCC
Festuca_ovina_NC_019649					CAAT-----AAATAAACTAGCAACCTTAAAAAAAGTTTAATTAATTTAATTACTAT-------ATTAGAATTAGATTAGCAATATA-----TTTTTTTTCCGTAAC--------------------------------AAAAAAAATGAACTAT-GTAACTAA-ATAAACTATTCC
Festuca_altissima					CAAT-----AAATAAACTATCAACCTTCAAAAAAGTTTAATTAATTTAATTACTAT------A-TTAGAATTAGATTAGCAATATA------TTTTTTTCCTTAAC--------------------------------AAAAAAAAAGAACTAT-GTAACTAA-ATAAACTACTCC
Festuca_arundinacea					CAAT-----AAATAAACTATCAACCTTCGAAAAAGTTTAATTAATTTAATTACTAT------A-TTAGAATTAGATTAGCAATATA------TTTCTTTCCTTAAGA-------------------------------AAAAAAAAAGAACTATAGTAACTAACATAAACTACTCC
Festuca_pratensis					CAAT-----AAATAAACTATCAACCTTCAAAAAAGTTTAATTAATTTAATTACTAT------A-TTAGAATTAGATTAGCAATATA------TTTCTTTCCTTAAG--------------------------------AAAAAAAAAGAACTATAGTAACTAACATAAAATACTCC
Lolium_multiflorum					CAAT-----AAATAAACTATCAACCTTCAAAAAAGTTTAATTAATTTAATTACTAT------A-TTAGAATTAGATTAGCAATATA------TTTCTTTCCTTAAGA-------------------------------AAAAAAAAAGAACTATAGTAACTAACATAAAATACTCC
Lolium_perenne					CAAT-----AAATAAACTATCAACCTTCAAAAAAGTTTAATTAATTTAATTACTAT------A-TTAGAATTAGATTAGCAATATA------TTTCTTTCCTTTAGAATTAGATTAGCAATATATTTCTTTCCTTAAGAAAAAAAAAGAACTATAGTAACTAACATAAAATACTCC
Deschampsia_antarctica					CAATAAAGAAAATAAACTATCAACCTTCAAAAAAGTTTAATTAATTTAATTACTAT------A-TTAGAATTAGATTAGCAATATA------TTTTTTTCCGTACCA-------------------------------AAAAAAAATGAACTAT-GTAACTAA-ATAAACTACTCC
Puccinellia_nuttalliana					CAAT-----AAATAAACTATCAACCTTCAAAAAAGTTTAATTAATTTAATTACTAT------ATTTAGAATTATATTAGCAATTTA-------TTTTTTCCGTAAC--------------------------------AAAAAAAAGGAACTAT-GTAACTAA-ATAAACTATTCC
Dactylis_glomerata					C-AA---------------TCAACCTTCAAAAAAGTTTAATTAATTTAATTACTAT------A-TTAGAATTAGATTAGCAATATA------TTTTTTTTCGTAAC--------------------------------AAAAAAAATGAACTAT-GTAACTAA-ATAAACTACTCC
Kengyilia_melanthera					CAAT-----AAATAAACTATCAACCTCCAAAAAAGTTTAATTAATTTAATTACTA------GAATTAGAATTCTATTAGTA--ATATATTTTATTTTTTCAGTACC--------------------------------AAAAACAATTAACTATA-TAACTAAC------------
Helictochloa_hookeri					CAAT-----AAATAAACTATCAACCTTCAAAAAAGTTTAATTAATTTAATTACTATATTAGAAATTCGAATTAGATTACCAATCTA------TTTTTTTCCGTAACAA--------------------------------------------------------------------
Lamarckia_aurea	2				AAATGAACTAT-GTAACTAA-ATAAACTACTCCAATAAAAAGATTGAAAGTTTTTGG-------------------------------------TAGTTA-TAGAATTCTCGTACTTCCGTACCTCTTCGACTCGAATACAAAAAAAAG-T
Ventenata_macra		145 (Deletion)	8612	8756	AA-------------------------------------------------------------------------------------------------------------------------------------------------GT-T
Scolochloa_festuaceae					AAATGAACTAT-GTAACTAA-ATAAACTACTCCAATGAAAAGATTGAAAGTTTTTGG-------------------------------------TAGTTA-TAGAATTCTCGTACTTGCGTACTTCTTCGACTCGAATACAAAAAAAAAGT
Nephelochloa_orientalis					AA--GAACTAT-GTAACTAA-CGAAACTATTCCAATGAATAGATTAAAAGTTTTTGG-------------------------------------TAGTTA-TAGAATTCTCGTACTTCCGTACTTCTTCGACTCGAATACAAAAAAAAG-T
Holcus_lanatus					AAATGAACTAT-GTAAGTAA-ATAAACTATTCCAATGAAAAGATTGAAAGTTTTTGG-------------------------------------TAGTTA-TAGAATTCTCCTACTTCCGTACTTCTTCGACTCAAATACAAAAAAAGT--
Poa_subgen_Stenopoa					1-----------------------------TCCAATGAATAGATTGAAAGTTTTTGG-------------------------------------TAGTTA-TAGAATTCTCGTACTTCCGTACTTCTTCGACTGGAATACAAAAAAAAG-T
Festuca_ovina					AAATGAACTAT-GTAACTAA-ATAAACTATTCCGATGAAAAGATTGAAAGTTTTTAAAATAAACTACTCCGATGAAAAGATTGAAAGTTTTTAGTAGTTA-TAGAATTCTCGTACTTCCGTACTTCTTCGACTCGAATAAAAAAAAAG--T
Desmazeria_sicula					1--------------------ATAAACTACTCCAATGAAAAGATTGAAAGTTTTTGG-------------------------------------TAGTTA-TAGAATTCTCGTACTTGCGTGCTTCTTCGACTCGAATAC-AAAAAAAG-T
Catapodium_rigidum					1--------------------ATAAACTACTCCAATGAAAAGATTGAAAGTTTTTGG-------------------------------------TAGTTATTAGAATTCTCGTACTTGCGTGCTTCTTCGACTCGAATACAAAAAAAAG-T
Catapodium_marinum					1--------------------ATAAACTACTCCAATGAAAAGATTGAAAGTTTTTGG-------------------------------------TAGTTATTAGAATTCTCGTACTTGCGTGCTTCTTCGACTCGAATACAAAAAAAAG-T
Castellia_tuberculosa					AAATGAACTAT-GTAACTAA-ATCAACTACTCCAATGAAAAGATTGAAAGTTTTTGA-------------------------------------TAGTTA-TAGAATTCTCGTACTTCCGTACTTCTTCGACTCGAATAAAAAAAAAAGTA
Ammochloa_palestina					AAATGAACTAT-GTAACTAA-ATAAACTACTCCAATGAAAAGATTGCAAATTTTTGG-------------------------------------TAGTTA-TAGAATTCTCATACTTCCGTACTTCTTCGACTCGAATACAAAAAAAAG-T
Alopecurus_arundinaceus					AAAGGAACTAT-GTAACTAA-ATAAACTATTCCAATGAATAGATTGAAAGTTTTTGG-------------------------------------TAGTTA-TAGAATTCTCGTACTTCCGTACTTCTTCGACTCGAATACAAAAAAAAG-T
Poa_palustris					1-----------------------------TCCAATGAATAGATTGAAAGTTTTTGG-------------------------------------TAGTTA-TAGAATTCTCGTACTTCCGTACTTCTTCGACTGGAATACAAAAAAAAG-T
Festuca_ovina_NC_019649					AAATGAACTAT-GTAACTAA-ATAAACTATTCCGATGAAAAGATTGAAAGTTTTTAAAATAAACTACTCCGATGAAAAGATTGAAAGTTTTTAGTAGTTA-TAGAATTCTCGTACTTCCATACTTCTTCGACTCGAATAAAAAAAAAG--T
Festuca_altissima					AAAAGAACTAT-GTAACTAA-ATAAACTACTCCAATGAAAAGATTGAAAGTTTTTGG-------------------------------------TAGTTA-TAGAATTCTCGTACTTCCGTACTTCTTCGACTCGAATACAAAAAAAAG--
Festuca_arundinacea					AAAAGAACTATAGTAACTAACATAAACTACTCCAATGAAAAGATTGAAAGTTTTTGA-------------------------------------TAGTTA-GAGAATTCTCGTACTTCCGTACTTCTTCGCCTTGAATACAAAAAAAAG--
Festuca_pratensis					AAAAGAACTATAGTAACTAACATAAAATACTCCAATGAAAAGATTGAAAGTTTTTGA-------------------------------------TAGTTA-GAGAATTCTCGTACTTCCGTACTTCTTCGCCTTGAATACAAAAAAAAG--
Lolium_multiflorum					AAAAGAACTATAGTAACTAACATAAAATACTCCAATGAAAAGATTGAAAGTTTTTGA-------------------------------------TAGTTA-GAGAATTCTCGTACTTCCGTACTTCTTCGCCTTGAATACAAAAAAAAG--
Lolium_perenne					AAAAGAACTATAGTAACTAACATAAAATACTCCAATGAAAACATTGAAAGTTTTTGA-------------------------------------TAGTTA-GAGAATTCTCGTACTTCCGTACTTCTTCGCCTTGAATACAAAAAAAAG--
Deschampsia_antarctica					AAATGAACTAT-GTAACTAA-ATAAACTACTCCAATGAAAAGATGGAAAGTTTTTAG-------------------------------------TAGTTA-TAGAATTCTCGTACTTTCGTACTTCTTCGACTCGAATACAAAAAAAAAGT
Puccinellia_nuttalliana					AAAGGAACTAT-GTAACTAA-ATAAACTATTCCAATGAAAAGATTGAAAGTTTTTGG-------------------------------------TAGTTA-TAGAATTCTTGTACTTCCGTACTTCTGCGACTCGAATACAAAAAAAAG-T
Dactylis_glomerata					AAATGAACTAT-GTAACTAA-ATAAACTACTCCAATAAAAAGATTGAAAGTTTTTGG-------------------------------------TAGTTA-TAGAATTCTCGTACTTCCGTACCTCTTCGACTCGAATACAAAAAAAAG-T
Kengyilia_melanthera					CAATTAACTATA-TAACTAAC--------------------------------------TAAACTATTCCAATGAAAAGATTGAAAGTTTTTGGTAGTTA-TAGAATTCT--------CGTACTTCTTCGACTCGAATACCAAAAGGA---AGAAAAAAAATATGA----------CTAAGTGATTTATAGTAGAGGCAT-TCCTGA
Helictochloa_hookeri					---------------------------------------------------------AAAAAACTATTCCAATGAAAAGATTGAAAGTTTTTGGTAGTTA-TAGAATTCTCGTACTTCCGTACTTCTTCAACTCAAATACAAAAAAAA-GTAAGAAAAAAATATGA----------TTAAGTGATTTATAGTAGAGGCATATCCTGA
Lamarckia_aurea	3	132	8781	8912	TGAA-TTAAGTGATTTATAATAGAGGCAGATCCTCAATGTGACTGATAGACCCCATTTTTTCATGAAAATAAAGATATTCC-----A--------------------TTTGACTGGAATTAAGACTTTAATT
Ventenata_macra					TGAATTAAGTGA-TTTATAGTAGAGGCATATCCTGAATGTGCCTAATAGACACAATTTTTTCATGAAAATAAAGATATTCA-----A--------------------TTTGACTGGACTTAAGACTTT-ATT
Scolochloa_festuaceae					TGAA-TTAAGTGA-TTATAGTAGAGGCATATCCTGAATGTGACTGATAGACCCAATTTTTTCATGAAAATAAAGATATTCA-----A--------------------TTTGACTGGACTTAAGACTTT-ATT
Nephelochloa_orientalis					TGAATTAAGTGA-TTTATAGTGGAGGCATATCCTGAATGTGCCTGATAGACACAATTTTTTCATGAAAATAAAGATATTCA-----A--------------------TTTGACTGGACTTAAGACTTT-ATT
Holcus_lanatus					TGAA-TTAAGTGA-TTATAGTAGAGGCATATACTGAATGCGGCTGATAGACCCCATTTTTTCATGAAAATAAAGATATTCA-----A--------------------TTTGACTGGACTTAAGACTTT-ATT
Poa_subgen_Stenopoa					TGAA----------TTATAGTAGAGGCATATCCTGAATGTGCCTGATAGACACAATTTTTTCATG-------------------------------------------TTGACTGGACTTAAGACTTT-ATT
Festuca_ovina					TGAT----------TTATAGTAGAGGCATATCCTGAATGTGACTGATAGACCCAATTTTTTCATGAAAATAAAGATATTCA-----A--------------------TTTGACTGGGCTTAAGACTTT-ATT
Desmazeria_sicula		127 (Deletion)	8783	8909	TG-------------------------------------------------------------------------------------------------------------------------------ATT
Catapodium_rigidum		127 (Deletion)	8783	8909	TG-------------------------------------------------------------------------------------------------------------------------------ATT
Catapodium_marinum		127 (Deletion)	8783	8909	TG-------------------------------------------------------------------------------------------------------------------------------ATT
Castellia_tuberculosa					TGAT----------TTATAGTAGAGGCATATCCTGAATGTGACTGATAGACCCAATTTTTTCATGAAAATAAAGATATTCA-----A--------------------TTTGACTGGACTTAAGACTTT-ATT
Ammochloa_palestina					TGAA-TTAAGTGGTTTATAGTGGAGGCATATCCTAAATGTGACTGATAGACCCTATTTTATCATGAAAATAAAGATATTCA-----ATTTGACTGGACTTAATACTTTTTGACTGGACTTAAGACTTTAATT
Alopecurus_arundinaceus					TGAATTAAGTGATTTTATAGTAGAGGCATATCCAGAATGTGCCTGATAGACACTATTTTTTCATGAAAATAAAGATATTCA-----A--------------------ATTAACTGGACTTAAGACTAT-ATT
Poa_palustris					TGAA----------TTATAGTAGAGGCATATCCTGAATGTGCCTGATAGACACAATTTTTTCATG-------------------------------------------TTGACTGGACTTAAGACTTT-ATT
Festuca_ovina_NC_019649					TGAT----------TTATAGTAGAGGCATATCCTGAATGTGACTGATAGACCCAATTTTTTCATGAAAATAAAGATATTCA-----A--------------------TTTGACTGGACTTAAGACTTT-ATT
Festuca_altissima					TGAA----------TTATAGTAGAGGCATATCCTGAATGTGACTGATAGACCCAATTTTTTCATGAAAATAAAGATATTCA-----A--------------------TTTGACTGGACTTAAGACTTT-ATT
Festuca_arundinacea					TGAATTTAAGTGATTTATAGTAGAGGCATATCCTAAATGTGACTGATAGACCCAATTTTTTCATGAAAATAAAGATATTCAATTTGA--------------------TTTGACTGGACTTAAGACTTT-ATT
Festuca_pratensis					TGAATTTAAGTGATTTATAGTAGAGGCATATCCTAAATGTGACTGATAGACCCAATTTTTTCATGAAAATAAAGATATTCAATTTGA--------------------TTTGACTGGACTTAAGACTTT-ATT
Lolium_multiflorum					TGAATTTAAGTGATTTATAGTAGAGGCATATCCTAAATGTGACTGATAGACCCAATTTTTTCATGAAAATAAAGATATTCAATTTGA--------------------TTTGACTGGACTTAAGACTTT-ATT
Lolium_perenne					TGAATTTAAGTGATTTATAGTAGAAGCATATCCTAAATGTGACTGATAGACACAATTTTTTCATGAAAATAAAGATATTCAATTTGA--------------------TTTGACTGGACTTAAGACTTT-ATT
Deschampsia_antarctica					TGAA-TTAAGTAA-TTATAGTAGAGGCATATCCTGAATGTGACTGATAGACCCAATTTTTTCATGAAAATAAAGATATTCA-----A--------------------TTTGACTAGACTTAAGACTTT-ATT
Puccinellia_nuttalliana					TGATTTT-------TTATAGTAGAGACATATCCTAAATATGACTTATAGAACCCATTTTTTCATGAAAATAAAGATATTCA-----A--------------------TTTGGCTGGACTTAATACTTT-ATT
Dactylis_glomerata					TGAA-TTAAGTGATTTATAATAGAGGCAGATCCTCAATGTGACTGATAGACCCCATTTTTTCATGAAAATAAAGATATTCC-----A--------------------TTTGACTGGAATTAAGACTTTAATT
Kengyilia_melanthera					-----CTAAGTGATTTATAGTAGAGGCAT-TCCTGAATGTGCCTGATAGATCCCATTTTTTCATGAAAATAAAGAGAGTCAA-------------------------TTTGACTGGACTTAAGACTTT-ATT
Helictochloa_hookeri					-----TTAAGTGATTTATAGTAGAGGCATATCCTGAATGTTACTGATAGACCCCATTTTTTCATGAAAATAAAGATATTCAA-------------------------TTTGACTGGACTTAAGACTTT-ATT
Lamarckia_aurea	4	98	8911	9008	TTACGTTTTCTGAGAAATAAAGTGAATGCTTAGAAATGCATCTAATCTAAGAGTTCATAAGATACCATGATTCTC-------TTTAATAA------AT
Ventenata_macra					TTAAGTTTTCTGAGAAAGAAAGTGAATGCTTAGAAATGTATCTAATCTAAGAGTTCATAAGATACCATTATTCTC-------TTTAATAAATTAATAT
Scolochloa_festuaceae					TTATGTTTTCTGAGAAAGAAAGTGAATGCTTAGAAATGCATCTAATCTAAGAGTTCATAAGATACCATTATTCTC-------TTTAATAA------AT
Nephelochloa_orientalis					TTAAGTTTTCTGAGAAAGAAAGTGAATGCTTAGAAATGCATCTAATCTAAGAGTTCATAAGATACCATTATTCTC-------TTTAATAAATTAATAT
Holcus_lanatus					TTATGTTTTCTGAGAAAGAAAGTGAATGCTTAGAAATGCATCTAATCTAAGAGTTCATAAGATACCATTATTCTC-------TTTAATAA------AT
Poa_subgen_Stenopoa					TTAAGTTTTCTGAGAAAGAAAGTGAATGCTTAGAAATGCATCTAATCTAAGAGTTCATAAGATACCATTATTCTC-------TTTAATAATTTAATAT
Festuca_ovina					TTATGTTTTCTGAGAAAGAAAGTGAATGCTTAGAAATGCGTCTAATCTAAGAGTTCATAAGATACCATTATTCTTTATTCTATTTAATAA------AT
Desmazeria_sicula		93 (Deletion)	8914	9006	TTA---------------------------------------------------------------------------------------------AT
Catapodium_rigidum		93 (Deletion)	8914	9006	TTA---------------------------------------------------------------------------------------------AT
Catapodium_marinum		93 (Deletion)	8914	9006	TTA---------------------------------------------------------------------------------------------AT
Castellia_tuberculosa					TTATGTTTTCTGAGAAAGAAAGTGAATGCTTAGAAATGCATCTAATCTAAGAGTTCATAAGATACCATTATTCTC-------TTTAATAA------AT
Ammochloa_palestina					TTACGTTTTCTGAGAAATAAAGTGAATGCTTAGAAATGCATCTAATCTAAGAGTTCATAAGATACCATTATTCTC-------TTTAATAA------AT
Alopecurus_arundinaceus					TTAAGTTTTCTGAGAAAGAAAGTGAATGCTTAGAAATGCATCTAATCTAAGAGTTCATAAGATACCATTATTATC-------TTTAATAAATTAATAT
Poa_palustris					TTAAGTTTTCTGAGAAAGAAAGTGAATGCTTAGAAATGCATCTAATCTAAGAGTTCATAAGATACCATTATTCTC-------TTTAATAATTTAATAT
Festuca_ovina_NC_019649					TTATGTTTTCTGAGAAAGAAAGTGAATGCTTAGAAATGCATCTAATCTAAGAGTTCATAAGATACCATTATTCTC-------TTTAATAA------AT
Festuca_altissima					TTATGTTTTCTGAGAAAGAAAGTGACTGCTTAGAAATGCATCTAATCTAAGAGTTCATAAGATACCATTATTCTC-------TTTAATAA------AT
Festuca_arundinacea					TTATGTTTTCTGAGAAAGAAAGTGAATGCTTAGAAATGCCTCTAATCTAAGAGTTCATAAGATACCATTATTCTC-------TTTAATAA------AT
Festuca_pratensis					TTATGTTTTCTGAGAAAGAAAGTGAATGCTTAGAAATGCCTCTAATCTAAGAGTTCATAAGATACCATTATTCTC-------TTTAATAA------AT
Lolium_multiflorum					TTATGTTTTCTGAGAAAGAAAGTGAATGCTTAGAAATGCCTCTAATCTAAGAGTTCATAAGATACCATTATTCTC-------TTTAATAA------AT
Lolium_perenne					TTATGTTTTCTGAGAAAGAAAGTGAATGCTTAGAAATGCCTCTAATCTAAGAGTTCATAAGATACCATTATTCTC-------TTTAATAA------AT
Deschampsia_antarctica					TTATGTTTTCTGAGAAAAAAAGTGAATGCTTAGAAATGCATCTAATCTAAGAGTTCATAAGATACCATTATTCTC-------TTTAATAA------AT
Puccinellia_nuttalliana					TTATGTTTTCTGCGAAAGAAAGTGAATGCTTAGAAATGGATCTAATCTAAGAGTTCATAAGATACCATTATTCTC-------TTTAATAAATTAATAT
Dactylis_glomerata					TTACGTTTTCTGAGAAATAAAGTGAATGCTTAGAAATGCATCTAATCTAAGAGTTCATAAGATACCATTATTCTC-------TTTAATAA------AT
Kengyilia_melanthera					TTATGTTTTATGAGAAAGA-------------------------------------ATAAGATATCATTATTCTCT----------------------
Helictochloa_hookeri					TTATGTTTTCAGAGAAAACAAGTGAATGCTTAGAAATGCATCTACTCTAAGAGTTCATAAGATACCATTATTTTC-------TTTAATAAAT------
Lamarckia_aurea	5	137	11227	11363	TTTTATTTTCATTTTTCCCTTAAAAGAGAGGC-------TTTGAAA-TAGGAGTCATGGAATAATGCTGAATTGAAATGTTTATTTCTAT----------------------AGTATAAGAAAAACAAATCGAATCA
Ventenata_macra					TTTTATTTTCATTTTTCCCTTAAAAGATAGGC-------TTTGAAA-TAGGAGTCATGGAATAATGCTGAATTGAAATGTTTATTTCTAT----------------------AGTATAAGAAAAACAAATCGAATCA
Scolochloa_festuaceae					TTTTATTTTCATTTTTCCCTTAAAAGATAGGC-------TTTGAAA-TAGGAGTCATGGAATAATGCTGAATTGAAATGTTTATTTCTAT----------------------AGTATAAGAAAAACAAATCGAATCC
Nephelochloa_orientalis					TTTTATTTTCATTTTTCCCTTAAAAGATAGGC-------TTTGAAA-TAGGAGTCATGGAATAATGCTGAATTGAAATGTTTATTTCTAT----------------------AGTATAAGAAAAACAAATCGAATCA
Holcus_lanatus					TTTTATTTTCATTTTTCCCTTAAAAGATAGGC-------TTTGAAA-TAGGA------GAATAATGCTGAATTGAAATGTTTATTTCTAT----------------------AGTATAAGAAAAACAAATCGAATCA
Poa_subgen_Stenopoa					TTTTATTTTCATTTTTCCCTTAAAAGATAGGC-------TTTGAAA-TAGGAGTCATGGAATAATGCTGAATTGAAATGTTTATTTCTATAGTATAATAAAAACATTGGAAAAGTATAAGAAAAACAAATCGAATCA
Festuca_ovina					TTTTATTTTCATTTTTCCCTTAAAAGATAGGC-------TTTGAAA-TAGGACTCATGAAATAATGCTGAATTGAAATGTTTATTTCTAT----------------------AGTATAAGAAAAACAAATCGAATCA
Desmazeria_sicula		131 (Deletion)	11230	11360	TTT-----------------------------------------------------------------------------------------------------------------------------------TCA
Catapodium_rigidum		131 (Deletion)	11230	11360	TTT-----------------------------------------------------------------------------------------------------------------------------------TCA
Catapodium_marinum		131 (Deletion)	11230	11360	TTT-----------------------------------------------------------------------------------------------------------------------------------TCA
Castellia_tuberculosa					TTTTATTTTCTTTTTTCCCTTAAAAGATAGGC-------TTTGAAA-TAGGAGTCATGGAATAATGCTGAATTGAAATGTTTATTTCTAT----------------------AGTATAAGAAAAACAAATCGAATCA
Ammochloa_palestina					TTTTATTTTCATTTTTCCCTTAAAAGATAGGC-------TTTGAAA-TAGGAGTCATGGAATAATGCTGAATTGAAATGTTTATTTCTAT----------------------AGTATAAGAAAAACAAATCGAATCA
Alopecurus_arundinaceus					TTTTAGTTTCATTTTTCCCTTAAAAGATAGGC-------TTTGAAA-TAGGAGTCATGCAATAATGCTGAATTGAAATGTTTATTTCTAT----------------------AGTATAAGAAAAACAAATCGAATCA
Poa_palustris					TTTTATTTTCATTTTTCCCTTAAAAGATAGGC-------TTTGAAA-TAGGAGTCATGGAATAATGCTGAATTGAAATGTTTATTTCTATAGTATAATAAAAACATTGGAAAAGTATAAGAAAAACAAATCGAATCA
Festuca_ovina_NC_019649					TTTTATTTTCATTTTTCCCTTAAAAGATAGGC-------TTTGAAA-TAGGACTCATGAAATAATGCTGAATTGAAATGTTTATTTCTAT----------------------AGTATAAGAAAAACAAATCGAATCA
Festuca_altissima					TTTTATTTTCATTTTTCCCTTAAAAGATAGGC-------TTTCAAA-TAGGAGTCATGGAATAATGCTGAATTGAAATGTTTATTTCTAG----------------------AGTATAAGAAAAACAAATCGAATCA
Festuca_arundinacea					TTTTATTTTCATTTTTCCCTTAAAAGATAGGCTTTCAAATTTCAAA-TAGGAGTCATGGAATAATGCTGAATTGAAATGTTTATTTCTAG----------------------AGTATAAGAAAAACAAATCGAATAA
Festuca_pratensis					TTTTATTTTCATTTTTCCCTTAAAAGATAGGCTTTCAAATTTCAAA-TAGGAGTCATGGAATAATGCTGAATTGAAATGTTTATTTCTAG----------------------AGTATAAGAAAAACAAATCGAATAA
Lolium_multiflorum					TTTTATTTTCATTTTTCCCTTAAAAGATAGGCTTTCAAATTTCAAA-TAGGAGTCATGGAATAATGCTGAATTGAAATGTTTATTTCTAG----------------------AGTATAAGAAAAACAAATCGAATAA
Lolium_perenne					TTTTATTTTCATTTTTCCCTTAAAAGATAGGCTTTCAAATTTCAAA-TAGGAGTCATGGAATAATGCTGAATTGAAATGTTTATTTCTAG----------------------AGTATAAGAAAAACAAATCGAATAA
Deschampsia_antarctica					TTTTATTTCCATTTTTTCCTTAAAAGATAGGC-------TTTGAAA-TAGGAGTCATGGAATAATGCTGAATAGAAATGTTTATTTCTAT----------------------AGTATAAGAAAAACAAATCGAATCA
Puccinellia_nuttalliana					TTTTATTTTCATTTTTCCCTTAAAAGATAGGC-------TTTGAAATTAGGAGTCATGGAATAATGCTGAATTGAAATGTTTATTTCTAT----------------------AGTATAAGAAAAACAAATCGAATCA
Dactylis_glomerata					TTTTATTTTCATTTTTCCCTTAAAAGAGAGGC-------TTTGAAA-TAGGAGTCATGGAATAATGCTGAATTGAAATGTTTATTTCTAT----------------------AGTATAAGAAAAACAAATCGAATCA
Kengyilia_melanthera					TTTTATTTTCATTTTTCCCTTAAAAGATAGACTTTGAAA--------TAGGAGTCTTGGAATAATGCTGAATTCAAAGGTTTATTTCTAT----------------------AGTATAAGAAAAACAAATCGAATCA
Helictochloa_hookeri					TTTTATTTTCATTTTTCCCTTAAAAGATAGGCTTT--------AAAATAGGAGTCATGGAATAATGCTGAATTGAAATGTTTATTTCT---------------------TATAGTATAAGAAAAACAAATCGAATCA
Lamarckia_aurea	6				GTC-------TAGTACGGTATCCCTTA----C-------TATTCTTACCCTTC-----TTTTGCATCCCACTC-AAAAAAGGGGGCGCTACAGAGGCAGAAAGCACTACCTAAATAGGGTATTCACTAAAACAAACAAACCGGGTATTCACTAAGACAAACAACTGACAAACTTCTTTTAAAGAGAA---------GGCCTGTGCCTTT-CTTTCATTTCATTTTTTTTTTCCACAGGGTCAG
Ventenata_macra					GTC-------TAGTATCGTATCCCTTA----CTATA------TCTTACCCTTCTTTTGTTTTGCATCCCACTCAAAAAAAGGAGGCGCTACATAGGCGGAAAGGGCTACCT-------------------------AAATCGGGTATTCACTGAGACAAATAACTGGCAAACTGCTTTTAAAGAGAA---------GGACTGTGCCTTT-CTTTC-----------ATTTTTAGCAGGGTCGG
Scolochloa_festuaceae					GTC-------TAGTACCGTATCCCTTA----CTAT-------TCTTACCCTTC-----TTTTGCATCCCACTCAAAAAAAGGGGGCGCTACAGAGGCGGAAAGGGCTACCTAAATCGGGTATTCACTAAGACAAACAAATCGGGTATTCACTAAGACAAACAACTGGCAAACTGCTTTTAAAGAGCA---------GGACTGTGCCTTT------CTTTCATTTTTCTTTTCCGCAGGGTCGG
Nephelochloa_orientalis					GTC-------TAGTATCGTATCCCTTA----CTAT-------TATTACCCTTC-----TTTTGCATCCCACTCAAAAAAAGGAGGCGCTACATAGGCGGAAAGGGCTACCT-------------------------AAATCGGGTATTCACTGAGACAAATAACTGTCAAACTGCTTTTAAAGAGAA---------GGACTGTGCCTTT-CTTTCATTTCATTTTTATTTTCCGCAGGGTCGG
Holcus_lanatus					GTC-------TAGTACCGGATTCCTTAGTATTTAT-------TCTTACCCTTC-----TTTTGCATCCCACTC-AAAAAAGGGGCCGCTACAGAGGCGGAAAGGGCTACCT-------------------------AAATCGAGTATTCACTAAGACAAACAACTGGCAAACTGCTTTTAAAGAGAA---------GGACTGTGCCTTT-CTTTCATTTCCTTTTTCTTTTCCGCAGGGTCGG
Poa_subgen_Stenopoa					ATC-------TAGTACCGTATCCCTTA----CTATAACTAT-TCTTACCCTTC-----TTTTGCATCCCACTC-AAAAAAGGGGGCGCTACATAAGTGGAAAGGGCTACCT-------------------------AAATCGGGTATTCACTGAGACAAATAACTGGCAAACTGCTTTTAAAGAGCA---------GAACTGTGCTTTT-C-----TTTCATTTTTATTTTCCGCAGGATCGG
Festuca_ovina		237 (Deletion)	15418	15654	GTT---------------------------------------------------------------------------------------------------------------------------------------------------------------------------------------------------------------------------------------------CGG
Desmazeria_sicula					GTC-------TAGTACCGGATCCCTTA----CTAT-------TCTTACCCTTC-----TTTTGCATCCCACTCAAAAAAAGGGGGCGCTACAGAGGCGGAAAGGGCTACCT-------------------------AAATTGGGTAGTCACTAAAACAAACAACTGACAAACTGCTTTTAAAGAGAA---------GGACTGTGCCTTT-CTTTCATTTCATTTTTATTTTCAGCAGGGTCAG
Catapodium_rigidum					GTC-------TAGTACCGGATCCCTTA----CTAT-------TCTTACCCTTC-----TTTTGCATCCCACTCAAAAAAAGAGGTCGCTACAGAGGCGGAAAGGGCTACCT-------------------------AAATCGGGTAGTCACTAAGACAAACAACTGACAAACTGCTTTTAAAGAGAA---------GGACTGTGCCTTT-CTTTCATTTCATTTTTATTTTCCGCAGGGTCAG
Catapodium_marinum					GTC-------TAGTACCGGATCCCTTA----CTAT-------TCTTACCCTTC-----TTTTGCATCCCACTCAAAAAAAGAGGTCGCTACAGAGGCGGAAAGGGCTACCT-------------------------AAATCGGGTAGTCACTAAGACAAACAACTGACAAACTGCTTTTAAAGAGAA---------GGACTGTGCCTTT-CTTTCATTTCATTTTTATTTTCCGCAGGGTCAG
Castellia_tuberculosa					GTTTTAGTTATAGTACCGTATCCCTTA----CTATTACTATATCTTACCCTTC-----TTTTGCATCCCCCTCAAAAAAAGGGGGCGCTACAGAGGCGGAAAGGGCTACCT-------------------------AAATCGGGTATTTACTAAGACAAACAACTGACAAACTGCTTTTAAAGAGCA---------GGACAGTGCCTTT------CTTTCATTTTTCTTTTCCACAAGG-TCG
Ammochloa_palestina					GTC-------TAGTACCGTATCCCTTA----CTATACTATATCTTAACCCTTC-----TTTTGCATCC-------AAAAGCGGGGCGCTACAGAGGCGGAAGG-GCTACCTA------------------------ATATAGGGTATTCACTAAGACAAACAACTGGCAAACTGCTTTTAAAGAGAA---------GGACTGTGCCTTT-CCTTCATTTCATTTTTCTTTTCCAAAGGGTCGG
Alopecurus_arundinaceus					GTC-------TAGTACCGTATCCCTTA----CTATA------TCTTACCCTTC-----TTTTGCATCCCACTCAAAAAAAGGGGGCGCTACATAGGCGGAAAGGGCTACCT-------------------------AAATCGGGTATTCACTGAGACAAATAACTGGCAAACTGCTTTTAAAGAGAA---------GGACTGTGCCTTT-CTTTCATTTCATTTTTATTTTCCGCAGGGTCGG
Poa_palustris					ATC-------TAGTACCGTATCCCTTA----CTATAACTAT-TCTTACCCTTC-----TTTTGCATCCCACTC-AAAAAAGGGGGCGCTACATAAGTGGAAAGGGCTACCT-------------------------AAATCGGGTATTCACTGAGACAAATAACTGGCAAACTGCTTTTAAAGAGCA---------GAACTGTGCTTTT-CTTTCATTTCATTTTTATTTTCCGCAGGATCGG
Festuca_ovina_NC_019649		237 (Deletion)	15418	15654	GTT---------------------------------------------------------------------------------------------------------------------------------------------------------------------------------------------------------------------------------------------CGG
Festuca_altissima					GTC-------TAGTACCGTATCCCTTA----CTAT-------TCTTACCCTTC-----TTTTGCATCCCACTCAAAAAAAGGGGGCGCTACAGAGGCGGAAAGGGCTACCTAAATCGGGTATTTACTAAGACAAACAAATCGGGTATTCACTAAGACAAACAACTGGCAAACTGCTTTTAAAGAGCA---------GGACTGTGCCTTT-CTTTCATTTCATTTTTCTTTTCCGCAAGGTCGG
Festuca_arundinacea					GTC-------TAGTACCGTATCCCTTA----CTAT-------TCTTACCCTTC-----TTTTGCATCCCACTCAAAAAAAGGGGGCGCTACAGAGCCGGAAAGGGCTACCTAAATCAGGTATTTACTAAGACAAACAAATCGGGTATTCACTAAGACAAACAACTGGCAAACTGCTTTTAAAGAGGA---------GGACTGCGCCTTTACTTTCATTTCATTTTTCTTTTCCGCAAGGTCGG
Festuca_pratensis					GTC-------TAGTACCGTATCCCTTA----CTAT-------TCTTACCCTTC-----TTTTGCATCCCACTCAAAAAAAGGGGGCGCTACAGAGCCGGAAAGGGCTACCTAAATCAGGTATTTACTAAGACAAACAAATCGGGTATTCACTAAGACAAACAACTGGCAAACTGCTTTTAAAGAGGA---------GGACTGCGCCTTTACTTTCATTTCATTTTTCTTTTCCGCAAGGTCGG
Lolium_multiflorum					GTC-------TAGTACCGTATCCCTTA----CTAT-------TCTTACCCTTC-----TTTTGCATCCCACTCAAAAAAAGGGGGCGCTACAGAGCCGGAAAGGGCTACCTAAATCAGGTATTTACTAAGACAAACAAATCGGGTATTCACTAAGACAAACAACTGGCAAACTGCTTTTAAAGAGGA---------GGACTGCGCCTTTACTTTCATTTCATTTTTCTTTTCCGCAAGGTCGG
Lolium_perenne					GTC-------TAGTACCGTATCCCTTA----CTAT-------TCTTACCCTTC-----TTTTGCATCCCACTCAAAAAAAGGGGGCGCTACAGAGCCGGAAAGGGCTACCTAAATCAGGTATTTACTAAGACAAACAAATCGGGTATTCACTAAGACAAACAACTGGCAAACTGCTTTTAAAGAGGA---------GGACTGCGCCTTTACTTTCATTTCATTTTTCTTTTCCGCAAGGTCGG
Deschampsia_antarctica					GTC-------TAGTACCGTATCCCTTA----CTAT-------TCTTACCCTTC-----TTTTGCATCCCACTCAAAAAAAGGGAGCGCTACAGAGGCGGAAAGGGCTACCT-------------------------AAATGGGGTATTCACTAAGACAAACAACTGGCAAACTGCTTTTAAAGAGAA---------GGACTATGCCTTT-CTTTCATTTCATTTTTATTTTCCGCAGGGTCGG
Puccinellia_nuttalliana					GTC-------TAGTACCATATCCCTTA----CTATA------TCTTACCCTTC-----TTTTGCATCCCACTCAAAAAAAGGGGGCGCTACAGAGGAGGAAAGGGCTACCT-------------------------AAATCGGGTATTCATTGAGACAAATTACTGGCAAACTTCTTTTAAAGAGAATAAAGAAAAAGACTGTGCCTTT-------CTTTCATTTTGTTTTTCGCAGGGTCGG
Dactylis_glomerata					GTC-------TAGTACGGTATCCCTTA----C-------TATTCTTACCCTTC-----TTTTGCATCCCACTC--AAAAAGGGGGCGCTACAGAGGCGGAAAGCACTACCTAAATAGGGTATTCACTAAAACAAACAAACCGGGTATTCACTAAGACAAACAACTGACAAACTGCTTTTAAAGAGAA---------GGCCTGTGCCTTT-CTTTCATTTCATTTTTCTTTTCCACAGGGTCGG
Kengyilia_melanthera					GTC-------TAGTGCCGTATCCCTTACTATCT-----------------TACTCTTCTTTTGGATCCCACTCAAAAAAAGAGTGCGCTCCGGAGGCAGAAATAGAACTC----------GCCAACAGAGCTCCCAAAATTGGGTATTAACTGAGACAAACAACGGGCAAACTCTTTTTAAAGGGAAGGGAGAGGTAGACTGTCC-----CTTTCGTTTCATTTTTATTTTCCGCAGGGTAGG
Helictochloa_hookeri					GTC-------TAGTACCGTATCCCTTACTA-----------TTCTTACCCTTC-----TTTTGCATCCCACTCAAAAAACGGGGGCGCTACAGAGGCGGAAAGGGCTACCTA------------------------AAATAGGGTATTCACTAAGACAAACAACTGGCAAACTGCTTTTAAAGAG---------AAGGACTGTGCCTTT-CTTTCATTTCATTTTTCTTTTCGGCAGGGTCGG
Lamarckia_aurea	7	268	16834	17101	GCA----AAGGTTCATGACACTGAGCGGTTGGTATTTCTACTTGGATCGCTGGCCTTTACTTTAGGATTTAGATAGCCCCTCCCTCTCCCCTCTGGTCTAT----AAAATACTT-ACATCTCTTCTTACCATGCCAATAGCCTCTGAACCAAATCTATGTATTTCGATTAGG----------ATCCTATT------CTACGGTTACGACTACAATGATCATTATTTACTTT-GCGAGGACGTAAGTGTGCGAGACTGCTTTACTGAAT
Ventenata_macra					CCAACCAAAGGTTCATCACACTGAGCGGTTGGTACTTCTACTTGGATCGTTTGCCTTTACTTTAGGATTTAGATAGCCCCTCCC------CTCTCTCTGGTCTGTAAAATACTTA-CATCTCTTCTTACCATGCCAATAGCGTCTGAACCAAATGTATGTATTTCGATTAGG----------ATACTATT------CTACGGTTACGACTACAATGATCATTATTTACTTT-GCGAGGACGTAAGTGTGCGAGACTGTTGTACTGAAT
Scolochloa_festuaceae					CCA----AAGGTTCATGACACTGAGCGGTTGGTATTTCTACTTGGATCGCTGGCCTTTACTTTAGGATTTAGATAG-----CCC------CTCTGGTCTGT----AAAATACTTA-CATCTCTTCTTACCATGCCAATAGCGTCTGAACCAAATGTATGTATTTCGATTAGG----------ATCGTATT------CTACGGTTACGACTACAATGATCATTATTTACTTTAGCGAGGACATAAGTGTGCGATACTGCTGTACTGAAT
Nephelochloa_orientalis					CCAACCAAAGGTTCATGACACTGAGCGGTCGGTACTTCTACTTGGATCGCTTGCCTTTACTTTAGGATTTAGATAG-----CCC------CTCTCTCTGGTCTGTAAAATACTTA-CATCTCTTCTTACCATGCCAATAGCGTCTGAACCAAATGTATGTATTTCGATTAGG----------ATACTATT------CTACGGTTACGACTACAATGATCATTATTTACTTT-GCGAGGACGTAAGTGTGCGAGACTCCTGTACTGAAT
Holcus_lanatus					CCA----AAGGTTCATGACACTGAGTGGTTGGTACTTCTACTTGGATCGCTGGCCTTTACTTTAGGATTTAGATAGCCCC-TCT------CTCTGGTCTGT----AAAATACTTA-CATCTCTTCTTACCATGCCAATAGCGTCTAAACCAAATGTATGTATTTCAATTAGG----------ACCCTATT------CTACGGTTACGACTACAATGATCATTATTTACTTT-GGGAGGACGTAAGTGTGCGAGACTGCTATACTGAAT
Poa_subgen_Stenopoa		262 (Deletion)	16837	17098	CCA----------------------------------------------------------------------------------------------------------------------------------------------------------------------------------------------------------------------------------------------------------------------AAT
Festuca_ovina					CCA----AAGGTTCATGACACTGAGTCGTTGGTATTTCTACTTGGATCGCTGGCCTTTACTTTAGGATTTAGATAG------CC------CTTTGGTATGT----AAAATACTTA-CATCTCTTCTTACCATGCCAATAGCGTCTGAACCAAATGTATGTATTTCGATTAGA----------ATCCTATT------CTACGGTTACAACTACAATGATCATTATTTACTTT-GCGAGGGCATAAGTGTGCGAGACTGCTGTACCGAAT
Desmazeria_sicula					CCA----AAGGTTCATGACACTGAGCGGTTGGTATTTCTACTTGGATCGCTGGCCTTTACTTT-AATTAT------------------------------------------------------------------------------------------------------------------------------------------------------------------------------------------------------
Catapodium_rigidum					CCA----AAGGTTCATGACACTGAGCGGTTGGTATTTCTACTTGGATCGCTGGCCTTTACTTTAAATTAT------------------------------------------------------------------------------------------------------------------------------------------------------------------------------------------------------
Catapodium_marinum					CCA----AAGGTTCATGACACTGAGCGGTTGGTATTTCTACTTGGATCGCTGGCCTTTACTTTAAATTAT------------------------------------------------------------------------------------------------------------------------------------------------------------------------------------------------------
Castellia_tuberculosa					CCA----AAGGTTCATGACACTGAGCCGTTGGTATTTCTACTTGGATCGCTGGCCTTTACTTTAGGATTTAGATAG-----CCC------CTCTGGTATGTATGTAAAATACTTA-CATCTCTTCTTACCATGCCAATAGCGTCTGAACCAAATGTATATATTTCGATTAGG-----ATCCTATCCTATT------CTACGGTTACAACTACAATGATCATTATTTACTTT-GCGAGGGCATAAGTGTGCGAGACTGCTGTATTGAAT
Ammochloa_palestina					CCA----AAGGTTCATGACACTGAGCGGTTGGTATTTCTACTTGGATCGTTGGCCTTTACTTTAGGATTTAGATAGCCCCTCCC-CTCTCCTCTAGTATGT----AAAATACTTAACATCTCTTCTTACCATGCCAATAGCCTCTGAACCAAATGTATGTATTTCGATTAGG----------ATCCTATT------CTACGGTTACGACTACAATGATCATTATTTACTTT-GCGAGGACGTAAGTGTGCGAGACTGCTTTACTGAAT
Alopecurus_arundinaceus					CCAACCAAAGGTTCATGACACTGAGCGGTTGGTACTTCTACTTGGATCGCTTG-CTTTACTTTAGGATTTAGATAG-----CCC------CTCTCTCTGGTCTGTAAAATACTTA-CATCTCTTCTTACCATGCCAATAGCGTCTGAACCAAATGTATGTATTTCGATTAGG----------ATCCTATT------CTACGGTTACGACTACAATGATCATTATTTACTTT-GCGAGGACGTAAGTGTGCGAGACTGCTGTACTGAAT
Poa_palustris		262 (Deletion)	16837	17098	CCA----------------------------------------------------------------------------------------------------------------------------------------------------------------------------------------------------------------------------------------------------------------------AAT
Festuca_ovina_NC_019649					CCA----AAGGTTCATGACACTGAGTCGTTGGTATTTCTACTTGGATCGCTGGCCTTTACTTTAGGATTTAGATAG-----CCC------CTTTGGTATGT----AAAATACTTA-CATCTCTTCTTACCATGCCAATAGCGTCTGAACCAAATATATGTATTTCGATTAGA----------ATCCTATT------CTACGGTTACAACTACAATGATCATTATTTACTTT-GCGAGGGCATAAGTGTGCGAGACTGCTGTACCGAAT
Festuca_altissima					CCA----AAGGTTCATGACACTGAGCCGTTGGTATTTCTACTTGGATCGCTGGCCTTTACTTTAGGATTTAGATAG-----CCC------CTCTAGTCTGT----AAAATACTTA-CATCTCTTCTTACCATGCCAATAGCGTCTGAACCAAATGTATGTATTTCGATTAGG----------ATCCTATT------CTACGGTTACGACTACAATGATCATTATTTACTTT-GCGAGGACGTAAGTGTGCGAGACTGCTGTACTGAAT
Festuca_arundinacea					CCA----AAGGTTAATGACACTGAGCCGTTGGTATTTCTACTTGGATCGCTGGCCTTTACTTTAGGATTTAGATAGCCCCTCCC------CTCTGGTATAT----AAAATACTTA-CATCTTTTCTTACCATGCCAATAGCTTCTGAATCAAATGTATGTATTTCAATTAGG----------ATCCTATT------CTACGGTTACGACTACAATGATCATTATTTACTTT-GCGAGGACGTAAGTGCGCGAGACTGCTGTACTGAAT
Festuca_pratensis					CCA----AAGGTTAATGACACTGAGCCGTTGGTATTTCTACTTGGATCGCTGGCCTTTACTTTAGGATTTAGATAGCCCCTCCC------CTCTGGTATAT----AAAATACTTA-CATCTTTTCTTACCATGCCAATAGCTTCTGAATCAAATGTATGTATTTCAATTAGG----------ATCCTATT------CTACGGTTACGACTACAATGATCATTATTTACTTT-GCGAGGACGTAAGTGCGCGAGACTGCTGTACTGAAT
Lolium_multiflorum					CCA----AAGGTTAATGACACTGAGCCGTTGGTATTTCTACTTGGATCGCTGGCCTTTACTTTAGGATTTAGATAGCCCCTCCC------CTCTGGTATAT----AAAATACTTA-CATCTTTTCTTACCATGCCAATAGCTTCTGAATCAAATGTATGTATTTCAATTAGG----------ATCCTATT------CTACGGTTACGACTACAATGATCATTATTTACTTT-GCGAGGACGTAAGTGCGCGAGACTGCTGTACTGAAT
Lolium_perenne					CCA----AAGGTTAATGACACTGAGCCGTTGGTATTTCTACTTGGATCGCTGGCCTTTACTTTAGGATTTAGATAGCCCCTCCC------CTCTGGTATAT----AAAATACTTA-CATCTTTTCTTACCATGCCAATAGCTTCTGAATCAAATGTATGTATTTCAATTAGG----------ATCCTATT------CTACGGTTACGACTACAATGATCATTATTTACTTT-GCGAGGACGTAAGTGCGCGAGACTGCTGTACTGAAT
Deschampsia_antarctica					CCA----AAGGTTCATGACACTGAGCGGTTGGTATTTCTACTTGGATCGCTGGCCTTTACTTTAGGATTTAGATAG-----ACC------CTCTGGTCTGT----AAAATACTTA-CATCTCTTCTTACCATGCCAATAGCGTCTGAACCAAATGTATGTATTTCGATTAGGATAGGATCCTATCCTATT------CGACGGTTACGACTACAATGATCATTATTT------AAGAGGACGTAAGTGTGCGAGACTGCTGTACTGAAT
Puccinellia_nuttalliana					CCA----AAGGTTCATGACACTGAGCGGTTAGTACTTCCACTTGGATCGCTGGCCTTTACTTTAGGATTTAGATAG-----CCT------CCCTGGTCTGT----AAAATACTTATTATCTCTTCTTACGATGCCAATAGCGTCTAAACCAAATGTATGTATTTTTATTAGG----------ATCCTATTCTACTTCTACGGTTACGACTACAATGATCATTATTTACTTT-GCGAGGA---------GCGAGACTGCTGTACTGAAT
Dactylis_glomerata					GCA----AAGGTTCATGACACTGAGCGGTTGGTATTTCTACTTGGATCGCTGGCCTTTACTTTAGGATTTAGATAGCCCCTCCCTCTCCCCTCTGGTCTAT----AAAATACTT-ACATCTCTTCTTACCATGCCAATAGCCTCTGAACCAAATCTATGTATTTCGATTAGG----------ATCCTATT------CTACGGTTACGACTACAATGATCATTATTTACTTT-GCGAGGACGTAAGTGTGCGAGACTGCTTTACTGAAT
Kengyilia_melanthera					CCATTTGACAAGAAGGCTAATTCCCCTTTATTGAATCAGATGGAGAAGGTTCATGACACTGAGCCGTTGGTACTTCTACTTCGATCGCTCGCCTTTACTTTAGGATTTAGATAGTCCCTCT---------------GGTCTGTAAAAT-----AAATCTCTTCTTACCATGCTAATAGCGCCTGAACCAAATGTATTTATTTTGATTAGGA----------------TCCTATTCTACGGTTACGACTGCAATAATCATTATTTACTTT-GCGAGGACGTAAGTGTGACAGACTGC----------TAAAT
Helictochloa_hookeri					----CC--------------------------------------AAAAGTTCATGACACTGAGCGGTTGGTACTTCTACTTGGATCGCAGGCCTTTACTTTAGGATTTAGATAGCCCCTCT---------------GGTCTGTAAAATACTT-ACATCTCTTCTTACCACGCCAATAGCGTCTGAACCAAATGTATGTATTTCGATTAGGA----------------TCCTATTCTACGGTTACGACTACAATGATCATTATTTACTTT-GCGAGGACGTAAGTGTGCGAGACTGCTGTACTGAATTGAAT
Lamarckia_aurea	8	348 (Deletion)	17167	17514	ATTTAGATAGCCCCTCCCTCTCCCCTCTGGTCTAT----AAAATACTT-ACATCTCTTCTTACCATGCCAATAGCCTCTGAACCAAATCTATGTATTTCGATTAGG----------ATCCTATT------CTACGGTTACGACTACAATGATCATTATTTACTTT-GCGAGGACGTAAGTGTGCGAGACTGCTTTACTGAATCGTTTTATTATTGCTACAAT----ATACACTAGGGAATATAGGGGGTAACACTGTCCCTATAAAG------------------------------------------------------------------------------------------------------------------------------------…
Ventenata_macra		55 (Insert)	17385	17439	ATTTAGATAGCCCCTCCC------CTCTCTCTGGTCTGTAAAATACTTA-CATCTCTTCTTACCATGCCAATAGCGTCTGAACCAAATGTATGTATTTCGATTAGG----------ATACTATT------CTACGGTTACGACTACAATGATCATTATTTACTTT-GCGAGGACGTAAGTGTGCGAGACTGTTGTACTGAATAGTTTTATTATTCCTACAAT----ATACACTAG---------GGGGTAACACTGTCCCTAATAAATTCCTTTTTTTCCCTTTCTTTTTTGTTAAATTCTAAACAAAAAAAATTATGGAAATGTAAGATGTTT--CGCTCCCCCATTTATCATTAAGTCCGAGCCGTAGAGAAAG-----AGTGAGATGCATTTTAAA…
Scolochloa_festuaceae		55 (Insert)	17385	17439	ATTTAGATAG-----CCC------CTCTGGTCTGT----AAAATACTTA-CATCTCTTCTTACCATGCCAATAGCGTCTGAACCAAATGTATGTATTTCGATTAGG----------ATCGTATT------CTACGGTTACGACTACAATGATCATTATTTACTTTAGCGAGGACATAAGTGTGCGATACTGCTGTACTGAATAGTTTTATTATTCCTACAAT----ATACACTAGGGGATATAGGGGGTAACACTGTCCCTATAAATTCC--TTTTTTCCTTTTCTTTTTTGTTCAATTCTAAAC-AAAAAAATTATGGAAATGGAAGATGTTT--CCCTCCCCCACTTATCATTAAGTCCGAGCCGTAGAGAAAG-----AGTGAGATGCATTTTTCA…
Nephelochloa_orientalis		55 (Insert)	17385	17439	ATTTAGATAG-----CCC------CTCTCTCTGGTCTGTAAAATACTTA-CATCTCTTCTTACCATGCCAATAGCGTCTGAACCAAATGTATGTATTTCGATTAGG----------ATACTATT------CTACGGTTACGACTACAATGATCATTATTTACTTT-GCGAGGACGTAAGTGTGCGAGACTCCTGTACTGAATAGTTTTATTATTCCTACAAT----ATACACTAGGGGATATA-GGGGTAACACTGTCCCTAATAAATTC--CTTTTTCCCTTTCTTTTTTGTTCAATTCTAAACAAAAAAAATTATGGAAATGGAAGATGTTT--CCCTCCCCCACTTATCATTAAGTCCGAGCCGTAGAGAAAG-----AGTGAGATGCATTTTAAA…
Holcus_lanatus					ATTTAGATAGCCCC-TCT------CTCTGGTCTGT----AAAATACTTA-CATCTCTTCTTACCATGCCAATAGCGTCTAAACCAAATGTATGTATTTCAATTAGG----------ACCCTATT------CTACGGTTACGACTACAATGATCATTATTTACTTT-GGGAGGACGTAAGTGTGCGAGACTGCTATACTGAATAGTTTTATTATTCCTACAAT----ATATACTAGGGGATATAGGGGGTAACACTGTCCCTATAAATTCC--TTTTTTCCTTTTCTTTTTTGTTCAATTCTAAAC-AAAAAAATT------ATGGAAGATGTTT--CCCTCCCCCACTTATCATTAAGCCCGAGCGGTAGAGAAAG-----AGTGAGATGCATTTTTCA…
Poa_subgen_Stenopoa					1------------------------------------------------------------------------------------------------------------------------------------------------------------------------------------------------------AATAGTTTTATTATTCCTACAAT----ATACACTAGGGGGTATAGGGGGTAACACTGTCCCTATAAATTGC--TTTTTTCCTTTTCTTTTTTGTTCAATTCTAAAC----AAAATTATGGAAATGGAAGATGTTT--CCCTCCCCCACTTATCATTAAGTCCGAGTCGTAGAGAAAA-----AGTGAGATGCATTTTAAA…
Festuca_ovina		627 (Deletion)	17215	17841	ATTTAGATAG------CC------CTTTGGTATGT----AAAATACTTA-CATCTCTTCTTACCATGCCAATAGCGTCTGAACCAAATGTATGTATTTCGATTAGA----------ATCCTATT------CTACGGTTACAACTACAATGATCATTATTTACTTT-GCGAGGGCATAAGTGTGCGAGACTGCTGTACCGAATAGTTTTATTATTCCTACAAT----ATACACTAGGAG----AGGAAGTAACACTGTCCCTATAAATTCC--TTTTTTCCTTTTCTTTTTTGTTCAATTCTAAAC-AAAAAAATT------------------------------------------------------------------------------------…
Desmazeria_sicula		983 (Deletion)	16904	17886	TTAT-----------------------------------------------------------------------------------------------------------------------------------------------------------------------------------------------------------------------------------------------------------------------------------------------------------------------------------------------------------------------------------------------------------…
Catapodium_rigidum		983 (Deletion)	16904	17886	TTAT-----------------------------------------------------------------------------------------------------------------------------------------------------------------------------------------------------------------------------------------------------------------------------------------------------------------------------------------------------------------------------------------------------------…
Catapodium_marinum		983 (Deletion)	16904	17886	TTAT-----------------------------------------------------------------------------------------------------------------------------------------------------------------------------------------------------------------------------------------------------------------------------------------------------------------------------------------------------------------------------------------------------------…
Castellia_tuberculosa					ATTTAGATAG-----CCC------CTCTGGTATGTATGTAAAATACTTA-CATCTCTTCTTACCATGCCAATAGCGTCTGAACCAAATGTATATATTTCGATTAGG-----ATCCTATCCTATT------CTACGGTTACAACTACAATGATCATTATTTACTTT-GCGAGGGCATAAGTGTGCGAGACTGCTGTATTGAATAGTTTTATTATTCCTACAAT----ATACACTAGGGG----AGGAAGTAACACTGTCCCTATAAATT----------CCTTTTCTTTTTTGTTCCATTCTAAAC-AAAAAAATT------------------------------------------------------------------------------------…
Ammochloa_palestina					ATTTAGATAGCCCCTCCC-CTCTCCTCTAGTATGT----AAAATACTTAACATCTCTTCTTACCATGCCAATAGCCTCTGAACCAAATGTATGTATTTCGATTAGG----------ATCCTATT------CTACGGTTACGACTACAATGATCATTATTTACTTT-GCGAGGACGTAAGTGTGCGAGACTGCTTTACTGAATCGTTTTATTATTCCTACAAT----ATACACTAGGGGATATAGGGGGTAACACTGTCCCTATAAAGTCC--TTTTTTCCTTTTCTTTTTTGTTCAATTCTAAAC-AAAAAAATT------ATGGAAGATGTTT--CCCTCCCCCACTTATCATTAAGTTCGAGCTGTAGAGAAAGAAAAGAGTGAGATGCATTTTTCA…
Alopecurus_arundinaceus		55 (Insert)	17385	17439	ATTTAGATAG-----CCC------CTCTCTCTGGTCTGTAAAATACTTA-CATCTCTTCTTACCATGCCAATAGCGTCTGAACCAAATGTATGTATTTCGATTAGG----------ATCCTATT------CTACGGTTACGACTACAATGATCATTATTTACTTT-GCGAGGACGTAAGTGTGCGAGACTGCTGTACTGAATAGTTTTATTATTCCTACAAT----ATACACTAGGGGATATAGGGGGTAACACTGTCCCTTTAAATTCC--TTTTTTCCCTTTCTTTTTTGTTCAATTCTAAACAAAAAAAATTATGGAAATGGAAGATGTTT--CCCTCCCCCACTTATCATTAAGTCCGAGCCGTAGAGAAAG-----AGTGAGATGCATTTTAAA…
Poa_palustris					1------------------------------------------------------------------------------------------------------------------------------------------------------------------------------------------------------AATAGTTTTATTATTCCTACAAT----ATACACTAGGGGGTATAGGGGGTAACACTGTCCCTATAAATTGC--TTTTTTCCTTTTCTTTTTTGTTCAATTCTAAAC----AAAATTATGGAAATGGAAGATGTTT--CCCTCCCCCACTTATCATTAAGTCCGAGTCGTAGAGAAAA-----AGTGAGATGCATTTTAAA…
Festuca_ovina_NC_019649		627 (Deletion)	17215	17841	ATTTAGATAG-----CCC------CTTTGGTATGT----AAAATACTTA-CATCTCTTCTTACCATGCCAATAGCGTCTGAACCAAATATATGTATTTCGATTAGA----------ATCCTATT------CTACGGTTACAACTACAATGATCATTATTTACTTT-GCGAGGGCATAAGTGTGCGAGACTGCTGTACCGAATAGTTTTATTATTCCTACAAT----ATACACTAGGAG----AGGAAGTAACACTGTCCCTATAAATTCC--TTTTTTCCTTTTCTTTTTTGTTCAATTCTAAAC-AAAAAAATT------------------------------------------------------------------------------------…
Festuca_altissima					ATTTAGATAG-----CCC------CTCTAGTCTGT----AAAATACTTA-CATCTCTTCTTACCATGCCAATAGCGTCTGAACCAAATGTATGTATTTCGATTAGG----------ATCCTATT------CTACGGTTACGACTACAATGATCATTATTTACTTT-GCGAGGACGTAAGTGTGCGAGACTGCTGTACTGAATAGTTTTATTATTCCTACAGT----ATACACTAGGGGATATAGGAGGTAACACTGTCCCTATAAATTCC--TTTTTTCCTTTTCTTTTTTGTTCAATTCTAAAC-AAAAAAATT------ATGGAAGATGCCT------CCCCCACTTATCATTAAGTCCGAGCCGTAGAGAAAG-----------------------…
Festuca_arundinacea					ATTTAGATAGCCCCTCCC------CTCTGGTATAT----AAAATACTTA-CATCTTTTCTTACCATGCCAATAGCTTCTGAATCAAATGTATGTATTTCAATTAGG----------ATCCTATT------CTACGGTTACGACTACAATGATCATTATTTACTTT-GCGAGGACGTAAGTGCGCGAGACTGCTGTACTGAATAGTTTTATTATTCCTCCAATATACATACACCAGGGGATATAGGAGGTAACACTGTCCCTATAAATTCC--TTTTTTCCTTTCCTTTTTTGTTCAATTCTAAAC-AAAAAAATT------ATGGAAGATGTTT--CCCTCCCCCACTTATCATTAAGTCCGAGCCGTAGAGAAAG-----------------------…
Festuca_pratensis					ATTTAGATAGCCCCTCCC------CTCTGGTATAT----AAAATACTTA-CATCTTTTCTTACCATGCCAATAGCTTCTGAATCAAATGTATGTATTTCAATTAGG----------ATCCTATT------CTACGGTTACGACTACAATGATCATTATTTACTTT-GCGAGGACGTAAGTGCGCGAGACTGCTGTACTGAATAGTTTTATTATTCCTCCAATATACATACACCAGGGGATATAGGAGGTAACACTGTCCCTATAAATTCC--TTTTTTCCTTTCCTTTTTTGTTCAATTCTAAAC-AAAAAAATT------ATGGAAGATGTTTCCCCCCCCCCCGCTTATCATTAAGTCCGAGCCGTAGAGAAAG-----------------------…
Lolium_multiflorum					ATTTAGATAGCCCCTCCC------CTCTGGTATAT----AAAATACTTA-CATCTTTTCTTACCATGCCAATAGCTTCTGAATCAAATGTATGTATTTCAATTAGG----------ATCCTATT------CTACGGTTACGACTACAATGATCATTATTTACTTT-GCGAGGACGTAAGTGCGCGAGACTGCTGTACTGAATAGTTTTATTATTCCTCCAATATACATACACCAGGGGATATAGGAGGTAACACTGTCCCTATAAATTCC--TTTTTTCCTTTCCTTTTTTGTTCAATTCTAAAC-AAAAAAATT------ATGGAAGATGTTT--CCCCCCCCCGCTTATCATTAAGTCCGAGCCGTAGAGAAAG-----------------------…
Lolium_perenne					ATTTAGATAGCCCCTCCC------CTCTGGTATAT----AAAATACTTA-CATCTTTTCTTACCATGCCAATAGCTTCTGAATCAAATGTATGTATTTCAATTAGG----------ATCCTATT------CTACGGTTACGACTACAATGATCATTATTTACTTT-GCGAGGACGTAAGTGCGCGAGACTGCTGTACTGAATAGTTTTATTATTCCTCCAATATACATACACCAGGGGATATAGGAGGTAACACTGTCCCTATAAATTCC--TTTTTTCCTTTCCTTTTTTGTTCAATTCTAAAC-AAAAAAATT------ATGGAGGATGTTTCCCCCCCCCCCGCTTATCATTAAGTCCGAGCCGTAGAGAAAG-----------------------…
Deschampsia_antarctica					ATTTAGATAG-----ACC------CTCTGGTCTGT----AAAATACTTA-CATCTCTTCTTACCATGCCAATAGCGTCTGAACCAAATGTATGTATTTCGATTAGGATAGGATCCTATCCTATT------CGACGGTTACGACTACAATGATCATTATTT------AAGAGGACGTAAGTGTGCGAGACTGCTGTACTGAATAGTTTTATTATTACTACAAT----ATACACTAGGAGATATAGGGGGTAACACTGTCCCTATAAATTCC--TTTTTTCCTTTTCTTTTTTGTTCAATTCTAAAC-AAAAAAATT------ATGGAAGATGTTT--CCCTCCCCCACTTATCATTAAGTCCGAGCCGTAGAGAAAG-----AATGAGATGAATTTGAAA…
Puccinellia_nuttalliana					ATTTAGATAG-----CCT------CCCTGGTCTGT----AAAATACTTATTATCTCTTCTTACGATGCCAATAGCGTCTAAACCAAATGTATGTATTTTTATTAGG----------ATCCTATTCTACTTCTACGGTTACGACTACAATGATCATTATTTACTTT-GCGAGGA---------GCGAGACTGCTGTACTGAATAGTTTTTTTATTCCTACAAT----ATACACTAGGTGGTATAGGGAGTAACACTGTCCCTATAAATTCT--TTTTTTCCTTTTCTTTTTTGTTCAATTCTAAAC-AAAAAAATTATGGAAATGGAAGATGTTT--CCTTCCTTCACTTATCATTAAGTCCGAGCCGTAGAGAAAG-----AGTGAGATGCATTTTAAA…
Dactylis_glomerata		348 (Deletion)	17167	17514	ATTTAGATAGCCCCTCCCTCTCCCCTCTGGTCTAT----AAAATACTT-ACATCTCTTCTTACCATGCCAATAGCCTCTGAACCAAATCTATGTATTTCGATTAGG----------ATCCTATT------CTACGGTTACGACTACAATGATCATTATTTACTTT-GCGAGGACGTAAGTGTGCGAGACTGCTTTACTGAATCGTTTTATTATTGCTACAAT----ATACACTAGGGAATATAGGGGGTAACACTGTCCCTATAAAG------------------------------------------------------------------------------------------------------------------------------------…
Kengyilia_melanthera					ATTTAGATAGTCCCTCT---------------GGTCTGTAAAAT-----AAATCTCTTCTTACCATGCTAATAGCGCCTGAACCAAATGTATTTATTTTGATTAGGA----------------TCCTATTCTACGGTTACGACTGCAATAATCATTATTTACTTT-GCGAGGACGTAAGTGTGACAGACTGC----------TAAATTGTTTTATTATTCCTACAAT----ATAAACTAGGGGATATAGGGGGTAACACTGTCCCTATAAATTCC--TTTTTTCCTTTTCTTTTTTGTCCAGAATTGAACAAAAAAGA----AATTATGGAAGATGTTTTTTTCCC----------CATTAAGTCCGAGCCATAGAG-----TAAGAGTGAGATGAGTT…
Helictochloa_hookeri					ATTTAGATAGCCCCTCT---------------GGTCTGTAAAATACTT-ACATCTCTTCTTACCACGCCAATAGCGTCTGAACCAAATGTATGTATTTCGATTAGGA----------------TCCTATTCTACGGTTACGACTACAATGATCATTATTTACTTT-GCGAGGACGTAAGTGTGCGAGACTGCTGTACTGAATTGAATAGTTTTATTATTCCTACAATA----TACACTAGAGGATATAGGGGGTAATACTGTCCCTATAAATTCC--TTTTTTCCTTTTCTTTTTTGTTCAATTCTAAACAAAAAAATT-------ATGGAAGATGTTT--CACTCTCCCACTTATCATTAAGTCCGAGCCGTAGAG-----AAAGAGTGAGATGCATT…
Lamarckia_aurea	9				TCTATAGAAATAAAAGATAAAG--------AAAAAAGGGAGAAATGGGATTTCTAACCCATATCTC-----TCTTGTTCCTTTCTT-------------ACAAACAAAAGAGTTTTTCTTA-------------------TTGAAGGGTGGGTTATTA------------------TCCATTTTTAGTGATAAAAAATCACGACATACTGG-TTATGTCACTCTCACTAT-AACCA-CT-ATAATATGTAGGTATGTAGTATATGATTTGTCTATTTCTTAGAGTAG
Ventenata_macra					TCTATAGAAATAAAAGATAAAG--------AAAAAAGGGAGAAATTGGATTTCTAACCCATATCTC-----TCTCATTCCTTTCTTACAAACAAACAAAACAAACAAAAGAGTTTTTCTTA-------------------TTGAAGGGTGGATTATTA------------------TCCATTTTTAGTGATAAAAAATCACGACATACTAG-TTATGTCACTCTCACTAT-AACCACCT-ATAATATGTAGGTATGTAGTATATGATTCGTCTATTTCTTAGAGTAG
Scolochloa_festuaceae					TCTATAGAAATAAAAGATAAAG--------AAAAAAGGGAGAAATTGGATTTCTAACCCATATCTC-----TCTCATTCCTTTCTT-------------ACAAACAAAATAGTTTTTCTTA-------------------TTGAAGGGTGGATTATTT------------------TCCATTTTTAGTGATAAAAAATCACGACATACTAG-TTATGTCACTCTCACTAT-AACCACCT-ATAATATGTAGGTATGTAGTATATGATTCGTCTATTTCTTAGAGTAG
Nephelochloa_orientalis					TCTATAGAAATAAAAGATAA----------AAAAAAGGGATAAATTTGATTTCTAACCCATATCTC-----TCTCATTCCTTTCTTAC---------AAACAAACAAAAAAGTTTTTCTTA-------------------TTGAAGGGTGGATTATTA------------------TCCATTTTTAGTGATAAAAAATGACGACATACTAG-TTATGTCACTCTCACTAT-AACCACCT-ATAATATGTAGGTATGTAGTATATGATTCGTCTATTTCTTAGAGTAG
Holcus_lanatus					TCTATAGAAATAAAAGATAAAG--------AAAAAAGGGATAAATTTGATTTATAACCCATATCTC-----TCTCATTCCTTTCTT-------------ACAAACAAAAGAGTTTTTCTTA-------------------TTGAAGGGTGGATTATTA------------------TCCATTTTTAGTGATAAAAAATCACGACATACTAG-TTATGTTACTCTCACTAT-AACCACCT-AGAATATGTAGGTATGTAGTATATGATTTGTCTATTTCTTAGAGTAG
Poa_subgen_Stenopoa					TCTATAGAAATAAAAGATAAA---------GAAAAAGGGATAAATTTGATTTCTAACCCATATCTC-----TCTCATTCCTTTCTTACAACT------TACAAACAAAAGAGTTTTTCTTA-------------------TTGAAGGGTGGATTATTT------------------TCCATTTTTAGTGATAAAAAATCACGACATACTAG-TTATGTCACTCTCACTAT-AACCACCT-ATAATATGTAGGTATGTAGTATATGATTCGTATATTTATTAGAGTAG
Festuca_ovina					TCTATAGAAATAAAAGAGAAAT-AAAAAATAAAAAAGGGAGAGATTGGATTTCTAACCCATATATC-----TCTCATTCCTTTCTT-------------ACAAACAAAATAGTTTTTCTTA-------------------TTGAAGGGTGGATTATTATTGAAGGGTGGATTATTTTCCATTTTTAGTGATAAAAAATCACGACATACTAG-TTATGTCACTCTCACTATAACCCTAGT-ATAATATGTAGGTATGTAGTATATGATTCGTCTATTTTTTAGAGTAG
Desmazeria_sicula		281 (Deletion)	19246	19526	TCT-----------------------------------------------------------------------------------------------------------------------------------------------------------------------------------------------------------------------------------------------------------------------------------------TAG
Catapodium_rigidum					TCTATAGAAATAAAAGATAAAG--------AAAAAAGGGAGAAATTGGATTTCTAACCCATATCTC-----TCTCATTCCTTTCTT-------------ACAAACAAAAGAGTTTTTCTTA-------------------TTGAAGGGTGGATTATTA------------------TCCATTTTTAGTGATAAAAAATCACGACATACTAG-TTATGCCACTGTCACTAT-AACCACCT-ATAATATGTAGGTATGTAGTATATTATTCGTCTATTTCTTAGAGTAG
Catapodium_marinum					TCTATAGAAATAAAAGATAAAG--------AAAAAAGGGAGAAATTGGATTTCTAACCCATATCTC-----TCTCATTCCTTTCTT-------------ACAAACAAAAGAGTTTTTCTTA-------------------TTGAAGGGTGGATTATTA------------------TCCATTTTTAGTGATAAAAAATCACGACATACTAG-TTATGCCACTGTCACTAT-AACCACCT-ATAATATGTAGGTATGTAGTATATTATTCGTCTATTTCTTAGAGTAG
Castellia_tuberculosa					TCTATAGAAATAAAAGATAAAG--------AAAAAAGGGAGAAATTGGATTTCTAACCCATATCTC-----TCTCATTCCTTTCTT-------------ACAAACAAAATAGTTTTTCTTA-------------------TTGAAGGGTAGATTATTA------------------TCCATTTTTGGTGCTAAAAAATCACGACATACCAG-TTATGTCACTCTCACTATAAC-CAACT-AGAATATGTAGGTATGTAGTATATAATTCGTCTATTTCTTAGAGTAG
Ammochloa_palestina					TCTATAGAAATAAAAGATAAAG--------AAAAAAGGGAGAAATAGGATTTCTAACCCATATCTC-----TCTCGTTCCTTTCTT-------------ACAAACAAAAGAGTTATTCTTA-------------------TTGAAGGGTCGATTATTA------------------TCCATTTTTAGTGATAAAAAATCACGACATACTAG-TTATGTCACTCTCACTAT-AACCGCCT-ATAATATGTAGGTATGTAGTATATGATTCGTCTATTTCTTAGAGTAG
Alopecurus_arundinaceus					TCTATAGAAATAAAAGATAAAG--------AAAAAAGGGAGAAATTTGATTTCTAACCCATATCTC-----TCTCATTCCTTTCTT------------AACAAACAAAAGAGTTTTTCTTA-------------------TTGAAGGGTGGATTATTA------------------TCCATTTTTAGTGATAAAAAATCACGACATACTAG-TTATGTCACTCTCACTAT-AACCACCC-ATAATATGTAGGTATGTAGTATATGATTCGTCTATTTCTTAGAGTAG
Poa_palustris					TCTATAGAAATAAAAGATAAA---------GAAAAAGGGATAAATTTGATTTCTAACCCATATCTC-----TCTCATTCCTTTCTTACAACT------TACAAACAAAAGAGTTTTTCTTA-------------------TTGAAGGGTGGATTATTA------------------TCCATTTTTAGTGATAAAAAATCACGACATACTAG-TTATGTCACTCTCACTAT-AACCACCT-ATAATATGTAGGTATGTAGTATATGATTCGTATATTTATTAGAGTAG
Festuca_ovina_NC_019649					TCTATAGAAATAAAAGATAAATAAAAAAATAAAAAAGGGAGAAATTGGATTTCTAACCCATATATC-----TCTCATTCCTTTCTT-------------ACAAACAAAATAGTTTTTCTTA-------------------TTGAAGGGTGGATTATTA------------------TCCATTTTTAGTGATAAAAAATCACGACATA---------------------------CTAGT-ATAATATGTAGGTATGTAGTATATGATTCGTCTATTTTTTAGAGTAG
Festuca_altissima					TCTATAGAAATAAAAGATAAAG--------AAAAAAGGGAGAAATTGGATTTCTAACCCATATCTC-----TCTCATTCCTTTCTT-------------ACAAACAAAATAGTTTTTCTTA-------------------TTGAAGGGTGAATTATTA------------------TCCATTTTTAGTG----ATAATCACGACATACTAGATTATGTCACTCTCACTAT-AACCACCT-ATAATATGTAGGTATGTAGTATATGATTCGTCTATTTCTTAGAGTAG
Festuca_arundinacea					TCTATAGAAATAAAAGATAAAG--------AAAAAAGGGAGAAATTGGATTTCTAACCCATATCTC-----TCTCATTCCTTTCTT-------------ACAAACAAAATAGTTTTTCTTA-------------------TTGAAGGGTTAATTATTA------------------TCCATTTTTAGTGAGAAAAAATCACGACATACTAGATTATGTCACTCTCACTAT-AACCACCTGATAATATGTGGGTGTGTAGTATATGATTCGTCTATTTCTTAGAGTAG
Festuca_pratensis					TCTATAGAAATAAAAGATAAAG--------AAAAAAGGGAGAAATTGGATTTCTAACCCATATCTC-----TCTCATTCCTTTCTT-------------ACAAACAAAATAGTTTTTCTTATTGAAGGGTGAATTATTATTTGAAGGGTGAATTATTA------------------TCCATTTTTAGTGAGAAAAAATCACGACATACTAGATTATGTCACTCTCACTATCAACCACCTGATAATATGTGGGTGTGTAGTATATGATTCGTCTATTTCTTAGAGTAG
Lolium_multiflorum					TCTATAGAAATAAAAGATAAAG--------AAAAAAGGGAGAAATTGGATTTCTAACCCATATCTC-----TCTCATTCCTTTCTT-------------ACAAACAAAATAGTTTTTCTTA-------------------TTGAAGGGTGAATTATTA------------------TCCATTTTTAGTGAGAAAAAATCACGACATACTAGATTATGTCACTCTCACTAT-AACCACCTGATAATATGTGGGTGTGTAGTATATGATTCGTCTATTTCTTAGAGTAG
Lolium_perenne					TCTATAGAAATAAAAGATAAAG--------AAAAAAGGGAGAAATTGGATTTCTAACCCATATCTC-----TCTCATTCCTTTCTT-------------ACAAACAAAATAGTTTTTCTTA-------------------TTGAAGGGTGAATTATTA------------------TCCATTTTTAGTGAGAAAAAATCACGACATACTAGATTATGTCACTCTCACTAT-AACCACCTGATAATATGTGGGTGTGTAGTATATGATTCGTCTATTTCTTAGAGTAG
Deschampsia_antarctica					TCTAT------------TAAAG--------AAAAAAGGGAGAAATTGGATTTTTAACCCATATCTC-----TCTCATTCCTTTCTT-------------ACAAACAAAAGAGTTTTTCTTA-------------------TTGAAGGGTGGATTATTA------------------TCCATTTTTAGTGATAAAAAATCACGACATACTAG-TTATGTCACTCTCACTAT-AACCACCT-ATAATATGTAGGTA-------------------------TAGAGTAG
Puccinellia_nuttalliana					TCTATAGAAATAAAAGATAAAG--------AAAAAAGGGAGAAATTTGATTTCTAACCCATATCTCTTCTTTCTCATTCCTTTCTTACAAA--------ACAAACAAAAGAGTTTTTCTTA-------------------TTGAAGGGTGGATTATTA------------------TCCATTTTTAGTGAGAAAAAATCACGACATACTAG-TTATGTCACTCTCACTAT-AACCACCT-ATAATATTTAGGTATGTAGTATATGATTCGTCTATTTCTTAGAGTAG
Dactylis_glomerata					TCTATAGAAATAAAAGATAAAG--------AAAAAAGGGAGAAATGGGATTTCTAACCCATATCTC-----TCTTGTTCCTTTCTT-------------ACAAACAAAAGAGTTTTTCTTA-------------------TTGAAGGGTGGGTTATTA------------------GCCATTTTTAGTGATAAAAAATCACGACATACTAG-TTATGTCACTCTCACTAT-AACCA-CT-ATAATATGTAGGTATGTAGTATATGATTTGTCTATTTCTTAGAGTAG
Kengyilia_melanthera					TCTATAGAAATAAAAGATAAAGA-------AAAAAGGGGAAAATTTTTTTTTCTAATACATATCTC-----TCTCATTCCTTTCTT-------------ACAAACAAAAGAGTTTTTC-------------------------------------TTATTGAAGGGTGGATTATTATCCATTTTTAGTGATAAAAAATCACGACATACTAG-TTATGTCACTCTCACTATACCCACGTATAATATAATATGTGGGTATGTAGTATATGATTCGTCTATTTCTTAGAGTAC
Helictochloa_hookeri					TCTATAGAAATAAAAGATAAAG--------AAAAAAGGAAGAAATTGGATGTCTAACCCATATCTC-----TCTCATTCCTTTCTT-------------ACAAAAAAAAGAGTTTTTCTTAGTAAAGAGTGGATTACTA-------------------------------------TCCATTTTTAGTGATAAAAAATCACGACATACTAG-TTATGTCACTCTCACTAT----AACCACCT-ATAATATGTAGGTATGTAATATATGATTCGTCTAGTTGTTAGAATAG
Lamarckia_aurea	10				1--------------------------AAAAAAGGGCAGGGGGCAAGATCAAATACCCATAGGGCAGCCTT-ACTTCGCTTTTTTATTTTGCATCTCTCAGTAAAGAGGGCGGGGAGGCATATAGGCA--------TTTTTTTTTCACTACTCCCAATCGATAAAGAAAGACACACATATGATATAGAATAGCGGTATTTTTCCGGAATTCGTACATAAATT--GTATTCCCTTTTTATTTAAGACCT
Ventenata_macra					TTC----CTTTTTTTTTAT---GGAGAAAAAAGGGCAGGGGGCAAGATCAAATACCCATAGGGCACCCTTAACTTCGCTTTTTTATTTTGCATCTCTCATTAAAGAGGTAGGGGAGGCGTATAGGA-A-------TTTTTTTTTCACTACTCCCGATCGATAAAGAAAGACACACATATGCTATAGAATACCGATATTTTTCCGGAATCCATACATAAATT--GTATTCCCTTTTTATTTAAGACCT
Scolochloa_festuaceae					TTC----CTTTTTTTT-TA-TGGAAAAAAAAGGGGCAGGGGGCAAGATCAAATACCCATAGGGCACCCTTAC-TTCGCTTTTTTATTTTGCATCTCTGATTAAAGAGGGAGGGAAGGCGTATAGGAATTT-----TTTTTTTTTCACTACTCCCGATCGATAAAGAAAGACACACATATGATATAGAATACCGGTATTTTTCCGGAATCCATACATAAATT--GTATTCCCTTTTTATTTAAGACCT
Nephelochloa_orientalis					TT-----------------------------------------------------------------------------------------------------------------------------G-------TTTTTTTTTCACTACTCCCGATCGATAAAGAAAGACACAAATATGATATAGAATACCGGTATTTTTCCGGAATCCATACATAAATT--GTATTCCCTTTTTATTTAAGACCT
Holcus_lanatus					TTC----TTTTTTTT--TT-TCATGAAAAAAAGGGCAGGGGGCAAGATCAAATACCCATAGAGCACCCTTAA-CTT-CGCTTTTTTTTTGCATCTCTCATTAAAGAGGGAGGGGAGGCGTATAGGAA--T-----TTTTTTTTTCACTACTCCCGATCGATAAAAAAAGACACACATATGATATAGAATAACGGTATTTTTCCGGACTCCATACATAAATT--GTATTCCCTTTTTATTTAAGACCT
Poa_subgen_Stenopoa		227 (Deletion)	19720	19946	1-------------------------------------------------------------------------------------------------------------------------------------------------------------------------------------------------------------------------------TATTCCCTTTTTATTTAAGACCC
Festuca_ovina					TTC----CTTTTTT---TT-TACATGAAAAAAA---------------------------------------------------------------------------------------------------------------CACTACTCCTGATAGATAAAGAAAGACACACATATGATATAAAATACCGGTATTTTTCCGGAATCCATACATAAATT--GTATTCCCTTTTTATTTAAGACCT
Desmazeria_sicula					TTCTTTTCTTTTTTTTTCATG--AAAAAAAAAGAGCAGGGGGCAAGATAAAATACCTATAGGGCACCCTTAACTTCGCTTTTTTATTTTGCATCTCTCATTAAAGAGGGAGAGGGGGCATATAGGAA---------TTTTTTTTCACTACTCCCGATCGATAAAGAAAGACACACATATGATATAGAATACCGGTATCTTTCCGGAATCCATACATAAATT--GTATTCCCTTTTTATTTAAGACCT
Catapodium_rigidum					TTC------TTTTTTTCCATGAAAAAAAAAAAGAGCAGGGGGCAAGATAAAATACCCATAGGGCACCCTTAACTTCGCTTTTTTATTTTGCATCTCTCATTAAAGAGG----GGAGGCATATAGGAA---------TTTTTTTTCACTACTCCCAATCGATAAAGAAAGACACACATATGATATAGAATACCGGTATTTTTCCGGAATCCATACATAAATT--GTATTCCCTTTTTATTTAAGACCT
Catapodium_marinum					TTC------TTTTTTTCCATG--AAAAAAAAAGAGCAGGGGGCAAGATAAAATACCCATAGGGCACCCTTAACTTCGCTTTTTTATTTTGCATCTCTCATTAAAGAGG----GGAGGCATATAGGAA---------TTTTTTTTCACTACTCCCAATCGATAAAGAAAGACACACATATGATATAGAATACCGGTATTTTTCCGGAATCCATACATAAATT--GTATTCCCTTTTTATTTAAGACCT
Castellia_tuberculosa					TTC----CTTTTTT---TT-ACATGAAAAAAAAGGCAGGGGGCAAGATCAAATACCCATAGGGCACCCTTAC-TTCACTTTTTTATTTTGCATCTCTGATTAAAGAGGGAGGGGAGGCCTATAATAGAATAGGCATTTTTTTTTCACTACTCCTGATAGATAAAGAAAGACACACATATGATATAGAATACCGGTATTTTTCCGGAATCCATACATAAATT--GTATTCCCTTTTTATTTAAGACCT
Ammochloa_palestina					TTC----CTTTTTTTTCAT----GGAAAAAAAGGGCAGGGGGCAAGATCAAATGCCCATAGGGCACCCTTAACTTCGCTTTTTTATTTTGCATCTCTCATTAAAGAGGGAGGGGAGGCATATAGGAA---------TTTTTTTTCACTACTCCCGATCGATAAAGAAAGACACACATATGATATAGAATACCGGTATTTTTCCGGAATCCATACATAATTCTAGTATTCCCTTTTTATTTAAGACCT
Alopecurus_arundinaceus					TTC----CTTTTTTTTTTCATGGAGAAAAAAGGGGCAGGGGGCAAGATCAAATACCCATAGGGCACCCTTAACTTCGCTTTTTTATTTTGCATCCCTCATTAAAGAGGGAGGGGAGGCGTATAGGAAT-------TTTTTTTTTCACTACTCCCGATCGATAAAGAAAGACACACATATGATATAGAATACCCATATTTTTCCGGAATCCATACATAAATT--GTATTCCCTTTTTATTTAAGACCT
Poa_palustris					TTG----CTTTTTTCTCCA--TGAAAAAAAAGGGGGAGGGGGCAAGATCAAATACCCATAGGGCACCCTTAA-TTCGCTTTTATATTTTTCATCTCTCATTAAAGAGGGAAGGGAAGCGTATAGG--A-------ATTTTTTTTCACTACTCCCGATCGATAAAGAAAGAGACACATATGATATAGAATACTGGTATTTTTCCGGAATCCATACATAAATT--GTATTCCCTTTTTATTTAAGACCT
Festuca_ovina_NC_019649		226 (Deletion)	19725	19951	TT-----------------------------------------------------------------------------------------------------------------------------------------------------------------------------------------------------------------------------------CCTTTTTATTTAAGACCT
Festuca_altissima					TT-----CTTTTTTTT-CA-TGGAAAAAAAAGGCGCAGGGGGCAAGATCAAATACCCATAGGGCACCCTTAC-TTCGCTTTTTTATTTTGCATCTCTGATTAAAGAGGGAGGGGAGGCGTATAATAGGAA-----TTTTTTTTTCACTACTCC------AGAAAGAAAGACACACATATGATATAGAATACCGGTATTTTTCCGGAATCCATACATAAATT--GTATTCCCTTTTTATTTAAGACCT
Festuca_arundinacea		226 (Deletion)	19725	19951	TT-----------------------------------------------------------------------------------------------------------------------------------------------------------------------------------------------------------------------------------CCTTTTTATTTAAGACCT
Festuca_pratensis		226 (Deletion)	19725	19951	TT-----------------------------------------------------------------------------------------------------------------------------------------------------------------------------------------------------------------------------------CCTTTTTATTTAAGACCT
Lolium_multiflorum		226 (Deletion)	19725	19951	TT-----------------------------------------------------------------------------------------------------------------------------------------------------------------------------------------------------------------------------------CCTTTTTATTTAAGACCT
Lolium_perenne		226 (Deletion)	19725	19951	TT-----------------------------------------------------------------------------------------------------------------------------------------------------------------------------------------------------------------------------------CCTTTTTATTTAAGACCT
Deschampsia_antarctica					TTC----CTTTTTTTCATG-GAAAAAAAAAAAGGGCAGGGGGCAAGATCAAATACCCATAGGGCACCCTTAC-TTTACTTTTTTATTTTGCATCTCTCATTAAAGAGGGAGGGGAGGCGTATAGGAA--------TTTTTTTTTCACTACTCCCGATCGATAAAGAAAGACACACATATGATATAGAATACCAGTATTTTTCCGGAATCCATACATAAATT--GTATTTCCTTTTTATTTAAGACCT
Puccinellia_nuttalliana		242 (Deletion)	19725	19966	TT--------------------------------------------------------------------------------------------------------------------------------------------------------------------------------------------------------------------------------------------------CCT
Dactylis_glomerata					1------------------------AAAAAAAGGGCAGGGGGCAAGATCAAATATCCATAGGGCAGCCTT-ACTTCGCTTTTTTATTTTGCATCTCTCAGTAAAGAGGGCGGGGAGGCGTATAGGAAT-------TTTTTTTTTCACTACTCCCAATCGATAAAGAAAGACACACATATGATATAGAATAGCGGTATTTTTCCGGAATCCGTACATAAATT--GTATTCCCTTTTTATTTAAGACCT
Kengyilia_melanthera					TTCCTTTTTCCAT----------GAAAAAAAGGGGCAGGGAGCAAGATCAAATACTCATAGGGCACCCTT-ACTTCAC-TTTTTATTTTGCATCTCTCATTAAAGAGGGAGGGAAGGCGTATAGGAA----------TTTTTTTCACTACTCCCGATCGATAAAGATAAAGAAAGACACACATATGATATGTGGATTAGTAGAATTTAGGATATTACTCTATCTTTCTTTATGATGATACCATCCTCATCTTAATTTCCTATTCCACTCTTATGGAATAGAGTACCGGTATTTTACCGGAATCCATACATAAATC--GTATTCCCTTTTTATTTCAGACCT
Helictochloa_hookeri					TTCCTTTTTTTGTTCCAT------GAAAAAAAGGGGCAGGGGCAAGATCAAATACCCATAGGGCACCCTT-ACTTCGCTTTTTTATTTTGCATCTCTCATTAAAGAGGGAGGGGAGGCGTATAGGAAT-------TTTTTTTTTCACTACTCCCGATC------GATAAAGAAAGACACACATATGAT----------------------------------------------------------------------------------------ATAGAATACCGGTATTTTTCCGGAGTCCATACATAAA--TAGTATTCCCTTTTTATTTAAGACCT
Lamarckia_aurea	11				AAATAGGAATATTTTTTATTCCT----TTTGTTACTCT-------------TTTTTA-----------TTTTTATAAGCA-AAGGACGGACAAATATACGATAA----AATG-------ATGGCCAGATAAATATTTATTGG-----ATACCTA-CCTTACCTATGTTTATTTTTGACCTAAACCCTACAGCCCTGCTTTCTATTATTCTATGAAAGAATGAAGAGACTTTATCCACAACACAAATCCTAAATTAATTTAGGGTCGGCCTATTTAATCT
Ventenata_macra					GAATAGGAATATCTTTTATTCCT----TTTGTTACTCTT------------TT---------------TTT-TATAAGCA-AAGGACGCCCGAATATACCATAA----AATT-------ATGGACAGATAAATATTTATTGG-----ATAACTA-CCTTACCTATGTTTATTTTTGACCTAAACCCTACAGCACTGCTTTCTATCATTCTATGAAAGAATGAAGAGACTTTATCCACAACACAACTCATAAATTAATTTGGGATCGGCCTATTTAATCT
Scolochloa_festuaceae					AAATAGGAATATTTTTTATTCCT----TTTGTTACTCTT------------TTTTTTTT---------TTTTTATAAGCA-AAGGACGCCCGAATATACCATAA----AATT-------ATGGACAGATAAATATTTATTGG-----ATACCTA-CCTTACCTATGTTTATTTTTGACCTAAACCCTACAGCCCTGCTTTCTATCATTCTATGAAAGAATGAAGAGACTTTATCCACAACACAAATCAAAAATTAATTTTTGATCGGCCTATTTAATCT
Nephelochloa_orientalis					GAATAGGAATATCTTTTATTCCT----TTTGTTACTCTT------------TT---------------TTT-TATAAGCA-AAGGATGCCCGAATATACCATAA----AATT-------ATGGACAGATAAATATTTATTGG-----ATAACTA-CCTTACCTATGTTTATTTTTGACCTAAACCCTACAGCACTGCTTTCTATCATTCTATGAAAGAATGAAGAGACTTTATCCACAACACAACTCATAAATTAATTTGGGATTGGCCTATTTAATCT
Holcus_lanatus					AAATAGGAATACTTTTTATTCCT----TTTGTTACTCTT------------TTTTTTTTATTTTTCTCTTTTTAGAAGCA-AAGGACGCCCGAATATACCATAA----AATT-------ATGTACAGATAAATATTTATTGG-----CTACCTA-CCTTACCTATGTTTATTTTTGACCTAAACCCTACAGCCCTGCTTTCTATCATTCTATGAAAGAATGAAGAGACTTTATCCACAACACAAATCATAAATTAATTTTTGATCGACCTATTTAATCT
Poa_subgen_Stenopoa					GAATACGAATATCTTTTATTCCT----TTTGTTACTCTT------------TT---------------TTTTTATAAGCA-AAGGACGCCCGAATATACCATAA----AATT-------ATGGACAGATAAATATTTATTGG-----ATACCTACCCTTACCTATGTTTATTTTTTACCTAAACCCTACAGCACTGCTTTCTATCATTCTATGAAAGAATGAAGAGACTTTATCCACAACACAACTCATAAATTAATTTTGGATCGGCCTATTTAATCT
Festuca_ovina					AAATAGGAATATTTTTTATTCCT----TTTGTTACTCTT------------TTTTTTC----------TTTTTATAAGCA-AAGGATGCCCGAATATACCATAAAAAAAATT-------ATGGACAGATAAATATTTATTGGATACCATACCTA-CCTTACCCATGTTTATTTTTGACCTAAACCCTACAGCCCTGCTTTCTATCATTCTATGAAAGAATGAAGAGACTTTATCCACAACACAAATCATAAATTAATTTATGATCGGCCTGTTTAATCT
Desmazeria_sicula		273 (Deletion)	21245	21517	AAT---------------------------------------------------------------------------------------------------------------------------------------------------------------------------------------------------------------------------------------------------------------------------------TCT
Catapodium_rigidum					AATATAGTAATATTTTTATTCCT----TTTGTTACTCTT------------TTTTTTA----------TTTTTGTAAGCA-AAGGACCCCCGAATATACCATAA----AATT-------ATGGACAGATAAATATTTATTGG-----ATACCTACCTTAAACTATGTTTATTTTTTACCTAAACCCTACAGCCCCGCTTTCTATCATTCTATGAAAGAATGAAGAGACTTTATCCACAACACAAAAAATTAATT-----------GGCCTATTTAATCT
Catapodium_marinum					AATATAGTAATATTTTTATTCCT----TTTGTTACTCTT------------TTTTTTA----------TTTTTGTAAGCA-AAGGACCCCCAAATATACCATAA----AATT-------ATGGACAGATAAATATTTATTGG-----ATACCTACCTTAAACTATGTTTATTTTTTACCTAAACCCTACAGCCCCGCTTTCTATCATTCTATGAAAGAATGAAGAGACTTTATCCACAACACAAAAAATTAATT-----------GGCCTATTTAATCT
Castellia_tuberculosa					AAATAGGAATATTTTTTATTCCT----TTTGTTACT-TT------------TTTTTTA----------TTTTTATAAGCA-AAGGACGCCCGAATATACCATAA----AATT-------ATGGACAAATAAATATTTATTGGATACCATACCTA-CCTTACCCATGTTTATTTTTGACCTAAACCCTACAGCCCTGCTTTCTATCATTCTAT-------------------------AACACAAATCATAAATTAATTTATGATCGGCCTGTTTAATCT
Ammochloa_palestina					AAATAGGAATATTTATTATTCCT----TTTGTTACTCTT------------TTTTTT-----------TTTTTATAAGCATAAGGACGGCCTAATATACCATAA----AATAAAAAATTATGGGCAGATAAATATTTATTGG-----ATACCTA-CCTTACCCATGTTTATTTTTGACCTAAACCCTACAGCCCTGCTTTTTATCATTCTATGAAAGAATGCGGAGACTTTATCCACAGCACAAATCCAAAATGAATTTAGGATCGGCCTATTTAATCT
Alopecurus_arundinaceus					GAATAGGAATATCTTTTATTCCT----TTTGTTACTCTT------------TT---------------TTT-TATAAGCA-AAGGACGCCCGAATATACCATAA----AATT-------ATGGACAGATAAATATTTATTGG-----ATACCTA-CCTTACCCATGTTTCTTTTTGACCTAAATCCTACAGCACTGCTTTCTATCATTCTATGAAAGAATGAAGAGACTTTATCCACAACACAACTCATAAATTTATTTTGGATCGGCCTATTTAATCT
Poa_palustris					GAATAGGAATATCTTTTATTCCT----TTTGTTACTCTT------------TT---------------TTTTTATAAGCA-AAGGACGCCCGAATATACCATAA----AATT-------ATGGACAGATAAATATTTATTGG-----ATACCTACCCTTACCTATGTTTATTTTTTACCTAAACCCTACAGCACTGCTTTCTATCATTCTATGAAAGAATGAAGAGACTTTATCCACAACACAACTCATAAATTAATTTTGGATCGGCCTATTTAATCT
Festuca_ovina_NC_019649					AAATAGGAATATTTTTTATTCCT----TTTGTTACTCTT------------TTTTTTC----------TTTTTATAAGCA-AAGGATGCCCGAATATACCATAAAAAAAATT-------ATGGACAGATAAATATTTATTGGATACCATACCTA-CCTTACCCATGTTTATTTTTGACCTAAACCCTACAGCCCTGCTTTCTATCATTCTATGAAAGAATGAAGAGACTTTATCCACAACACAAATCATAAATTAATTTATGATCGGCCTGTTTAATCT
Festuca_altissima					AAATAGGAATATTTTTTATTCCT----TTTGTTACTC--------------TTTTTTTC---------TTTTTATAAGCA-AAGGACGCCCGAATATACCATAA----AATT-------ATGGACAGATAAATATTTATTGGATACCATACCTA-CCTTACCCATGTTTATTTTTGACCTAAACCCTACAGCCCTGCTTTCTATCATTCTATGAAAGAATGAAGAGACTTTATCCACAACACAAATCATAAATTAATTTATGATCAGCCTATTTAATCT
Festuca_arundinacea					AAATAGGAATATTTTTGATTCCTTTTGTTTGTTACTC--------------TTTTTTTA---------TTTTTATAAGCA-AAGGACGCCCAAATATACCATAA----AATT-------ATGGACAGATAAATATTTATTGGATACTATACCTA-CCTTACCCATGTTTATTTTTGACCTAAACCCTACAGCCCTGCTTTCTATCATTCTATGAAAGAATGAAGAGACTTTATCCACAACACAAATCATAAATTAATTTATGATCGGCCTATTTAATCT
Festuca_pratensis					AAATAGGAATATTTTGGATTCCTTTTGTTTGTTACTC--------------TTTTTTTA---------TTTTTATAAGCA-AAGGACGCCCAAATATACCATAA----AATT-------ATGGATAGATAAATATTTATTGGATACTATACCTA-CCTTACCCATGTTTATTTTTGACCTAAAGCCTACAGCCCTGCTTTCTATCATTCTATGAAAGAATGAAGAGACTTTATCCACAACACAAATCATAAATTAATTTATGATCGGCCTATTTAATCT
Lolium_multiflorum					AAATAGGAATATTTTTGATTCCTTTTGTTTGTTACTC--------------TTTTTTTA---------TTTTTATAAGCA-AAGGACGCCCAAATATACCATAA----AATT-------ATGGATAGATAAATATTTATTGGATACTATACCTA-CCTTACCCATGTTTATTTTTGACCTAAAGCCTACAGCCCTGCTTTCTATCATTCTATGAAAGAATGAAGAGACTTTATCCACAACACAAATCATAAATTAATTTATGATCGGCCTATTTAATCT
Lolium_perenne					AAATAGGAATATTTTTGATTCCTTTTGTTTGTTACTC--------------TTTTTTTA---------TTTTTATAAGCA-AAGGACGCCCAAATATACCATAA----AATT-------ATGGATAGATAAATATTTATTGGATACTATACCTA-CCTTACCCATGTTTATTTTTGACCTAAAGCCTACAGCCCTGCTTTCTATCATTCTATGAAAGAATGAAGAGACTTTATCCACAACACAAATCATAAATTAATTTATGATCGGCCTATTTAATCT
Deschampsia_antarctica		59 (Deletion)	21423	21481	AAATAGGAATATTTTTTATTCCT----TTTGTTACTC-----------------TTTTT---------TTTTTATAAGCA-AAGGACGCCCGAATATACCATAA----AATT-------ATGGACAGATAAATATTTATTGG-----ATACCTA-CCTTACCTATGTTTATTTTTGACCTA-----------------------------------------------------------ACAAATCATAAATTAATTTTTAATCGGCCTATTTAATCC
Puccinellia_nuttalliana					GAATAGGAATATTTTTTATTCCT----TTTGTTACTTTT------------TT---------------TTTTTATAAGCA-AAGGACGCCCGAATATACCAAAA----AATT-------ATGGACAGATAAATATTTATTGG-----ATACCTA-CCTTACCTATGTTTATTTTTGACCTAAACCCTACAGCCCTGCTTTCTATCATTCTATGAAAGAATGAAGAGACTTTATCCACAACACAACTCATAAATTAATTTTGGATTGGCCTATTTAATCC
Dactylis_glomerata					AAATAGGAATATTTTTTATTCCT----TTTGTTACTCTTTTTTATTTTTAATTTTTA-----------TTTTTATAAGCA-AAGGACGGACAAATATACGATAA----AATG-------ATGGGCAGATAAATATTTATTGG-----ATACCTA-CCTTACCTATGTTTATTTTTGACCTAAACCCTACAGCCCTGCTTTCTATTATTCTATGAAAGAATGAAGAGACTTTATCCACAACACAAATCCAAAATTAATTTAGGGTCGGCCTATTTAATCT
Kengyilia_melanthera					GAATAGGAAGATTTTTTATTCCT----TTTGTTACTCTTTT---------------------------TTTTTGTAAGCA-AAGGACGCCCGAATATACCAT-----------AAAATTATCGATAGATAAATATTTATTGGATA------CCTACCTTACCTATGTTTATTTTTGACCTAAACCCTGCAGCC------TTGCTTTGTATCATTCTATGAAAGAATGAAGAGACTTTATCCATAACACAACTCCTAAATTGATTTTTGATCGACCTATTTAATCT
Helictochloa_hookeri					AAATAGGAATATTTTTTATTCC-----------------------------TTTTTTTACTCTTTTTATTTTTATAAGCA-AAGGACGCCCAAATATATCAT-----------AAAATTATGGACAGATAAATATTTATTGGATA------CCTACCTTACCTATGTTTATTTTTGACCTAAACCCTACAGTCCTGCTTTTGCTTTCTATCATTCTATGAAAGAATGAAGAGACGTTATCCACAACCCAAATCAAAAATTAATTTTTGATCGGTCTATTTAATCT
Lamarckia_aurea	12	139 (Deletion)	22155	22293	CAC-------------------------------------------------------------------------------------------------------------------------------------------TAT
Ventenata_macra		SSM example	22723	22744	CAC-GTTTTCTTACGAAAACCCCTTTTAT-TTTGAATATAATATAATTC-------------------------TACTTA--C-TTTTTTCCAGTCTTTTAAAA--AAAT-TTATTACTGCTTTTTTTGATCCTGTTTCTATTAT
Scolochloa_festuaceae					CAC-GTTTTCTTACGAAAACCCCTTTTA------TTTTGAATATAATTC-------------------------TACTTA--C-TTTTTTCCAATCTTAAAAAAAAAAAG--GATTCCTGCTTTTTTTGATCCAGTTTCTATTAT
Nephelochloa_orientalis		SSM example			CAC-GTTTTCTTACGAAAACCCCTTTTAT-TTTGAATATAATATAATTC-------------------------TACTTA--C-TTTTTTTCATTC-----AAA--AAAT-TTATTCCTTCTTTTTTTGATCCTGTTTCTATTAT
Holcus_lanatus					CAC-GGTTTCTTACGAAAACCCCTTTTA------TTTTGAATATAATTC-------------------------TACTTA--C-TTTTTTCCAATCTTAAAAAAAAAAAAAGGATTCCCGCTTTTTTTGATCCAGTTTCTATTAT
Poa_subgen_Stenopoa					CAC-GTTTTCTTACGAAAACCCCTTCTAT-TTTTAATAGAATATAATTC-------------------------TACTTA--C-TTTTTTCCAATCTTTAAAAAATAAAT-TTATTCCTTCTTTTTTTGATCCTCTTTCTATTAT
Festuca_ovina					CAC-GTTTTCTTACGAAAACCCCTTTTA------TTTTGAATATAATTC-------------------------TACTTA--C-TTTTTCCCAATCTTTAAAAAAA----------CCTGCTTTTTTTGATCCAGTTTCTATTAT
Desmazeria_sicula					CAC-GTTTTCTTATGAAAACCCCTTTTA------TTTTGAATATAATTC-------------------------TACTTA--CTTTTTTTCCAATCTTAATAAAAAAAGG---ATTCCTGCTTTTTTTGATCCAGTTTCTATTAT
Catapodium_rigidum					CAC-GTTTTCTTATGAAAACCCCTTTTA------TTTTGAATATAATTC-------------------------TACTTAACTTTTTTTTCCAATCT---TAAAAAAAGG---ATTCCTGCTTTTTTTGATCCAGTTTCTATTAT
Catapodium_marinum					CAC-GTTTTCTTATGAAAACCCCTTTTA------TTTTGAATATAATTC-------------------------TACTTAACTTTTTTTTCCAATCT---TAAAAAAAGG---ATTCCTGCTTTTTTTGATCCAGTTTCTATTAT
Castellia_tuberculosa					CAC-GTTTTCTTATGAAAACCCCTTTTA------TTTTGAATATAATTC-------------------------TACTTA--C-TTTTTTCCAACCTTTAAAAAAA----------CCTGCTTTTTTTGATTCCGTTTCTATTAT
Ammochloa_palestina					CACAGTTTTCTTAGGAAAACTCCTTTTA------TTTTGAATCTAATTC-------------------------TACTTA--ACTTTTTTTCCAATCTTTTTTAAAAAAG--GATTCCTGCTTTTTTTGATCCAGTTTCTATTAT
Alopecurus_arundinaceus		SSM example			CAT-GTTTTCTTACGAAAACCCCTTTTAT-TTTGAATATAATATAATTC-------------------------TACTTA--C-TTTTTTCCAGTCTTTAAAAA--AAAT-TTATTCCTGCTTTTTTTGATCCTGTTTCTATTAT
Poa_palustris					CAC-GTTTTCTTACGAAAACCCCTTCTAT-TTTTAATATAATATAATTCTACTTACTTTTTTATAATATAATTCTACTTA--C-TTTTTTCCAATCTTTAAAAAAGAAAT-TTATTCCTTCTTTTTTTGATCCTCTTTCTATTAT
Festuca_ovina_NC_019649					CAC-GTTTTCTTACGAAAACCCCTTTTA------TTTTGAATATAATTC-------------------------TACTTA--C-TTTTTCCCAATCTTTAAAAAAA----------CCTGCTTTTTTTGATCCAGTTTCTATTAT
Festuca_altissima					CAC-GTTTTCTTACGAAAACCCCTTTTA------TTTTGAATATAATTC-------------------------TACTTA--C-TTTTTTCCAATCT----AAAAAAAAA--GATTCCTGCTTTTTTTGATCCAGTTTCTATTAT
Festuca_arundinacea					CAC-GTTTTCTTACGAAAAACCCTTTTA------TTTTGAATATAATTC-------------------------TACTTA--C-TTTTTTCCAATCT----AAAAAAAAA--GATTCCTGCTTTTTTTGATCCAGTTTCTATTAC
Festuca_pratensis					CAC-GTTTTCTTACGAAAAACCCTTTTA------TTTTGAATATAATTC-------------------------TACTTA--C-TTTTTTCCAATCT-AAAAAAAAAAAA--GATTCCTGCTTTTTTTGCTCCAGTTTCTATTAC
Lolium_multiflorum					CAC-GTTTTCTTACGAAAAACCCTTTTA------TTTTGAATATAATTC-------------------------TACTTA--C-TTTTTTCCAATCTAAAAAAAAAAAAA--GATTCCTGCTTTTTTTGCTCCAGTTTCTATTAC
Lolium_perenne					CAC-GTTTTCTTACGAAAAACCCTTTTA------TTTTGAATATAATTC-------------------------TACTTA--CTTTTTTTCCAATCTAAAAAAAAAAAAA--GATTCCTGCTTTTTTTGCTCCAGTTTCTATTAC
Deschampsia_antarctica					CAC-GTTTTCTTACGAAAACCCCTTTTAT-TTTGTTTTGAATAGAATTC-------------------------TACTTA--C-TTTTTTCCAATCTTAAAACA-----------------------------------------
Puccinellia_nuttalliana					CAC-GTTTTCTTACGAAAACCCCTTTTATTTTTATTTTGAATATGATTC-------------------------TACTTA--C-TTTTTTCCATTTTAAAAAAT-------TTATTCCTGCTTTTTTTGATCCAGTTTCGATTAT
Dactylis_glomerata		139 (Deletion)	22155	22293	CAC-------------------------------------------------------------------------------------------------------------------------------------------TAT
Kengyilia_melanthera					CAC-GTTTTCTTACGAAAAGCCCCTTT-CTTTTATTTTGAATATAATTCTACTTACTTTTTTCCAATCTTTTTC------------------------------AAAAAATCTATTCCTGCTTTTTTTGATCCAGTTTCGATTAT
Helictochloa_hookeri					CAC-GTTTTCTTACGAAAACCCCTTTTA------TTTTGAATAAAATTCTACTTACCTTTTT--------------TCCAATCTTTTT---------------AAAATTTAGGATTCCCGCTTTTTTTGATCCAGTTTCTATTAT
Lamarckia_aurea	13				1----------------------------------------TATTCTCTTCGATAGATTCTATCTTAAA
Ventenata_macra					AAA--AAAT-TTATTACTGCTTTTTTTGATCCTGTTTCTATTATTCTTTTCGATAGATTCTATCGTAAA
Scolochloa_festuaceae					AAAAAAAAG--GATTCCTGCTTTTTTTGATCCAGTTTCTATTATTCTCTTCGATAGATTCTATCTTAAA
Nephelochloa_orientalis					AAA--AAAT-TTATTCCTTCTTTTTTTGATCCTGTTTCTATTATTCTTTTCGATAGATTCTATCGTAAA
Holcus_lanatus					AAAAAAAAAAGGATTCCCGCTTTTTTTGATCCAGTTTCTATTATTCTCCTCGATAGATTCTATCTTAAA
Poa_subgen_Stenopoa					AAAATAAAT-TTATTCCTTCTTTTTTTGATCCTCTTTCTATTATTCTTTTCGATAGATTCTATCTTAAA
Festuca_ovina					AAAAA----------CCTGCTTTTTTTGATCCAGTTTCTATTATTATCTTCGATAGATTCTATCTTAAA
Desmazeria_sicula					AAAAAAAGG---ATTCCTGCTTTTTTTGATCCAGTTTCTATTATTTTCTTCGATAGATTCTATCTTAAA
Catapodium_rigidum					AAAAAAAGG---ATTCCTGCTTTTTTTGATCCAGTTTCTATTATTTTCTTCGATAGATTCTATCTTAAA
Catapodium_marinum					AAAAAAAGG---ATTCCTGCTTTTTTTGATCCAGTTTCTATTATTTTCTTCGATAGATTCTATCTTAAA
Castellia_tuberculosa					AAAAA----------CCTGCTTTTTTTGATTCCGTTTCTATTATTCTCTTCGATAGATTCTATCTTAAA
Ammochloa_palestina					TTAAAAAAG--GATTCCTGCTTTTTTTGATCCAGTTTCTATTATTCTCTTCGATAGATTCTATCTTAAA
Alopecurus_arundinaceus					AAA--AAAT-TTATTCCTGCTTTTTTTGATCCTGTTTCTATTATTCTTTTCGATAGATTCTATCTTAAA
Poa_palustris					AAAAGAAAT-TTATTCCTTCTTTTTTTGATCCTCTTTCTATTATTCTTTTCGATAGATTCTATCTTAAA
Festuca_ovina_NC_019649					AAAAA----------CCTGCTTTTTTTGATCCAGTTTCTATTATTATCTTCGATAGATTCTATCTTAAA
Festuca_altissima					AAAAAAAAA--GATTCCTGCTTTTTTTGATCCAGTTTCTATTATTCTCTTCGATAGATTCTATCTTAAA
Festuca_arundinacea					AAAAAAAAA--GATTCCTGCTTTTTTTGATCCAGTTTCTATTACTCTCTTCAATAGATTCTATCTTAAA
Festuca_pratensis					AAAAAAAAA--GATTCCTGCTTTTTTTGCTCCAGTTTCTATTACTCTCTTCAATAGATTCTATCTTAAA
Lolium_multiflorum					AAAAAAAAA--GATTCCTGCTTTTTTTGCTCCAGTTTCTATTACTCTCTTCAATAGATTCTATCTTAAA
Lolium_perenne					AAAAAAAAA--GATTCCTGCTTTTTTTGCTCCAGTTTCTATTACTCTCTTCAATAGATTCTATCTTAAA
Deschampsia_antarctica		63 (Deletion)	22256	22318	ACA---------------------------------------------------------------AAA
Puccinellia_nuttalliana					AAT-------TTATTCCTGCTTTTTTTGATCCAGTTTCGATTATTCTTTTCGATAGATTCTATCTTAAA
Dactylis_glomerata					1----------------------------------------TATTCTCTTCGATAGATTCTATCTTAAA
Kengyilia_melanthera					---AAAAAATCTATTCCTGCTTTTTTTGATCCAGTTTCGATTATTCTCCTCGATAGATTCTATCTTAAA
Helictochloa_hookeri					--AAAATTTAGGATTCCCGCTTTTTTTGATCCAGTTTCTATTATTCTCTGCGATAGATTCTATCTTAAA
Lamarckia_aurea	14	59 (Deletion)	22956	23014	GGA-----------------------------------------------------------AAT
Ventenata_macra					GGAAATCCAAAATTTTCTAGCAATTCTACTACTCCAAAAT----------------AAAAAGAAC
Scolochloa_festuaceae					GGAAATCCTAAATTTTCTAGCAATTCTACTACTCCAAAAT---------------AAAAAAGAAC
Nephelochloa_orientalis					GGAAATCAAAAATTTTTTAGCAATTCTACTACTCCAAAAT---------------AAAAAAGAAC
Holcus_lanatus					GGAAATCCTAAAGTTTCTAGCAATTCTACTACTACAAAAT---------------AAAAAAGAAC
Poa_subgen_Stenopoa					GGAAATCCAAAATTTTCTAGCAATTCTACTACTCCAAAAT---------------AAAAAAGAAC
Festuca_ovina					GGAAATCGTAAATTTTCTAGCAATTCTACTACTCCAAAAT---------------AAAAAAGAAC
Desmazeria_sicula					GGAAAACCTAAATTTTCTAGCAATTCTACTACTCCAAAAT-AAAAAATCCAAAATAAAAAAGAAT
Catapodium_rigidum					GGAAATCCTAAATTTTCTAGCAATTCTACTACTCCAAAATAAAAAAATCCAAAATAAAAAAGAAT
Catapodium_marinum					GGAAATCCTAAATTTTCTAGCAATTCTACTACTCCAAAATAAAAAAATCCAAAATAAAAAAGAAT
Castellia_tuberculosa					GGAAATCGTAAATTTTCTAGCAATTCTACTACTCCAAAAT---------------CAAAAAGAAC
Ammochloa_palestina					GGAAATCCTAAATTTTCTAGCAATTCTACTATTCAAAAAT---------------AAAAAAGAAC
Alopecurus_arundinaceus					GGAAATCCAAAATTTTCTAGCAATTCTACTATTCCAAAAT---------------AAAAAAGAAC
Poa_palustris					GGAAATCCAAAATTTTCTAGCAATTCTACTACTCCAAAAT---------------AAAAAAGAAC
Festuca_ovina_NC_019649					GGAAATCGTAAATTTTCTAGCAATTCTACTACTCCAAAAT---------------AAAAAAGAAC
Festuca_altissima					GGAAATCCTAAATTTTCTAGCAATTCTACTACTCCAAAAT---------------AAAAAAGAAC
Festuca_arundinacea					GGAAATCCTAAATTTTATAGCAATTCTACTACTCCAAAAT---------------AAAAAAGAAC
Festuca_pratensis					GGAAATCCTAAATTTTATAGCAATTCTACTACTCCAAAAT---------------AAAAAAGAAC
Lolium_multiflorum					GGAAATCCTAAATTTTATAGCAATTCTACTACTCCAAAAT---------------AAAAAAGAAC
Lolium_perenne					GGAAATCCTAAATTTTATAGCAATTCTACTACTCCAAAAT---------------AAAAAAGAAC
Deschampsia_antarctica					GGAAATCCTAAATTTTCTAGCAATTCTACTACTCCAAAAT---------------AAAAAAGAAC
Puccinellia_nuttalliana					GGAAATCCTAAATTTTCTAACAATTCTACTACTCCAAAAT---------------AAAAAAGAAT
Dactylis_glomerata					GGAAATCCTCAATTTTCTAGCAATTCTACTACTCCAAAAT---------------AAAAAAGAAT
Kengyilia_melanthera					-GAAATACTTAATTTTCTAGCAATTATACTACTCC----------GATCCGAAATAAAAAAGAAA
Helictochloa_hookeri					GGAAATCCTAAATTTTCTAGCAATTCTACTAC---------------TCCAAAATAAAAAAGAAC
Lamarckia_aurea	15				1--AAGTAAGCGCGCTATTATAAACCGAAGTAAAGTCAAACTTTCTCAAACTTTCTAGTGTATT------TATTAT------ATTAAATT----ATGG--------CTTTATTACATTAATAGAAAGGA
Ventenata_macra					TTAAAGTAAGCGCGCTATTCTAAATCCAAGTAAAGTCAAACTT----------TCTAGTGTATT------TATTAT------ATTAAATT----ATGG--------CTTTATTACATTAATAGAAAGGA
Scolochloa_festuaceae					TTAAAGTAAGCGCGCTATTCTAAATTGAAGTAAAGTCAAACTTTCTCAAACTTTCTAGTGTATT------TATTAT------ATTAAATT----ATGG--------CTTTATTACATTAATAGAAAGGA
Nephelochloa_orientalis					TTCAAGTAAGCGCGCTATTCTAAATCGAAGTAAAGTCAAACTTTCTCAAACTTTCTAGTGTATT------TATTAT------ATTAAATT----ATGG--------CTTTATTACATTAATAGAAAGGA
Holcus_lanatus					TTAAAGTAAGCGCGCTATTCTAAATCGAAGTAAAGTCAAACTTTCTCAAACTTTCTAGTGTTTT------TATTAT------ATTAAATT----ATGG--------CTTTATTACATTAATAGAAAGGA
Poa_subgen_Stenopoa					TTAAAGTAAGCGCGCTATTATAAATCGAAGTAAAGTCAAACTTTCTCAAACTTTCTAGTGTATT------TATTAT------ATTAAATT----ATGG--------CTTTATTACATTAAGAGAAAGGA
Festuca_ovina					TTAAAGTAAGCGCACTATTCTAAATCGAAGTAAAGTAAAACTTTCTCAAACTTTCTAGTGTATTTATTATTATTAT------AGTAAATAAATTATGG--------CTTTATTACATTAATAGAAAGGA
Desmazeria_sicula					TTAAAGTAAGCGCGCTATTCTAAATCGAAGTAAAATCAAACTTTCTCAAACTTTCTAGTGTATT------TATTAT------ATTAAATT----ATGG--------CTTTATTACATTAATAGAAAGGA
Catapodium_rigidum					TTAAAGTAAGCGCCCTATTCTAAATCGAAGTAAAATCAAACTTTCTCAAACTTTCTAGTGTATT------TATTAT------ATTAAATT----ATGGCTTTATTACTTTATTACATTAATAGAAAGGA
Catapodium_marinum					TTAAAGTAAGCGCCCTATTCTAAATCGAAGTAAAATCAAACTTTCTCAAACTTTCTAGTGTATT------TATTAT------ATTAAATT----ATGGCTTTATTACTTTATTACATTAATAGAAAGGA
Castellia_tuberculosa					TTAAAGTAAGTGCGCTATTCTAAATCGAAGTAAAGTCAAACTTTCTCAAACTTTCTAGTGTATTTATTATTATTAT------ATTAAATG----ATGG--------CTTTATTACATTAATAGAAAGGA
Ammochloa_palestina					TTAAAGTAAGGGCGCTATGCTAAATCGAAGTAAAGTCAAACTTTCCCAAACTTTCTAGTGTATT------TATTATAATAAAATTAAATT----ATGG--------CTTTATTACATTAATAGAAAGGA
Alopecurus_arundinaceus					TTAAAGTAAGCGCGCTATTCTAAATCGAAGTAAAGTCAAACTTTCTCAAACTTTCTAGTGTATT------TATTAT------ATTAAATT----ATGG--------CTTTATTACATTAATAGAAAGGA
Poa_palustris					TTAAAGTAAGCGCGCTATTATAAATCGAAGTAAAGTCAAACTTTCTCAAACTTTCTAGTGTATT------TATTAT------ATTAAATT----ATGG--------CTTTATTACATTAATAGAAAGGA
Festuca_ovina_NC_019649					TTAAAGTAAGCGCACTATTGTAAATCGAAGTAAAGTAAAACTTTCTCAAACTTTCTAGTGTATTTATTATTATTAT------AGTAAATAAATTATGG--------CTTTATTACATTAATAGAAAGGA
Festuca_altissima					TTAAAGTAAGCGCGCTATTCTAAATCGAAGTAAAGTCAAACTTTCTCAAACTTTCTAGTGTATA------AATTAT------ATTAAATT----ATGG--------CTTTATTACATTAATAGAAAGGA
Festuca_arundinacea					TTAAAGTAAGCGCGCTATTCTAAATCGAAGTAAAGCCAAACTTTCTCAAACTTTCTAGTCTATTTATTA-TATTAT------ATTAAATT----ATGG--------CTTTATTACATTAATAGAAAGGA
Festuca_pratensis					TTAAAGTAAGCGCGCTATTCTAAATCGAAGTAAAGCCAAACTTTCTCAAACTTTCTAGTCTATT------TATTAT------ATTAAATT----ATGG--------CTTTATTACATTAATAGAAAGGA
Lolium_multiflorum					TTAAAGTAAGCGCGCTATTCTAAATCGAAGTAAAGCCAAACTTTCTCAAACTTTCTAGTCTATT------TATTAT------ATTAAATT----ATGG--------CTTTATTACATTAATAGAAAGGA
Lolium_perenne					TTAAAGTAAGCGCGCTATTCTAAATCGAAGTAAAGCCAAACTTTCTCAAACTTTCTAGTCTATT------TATTAT------ATTAAATT----ATGG--------CTTTATTACATTAATAGAAAGGA
Deschampsia_antarctica		124 (Deletion)	23041	23164	TT----------------------------------------------------------------------------------------------------------------------------GGA
Puccinellia_nuttalliana					TTAAAGTAAGCGCGCTATTCTAAATCGAAGTAAAATCAAACTT----------TCTAGTGTATT---------------------------------------------TATTATATTAATAGAAAGGA
Dactylis_glomerata					1--AAGTAAGCGCGCTATTCTAAACCGAAGTAAAGTCAAACTTTCTCAAACTTTCTAGTGTATT------TATTAT------ATTAAATT----ATGG--------CTTTATTACATTAATAGAAAGGG
Kengyilia_melanthera					TTAAAGTAAGCACGCTATTCTAAATCGAAGTAAAG----------TCAAACGTTCTAGTGTATT---------------------------------ATATTACGGCTTTATTACATTCATAGAAAGGA
Helictochloa_hookeri					TTAAAGTAAGCGCGCTATTCTAAATCGAAGTAAAGTCAAACTTTCTCAAACTTTCTAGTGTATTTATTAT------------ATTAAA------------TTATGGCTTTATTACATTAATAGAAAGGG
Lamarckia_aurea	16				TATCTTTAATGTCTATAAAGTGGAGTCATCTTTTGTGCGGGTTTCCACTTTAAGCAATGATTTTAGAATCCG----ATTCAATAGAAAATG-------AGAAAATATTAAAACAAAA------TAGAAGAAACAAATGTATATAGGG---TATTATATATTCCT
Ventenata_macra					TATCCTTAATGTCTAT-AAGTGGAGTCATCTTTTGTGCGGGTTTCCACTTTAAGCAATGATTTTAGAATCCG----ATTCAATAGAAAATG-------AGAAAATATGCAAACAAAA------TAGAAGAAACAAATGTATATAGGG---TATTATATATTCCT
Scolochloa_festuaceae					TATCCTTAATGTCTAT-AAGTGGAGTCATCTTTTGTGCGGGTTTCCGCTTTAAGCAATGATTTTAGAATCCG----ATTCAATAGAAAATG-------AGAAAATATGCAAACAAAA------TAGAAGAAACAAATGTATATAGGG---TATTATATATTCCT
Nephelochloa_orientalis					TATCCTTAATGTCTAT-AAGTGGAGTCATCTTTTGTGCGGGTTTTCGCTTTAAGCAATGATTTTAGAATCCG----ATTCAATAGAAAATG-------AGAAAATATGCAAACAAAA------TAGAAGAAACAAATGTATATAGGG---TATTATATATTCCT
Holcus_lanatus					TATCCTTAATGTCTAT-AAGTGGAGTCATCTTTTGTGCGGGTTTCCGCTTTAAACAATGATTTTAGAATCCG----ATTCAATAGAAAATGAGAA---AATATGCATGCAAACAAAA------TAGAAGAAACAAATGTATATAGGG---TATTATATATTCCT
Poa_subgen_Stenopoa					TATCCTTAATGTCTAT-AAGTGGAGTCATCTTTTGTGCGGGTTTCCGCTTTAAGCAATGATTTTCGAATCCG----ATTCAATAGAAAATG-------AGAAAATATGCAAACAAAA------TAGAAGAAACAAATGTATATAGGG---TATTATATATTCCT
Festuca_ovina					TATCCATAATGTCTAT-AAGTGGAGTCATCTTTTGCGCGGGTTTCCGCTTTAAGCAATGATTTTAGAATCCGATTCATTCAATAGAAAATG-------AGAAAATATGCAAAAAAAA------TAGAAGAAACAAATGTATATAGGGTATTATTATATATTCCT
Desmazeria_sicula					TATCCTTAATGTCTAT-AAGTGGAGTCATCTTTTGTGCGGGTTTCCGC-----------------------------------AGAAAATG-------AGAAAATATGCAAACAAAA------TAGAAGAAACAAATGTATATAGGG---TATTATATATTCCT
Catapodium_rigidum					TATCCTTAATGTCTAT-AAGTGGAGTCATCTTTTGTGCGGGTTTTCGC-----------------------------------AGAAAATG-------AGAAAATATGCAAACAAAA------TAGAAGAAACAAATGTATATAAGG---TATTATATATTCCT
Catapodium_marinum					TATCCTTAATGTCTAT-AAGTGGAGTCATCTTTTGTGCGGGTTTTCGC-----------------------------------AGAAAATG-------AGAAAATATGCAAACAAAA------TAGAAGAAACAAATGTATATAAGG---TATTATATATTCCT
Castellia_tuberculosa					TATCCTTAATGTCTAT-AAGTGAAGTCATCTTTTGCGCGGGTTTCCGTTTTAAGCAATGATTTTAGAATCCGATTCATTCAATAGAAAATG-------AGAAAATATGCAAACAAAA------TAGAAGAAACAAATGTATATAGGG---TATTATATATTCCT
Ammochloa_palestina					TATCCTTAATGTCTAT-AAGTGGAGTCATCTTTTGTGTGGGTTTCAACTTTAAGCAATGATTTTAGAATCCG----ATTCAATAGAAAATG-------ATAAAATATTAAAACAAAA------TAGAAGAAACAAATGTATACAGGG---TATTATATATTCCT
Alopecurus_arundinaceus					TATCCTTAATGTCTAT-AAGTGGAGTCATCTTTTGTGCGAGTTTCCGCTTTAAGCAATGATTTTAGAATCCG----ATTCAATAGAAAATT-------AGAAAATATGCAAACAAAA------TAGAAGAAACAAATCGATATAGGG---TATTATATATTCCT
Poa_palustris					TATCCTTAATGTCTAT-AAGTGGAGTCATCTTTTGTGCGGGTTTCCGCTTTAAGCAATGATTTTCGAATCCG----ATTCAATAGAAAATG-------AGAAAATATGCAAACAAAA------TAGAAGAAACAAATGTATATAGGG---TATTATATATTCCT
Festuca_ovina_NC_019649					TATCCATAATGTCTAT-AAGTGGAGTCATCTTTTGCGCGGGTTTCCGCTTTAAGCAATGATTTTAGAATCCGATTCATTCAATAGAAAATG-------AGAAAATATGCAAAAAAAA------TAGAAGAAACAAATGTATATAGGGTATTATTATATATTCCT
Festuca_altissima					GATCCTTAATGTCTAT-AAGTGGAGTCATCTTTTGTGCGGGTTTCCGCTTTAAGCAATGATTTTAGAATCCGATTCATTCAATAGAAAATG-------AGAAAATATGCAAACAAAA------TAGAAGAAACAAATGTATATAGGG---TATTATATATACCT
Festuca_arundinacea					TATCCTTAATGTCTAT-AAGTGGAGTCATCTTTTGTGCGGGTTTCCGCTTTAAGGAATGATTTTAGAATCCGATTCATTCAATAGAAAATG-------AAAAAATATGAAAACAAAA------TAGAAGAAACAAATGTATATAGGG---TATTATATATACCT
Festuca_pratensis					TATCCTTAATGTCTAT-AAGTGGAGTCATCTTTTGTGCGGGTTTCCGCTTTAAGGAATGATTTTAGAATCCGATTCATTCAATAGAAAATG-------AAAAAATATGAAAACAAAA------TAGAAGAAACAAATGTATATAGGG---TATTATATATACCT
Lolium_multiflorum					TATCCTTAATGTCTAT-AAGTGGAGTCATCTTTTGTGCGGGTTTCCGCTTTAAGGAATGATTTTAGAATCCGATTCATTCAATAGAAATAGAAAATGAAAAAAATATGAAAACAAAA------TAGAAGAAACAAATGTATATAGGG---TATTATATATACCT
Lolium_perenne					TATCCTTAATGTCTAT-AAGTGGAGTCATCTTTTGTGCGGGTTTCCACTTTAAGGAATGATTTTAGAATCCGATTCATTCAATAGAAATAGAAAATGAAAAAAATATGAAAACAAAA------TAGAAGAAACAAATGTATATAGGG---TATTATATATACCT
Deschampsia_antarctica		158 (Deletion)	35830	35987	TAT--------------------------------------------------------------------------------------------------------------------------------------------------------------CCT
Puccinellia_nuttalliana					TATCCTTAATGTCTAT-AAGTGGAGTCATCTTTTGTGCGGGTTTCCGCTTTAAGCAATGATTTTAGAATCCG----ATTCAATAAAAAATG-------AGAAAATATGCAAACAAAATAGAAGTAGAAGAAACAAATGTATGTAAGG--------TATTTTCCT
Dactylis_glomerata					TATCTTTAATGTCTAT-AAGTGGAGTCATCTTTTGTGCGGGTTTCCACTTTAAGCAATGATTTTAGAATCCG----ATTCAATAGAAAATG-------AGAAAATATTAAAACAAAA------TAGAAGAAACAAATGTATATAGGG---TATTATATATTCCT
Kengyilia_melanthera					TATCCTTAATGTCTAT-AAGTGGAGTCCTCTTTTATGCGGGTTTCCACTTTAAGCAATGATTTTAGAATCCG----ATTCAATAGAAAATG-------AGAAAATATGCAAACAAAA------TAGAAGAAACAAATGTATATAGGA---TATTATATATTCCT
Helictochloa_hookeri					TATCCTTAATGTCTAT-AAGTGGAGTCATCTTTAGTGCGGGTTTCCGCTTTAAGCAATGATTTTAGAATTAG----ATTCAGTAGAAAATG-------AGAAAATATGCAAACAAAA------TAGAAGAAACAAATGTATATAGGG---TATTATATA-CCCT
Lamarckia_aurea	17	81 (Deletion)	36072	36152	CAA---------------------------------------------------------------------------------TAA
Ventenata_macra					AAATTTGTACTTTTTTAGTTACTTCTCCACAATAGAGATAGAGCTTAGAAGTATACTTCTTTCCAAT----AGAGCTTATGAAGTAA
Scolochloa_festuaceae					CAATTTGTACTTTTTTAGTTACTTCTCCACAATAGAGATAGAGCTTAGAAGTATACTTCTCCCCAAT----AGAGCTTATGAAGTAA
Nephelochloa_orientalis					CAATTTGTACTTTTTTAGTTACTTCTCCACAATAAAGATAGAGCTTAGAAGTATACTTCTTTCCAAT----AGAGCTTATGAAGTAA
Holcus_lanatus					CAATTTGTACTTTTTTAGTTACTTCTCCACAATAGAGATAGAGCTTAGAAGTATACTTCTCCCCAAT----AGAGCTTATGAAGTAA
Poa_subgen_Stenopoa					CCATTTTTACTTTTTTAGTGACTTCTCCACAATAGAGATAGAGCTTAGAAGTATACTTCTTCCCAAT----CGAGCTTATGAAATAA
Festuca_ovina					CAATTTGTACTTTTTTAGTTACTTCTCCACAATAGAGATAGAGTTTAGAAGTATACTTCTCCCCAAT----AGAGCTTATGAAGTAA
Desmazeria_sicula					CAATTTGTACTTTTTTAGTTACTTCTCCACAATATAGATAGAGCTTAGAAGTATACTTCTCCCCAAT----GGGGCTTATGAAGTAA
Catapodium_rigidum					CAATTTGTACTTTTTTAGTTACTTCTCCACAATATAGATAGAGCTTAGAAGTATACTTCTCCCCAAT----GGAGCTTATGAAGTAA
Catapodium_marinum					CAATTTGTACTTTTTTAGTTACTTCTCCACAATATAGATAGAGCTTAGAAGTATACTTCTCCCCAAT----GGAGCTTATGAAGTAA
Castellia_tuberculosa					CAATTTGTACTTTTTTAGTTACTTCTCCACAATAGAGATAGAGCTTAGAAGTATACTTCTCCCCAAT----GGAGCTTATGAAGTAA
Ammochloa_palestina					CAATTTGTACTTTTTTGGTTACTTCTCCACAATGGAGATAGAGCTTAGAAGTATACTTCTCCCCAATAGAGAGAGCTTATGAAGTAA
Alopecurus_arundinaceus					CAATTTATACTTTTTTAGTTACTTCTCCACAATAGAGATAGAGCTTAGAAGTATACTTCTTACCGAT----AGAGCTTATGAAGTAA
Poa_palustris					CCATTTTTACTTTTTTAGTGACTTCTCCACAATAGAGATAGAGCTTAGAAGTATACTTCTTCCCAAT----CGAGCTTATGAAATAA
Festuca_ovina_NC_019649					CAATTTGTACTTTTTTAGTTACTTCTCCACAATAGAGATAGAGTTTAGAAGTATACTTCTCCCCAAT----AGAGCTTATGAAGTAA
Festuca_altissima					CAATTTGTACTTTTTGAGTTACTTCTCCACAATAGAGATAGAGCTTAGAAGTATACTTCTCCCCAAT----AGAGCTTATGAAGTAA
Festuca_arundinacea					CAATTTGTACTTTTTGAGTTACTTCTCCACACTAGAGATAGAGCTTAGAAGTATACTTCTCCCTAAT----AGAGCTTATGAAGTAA
Festuca_pratensis					CAATTTGTACTTTTTGAGTTACTTCTCCACACTAGAGATAGAGCTTAGAAGTATACTTCTCCCTAAT----AGAGCTTATGAAGTAA
Lolium_multiflorum					CAATTTGTACTTTTTGAGTTATTTCTCCACACTAGAGATAGAGCTTAGAAGTATACTTCTCCCTAAT----AGAGCTTATGAAGTAA
Lolium_perenne					CAATTTGTACTTTTTGAGTTACTTCTCCACACTAGAGATAGAGCTTAGAAGTATACTTCTCCCTAAT----AGAGCTTATGAAGTAA
Deschampsia_antarctica					CAATTTGTACTTTTTTAGT----------------------------------TACTTTTCCCCAAT----AGAGCTTATGAAATAA
Puccinellia_nuttalliana					TCATTTGTACTTTTTTAGTTACTTCTCCACAATAGAGATAGAGCTTAGAAGTATACTTCTCCTCAAT----AGAGCTTATGAAGTAA
Dactylis_glomerata		81 (Deletion)	36072	36152	CAA---------------------------------------------------------------------------------TAA
Kengyilia_melanthera					CAATTTG----ATTTCAATTTGTACTTTTTAGT---------------TACTTTACTTCTCCCCAATAGAG-----CTTAGAAGTAA
Helictochloa_hookeri					CAATTTGTATTTTTTTAGTTACTTCTCCACAATAGAGATAGAGCTTAGAAGTATACTTCTCCCCAAT----AGAGCTTATGAAGTAA
Lamarckia_aurea	18	229 (Deletion)	36508	36736	TAC-------------------------------------------------------------------------------------------------------------------------------------------------------------------------------------------------------------------------------------TTTTTTCCTTT
Ventenata_macra		237 (Deletion)	36507	36743	TA---------------------------------------------------------------------------------------------------------------------------------------------------------------------------------------------------------------------------------------------CTTT
Scolochloa_festuaceae					TACTTTTTT-CTTTTTTTAGTAAAATGGGTATTTGCTTCTGCAATTCCAATTATATCAATACTTTG------ATTTTATTTACTCCTATTTATTACTCCTGGAATTATCTATTTATCGGGACAGGCAATACCCCGCCCCAGGAAGGGCTGAGTTGAGTATGATTAATTTAG-----AAGATATGCTCGCCTT----CTTCCTTCCCGTCCTTAGTTTAGGAAAGTCGAAAGTTTTTTTCCTTT
Nephelochloa_orientalis		237 (Deletion)	36507	36743	TA---------------------------------------------------------------------------------------------------------------------------------------------------------------------------------------------------------------------------------------------CTTT
Holcus_lanatus					TAC--------TTTTTTTAGTAAAATGGGTATTTGCTTCTGCAATTCCAATTATATCAATACTTT-------ATTTTATTTACTCCTATTTATTACTCCTGGAATTATCTATTTATCGGGACAGGAAATACCCCGCCCCAGGGAGGGCCGAGTTGAGTATGATTAATTTAG-----AAGATATGCTCGCCTT----CTTCCTTCCCGTCCTTAGTTTAGGAAAGTAGAAAGTTTTTTTCCTTT
Poa_subgen_Stenopoa		229 (Deletion)	36508	36736	TAC-------------------------------------------------------------------------------------------------------------------------------------------------------------------------------------------------------------------------------------TTTTTTCCTTT
Festuca_ovina		222 (Deletion)	36523	36744	TA-----------TTTTT------------------------------------------------------------------------------------------------------------------------------------------------------------------------------------------------------------------------------TAT
Desmazeria_sicula					TACTTTTTTCTTTTTTTTAGTAAAATGGGTATTTGCTTCTGCAATTCCAATTATATCAATACTTT-------ATTTTATTTACTCCTATTTATTACTCCTGGAATTATCTATTTATCGGGACCGGCAATACCTCGCCCCAGGAAGGGCTGAGTTGAGTATGATTAATTTAT-----AAGATATGCTCGCCTT----CTTTCTTTCCGTCCTTTGTTTAGGAAAGTAGAAAGTTTTTTTCCTTT
Catapodium_rigidum					TACTT-----TTTTTTTTAGTAAAATGGGTATTTGCTTCTGCAATTCTAATTATATCAATACTTT-------ATTTTATTTACTCCTATTTATTACTCCTGGAATTATCTATTTATCGGGACAGGCAATACCTCGCCCCAGGAAGGGCTGAGTTGAGTATGATTAATTTAT-----AAGATATGCTCGCCTTCTTCCTTTCTTTCCGTCCTTTGTTTAGGAAAGTAGAAAGTTTTTTTGCTTT
Catapodium_marinum					TACTT-----TTTTTTTTAGTAAAATGGGTATTTGCTTCTGCAATTCTAATTATATCAATACTTT-------ATTTTATTTACTCCTATTTATTACTCCTGGAATTATCTATTTATCGGGACAGGCAATACCTCGCCCCAGGAAGGGCTGAGTTGAGTATGATTAATTTAT-----AAGATATGCTCGCCTTCTTCCTTTCTTTCCGTCCTTTGTTTAGGAAAGTAGAAAGTTTTTTTGCTTT
Castellia_tuberculosa					TACTTTTTT-CCTTTTTT------------------------------------------------------------------------------------------------------------------------------------------------------------------------------------------------------------------------------TTT
Ammochloa_palestina		229 (Deletion)	36508	36736	TAC-------------------------------------------------------------------------------------------------------------------------------------------------------------------------------------------------------------------------------------TTTTTTCCTTT
Alopecurus_arundinaceus		237 (Deletion)	36507	36743	TA---------------------------------------------------------------------------------------------------------------------------------------------------------------------------------------------------------------------------------------------CTTT
Poa_palustris		229 (Deletion)	36508	36736	TAC-------------------------------------------------------------------------------------------------------------------------------------------------------------------------------------------------------------------------------------TTTTTTCCTTT
Festuca_ovina_NC_019649		222 (Deletion)	36523	36744	TA-----------TTTTT------------------------------------------------------------------------------------------------------------------------------------------------------------------------------------------------------------------------------TAT
Festuca_altissima					TACTTTTTT-CTTTTTTTAGTAAAATGGGTATTTGCTTCTGCAATTCCAATTATATCAATACTTT-------ATTTTATTTACTCCTATTTATTACTCCTGGAATTATCTATTTATCGGGACAGGCAATACCCCGCCCCAGGAAGGGCTGAGTTGAGTATGATTAATTTAG-----AAGATATGCTCGCCTT----CTTCCTTCCCGTCCTTAGTTTAGGAAAGTAGAAAGTTTTTTTCCTTT
Festuca_arundinacea					TACTTTTTT-ATTTTTTTAGTAAAATGGGTATTTGCTTCTGCAATTCCAATTATATCAATACTTT-------ATTTTATTTACTCCTATTTATTACTTCTGGAATTCTCTATTTATTGGGACAGGCAATACCCCGCCCCAGGAAGGGCTCAGTTGAGTATGATTAATTTAG-----AAGATATGCTCGCCTT----CTTCCTTCCCGTCCTTAGTTTAGGAAAGTAGAAAGTTTTTTTCCTTT
Festuca_pratensis					TACTTTTTT-CTTTTTTTAGTAAAATGGGTATTTGCTTCTGCAATTCCAATTATATCAATACTTT-------ATTTTATTTACTCCTATTTATTACTTCTGGAATTCTCTATTTATTGGGACAGGCAATACCCCGCCCCAGGAGGGGCTCAGTTGAGTATGATTAATTTAG-----AAGATATGCTCGCCTT----CTTCCTTCCCGTCCTTAGTTTAGGAAAGTAGAAAGTTTTTTTCCTTT
Lolium_multiflorum					TACTTTTTT-CTTTTTTTAGTAAAATGGGTATTTGCTTCTGCAATTCCAATTATATCAATACTTT-------ATTTTATTTACTCCTATTTATTACTTCTGGAATTCTCTATTTATTGGGACAGGCAATACCCCGCCCCAGGAGGGGCTCAGTTGAGTATGATTAATTTAG-----AAGATATGCTCGCCTT----CTTCCTTCCCGTCCTTAGTTTAGGAAAGTAGAAAGTTTTTTTCCTTT
Lolium_perenne					TACTTTTTT-CTTTTTTTAGTAAAATGGGTATTTGCTTCTGCAATTCCAATTATATCAATACTTT-------ATTTTATTTACTCCTATTTATTACTTCTGGAATTCTCTATTTATTGGGACAGGCAATACCCCGCCCCAGGAGGGGCTCAGTTGAGTATGATTAATTTAG-----AAGATATGCTCGCCTT----CTTCCTTCCCGTCCTTAGTTTAGGAAAGTAGAAAGTTTTTTTCCTTT
Deschampsia_antarctica					TACTTTTTT-CTTTTTTTAGTAAAATGGGTATTTGCTTCTGCAATTCCAATTATATCAATACTTTATACTTTATTTTATTTACTCCTATTTATTACTCCTGAAATTATCTATTTATCGGGACAGGCAATACCCCGCCCCAGGAAGGGCTGAGTTGAGTATGATTAATTTAGAAGATAAGATATGCTCGCCTT----CTTCCTTTCCGTCCTTAGTTTAGGAAAGTAGAAAGTTTTTTTCCTTT
Puccinellia_nuttalliana					TACTTTTTT-CTTTTTTTAGTAAAATGGGTATTTGCTTCTGCAATTCCAATTATATCAATACTTTATACTTTATTTTATTTACTCCTATTTATTACTCCTGGAATTATCTATTTATCGGGACAGGCAATACCCCACCCCAGGAAGGGCTGAGTTGAGTATGATTAATTTAG-----AAGATATGCTTACCTT----CTTCCTTCCCGTCCTTTGTTTAGGAAAGTAGAAAGTTGTTTTCCTTT
Dactylis_glomerata		229 (Deletion)	36508	36736	TAC-------------------------------------------------------------------------------------------------------------------------------------------------------------------------------------------------------------------------------------TTTTTTCCTTT
Kengyilia_melanthera					TACTTTTTT-CTTTTTTTAGT-AAATTGGTATTTGCTTCCGCAATTCCAATTATATCA-------ATACTTTATTTAATTTACTCCTATTTATTACTCCTGGAATTATCTATTTATCGGGACAGATAATACCCCATTCTAGGAAGGGCTGAGTTGAGTATGATTAATTTAG-----AAGATCTGCTCACCTT----CTTATTTCCCGTCCTTAGTT------TAGGAAAGTGGAAAG-TTTTTTCCTTT
Helictochloa_hookeri					TACTTTTTTCTTTGTTTTAGTAAAATGGGTATTTCCTTCTGCAATTCCAATTATATCA-------ATACTTTATTTTATTTACTCCTATTTATT-----------------------GGGACAGGCAATACCCCGCCCCAGGAAGGGCTGAGTTGAGTATGATT---------TAGAAGATATGCTTGGATTCTTCCTTCCT----GTCCTGAGTTTAGGAATAGGAAAGTCGAAAGTTTT--------
Lamarckia_aurea	19				CTAAGACTAGATTTCATTCCACTTTCCT-ATTTCTCAACAACAACAACTTCTCT-----CATC
Ventenata_macra					CTAAGACTAGATTTCATTCCACTTTCCT-ATTTCT---CAACAACAACTTCTCT-----CATC
Scolochloa_festuaceae					CTAAGACTAGATTTCATTCCACTTTCCT-ATTTCT---CAACAACAACTTCTCT-----CATC
Nephelochloa_orientalis					CTAAGACTAGATTTCATTCCACTTTCCT-ATTTCT---CAACAACAACTTCTCT-----CATC
Holcus_lanatus					CTAAGACTAGATTTCATTCCACTTTCCT-ATTTCT---CAACAACAACTTCTCT-----CATC
Poa_subgen_Stenopoa					CTAAGACTAGATTTCATTCCACTTTCCT-ATTTCT---CAACAAGAACTTATCTCATCACATC
Festuca_ovina					CTAAGACTAGATTTCATTCCACTTTCCT-ATTTCT---CAACAACAACTTCTCT-----CATC
Desmazeria_sicula					CTAAGACTAGATTTCATTCCACTTTCCT-ATTTCT---CAACAACAACTTCTCT-----CATC
Catapodium_rigidum					CTAAGACTAGATTTCATTCCACTTTCCT-ATTTCT---CAACAACAACTTCTCT-----CATC
Catapodium_marinum					CTAAGACTAGATTTCATTCCACTTTCCT-ATTTCT---CAACAACAACTTCTCT-----CATC
Castellia_tuberculosa					CTAAGACTAGATTTCATTCCACTTTCCTAATTTCT---CAACAACAACTTCTCT-----CATC
Ammochloa_palestina					CTAAGACTAGACTTCATTCCACTTTCCT-ATTTCT---CAACAACAACTTCTCT-----AATC
Alopecurus_arundinaceus					CTAAGACTAGATTTAATTCCACTTTCCT-ATTTCT---CAACAAGAACTTCTCT-----CATC
Poa_palustris					CTAAGACTAGATTTCATTCCACTTTCCT-ATTTCT---CAACAACAACTTCTCTCATCACATC
Festuca_ovina_NC_019649					CTAAGACTAGATTTCATTCCACTTTCCT-ATTTCT---CAACAACAACTTCTCT-----CATC
Festuca_altissima		57 (Deletion)	48746	48802	CTA---------------------------------------------------------ATC
Festuca_arundinacea					CTAAGACTAGATTTCATTCCACTTTCCT-ATTTCT---CAACAACAACTTCTCT-----CATC
Festuca_pratensis					CTAAGACTAGATTTCATTCCACTTTCCT-ATTTCT---CAACAACAACTTCTCT-----CATC
Lolium_multiflorum					CTAAGACTAGATTTCATTCCACTTTCTT-ATTTCT---CAACAATAACTTCTCT-----CATC
Lolium_perenne					CTAAGACTAGATTTCATTCCACTTTCCT-ATTTCT---CAACAATAACTTCTCT-----CATC
Deschampsia_antarctica					CTAAGACTAGATTTCATTCCACTTTGCT-ATTTCT---CAACAACAATTTATCT-----CATC
Puccinellia_nuttalliana					CTAAGACTAGATTTCATTCCACTTTCCTATTTCTC---AAACAACAACTTCTCT-----CATC
Dactylis_glomerata					CTAAGACTAGATTTCATTCCACTTTCCT-ATTTCT---CAACAACAACTTCTCT-----CATC
Kengyilia_melanthera					CTAAGACTGGATTTCATTCCACTTTCC-GATTTCTGAACAACAA--------CTTATGTCATC
Helictochloa_hookeri					CTAAGACTGGATTTGATTCCACTTTCCTATTTCT----CAACAACAACTTCTCT-----CATC
Lamarckia_aurea	20				AATATGGTCTAGCATACCTTATATAAACAGAATTCTAAGGTTTCTTTATTTTATTATGCAA-T-------AAGAA
Ventenata_macra					AGTATGGTGTAGCGTACCTTATACAAACAGAATTCTAAGGTTTCCTTATTTTATTATGCAA-T-------AAGAA
Scolochloa_festuaceae					AATATGGTGTAGCATACCTTATACAAACAGAATTCTAAGGTTTCTTTATTTTATTATGCAA-T-------AAGAA
Nephelochloa_orientalis					AGTATGGTGTAGCGTACCTTATACAAACAGAATTCTAAGGTTTCCTTATTTTATTATGCAA-T-------AAGAA
Holcus_lanatus					AGTATGGTGTAGAATACCTTATACAAACAGAATTCTAAGGTTTCTTTATTTTATTATGCAA-T-------AAGAA
Poa_subgen_Stenopoa					AGTATGGTGTAGCGTACCTTATACAAACAGAATTCTAAGGTTTCTTTATTTTCTTATTCAATT-------AAGAA
Festuca_ovina					AATATGGTCTAGCATACCTTATACAAACAGAATTCTAAGGTTTCTTTATTTTATTATGCAA-T-------AAGAA
Desmazeria_sicula					AATATGGTGTAGCATACCTTATACAAACAGAATTCTAAGGTTTCTTTATTTTATTATGCAA-TAAGAAGAAAGAA
Catapodium_rigidum					AATATGGTGTAGCATACCTTATACAAACAGAATTCTAAGGTTTCTTTATTTTATTATGCAA-T-------AAGAA
Catapodium_marinum					AATATGGTGTAGCATACCTTATACAAACAGAATTCTAAGGTTTCTTTATTTTATTATGCAA-T-------AAGAA
Castellia_tuberculosa		69 (Deletion)	48869	48937	AAT---------------------------------------------------------------------GAA
Ammochloa_palestina					AATATGGTGTAGCATACTTTATACAAACAGAATTCTAAGGTTTCTTTATTTTATTATGCAA-T-------AAGAA
Alopecurus_arundinaceus					AGTATGGTGTAGCGTACCTTATACAAACAGAATTCTAAGGTTTCCTTATTTTATTATGCAA-T-------AAGAA
Poa_palustris					AGTATGGTGTAGCGTACCTTATACAAACAGAATTCTAAGGTTTCTTTATTTTCTTATTCAATT-------AAGAA
Festuca_ovina_NC_019649					AATATGGTCTAGCATACCTTATACAAACAGAATTCTAAGGTTTCTTTATTTTATTATGCAA-T-------AAGAA
Festuca_altissima					AATATGGTGTAGCATACCTTATACAAACAGAATTCTAAGGTTTCTTTATTTTATTATGCCA-T-------AAGAA
Festuca_arundinacea					AATATGGTGTATCATACCTTATACAAACAGAATTATAAGGTTTCTTTATTTTATTATGCCA-T-------AAGAA
Festuca_pratensis					AATATGGTGTATCATACCTTATACAAACAGAATTATAAGGTTTCTTTATTTTATTATGCCA-T-------AAGAA
Lolium_multiflorum					AATATGGTGTATCATACCTTATACAAACAGAATTATAAGGTTTCTTTATTTTATTATGCCA-T-------AAGAA
Lolium_perenne					AATATGGTGTATCATACCTTATACAAACAGAATTATAAGGTTTCTTTATTTTATTATGCCA-T-------AAGAA
Deschampsia_antarctica					AGTATGGTCTAGCATACCTTATACAAACAGAATTCTAAGGTTTCTTTATTTTATTATGCAA-T-------AAGAA
Puccinellia_nuttalliana					AGTATGGTGTAGCGTACCTTATACAAACAGAATTCTAAGGTTTCTTTATTTTATTATGCAA-T-------AAGAA
Dactylis_glomerata					AATATGGTGTAGCATACCTTATATAAACAGAATTCTAAGGTTTCTTTATTTTATTATGCAA-T-------AAGAA
Kengyilia_melanthera					AGTATGGTGTAGCGTATCTTATGCAAACGGAATTCTAAGGTTTCTTTATTTTATTATGCAAT--------AAGAA
Helictochloa_hookeri					AGTATGGTGTAACATATCTTATACAAAGAGAATTCTAAGGTTTCTTTATTTTATTATTC--TTGATAGTGGATAA
Lamarckia_aurea	21				CCATTCTCTTTTTC------TTTGGTTGCGGGA----------------AAGGAAAACCCAAACTCAAACTTTTATAAGGA-GCGCAATTCCTAGTAAAAAAATCCTA-AGATCCTTCCACTTACATC-----AAAA----GGAATTTTTCC
Ventenata_macra					GCATTCTCTTTTTC------TTTGTTTG---------------------CGGGAAAACCCAAACTAAAACTTTTATAAGGA-GCACAATTCTTAGTAAAAAAATCCTA-AGATCCTTCCACTTACATC-----AAAAATTCGGAATTTTTCC
Scolochloa_festuaceae					CCATTCTCTTTTTC------TTTGGTTG---------------------CGGGAAAACCCAAACTCAAACTTTTATAAGGA-GCGCAATTCCTAGTAAAAAAATCCTA-AGATCCTTCCACTTACATC-----AAAA----GAAATTTTTCC
Nephelochloa_orientalis					CCATTCTCTTTTTC------TTTGGTTG---------------------CGGAAAAACCCAAACTAAAACTTTTATAAGGA-GCACAATTCTTAGTAAAAAAATCCTA-AGATCCTTCCACTTACATC-----AAAAATTCGGAATTTTTCC
Holcus_lanatus					CCATTCTCTTTTTC------TTTGGTTG---------------------CGGGAAAACCCAAACTGAAACTTTTATAAGGA-GCGCAATTCCTAGTAAAAAAATCCTA-AGATCCTTCCACTTACATA-----AAAA----GGAATTTTTCC
Poa_subgen_Stenopoa					CCATTCTCTTTTTC------TTTGGTTG---------------------CGGGAAAACCCAAACTCAAACTTTTATAAGGA-GCGCAATTCCTAGTAAAAAAATCCTA-AGATCCTTCCACTTACATC-----AAAAG---GAATTTTTTCC
Festuca_ovina					CCATTCTCTTTTTCTTTGGTTTTGGTTG---------------------TGGGAAAACCCAAACTCAAACTTTTATAAGGAGGCGCAATTCCTAGTAAAAAAATCCTATAGATCCTTCCACTTACATC-----AAAA----GGAATTTTTCC
Desmazeria_sicula					CCATTCTCTTTTTC------TTTGGTTG---------------------CGGGAAAACTCAAACTCAAACTTTTATAAGGA-GTGCAATTCCGAGTAAAAAAATTCTA-AGATCCTTACACTTACATC-----AAAA----GGCATTTTTCC
Catapodium_rigidum					CCATTCTCTTTTTC------TTTGGTTG---------------------CGGGAAAACTCAAACTCAAACTTTTATAAGGA-GCGCAATTCCGAGTAAAAAAATTCTA-AGATCCTTACACTTACATC-----AAAA----GGCGTTTTTCC
Catapodium_marinum					CCATTCTCTTTTTC------TTTGGTTG---------------------CGGGAAAACTCAAACTCAAACTTTTATAAGGA-GCGCAATTCCGAGTAAAAAAATTCTA-AGATCCTTACACTTACATC-----AAAA----GGCGTTTTTCC
Castellia_tuberculosa					CCATTCTCTTTTTC------TTTGGTTG---------------------CGGGAAAACCCAAACTCAAACTTTTATAAGGA-GCGCAATTCCTAGTAAAAAAATCCTAGAGATCCTT-------CATC-----AAAA----GGAATTTTTCC
Ammochloa_palestina					CCATTCTCTTTTTC------TTTGGTTGCGGGA----------------AAGGAAAACCCAAACTCAAACTTTTATAAGGA-GCGCAATTCCTAGTAAAAAAATCCTA-AGATCCTTCCACTTACATCAAAAGAAAA----GGAATTTTTCC
Alopecurus_arundinaceus					CCATTCTCTTTTTC------TTTGATTG---------------------CGGGAAAACCCAAACTAAAACTTTTATAAGGA-GCATAATTCTTAGTAAAAAAATCCTA-AGATCCTTCCACTTACATC-----AAAA----GGAATTTTTCC
Poa_palustris					CCATTCTCTTTTTC------TTTGGTTG---------------------CGGGAAAACCCAAACTCAAACTTTTATAAGGA-GCGCAATTCCTAGTAAAAAAATCCTA-AGATCCTTCCACTTACATC-----AAAAG---AAATTTTTTCC
Festuca_ovina_NC_019649					CCATTCTCTTTTTCTTTGGTTTTGGTTG---------------------TGGGAAAACCCAAACTCAAACTTTTATAAGGAGGCGCAATTCCTAGTAAAAAAATCCTATAGATCCTTCCACTTACATC-----AAAA----GGAATTTTTCC
Festuca_altissima					CCATTCTCTTTTTC------TTTGGTTG---------------------CGGGAAAACCCAAACTCAAACTTTTATAAGGA-GCGCAATTCCTAGTAAAAAAATCCTA-AGATCCTTCCACTTACATC-----AAAA----GGAATTTTTCC
Festuca_arundinacea					CCATTCTCTTTTTC------TTTGGTTGCAGGAAAACCCAAACTTTTATCAGGAAAACC------CAAACTTTTATAAGGA-GCGCAATTCCTAGTAAAAAAATACTA-A-----------------------AAAA----GGGATTTTTCC
Festuca_pratensis					CCATTCTCTTTTTC------TTTGGTTG---------------------CAGGAAAACC------CAAACTTTTATAAGGA-GCGCAATTCCTAGTAAAAAAATACTA-A-----------------------AAAA----GGGATTTTTCC
Lolium_multiflorum					CCATTCTCTTTTTC------TTTGGTTG---------------------CAGGAAAACC------TAAACTTTTATAAGGA-GCGCAATTCCTAGTAAAAAAATACTA-A-----------------------AAAA----GGGATTTTTCC
Lolium_perenne					CCATTCTCTTTTTC------TTTGGTTG---------------------CAGGAAAACC------CAAACTTTTATAAGGA-GCGCAATTCCTAGTAAAAAAATACTA-A-----------------------AAAA----GGGATTTTTCC
Deschampsia_antarctica					CCATTCTCTTTTTC------TTTGGTTG---------------------CGGGAAAACCCAAACTCAAACTTTTATAAGGA-GCACAATTCCTAGTAAAAAAATCCTA-AGATCCTTTCACTTACATC-----AAAA----GGAATTTTTCC
Puccinellia_nuttalliana		146 (Deletion)	48973	49118	CCA--------------------------------------------------------------------------------------------------------------------------------------------------TCC
Dactylis_glomerata					CCATTCTCTTTTTC------TTTGGTTGCGGGA----------------AAAGAAAACCCAAACTCAAACTTTTATAAGGA-GCGCAATTCCTAGTAAAAAAATCCTA-AGATCCTTCCACTTACATC-----AAAA----GGAATTTTTCC
Kengyilia_melanthera					-------------------CTTTAGTTGCGGGAAAACCCAAAT---------GAAAACTTTTA-------TTTTATAGCGA-GCGCAATTTCTAGTAAAAAA---CCCTGTATCCTTCCACTTAGATCAAAA---------GGAATTTTTCC
Helictochloa_hookeri					CCATTCTCTTTTTCTTTGGTT---------------------------GCGGGAACACCCAAACTCAAACTTTTATAAGGA-GCGCAATTCCTAGTAAAAAAATCCTA-AGATCCTTCCAATTACATCAAAA---------GGCATTTTTCC
Lamarckia_aurea	22				TTTAAATAA-------------------------AATTATAGAATTTATTGCAC----TT-----TCTTTTTATTTTTCTAATTCGCAAATGCATTTTTCTAT-ATA-GAATAGAATTGATTCCTATTTCTATAATGGAATTGGAATTGGATTTCAGATATTTTCAATTTGATATGGCTTGGACGAATAA
Ventenata_macra					TTTAAAAAA--------------------------ATTATAGAATTTATTGAA----CTT----TTTATTTTATTTCTCTAATTCGCAAATGCATTTTTCTA-TATA-GAATAGAATTGATTCCAATTTCTATAA------TGGAACTGGATTTCAGATATTTTCAATTTGATATGGTTCGGACGAATAA
Scolochloa_festuaceae					TTTAAATAA-------------------------AATTATAGAATTTATTAAAC----TT-----TCTTTTTATTTCTCTAATTCGCAAATGCATTTTTCTAT-ATA-GAATAGAATTGATTCAAATTTCTATAA------TGGAATTGGATTTCAGATATTTTCAATTTGATATGGCTCGGACGAATAA
Nephelochloa_orientalis					TTTTAAAAA--------------------------ATTATAGAATTTATTGAACTTTCTT----TTTATTTTATTTCTCTAATTCGCAAATGCATTTTTCTA-TATA-GAATAGAATTGATTCCAATTTCTATAA------TGGAACTGGATTTCAGATATTTTCAATTTGATATGGCTCGGACGAATAA
Holcus_lanatus					TTTAAATAA-------------------------AATTATAGAATTTATTGAACTTTATT-----TCTTTTTATTTCTCTAATTCGCAAATGCATTTTTCTAT-ATA-GAATAGAATTTATTCCAATTTCTATAA------TGCAATTGGATTTCATATATTTTCAATTTGATATGGCTCGGACGAATAA
Poa_subgen_Stenopoa					TTTAAAAAA-------------------------CATTATAGAATTTATTGAACTTTCTTTTTATTTATTTTATTTCTCTAATTCGCAAATGCATTTTTCTATCATA-GAATAGAATTGATTCCAATTTCTATAA------TGGAACTGGATTTCAAATATTTTCAATTTGATATGGCTGGGACGAATAA
Festuca_ovina					CTTAAATAGGAACGATATTCTTAAATAAGATTATAGTTATAGAATTTATTGAAC----TT-----TCTTTTTATTTCTCTAATTCGCAAATGCATTTTTCTATCATA-GAATAGAATTGATTCCAATTTCTATAA------TGGAATTGGATTTCAGATATTTTCAATTTGATATGGCTCGGAGGAATAA
Desmazeria_sicula					TTTAAATAA--------------------AATTAAATTATAGAATTTATTGAAC----TT-----TGTTTTTATTTCTCTAATTCCAAAATGCATTTTTCTATTATA-GAATAGAATGAATTCCTATTTCTATAA------TGGAATTGGATTTCAGATATTTTCAATTTAATATGGCTCGGACGAATAA
Catapodium_rigidum					TTTAAATAA--------------------AATTAAATTATAGAATTTATTGAAC----TT-----TGTTTTTATTTCTCTAATTCCAAAATGCATTTTTCTATTATA-GAATAGAATGAATTCCTATTTCTATAA------TGGAATTGGATTTCAGATATTTTCAATTTAATATGGCTCGGACGAATAA
Catapodium_marinum					TTTAAATAA--------------------AATTAAATTATAGAATTTATTGAAC----TT-----TGTTTTTATTTCTCTAATTCCAAAATGCATTTTTCTATTATA-GAATAGAATGAATTCCTATTTCTATAA------TGGAATTGGATTTCAGATATTTTCAATTTAATATGGCTCGGACGAATAA
Castellia_tuberculosa		184 (Deletion)	50852	51035	TTT----------------------------------------------------------------------------------------------------------------------------------------------------------------------------------------TAA
Ammochloa_palestina					TTTAAATAA-------------------------AATTATAGAATTTAAAGAAC----TT-----TCTTTTTATTTTTCTAATTCGCAAATGCATTTTTCTAT-ATATAGATAGAATTGATTCCAATTTCTATAA------TGGAATTGGATTTCAGATATTTTCAATTTGATAGGGCTTGGACGAAAAA
Alopecurus_arundinaceus					TTTAAAAAA--------------------------ATTATAGAATTTATTGAACTTTCTT----TTTATTTTATTTCTCTAATTCGCAAATGCATTTTTCTATTATA-GAATAGAATTGATTCCAATTTCTATAA------TTGAACTGGATTTCAGATATTTTCAATTTGATATGGCTCGGACGAATAA
Poa_palustris					TTTAAAAAA-------------------------CATTATAGAATTTATTGAACTTTCTTTTTATTTATTTTATTTCTCTAATTCGCAAATGCATTTTTCTATCATA-GAATAGAATTGATTCCAATTTCTATAA------TGGAACTGGATTTCAAAGATTTTCAATTTGATATGGCTGGGACGAATAA
Festuca_ovina_NC_019649					TTTAAATAA-------------------------AATTATAGAATTTATTGAAC----TT-----T-TTTTTATTTCTCTAATTCGCAAATGCATTTTTCTAT-ATA-GAATAGAATTGATTCCAATTTCTATAA------TGGAATTGGATTTCAGATATTTTCAATTTGATATGGCTCGGAGGAATAA
Festuca_altissima					TTTAAATAA-------------------------AATTATAGAATTTATTGAAC----TT-----T-TTTTTATTTCTCTAATTCGCAAATGCATTTTTCTAT-ATA-GAATAGAATTGATTCCAATTTCTATAA------TGGAATTGGATTTCAGATATTTTCAATTTGATATGGCTCGGACGAATAA
Festuca_arundinacea					TTTAAATAA-------------------------AATTATAGAATTTATTGAAC----TT-----T-TTTTTATTTCTCTAATTAGCAAATGCATTTTTCTAT-ATA-GAATAGATTTGATTCCAATTTCTATAA------TGGAATTGGATTTCAGATATTTCCAATTTGATATGGCTCGGACGAATAA
Festuca_pratensis					TTTAAATAA-------------------------AATTATAGAATTTATTGAAC----TT-----T-TTTTTATTTCTCTAATTAGCAAATGCATTTTTCTAT-ATA-GAATGGATTTGATTCCAATTTCTATAA------TGGAATTGGATTTCAGATATTTTCAATTTGATATGGCTCGGACGAATAA
Lolium_multiflorum					TTTAAATAA-------------------------AATTATAGAATTTATTGAAC----TT-----T-TTTTTATTTCTCTAATTAGCAAATGCATTTTTCTAT-ATA-GAATGGATTTGATTCCAATTTCTATAA------TGGAATTGGATTTCAGATATTTTCAATTTGATATGGCTCGGACGAATAA
Lolium_perenne					TTTAAATAA-------------------------AATTATAGAATTTATTGAAC----TT-----T-TTTTTATTTCTCTAATTAGCAAATGCATTTTTCTAT-ATA-GAATGGATTTGATTCAAATTTCTATAA------TGGAATTGGATTTCAGATATTTTCAATTTGATATGGCTCGGACGAATAA
Deschampsia_antarctica					TTTAAATAA-------------------------AATTATAGAATTTATTGAAC----TT-----TGTTTTTATTTCTCTAATTCGCAAATGCATTTTTCTAT-ATA-GAATAGAATTGATTCCAATTTCTATAA------TGGAATCGGATTTCAGATATTTTCAATTTGATATGGCTTGGACGAATAA
Puccinellia_nuttalliana					TTTAAATAA-------------------------AATTATAGAATTTATTGAAC----TT-----TCTTTTTATTTCTCTAATTCGCAAATGCATTTTTCTAT-AAA-GAATAGAATTGATTCCAATTTCTATAA------TGGAATTGGATTTCAGATATTTTCAATTTGATATGGCTCGGACGAATAA
Dactylis_glomerata					TTTAAATAA-------------------------AATTATAGAATTTATTGCAC----TT-----TCTTTTTATTTTTCTAATTCGCAAATGCATTTTTCTAT-ATA-GAATAGAATTGATTCCTATTTCTATAATGGAATTGGAATTGGATTTCAGATATTTTCAATTTGATATGGCTTGGACGAATAA
Kengyilia_melanthera					TTTAAATAAAA---------------------------------------------------------TTTTA---------------------------------------------------------------------------------------------------------------------
Helictochloa_hookeri					TTTAAATA-------------------------AAATTATAG-----------------------------TATTTCTCTAATTCACAAATGTATTTTTTC------TATATAGAATTGATTCCAATTTCTATAA------TGGAATTGGATTTCAGATATTTTCCATTTGATATGGCTCGGACAAATAA
Lamarckia_aurea	23				AGTGATGAATTCCATGATTCAAAATAAAAAAAAACTAAGAGATGGATGAAATTACACAAGGAATCTTTGTC
Ventenata_macra					AGTGATGAATTCAATGATTC------AAAAAAAACTAAGAGATGGATGAAATTACACAAGGAATCTTTGTC
Scolochloa_festuaceae					AGTGATGAATTCAATGATTC-----AAAAAAAAACTAAGAGATGGATGAAATTACACAAGGAATCTTTGTC
Nephelochloa_orientalis					AGTGATGAATTCAATGATTC------AAAAAAAACTAAGAGATGGATTAAATTACACAAGGAATCTTTGTC
Holcus_lanatus					AGTGATGAATTCAATGATTC------AAAAAAAACTAAGAGATGGATTAAATTAGACAAGGAATCTTTGTC
Poa_subgen_Stenopoa					AGTGATGAATTCAATGATTC------AAAAAAAACTAAGAGATGGATGAAATTACACAAGAAATCTTTGTC
Festuca_ovina					AGTGATGAATTCAATGATTC--A--AAAAAAAAACTAAGAGATGGATTAAATTACACAAGGAATCTTTGTC
Desmazeria_sicula					AGTGATGAATTCAATGATTC-----AAAAAAAAACTAAGAGATGGATGAAATTACACAAGGATTTTTTGTC
Catapodium_rigidum					AGTGATGAATTCAATGATTC-----AAAAAAAACTTAAGAGATGGATGAAATTACACAAGGAATTTTTGTC
Catapodium_marinum					AGTGATGAATTCAATGATTC-----AAAAAAAACTTAAGAGATGGATGAAATTACACAAGGAATTTTTGTC
Castellia_tuberculosa					AGTGATGAATTCAATGATTC-----AAAAAAAAACTAAGAGATGGATGAAATTACACAAGGAATCTTTGTC
Ammochloa_palestina					AGTGATGAATTCAATGATTCA----AAAAAAAAACTAAGAGATGGATGAAATTACACAAGGAATCTTTGTC
Alopecurus_arundinaceus					AGTGATGAATTCAATGATTC------AAAAAAAACTAAGAGATGGATGAAATTACACAAGGAATATTTGTC
Poa_palustris					AGTGATGAATTCAATGATTC------AAAAAAAACTAAGAGATGGATGAAATTACACAAGAAATCTTTGTC
Festuca_ovina_NC_019649					AGTGATGAATTCAATGATTCAAA--AAAAAAAAACTAAGAGATGGATTAAATTACACAAGGAATCTTTGTC
Festuca_altissima					AGTGATGAATTCAATGATTC-----AAAAAAAAACTAAGAGATGGATGAAATTACACAAGGAATCTTTGTC
Festuca_arundinacea					AGTGATGAATTCAATGATTCAAA--AAAAAAAAACTAAGAGATGGATGAAATTACACAAGGAATCTTTGTC
Festuca_pratensis					AGTGATGAATTCAATGATTC-----AAAAAAAAACTAAGAGATGGATGAAATTACACAAGGAATCTTTGTC
Lolium_multiflorum					AGTGATGAATTCAATGATTC--A--AAAAAAAAACTAAGAGATGGATGAAATTACACAAGGAATCTTTGTC
Lolium_perenne					AGTGATGAATTCAATGATTC--A--AAAAAAAAACTAAGAGATGGATGAAATTACACAAGGAATCTTTGTC
Deschampsia_antarctica		66 (Deletion)	51493	51558	AG------------------------------------------------------------------GTC
Puccinellia_nuttalliana					AGTGATGAATTCAATGATTC-----AAAAAAAAACTAAGAGATGGATTAAATTACACAAGGAATCTTTGTC
Dactylis_glomerata					AGTGATGAATTCAATGATTCAAAATAAAAAAAAACTAAGAGATGGATGAAATTACACAAGGAATCTTTGTC
Kengyilia_melanthera					AGTGATGAACTCAATGAT------TAAAAAAAAACTAAGAGATGGATGAAATTACACAAGGAATCCTGGTC
Helictochloa_hookeri					AGTGATGAATTTAATGATTC------AAAAAAAACTAAGAGATGGATGAAATTACACAAGGAATCTTTGTC
Lamarckia_aurea	24				AAAA----AAAGAAGCACTTC--TTTTTATTTTTAGAGAAG-------GAAAAAATGGAT
Ventenata_macra					T-------AAAGAAGCACTTC-TTT-TTCTTTTTAGAAAAG----GAAAAAAAAAGATAT
Scolochloa_festuaceae					T-------AAAGAAGCACTTC--------TTTTTAGAGAAG------GAAAAAAATATAT
Nephelochloa_orientalis					T-------AAAGAAGCACTTC-TTT-TTCTTTTTAGAAAAG----G-AAAAAAAAGATAT
Holcus_lanatus					T-------AAAGAAGCACTTC--------TTTTTAGAGAAG------GAAACAAATAGAT
Poa_subgen_Stenopoa					T-------AAAGAAGCACTTC-TTTATTCTTTTTAGAAAAG----GAAAAAAATATATAT
Festuca_ovina					T-------AAAGAAGCACTTC------------TAGAAGGA------AAAAAA-ATATAT
Desmazeria_sicula		57 (Deletion)	52935	52991	T---------------------------------------------------------AT
Catapodium_rigidum		57 (Deletion)	52935	52991	T---------------------------------------------------------AT
Catapodium_marinum		57 (Deletion)	52935	52991	T---------------------------------------------------------AT
Castellia_tuberculosa					T-------AAAGAAGCACTTCTTTTTAGATTTTTAGAGAAG------GAAAAAAATATAT
Ammochloa_palestina					TAAAGAATAAAGAAGCACTTC--TTTTTATTTTTAGAGAAA-------GAAAAAATATAT
Alopecurus_arundinaceus					T-------AAAGAAGCACTTC-TTT-TTCTTTTTAGAAAAG----G---AAAAAATATAT
Poa_palustris					T-------AAAGAAGCACTTC-TTTATTCTTTTTAGAAAAG----GAAAAAAATATATAT
Festuca_ovina_NC_019649					T-------AAAGAAGCACTTC------------TAGAAGGA------AAAAAATATATA-
Festuca_altissima					T-------AAAGAAGCACTTC--------TTTTTATAGAAGTAGAAAGAAAAAAATATAT
Festuca_arundinacea					T-------AAAGAAGCACTTC--------TTTTTATAGAAGTAGAAAGAAAAAAATATAT
Festuca_pratensis					T-------AAAGAAGCACTTC--------TTTTTATAGAAGTAGAAAGAAAAAAATATAT
Lolium_multiflorum					T-------AAAGAAGCACTTC--------TTTTTATAGAAGTAGAAAGAAAAAAATATAT
Lolium_perenne					T-------AAAGAAGCACTTC--------TTTTTATAGAAGTAGAAAGAAAAAAATATAT
Deschampsia_antarctica					T-------AAAGAAGCACTTC--------TTTTTAGAGAAA------GAAAAAACTATAT
Puccinellia_nuttalliana					T-------AAAGAAGCACTTA--TTTTTCTTTTTAGAAAAG------GAAAAAAAGATAG
Dactylis_glomerata					AAAA----AAAGAAGCACTTC--TTTTTATTTTTAGAGAAG-------GAAAAAATAGAT
Kengyilia_melanthera					-----AATATAGAGGCACT--TTTTTTTCTTTTTAAAGAAGT------TTAAAAATATAT
Helictochloa_hookeri					TAAGGAAGCA---------------CTTCTTTTTAGAGA-------AAGAAAAATTATAT
Lamarckia_aurea	25				GAGATTAGGCTCCCCTTTA-------CTTTTTTTTCATTTCTTAATTTTA-----TATTCTGTTATTCCGACGAATCTTTTTTTAGTCTTGCTTATCTTAATCTTACTTTCCTTGT
Ventenata_macra		110 (Deletion)	53023	53132	CAG--------------------------------------------------------------------------------------------------------------AGT
Scolochloa_festuaceae					GAGATTAGGCTCCCCTTTA---TTTTTTTTTTTTGCATTTCTTAATTTTA-----TATTCTGCTATTCCGACGAATCTTTTTTTAGTCTTGCTTATCTTAATCTTACTTTCCTAGT
Nephelochloa_orientalis					CAGATTAGGCTCCCCTTTA-------TTTTTTTTGCGTTTCTTAATTTTA-----TATTCTGCTATTCCGACGAATCTTTTTTTAGTCTTGCTTATGTTAATCTTACTTTCCTAGT
Holcus_lanatus					GAGATTAGGCTCCCCTTTA------TTTTTTTTTGCATTTCTGAATTTTA-----TATTCTGCTATTCCGACGAATCTTTTTTTAGTCTTGCTTATCTTAATCTTACTTTCCTAGT
Poa_subgen_Stenopoa					GAGATTAGGCTCCCTTTTA----G-TTTTTTTTTGCGTTTCTTA-----A-----TATTCTGCTATTTCGACGAATCTTTTTTTAGTCTTGCTTATCTTAATCTTACTTTCCTAGT
Festuca_ovina					GAGATTAGGCTCCCCTTTA-------TTTTTTTTTCATTTCTTAATTTTA-----TATTCTGCTATTCCGACGAATCTTTTTTTAGTCTTGCTTATCTTA-----ACTTTCCTAGT
Desmazeria_sicula					TAGATTAGGCTCCCCTTTA-------TTTTTTTTGCATTTCTTAATTTTA-----TATTCTGCTATTCCGACGAATCTTTTTTTAGTCTTGCTTATTTTAATCTTACTTTCCTAGT
Catapodium_rigidum					GAGATTAGGCTCCCCTTTA------TTTTTTTTTGCATTTCTTAATTTTA-----TATTCTGCTATTCCGACGAATCTTTTTTTAGTCTTGCTTATTTTAATCTTACTTTCCTAGT
Catapodium_marinum					GAGATTAGGCTCCCCTTTA-----TTTTTTTTTTGCATTTCTTAATTTTA-----TATTCTGCTATTCCGACGAATCTTTTTTTAGTCTTGCTTATTTTAATCTTACTTTCCTAGT
Castellia_tuberculosa					GAGATTAGGCTCCCCTTTA------TTTTTTTTTTCATTTCTTAATTTTA-----TATTCTGCTATTCCGACGAATCTTTTTTTAGTCTTGCTTATCTTAATCTTACTTTTCTAGT
Ammochloa_palestina					GAGATTAGGCTCCC-------------CTTTTTTTCATTTCTTAATTTTA-----TATTCTGCTATTCCGACGAATCTTTTTTGAGTCTTGCTTATCTTAATCTTACTTTCCTAGT
Alopecurus_arundinaceus					CAGATTAGGCTCCCCTTTATTTTTTTTTTTTTTTGCGTTTCTTAATTTTA-----TATTCTGCTATTCCGACGAATCTTTTTTTAGTCTTGCTTATGTTAATGTTACTTTCCTAGT
Poa_palustris					GAGATTAGGCTCCCTTTTC----GTTTTTTTTTTGCGTTTCTTA-----A-----TATTCTGCTATTTCGACGAATCTTTTTTTAGTCTTGCTTATCTTAATCTTACTTTCCTAGT
Festuca_ovina_NC_019649					GAGATTAGGCTCCCCTTTA-------TTTTTTTTTCATTTCTTAATTTTA-----TATTCTGCTATCCCGA--AATCTTTTT------TATCTTATCTT------ACTTTCCTAGT
Festuca_altissima					GAGATTAGGCTCCCCTTT-------ATTTTTTTTGCATTTCTTAATTTTA-----TATTCTGCTATTCCGACGAATCTTTTTTTAGTCTTGCTTATCTTAATCTTACTTTCCTAGT
Festuca_arundinacea					TAGATTAGGCTCCCCTTT-------ATTTTTTTTGCATTTCTTAATTTTA-----TATTCTGCTATTCCGACGAATCTTTTTTTAGTCTTGCTTATCTTAATCTTACTTTCCTAGT
Festuca_pratensis					TAGATTAGGCTCCCCTTT-------ATTTTTTTTGCATTTCTTAATTTTA-----TATTCTGCTATTCCGACGAATCTTTTTTTAGTCTTGCTTATCTTAATCTTACTTTCCTAGT
Lolium_multiflorum					TAGATTAGGCTCCCCCTT----TA-TTTTTTTTTGCATTTCTTAATTTTA-----TATTCTGCTATTCCGACGAATCTTTTTTTAGTCTTGCTTATCTTAATCTTACTTTCCTAGT
Lolium_perenne					TAGATTAGGCTCCCCCTT----TATTTTTTTTTTGCATTTCTTAATTTTA-----TATTCTGTTATTCCGACGAATCTTTTTTTAGTCTTGCTTATCTTAATCTTACTTTCCTAGT
Deschampsia_antarctica					GAGATTAGGCTCCCCTTTA------TTTTTTTTTGCATTTCTTAATTTTA-----TATTCTGCTATTCCGAAGAATCTTTTTTTAGTCTTGCTTATCTTAATCTTACTTTCCTAGT
Puccinellia_nuttalliana					AAGATGAGGCTCCCCTTTA----TTTTTTTTTTTGCGTTTCTAAATTTTATATTATATTCTGCTATTCCGACGAATCCTTTTTTAGTTTTGCTTATCTTAATTTTACTTTCCTAGT
Dactylis_glomerata					GAGATTAGGCTCCCCTTTA--------TTTTTTTTCATTTCTTAATTTTA-----TATTCTGCTATTCCGACGAATCTTTTTTTAGTCTTGCTTATCTTAATCTTACTTTCCTTGT
Kengyilia_melanthera					GAGATTAGGTTCCCCTTTA--------TTTTTTTGCGTTTCTTAATT-----TTGTATTCCGCTATTTCGACGAAT-ATTTTTTTATTCTTGCTTATCTTTATCTTATCTTATTTTATTTTCCTAGT
Helictochloa_hookeri					GAGATTAGGCTCCCCTTTATTTTTTTTCT-------ATTTCTTAATT-----TTATATTCTGCTATTCCGACGAATCCTTTTTTTAGTCTTGCTTATCTTAATC----------TTACTTTCTTAGT
Lamarckia_aurea	26				AAGAACTCTATTTCAGAAC-TATGAG-AGAGAATATTCTATTTTATTAATTTACTC-TTTACTTTA-----TTTTTTTC--TATTTAAAGTGGATCAA-------TTTAGATAATGTAA-TTTAGATAATGTAA-ATAT---------------------AAGC-AAAGTACTAAATATACTTAAAACAAGGCAGTAATTCGCAAGATGGAGAAAATAATTGCAGTTATTATAGGGAAGTCTAGAGATATCCTATTTGAAGGAGGACGGGATTCAAATCAGGGAAGGAATCCTTCTTTCTATTAATTTGATAGAAATTCAATTCGTTTTTCTTTTCCTATCTCTATGATTTTGATTCTCGATGAATGAGCCTGTGGTAATGCTTTTACCTCTAT--TCT…
Ventenata_macra					AAGAACTCTATTTCAGAAC-TATGAG-ACAGAATATTCTGT-TTTCTTATTTAATC-TTTACTTTA---TTTT-----TTCTATTTAAAGTGGATCAA-------TTTAGATAATGTAATTTTAGATAATGTAA-ATTT---------------------AAGC-AAACCACTAAATATACTTAAAACAAGGTAGTAATTCGCAAGATGGAGAAAATAATTGAAGTTATTATAGGGAAGTATAGAGATATCCTATTTGAAGGAGGAGGAGATTCAAATCAGGGAAGAGATCCTTCTTTCTATTAATTTGATAGA-----AATTCGTTTTTCTTTTCCTGTCTCTATGATTTTTATTTTCGATGAATGAGCCTGTGGTAATGCTTTTACCTCTAT--TCT…
Scolochloa_festuaceae					AAGAACTCTATTTCAGAAC-TATGAG-AGAGAATATTCTGT-TTTCTTATTTACTC-TTTACTTTA------TTTTTTC--TATTTAAAGTGGATCAA-------TTTAGATAATGTAA-TTTAGATAATGTAA-ATAT---------------------AAGC-AAAGTACTAAATATACTTAAAACAAGGTAGTAATTCGCAAGATGGAGAAAATAATTGCAGTTATTATAGGGAAGTATAGAGATATCCTATTTGAAGGAGGACGGGATTCAAATCAGGGAAGGGATCCTTCTTTCTATTAATTTGATAGA-----AATTCGTTTTTCTTTTCCTGTCTCTATGATTTTGATTTTCGATGAATGAGCCTGTGGTAATGCTTTTACCTCTAT--TCT…
Nephelochloa_orientalis					AAGAACTCTATTTCAGAACTTATGAG-ACAGAATATTCTGT-TTTCTTATTTAATC-TTTACTTTA---TTTT-----TTCTATTTAAAGTGGATCAA-------TTTAGATAATGTAATTTTAGATAATGTAA-ATTT---------------------AAGC-AAACCACTAAATATACTTAAAACAAGGTAGTAATTCGCAAGATGGAGAAAATAATTGAAGTTATTATAGGGAAGTATAGAGATATCCTATTTGAAGGAGGAGGGGATTCAAATCAGGGAAGAGACCCTTCTTTCTATTAATTTGATAGA-----AATTCGTTTTTCTTTTCCTGTCTCTATGATTTTGATTTTCGATGAATCAGCCTGTGGTAATGCTTTTACCTCTAT--TCT…
Holcus_lanatus					AAGAACTCTATTTCAGAAC-TATGAG-ACAGAATATTCTGT-TTTCTTATTTACTC-TTTACTTTA------TTTTTTT--T-----AACTCGATCAA-------TTTAAATAATGTAA-TTTAGATAATGTAA-ATAT---------------------AAGC-AAAGTACTAAATATACTTAAAACAAGGTAGTAATTCCTAAGATGGAGAAAATAATTGAAGTTATTATAGGGAAGTATAGAGATATCCTATTTGAAGGAGGACGGGATTCAAATCAGGGAAGGGATCCTTCTATT--------------------AATTTGATTTTCTTTTCCTGTATCTACGATTTTGATTTTCGATGAATGAGCCTGTGGTAATGCTTTTACCTCTAT--TCT…
Poa_subgen_Stenopoa					AAGAACTCTATTTCAGAAC-TATGAG-ACAGAATACTCTGG-TTTCTTATTTACTC-TTTACTTTA---TTTTTTCTATTCTATTTAAAGTGGATCAA-------TTTAGATAATGTAATTTTAGATAATGTAA-ATTT---------------------AAGC-AAACTACTAAATATACTTAAAACAAGGTATTAATTCGCAAAATGGAGAAAATAATTGAAGTTATTATAGGGAAGTATAGAGATATCCTATTTGAAGGAGAACGGGATTCAAATCAGGGAAGAGATCCTTCTTTCTATTAATTTGATAGA-----AATTCGTTTTTCTTTTCCTGTCTCTATGATTTTGATTTTCGATGAATGAGCCTGTGATAATGCTTTTACCTCTAT--TCT…
Festuca_ovina					AAGAACTCTATTTCAGAAC-TATGAG-AGAGAATATTCTGT-TTTCTTATTTACTC-TTTTCTTTA---CTTTATTTTTTTATTTTAAAGTGGATCAA-------TTTAGATAATGTAATTTTAGATAATGTAA-ATTT---------------------AAGC-AAAGTACTAAATATACTTAAAACAAGGTAGTAATTCGCAAGATGGATAAAATAATTGCAGTTATTATAGGGAAGTATAGAGATATCCTATTTGAAGTAGGACGGGATTCAAATCAGAGAAGGGGTCCTTCTTTCTATTAATTTGATAGA-----AATTCGTTTTTCTTTTCCTGTCTCTATTATTTTGATTTTCGATGAATGAGCCTGTGGTAATGCTTTTCCCTCTAT--TCT…
Desmazeria_sicula					AAGAACTCTATTTTAGAAC-TATGAGTAGAGAATATTCTGT-TTTCTTATTTACTC-TTTACTTTGA--TTTTTTTTATTTAAAGTAAAGTGGATCAA-------TTTAGATAATGTAA-TTTATCTAATGTAAAATAT---------------------AAGC-AAAGTACTAAATATACTTAAAACAAGGTAGTAATTCGCAAGATGGATAAAATAATTGCAATTATTATAGGGAAGTAGAGAGATATCCTATTTGAAGGAGGACGGGATTCAAATCATGGAAGGGATCCTTCTTTCTATTAA--------------------------------------------TTTGATTTTCGATGAATGAGCCTGTGGTAATGCTTTTACCTCTATTCTCT…
Catapodium_rigidum					AAGAACTCTATTTTAGAAC-TATGAG-AGAGAATATTCTGT-TTTCTTATTTACTC-TTTACTTTAGATTTTTTTTTATTTAAAGTAAAGTGGATCAA-------TTTAGATAATGTAA-TTTATCTAATGTAA-ATAT---------------------AAGC-AAAGTACTAAATATACTTAAAACAAGGTAGTAATTCGCAAGATGGATAAAATAATTGCAGTTATTATAGGGAAGTATAGAGATATCCTATTTGAAGGAGGACGGGATTCAAATCATGGAAGGGATCCTTCTTTCTATTAA--------------------------------------------TTTGATTTTCGATGAATGAGCCTGTGGTAATGCTTTTACCTCTAT--TCT…
Catapodium_marinum					AAGAACTCTATTTTAGAAC-TATGAG-AGAGAATATTCTGT-TTTCTTATTTACTC-TTTACTTTAGATTTTTTTTTATTTAAAGTAAAGTGGATCAA-------TTTAGATAATGTAA-TTTATCTAATGTAA-ATAT---------------------AAGC-AAAGTACTAAATATACTTAAAACAAGGTAGTAATTCGCAAGATGGATAAAATAATTGCAGTTATTATAGGGAAGTATAGAGATATCCTATTTGAAGGAGGACGGGATTCAAATCATGGAAGGGATCCTTCTTTCTATTAA--------------------------------------------TTTGATTTTCGATGAATGAGCCTGTGGTAATGCTTTTACCTCTAT--TCT…
Castellia_tuberculosa					AAGAACTCTATTTCAGAAC-TATGAG-AGAGAATATTCTGT-TTTCTTATTTACTC-TTTACTTTA---TTTTTTTTTT--------AAGTGGATCAA-------TTTAGATAATCTAA-TTTAGATAATGTAA-ATAT---------------------AAGC-AAAGTACTAAATATACTTAAAACAAGGTAGTAATTCGCAAGATGGATAAAATAATTGCAGTTATTATAGGGAAGTATAGAGATATCCTATTTGAAGGAGGACGGGATTCAAATCAGAGAAGGGGTCCTTCTTTCTATTAATTTGATAGA-----AATTCGTTTTTCTTTTCCTGTCTCTATTATTTTGATTTTCGATGAATGAGCCTGTGGTAATGCTTTTACCTCTAT--TCT…
Ammochloa_palestina		406 (Deletion)	55743	56148	AGA------------------------------------------------------------------------------------------------------------------------------------------------------------------------------------------------------------------------------------------------------------------------------------------------------------------------------------------------------------------------------------------------------------…
Alopecurus_arundinaceus					AAGAACTCTATTTCAGAAC-TATGAG-ACAGAATATTCTGT-TTTCTTATTTACTC-TTTACTTTA---TTTT-----TTCTATTTAAAGTGGATCAA-------TTTAGATAATGTAATTTTAGATAATGTAA-ATTT---------------------AAGC-AAACTACTAAATATACTTAAAACAAGGTAGTAATTGGCAAGATGGAGAAAATAATTGAAGTTATTATAGGGAAGTATAGAGAAATCCTATTTGAAGGAGGAGGGGATTCAAATCAGGGAAGAGATCCTTCTTTCTATTAATTTGATAGA-----AATTCGTTTTTATTTTCCTGTCTCTATTATTTTGATTTTCGATGAATGAGCCTGTGGTAATTCTTTTACCTCTAT--TCT…
Poa_palustris					AAGAACTCTATTTCAGAAC-TATGAG-ACAGAATACTCTGG-TTTCTTATTTACTC-TTTACTTTA---TTTTTTCTATTCTATTTAAAGTGGATCAA-------TTTAGATAATGTAATTTTAGATAATGTAA-ATTT---------------------AAGC-AAACTACTAAATATACTTAAAACAAGGTATTAATTCGCAAAATGGAGAAAATAATTGAAGTTATTATAGGGAAGTATAGAGATATCCTATTTGAAGGAGGACGGGATTCAAATCAGGGAAGAGATCCTTCTTTCTATTAATTTGATAGA-----AATTCGTTTTTCTTTTCCTGTCTCTATGATTTTGATTTTCGATCAATGAGCCTGTGATAATGCTTTTACCTCTAT--TCT…
Festuca_ovina_NC_019649					AAGAACTCTATTTCAGAAC-TATGAG-AGAGAATATTCTGT-TTTCTTATTTACTC-TTTTCTTTA---CTTTATTTTTTTATTTTAAAGTGGATCAATTTAGATTTTAGATAATGTAA-TTTAGATAATGTAA-ATAT---------------------AAGC-AAAGTACTAAATATACTTAAAACAAGGTAGTAATTCGCAAGATGGATAAAATAATTGCAGTTATTATAGGGAAGTATAGAGATATCCTATTTGAAGTAGGACGGGATTCAAATCAGAGAAGGGGTCCTTCTTTCTATTAATTTGATAGA-----AATTCGTTTTTCTTTTCCTGTCTCTATTATTTTGATTTTCGATGAATGAGCCTGTGGTAATGCTTTTCCCTCTAT--TCT…
Festuca_altissima					AAGAACTCTATTTCAGAAC-TATGAG-AGAGAATATTCTGT-TTTCTTATTTACTC-TTTACTTTA------TTTTTTC--TATTTAAAGTGGATCAA-------TTTAGATAATGTAA-TTTAGATAATCTAA-ATAT---------------------AATCTAAAGTACTAAATATACTTAAAACAAGGTAGTAATTCGCAAGATGGATAAAATAATTGCAGTTATTATAGGGAAGTATAGAGATATCCTATTTGAAGGAGGACGGGATTCAAATCAGAGAAGGGATCCTTCTTTCTATTAATTTGATAGA-----AATTCGTTTTTCTTTTCCTGTCTCTATGATTTTGATTTTCGATGAATGAGCCTGTGGTAATGCTTTTACCTCTAT--TCT…
Festuca_arundinacea					AAGAACTCTATTTCAGAAC-TATGAG-AGAGAATATTCTGTATTTCTTATTTCCTC-TTTACTTTA----TTTTTTTTC--TATTTAAAGTGGATCAA-------TTTAGATAATGTAA-GTTAGATAATTTAA-CTAT---------------------AAGCTAAAGTACTAAATATACTTAAAACAAGGTAGTAATTTGCAAGATGGATAAAATAATTGCAGTTATTATAGGGAAGTATAGAGATATCCTATTTAAAGGAGGACGGGATTCAAATCAGAGAAGGTATCCTTCTTTCTATTAATTTGATAGA-----AATTTGTTTTTCTTTTCCTGTCTCTATGATTTTGATTTTCGATGAATGAGCCTGTGGTAATGCTTTTACCTCTAT--TCT…
Festuca_pratensis					AAGAACTCTATTTCAGAAC-TATGAG-AGAGAATATTCTGTATTTCTTATTTCCTC-TTTACTTTA---TTTTTTTTTC--TATTTAAAGTGGATCAA-------TTTAGATAATGTAA-GTTAGATAATTTAA-CTAT---------------------AAGCTAAAGTACTAAATATACTTAAAACAAGGTAGTAATTTGCAAGATGGATAAAATAATTGCAGTTATTATAGGGAAGTATAGAGATATCCTATTTAAAGGAGGACGGGATTCAAATCAGAGAAGGTATCCTTCTTTCTATTAATTTGATAGA-----AATTTGTTTTTCTTTTCCTGTCTCTATGATTTTGATTTTCGATGAATGAGCCTGTGGTAATGCTTTTATCTCTAT--TCT…
Lolium_multiflorum					AAGAACTCTATTTCAGAAC-TATGAG-AGAGAATATTCTGTATTTCTTATTTCCTC-TTTACTTTA----TTTTTTTTC--TATTTAAAGTGGATCAA-------TTTAGATAATGTAA-GTTAGATAATTTAA-CTATAAGCTAAAGTACTAAATATACAAGCTAAAGTACTAAATATACTTAAAACAAGGTAGTAATTTGCAAGATGGATAAAATAATTGCAGTTATTATAGGGAAGTATAGAGATATCCTATTTAAAGGAGGACGGGATTCAAATCAGAGAAGGTATCCTTCTTTCTATTAATTTGATAGA-----AATTTGTTTTTCTTTTCCTGTCTCTATGATTTTGATTTTCGATGAATGAGCCTGTGGTAATGCTTTTATCTCTAT--TCT…
Lolium_perenne					AAGAACTCTATTTCAGAAC-TATGAG-AGAGAATATTCTGTATTTCTTATTTCCTC-TTTACTTTC----TTTTTTTTC--TATTTAAAGTGGATCAA-------TTTAGATAATGTAA-GTTAGATAATTTAA-CTAT---------------------AAGCTAAAGTACTAAATATACTTAAAACAAGGTAGTAATTTGCAAGATGGATAAAATAATTGCAGTTATTATAGGGAAGTATAGAGATATCCTATTTAAAGGAGGACGGGATTCAAATCAGAGAAGGTATCCTTCTTTCTATTAATTTGATAGA-----AATTTGTTTTTCTTTTCCTGTCTCTATGATTTTGATTTTCGATGAATGAGCCTGTGGTAATGCTTTTATCTCTAT--TCT…
Deschampsia_antarctica					AAGAACTCTATTTCAGAAC-TATGAG-AGAGAATATAGAGAATATTCCGTTTTCTTATTTACTTTA------TTTTTTC--TATTTAAAGTGGATCAA-------TTTAGATAATGTAA-TTTAGATAATGTAA-ATAT---------------------AAGC-AAAGTACTAAATATACTTAAAACAAGGTAGTAATTCGCAAGATGGAGAAAATAATTGCAGTTATTATAGGGAAGTATAGAGATATCCTATTTGAAGGAGGATGGGATTCCAATCAGGGAAGGGGTTTTTCTTTCTATTAATTTGATAGA-----AATTCGTTTTTCTTTTCCTGTCTCTATGATTTTGATTTTCGATGAATGAGCCTGTGGTAATGCTTTTACCTCTAT--TCT…
Puccinellia_nuttalliana					AAGAACTCTATTTCAGAAC-TATGAG-ATAGAATATTCTGT-TTTCTTATTT--------------------------------TTAAAGTGGATCCA-------TTTAGATAATGTAA-TTTAGATAATGTAA-ATAT---------------------AAGC-AAACTACTAAATATACTTAAAACAAGGTAGTAATTCGCAAGATGGAGAAAATAATTGAAGTTATTATAGGGAAGTATATAGATATCCTATTTGAAGGAGCACGGTATTCAAATCAGGGAAGAGATCCTTCTTTCTATTAATTTGATAGA-----AATTCGTTTTTATTTTCCTGTCTCTGTGATTTTGATTTTCGATGAATGAGCCTGTGGTAATGCTTTTACCTCTAT--TCT…
Dactylis_glomerata					AAGAACTCTATTTCAGAAC-TATGAG-AGAGAATATTCTATTTTATTAATTTACTC-TTTACTTTA---TTTTTTTTTC--TATTTAAAGTGGATCAA-------TTTAGATAATGTAA-TTTAGATAATCTAA-ATAT---------------------AAGC-AAAGTACTAAATATACTTAAAAGAAGGCAGTAATTCGCAAGATGGAGAAAATAATTGCAGTTATTATAGGGAAGTCTAGATATATCCTATTTGAAGGAGGACGGGATTCAAATCAGGGAAGGAATCCTTCTTTCTATTAATTTGATAGAAATTCAATTCGTTTTTCTTTTCCTATCTCTATGATTTTGATTCTCGATGAATGAGCCTGTGGTAATGCTTTTACCTCTAT--TCT…
Kengyilia_melanthera					AAGAACTCTATTTCAGAAC-TATGAG-ACAGAATATTCTGT-TTTCTTATTTACTC-TTTACTTTA--------TTTTTTCTATTTAAAGTGGATCAA-------TTTACATAATGTATCTATAAA--------------------------------------CAAAGTAATAAATATACTTAAAACAAAGTAGGAATTCGCAAAATGGATAAAATCATTGCAGTTATTATAGGGAAGTCTAGAGATATCCTATTTGAAGGAAGACGGGATTCAAATCAGGGAAAGGATCCTTTCTTCTATTGATTTGATAGA-----AATTCGTTTTTCTTTTCCTGTCTGTATGATTTTGATTTTCGATGAATGAGCCTTTGGTAATGCTTTTATCTCTATTCTAT…
Helictochloa_hookeri					AAGAACTCTATTTCAGAACTC-TGAG-ACAGAATATTATGTTTTCTTAATTTACTC-TTTACTTTA--------TTTTTTCTATTCAAAGTGGATCAATTTAGA-TTTAGATAATGTAA-TTTACATAATGT-AAATATAAGC----------------------AAAGTACTAAATATACTTAAAATAAGGTAGTAATTCGCAAGATGGAGAAAATAATTGCAGTTATTATAGGGAAGTCTAAAAATATCCTATTTGAAGGAGGACGGGATTCAAATCAGGGAAGGGATCCTTCTTTCTATTAATTTGATAGA-----AATTCGTTTTTCTTTTCCTGTCTCTATGATTTTGATTTTCGATGAATGAGCCTGTGGTAATGCTTTTACCTCTAT--T--…
Lamarckia_aurea	27				CTT------------------------------------------------------------TTA
Ventenata_macra					CTT------------------------------------------------------------TTG
Scolochloa_festuaceae					CTT------------------------------------------------------------TTG
Nephelochloa_orientalis					CTT------------------------------------------------------------TTG
Holcus_lanatus					CTT------------------------------------------------------------TTG
Poa_subgen_Stenopoa					CTT------------------------------------------------------------TTG
Festuca_ovina					CTT------------------------------------------------------------TTG
Desmazeria_sicula		60 (Insert)	59462	59521	CTTTATTAATTAATATAATTTAATATTGAATAAGGGATATTATGGAATGTGTAAAAGGAGCAGTTG
Catapodium_rigidum		60 (Insert)	59462	59521	CTTTATTAATTAATATAATTTAATATTGAATAAGGGATATTATGGAATGTGTAAAAGAAGCAGTTG
Catapodium_marinum		60 (Insert)	59462	59521	CTTTATTAATTAATATAATTTAATATTGAATAAGGGATATTATGGAATGTGTAAAAGAAGCAGTTG
Castellia_tuberculosa					CTT------------------------------------------------------------TTG
Ammochloa_palestina					CTT------------------------------------------------------------TTG
Alopecurus_arundinaceus					CTT------------------------------------------------------------TTG
Poa_palustris					CTT------------------------------------------------------------TTG
Festuca_ovina_NC_019649					CTT------------------------------------------------------------TTG
Festuca_altissima					CTT------------------------------------------------------------TTG
Festuca_arundinacea					CTT------------------------------------------------------------TTG
Festuca_pratensis					CTT------------------------------------------------------------TTG
Lolium_multiflorum					CTT------------------------------------------------------------TTG
Lolium_perenne					CTT------------------------------------------------------------TTG
Deschampsia_antarctica					CTT------------------------------------------------------------TTG
Puccinellia_nuttalliana					CTT------------------------------------------------------------TTG
Dactylis_glomerata					CTT------------------------------------------------------------TTG
Kengyilia_melanthera					CTTTTGTG----------------------------------------------------------
Helictochloa_hookeri					CTTT--------------------------------------------------------------
Lamarckia_aurea	28				TAC----------------------------------------------------------AAA
Ventenata_macra					TAC----------------------------------------------------------AAA
Scolochloa_festuaceae					TAC----------------------------------------------------------AAA
Nephelochloa_orientalis					TAC----------------------------------------------------------AAA
Holcus_lanatus					TAC----------------------------------------------------------AAA
Poa_subgen_Stenopoa					TAC----------------------------------------------------------AAA
Festuca_ovina					TAC----------------------------------------------------------AAA
Desmazeria_sicula					TAC----------------------------------------------------------AAA
Catapodium_rigidum					TAC----------------------------------------------------------AAA
Catapodium_marinum					TAC----------------------------------------------------------AAA
Castellia_tuberculosa					TAC----------------------------------------------------------AAA
Ammochloa_palestina					TAC----------------------------------------------------------AAA
Alopecurus_arundinaceus					TAC----------------------------------------------------------AAA
Poa_palustris					TAC----------------------------------------------------------AAA
Festuca_ovina_NC_019649					TAC----------------------------------------------------------AAA
Festuca_altissima					TAC----------------------------------------------------------AAA
Festuca_arundinacea					TAC----------------------------------------------------------AAA
Festuca_pratensis					TAC----------------------------------------------------------AAA
Lolium_multiflorum					TAC----------------------------------------------------------AAA
Lolium_perenne					TAC----------------------------------------------------------AAA
Deschampsia_antarctica			59583	59640	TACAAAATATATACTGAGGATCTGTGCCTACTCTACTTTCCTATCTAGGACTTCGATATACAAA
Puccinellia_nuttalliana					TAC----------------------------------------------------------AAA
Dactylis_glomerata					TAC----------------------------------------------------------AAA
Kengyilia_melanthera					---------------GAGGATCTGTGCCTACTCTACTTTCCTATCTAGGACTTCGATATACAAA
Helictochloa_hookeri					-----------TGTGGAGGATCTGTGCCTACTCTACTTTCCTATCTAGGACTTCGATATACAAA
Lamarckia_aurea	29	999	61975	62973	TTGGGAAAGAATCAATATACTTTTAATGTCGAATCGGGATTCACTAAGACAGAAATAAAGCATTGGGTCGAACCTCTTCTTTGGTGTTAAGGTAGTAGCTGTGAATAGCCATCGACTACCTGGAAAGGGTAGAAGAATAGGACCTATTCTGGGACATACAATGCATTACAGACGTATGATCATTACCCTTCAACCGGGTTATTCTATTCCACTTTTAGATAGAG---AAAAAACTAACGGAGAATGAATGAAAAAAGAC----ATAGTTTGGA------------------------------------------------------------------------------------------------------------------------------…
Ventenata_macra					TTGGGAAAGAATCAATATACTTTTAATGTCGAATCGGGATTCACTAAGACAGAAATAAAGCATTGGGTCGAA-CTCTTCTTTGGTGTTAAGGTAGTAGCTGTGAATAGCCATCGACTACCCGGAAAGGGTAGAAGAATAGGACCTATTCTGGGACATACAATGCATTACAGACGTATGATCATTACCCTTCAACCGGGTTATTCTATTCCACTTCTAGATAGAG--AAAAAAACTAAAGGAGAATGAATGAAAAAAGAC----ATAGTTTGGAAGTTAGACCCTTTT------ATTTTATAAGACTCTCTTGCAAAAAAGAGGGCGTTTGAAACTTTTAACAAGTGTAATCGTGAGTCAACAAGTGACTCGAACTGTGTGTAAGAAAATAAGCATTTTT…
Scolochloa_festuaceae					TTGGGAAAGAATCAATATACTTTTAATGTCGAATCGGGATTCACTAAGACAGAAATAAAGCATTGGGTCGAA-CTCTTCTTTGGTGTTAAGGTAGTAGCTGTGAATAGCCATCGACTACCTGGAAAGGGTAGAAGAATAGGACCTATTCTGGGACATACAATGCATTACAGACGTATGATCATTACCCTTCAACCGGGTTATTCTATTCCACTTTTAGATAGAG---AAAAAACTAACGGAGAATGAATGAAAAAAGAC----ATAGTTTGGA------------------------------------------------------------------------------------------------------------------------------…
Nephelochloa_orientalis					TTGGGAAAGAATCAATATAC-------------------------------------------------------------------------------------------------------------------------------------------------------------------------------------------------------------------------------------------------------------------------------------------------------------------------------------------------------------------------------------------…
Holcus_lanatus					TTGGGAAAGAATCAATATACTTTTAATGTCGAATCGGGATTCACTAAGACAGAAATAAAGCATTGGGTCGAA-CTCTTCTTTGGTGTTAAGGTAGTAGCTGTGAATAGCCATCGACTACCCGGAAAGGGTAGAAGAATAGGACCTATTCTGGGACATACAATGCATTACAGACGTATGATCATTACCCTTTAACCGGGTTATTCTATTCCACTTCTAGATAGAG---AAAAAAATAATGGAGAATGAATGAAAAAAGAC----ATAGTTTGGA------------------------------------------------------------------------------------------------------------------------------…
Poa_subgen_Stenopoa					TTGGGAAAGAATCAATATACTTTTACTGTCGAATCGGGATTCACTAAGACAGAAATAAAGCGTTGGGTCGAA-CTCTTCTTTGGTGTTAAGGTAGTAGCTGTGAATGGCCATCGACTACCCGGAAAGGGTAGAAGAATAGGACCTATTCTGGGACATACAATGCATTACAGACGTATGATCATTACCCTTCAACCGGGTTATTCTATTCCACTTCTAGATAGAG--AAAAAAACTAAAGGAGAATGAATGAAAAAAGAC----ATAGTTTGGAAGTTAGACCCTTTT------ATTTTATAAGACTCTCTTGCAAAAAAGAGGGCGTTTGAAACTTTTAACAAGTGTAATCGTGAGTCAACAAGTGACTCGAACTGTGTGTAAGAAAATAAGCA--TTT…
Festuca_ovina					TTG---------------------------------------------------------------------------------------------------------------------------------------------------------------------------------------------------------------GATTATTGGAAGAG---AAAGAACTAACGGAGCATGAATGAAAAAAGAC----ATAGTTTGGA------------------------------------------------------------------------------------------------------------------------------…
Desmazeria_sicula					TTGGGAAAGAATCAATATACTTTTAATGTCGAATCGGGATTCACTAAGACAGAAATAAAGCATTGGGTCGAA-CTCTTCTTTGGTGTTAAGGTAGTAGCTGTGAATAGCCATCGACTACCTGGAAAGGGTAGAAGAATAGGACCTATTCTGGGACATACAATGCATTACAGACGTATGATCATTACCCCTCAACCGGGTTATTCTATTCCACTTCTAGATAGAG--AAAAAAACTAACGAAGAATTAATGAAAAAAGAC----ATAGTTTGGA------------------------------------------------------------------------------------------------------------------------------…
Catapodium_rigidum					TTGGGAAAGAATCAATATACTTTTAATGTCGAATCGGGATTCACTAAGACAGAAATAAAGCATTGGGTCGAA-CTCTTCTTTGGTGTTAAGGTAGTAGCTGTGAATAGCCATCGACTACCTGGAAAGGGTAGAAGAATAGGACCTATTCTGGGACATACAATGCATCACAGACGTATGATCATTACCCTTCCACCGGGTTATTCTATTCCACTTCTAGATAGAGAAAAAAAAACTAACGAAGAATTAATGAAAAAAGAC----ATAGTTTGGA------------------------------------------------------------------------------------------------------------------------------…
Catapodium_marinum					TTGGGAAAGAATCAATATACTTTTAATGTCGAATCGGGATTCACTAAGACAGAAATAAAGCATTGGGTCGAA-CTCTTCTTTGGTGTTAAGGTAGTAGCTGTGAATAGCCATCGACTACCTGGAAAGGGTAGAAGAATAGGACCTATTCTGGGACATACAATGCATTACAGACGTATGATCATTACCCTTCAACCGGGTTATTCTATTCCACTTCTAGATAGAGAAAAAAAAACTAACGAAGAATTAATGAAAAAAGAC----ATAGTTTGGA------------------------------------------------------------------------------------------------------------------------------…
Castellia_tuberculosa					TTG---------------------------------------------------------------------------------------------------------------------------------------------------------------------------------------------------------------GATTATTGGAAGAG---AAAAAACTAACGGAGCATGAATGAAAAAAAAC----ATAGTTTGGA------------------------------------------------------------------------------------------------------------------------------…
Ammochloa_palestina					TTGGGAAAGAATCAATACACTTTTAATGTCGAATCGGGATTCACTAAGACAGAAATAAAGCATTGGGTCGAA-CTCTTCTTTGGTGTTAAGGTAGTAGCTGTGAATAGCCATCGACTACCTGGAAAGAGTAGAAGAATAGGACCTATTCTGGGACATACAATGCATTACAGACGTATGATCATTACCCTTCAACCGGGTTATTCTATTCCACTTCTAGATAGAG---AAAAAACTAACGGAGAATGAATGAAAAAAGAC----ATAGTTTGGA------------------------------------------------------------------------------------------------------------------------------…
Alopecurus_arundinaceus					TTGGGAAAGAATCAATATACTTTTAATGTCGAATCGAGATTCACTAAGAGAGAAATAAAACATTGGGTCGAA-CTCTTCTTTGGTGTTAAGGTAATAGCTGTGAATAGCCATCGACTACCTGGAAAGGGTAGAAGAATAGGACCTATTCTGGGACATACAATGCATTACAGACGTATGATCATTACTCTTCAACCGGGTTATTCTATTCCACTTCTAGATAGAG--AAAAAAACTAAAGGAGAATGAATGAAAAAAGAC----ATAGTTTGGAAGTTAGACCCTTTTATTTTAATTTTATAAGACTCTCTTGTAAAAAAGAGGGCGTTTGAAACTTTTAACAAGTGTAATCGTGAGTCAACAAGTGACTCGAACTGTGTGTAAGAAAATAAGCA--TTT…
Poa_palustris					TTGGGAAAGAATCAATATACTTTTGTT----------------------------------------------------------------------------------------------------------------------------------------------------------------------------------------------------------------------------------------------------------------CCTA------ATTTTTTCGGACC------------------------AAACCTCTGAC---------------CCAACAATAGAAT------------------------------…
Festuca_ovina_NC_019649					TTG---------------------------------------------------------------------------------------------------------------------------------------------------------------------------------------------------------------GATTATTGGAAGAG---AAAGAACTAACGGAGCATGAATGAAAAAAGAC----ATAGTTTGGA------------------------------------------------------------------------------------------------------------------------------…
Festuca_altissima					TTG----------------------------------------------------------------------------------------------------------------------------------------------------------------------------------------------------------------------------G---AAAAAACTAACGGAGAATGAATGAAAAAAGAT----ATAGTTTGGA------------------------------------------------------------------------------------------------------------------------------…
Festuca_arundinacea					TTG----------------------------------------------------------------------------------------------------------------------------------------------------------------------------------------------------------------------------G---AAAAAACTAATGGAGAATTAATGAAAAAAGAC----ATAGTTTGAA------------------------------------------------------------------------------------------------------------------------------…
Festuca_pratensis					TTG----------------------------------------------------------------------------------------------------------------------------------------------------------------------------------------------------------------------------G---AAAAAACTAATGGAGAATTAATGAAAAAAGAC----ATAGTTTGAA------------------------------------------------------------------------------------------------------------------------------…
Lolium_multiflorum					TTG----------------------------------------------------------------------------------------------------------------------------------------------------------------------------------------------------------------------------G---AAAAAACTAATGGAGAATTAATGAAAAAAGAC----ATAGTTTGAG------------------------------------------------------------------------------------------------------------------------------…
Lolium_perenne					TTG----------------------------------------------------------------------------------------------------------------------------------------------------------------------------------------------------------------------------G---AAAAAACTAATGGAGAATTAATGAAAAAAGAC----ATAGTTTGAG------------------------------------------------------------------------------------------------------------------------------…
Deschampsia_antarctica					TTGGGAAAGAATCAATATACTTTTAATGTCGAATCGGGATTCACTAAGACAGAAATAAAGCATTGGGTCGAA-CTCTTCTTTGGTGTTAAGGTAGTAGCTGTGAATAGCCATCGACTACCCGGAAAGGGTAGAAGAATAGGACCTATTCTGGGACATACAATGCATTACAGACGTATGATCATTACCCTTCAACCAGGTTATTCTATTCCACTTCTAGATAGAG--AAAAAAACTAACGGAGAATGAATGAAAAAAGATATAGATAGTTTGGA------------------------------------------------------------------------------------------------------------------------------…
Puccinellia_nuttalliana					TTGGGAAAGAATCAATATACTTTTAATGTCGA---------------------------------------------------------------------------------------------------------------------------------------------------------------------------------------------------------------------------------------ATAACCTGGA------------------------------------------------------------------------------------------------------------------------------…
Dactylis_glomerata					TTGG---------------------------------------------------------------------------------------------------------------------------------------------------------------------------------------------------------------------------G---AAAAAACTAACGGAGAATGAATGAAAAAAGAC----ATAGTTTGGA------------------------------------------------------------------------------------------------------------------------------…
Kengyilia_melanthera					---------------------------------------------------------------------------------------------------------------------------------------------------------------------------------------------------------------------------------------------------------------------------------------------------------------------------------------------------------------------------------------------------------------…
Helictochloa_hookeri					---------------------------------------------------------------------------------------------------------------------------------------------------------------------------------------------------------------------------------------------------------------------------------------------------------------------------------------------------------------------------------------------------------------…
Lamarckia_aurea	30				TTTTTACAAAATATTTTTTATGGAATACTTTAGTATTCCATAAAAAATATTAATTTT
Ventenata_macra					TTTTTACAAAATATTT---------------------------------TTTATTTT
Scolochloa_festuaceae					TTTTTACAAAATATTTTTTATAGAATACTAAAGTATTCTATAAAAAATATTTATTTT
Nephelochloa_orientalis					TTTTTACAAAATATTTTTTATCGAATACTAAAGTATTCGATAAAAAATATTTATTTT
Holcus_lanatus					TTTTTACAAAATATTTTTTATAGAATACTTTAGTATTCTATAAAAAATATTTATTTT
Poa_subgen_Stenopoa					TTTTTACAAAATATTTTTTATAGAATACTTTAGTATTCTATAAAAAATATTTATTTT
Festuca_ovina					TTTTTACAAAATATTTTTTAT---------------------------------TTT
Desmazeria_sicula		51 (Deletion)	63246	63296	TTT---------------------------------------------------TGC
Catapodium_rigidum		51 (Deletion)	63246	63296	TTT---------------------------------------------------TTT
Catapodium_marinum		51 (Deletion)	63246	63296	TTT---------------------------------------------------TTT
Castellia_tuberculosa					TTTTTACAAAATATTTTTTAT---------------------------------TTT
Ammochloa_palestina					TTTTTACAAAAGATTTTTTATAGAATACTTTAGTATTCTATAAAAAATTTAAATTTT
Alopecurus_arundinaceus					TTTTTACAAAATATTTTTTATAGAATACTAAAGTATTCTATAAAAAATATTTATTTT
Poa_palustris					TTTTTACAAAATATTTTTTATAGAATACTAAAGTATTCTATAAAAAATATTTATTTT
Festuca_ovina_NC_019649					TTTTTACAAAATATTTTTTAT---------------------------------TTT
Festuca_altissima					TTTTTACAAAATATTTTTTATAGAATACTAAAGTATTCTATAAAAAATATTTATTTT
Festuca_arundinacea					TTTTTAGAAAATATTTTTTATAGAATACTAAAGTATTCTATAAAAAATATTTTGTTT
Festuca_pratensis					TTTTTAGAAAATATTTTTTATAGAATACTAAAGTATTCTATAAAAAATATTTTGTTT
Lolium_multiflorum					TTTTTACAAAATATTTTTTATAGAATACTAAAGTATTCTATAAAAAATATTTATTTT
Lolium_perenne					TTTTTAGAAAATATTTTTTATAGAATACTAAAGTATTCTATAAAAAATATTTTGTTT
Deschampsia_antarctica					TTTTTACAAAATATTTTTTATAGAATACTTTAGTATTCTATAAAAAATATTTATTTT
Puccinellia_nuttalliana					TTTTTACAAAATATTT------------------------------------ATTTT
Dactylis_glomerata					TTTTTACAAAATATTTTTTATGGAATACTTTAGTATTCCATAAAAAATATTAATTTT
Kengyilia_melanthera					TTTTTACAGAATATTTTTCAAA-----------------------------------
Helictochloa_hookeri					TTTTTACAAAATATTTTTTATAGAATACTAAAGTATTCTATAAAAAATATTTATTTT
Lamarckia_aurea	31				AAATTATTTTTAAT----------TTATTTTGTCCAAG-------TGAGATATATCCCGT----ACTATTCTTCCATTTTCATCCGAAAGGTC--TTTTTTTTTATTCTATTTCACTATTCCA------------CTCTAAG------AAA
Ventenata_macra		93 (Deletion)	64683	64775	AAT---------------------------------------------------------------------------------------------TTTTTTTTATTCTATTTCACTATTCCA--CTCCATCTAGATCTAAGAAAGAAAAA
Scolochloa_festuaceae					AAATTGTTTTTAAT----------TTATTTTGTCCAAG-------TGAGATATATCCCAT----ACTATTCTTCCATTTTGATTCGAAAGGTCTTTTTTTTTTTATTCTATTTCACTATTCCA--CTCCATCTAGATCTAAG------AAA
Nephelochloa_orientalis					AAATTTTTTTTAAT----------TTATTTTGTCCAAG-------TGAGATATATCCCAT----ACTATTCTTCCATTTTAATCCGAAAGGTC--TTTTTTTTTATTCTATTTCACTATTCCA--CTCCATCTAGATCTAAGAAAGAAAAA
Holcus_lanatus					AAATTGTTTTTAAT----------TTTTTTTGTCCAAG-------TGAGATATAATATATCCCAACTATTCTTCCATTTTCATCCGAAAGGTC--TTTTTTTTTATTCTATTTCACTATTCCA--CTCCATCTAGATCTAAG------AAA
Poa_subgen_Stenopoa					AAATTGTTTTTAAT----------TTATTTTGTCCAAG-------TGAGATATATCCCAT----ACTATTCTTCCATTTTCATCCGAAAGGTC-TTTTTTTTTTATTCTATTTCACTATTCCA--CTCCATCTAGATTTAAG------AAA
Festuca_ovina					AAATTGTTTTTCAT----------TTATTTTGTCCAAG-------TTAGATATATCCCAT----------ACTCAATTTTCATCCAAAAGGTC---TTTTTTTTATTCTATTTCACTATTCCACTCTCCATCTAGATCTAAG------AAA
Desmazeria_sicula		145 (Deletion)	64683	64827	AAG-------------------------------------------------------------------------------------------------------------------------------------------------AAA
Catapodium_rigidum		145 (Deletion)	64683	64827	AAG-------------------------------------------------------------------------------------------------------------------------------------------------AAA
Catapodium_marinum		145 (Deletion)	64683	64827	AAG-------------------------------------------------------------------------------------------------------------------------------------------------AAA
Castellia_tuberculosa					AAATTGTTTTTAAT----------TTATTTTGTCCAAGTTAGATATTAGATATATCCCAT----------ACTC-ATTTTCATCCAAAAGGTC--TTTTTTTTTATTCTATTTCACTATTCCA--CTCCATCTAGATCTGAG------AAA
Ammochloa_palestina					AATTTTTTTTTAAT----------TTATTTTGTCCAAG-------TGAGATATATCCCAT----ACTATTCTTCCATTTTCATCCGAAAGGTC-TTTTTTTTTTATTCTATTTCACTATTCTA------------CTCTAAG------AAA
Alopecurus_arundinaceus					AAATTGTTTTTAAT----------TTTTTTTGTCCAAG-------TGAGATATATCCCA----------TCTTCCATTTTAATCCTAAAGGTC---TTTTTTTTATTCTATTTCACTATTCCA--CTCCATCTAGATCTAAG------AAA
Poa_palustris					AAATTGTTTTTAAT----------TTATTTTGTCCAAG-------TGAGATATATCCCAT----ACTATTCTTCCATTTTCATCCGAAAGGTC-TTTTTTTTTTATTCTATTTCACTATTCCA--CTCCATCTAGATTTAAG------AAA
Festuca_ovina_NC_019649					AAATTGTTTTTAAT----------TTATTTTGTCCAAG-------TTAGATATATCCCAT----------ACTC-ATTTTCATCCAAAAGGTC----TTTTTTTATTCTATTTCACTATTCCA--CTCCATCTAGATCTAAG------AAA
Festuca_altissima					AAATTGTTTTTAAT----------TTATTTTGTCCAAG-------TGAGATATATCCCAT----ACTATTCTTCCATTTTCATCCGAAAGGTC---TTTTTTTTATTCTATTTCACTATTCCA--CTCCATCTAGATCTAAG------AAA
Festuca_arundinacea					AAATTGTTTTTAATTTATTTTAATTTATTTTGTCGAAG-------TGAGATATATTCCAT----ACTATTCTTCCATTTTCATCCGAAAGGTC---TTTTTTTTATTCTATTTCACTATTTCA--CTCCATCTAGATCTAAG------AAA
Festuca_pratensis					AAATTGTTTTTAATTTATTTTAATTTATTTTGTCCAAG-------TGAGATATATTCCAT----ACTATTCTTCCATTTTCATCCGAAAGGTC---TTTTTTTTATTCTATTTCACTATTTCA--CTCCATCTAGATCTAAG------AAA
Lolium_multiflorum					AAATTGTTTTTAATTTATTTTAATTTATTTTGTCCAAG-------TGAGATATATTCCAT----ACTATTCTTCCATTTTCATCCGAAAGGTC---TTTTTTTTATTCTATTTCACTATTTCA--CTCCATCTAGATCTAAG------AAA
Lolium_perenne					AAATTGTTTTTAATTTATTTTAATTTATTTTGTCCAAG-------TGAGATATATTCCAT----ACTATTCTTCCATTTTCATCCGAAAGGTC---TTTTTTTTATTCTATTTCACTATTTCA--CTCCATCTAGATCTAAG------AAA
Deschampsia_antarctica					AAATTGTTTTTAAT----------TTATTTTGTCCAAG-------TGAGATATATCCCAT----ACTATTCTTCCATTTTCATCCGAAAGGTC--TTTTTTTTTATTCTATTTCACTATTCCA--CTCCATCTAGATCTAAG------AAA
Puccinellia_nuttalliana					AAATTGTTTTTAAT----------TTATTTTGTCCAAGTGAGA--TATAATATATCCCAT----ACTATTCTTCCATTTTCATCCGAAAGGTA--TTTTTTTTTATTCTATTTCACTATTTCA--CTCCATCTAGATCTAAG------AAA
Dactylis_glomerata					AAATTATTTTTAAT----------TTATTTTGTCCAAG-------TGAGATATATCCCGT----ACTATTCTTCCATTTTCATCCGAAAGGTC---TTTTTTTTATTCTATTTCACTATTCCA------------CTCTAAG------AAA
Kengyilia_melanthera					A----------AATTCCTTTTAATTTTTTTTGTCCAAG-------TGAGATATATCGCAT----ACTATTCTTCCTTTTTCATCCGAAAGGGC-----TTTTTTATTCTATTTCACTATTTCA--TTCCATCTAGATCTAAG------AAA
Helictochloa_hookeri					AAATTGT----------TTTTAATTTATTTTGTGCAAG-------TGAGATATATCCCATACTATTCTTTCTTCCATTTTCATCCGAAAGGTC---TTTTTTTTATTCTATTTCACTATTCCA--CTCCATCTAGATCTAAGAAAG-----
Lamarckia_aurea	32				TTCGTGGCATAAAATATGGGATCCCCGAGTGATCTCTTTTTCTTGTTGCTTCATAA
Ventenata_macra					TTCGTGGAATAAAATATTGGATCCTCGAGTGATCTCTTTTTCTTGTTGCTTCATAA
Scolochloa_festuaceae					TTCGTGGAATAAAATATTGGATCCTCGAGTGATCTCTTTTTCTTGTTGCTTCATAA
Nephelochloa_orientalis					TTCGTGGAATAAAATATTGGATCCTCGAGTGATCTCTTTTTCTTGTTGCTTCATAA
Holcus_lanatus					TTCGTGGAATAAAATATTGGATCCTCGAGTGATCTCTTTTTCTTGTTGCTTCATAA
Poa_subgen_Stenopoa					TTCGTGGAATAAAATATTGGATCCTCGAGTGATCTCTTTTTCTTGTTGGTTCATAA
Festuca_ovina		50 (Deletion)	67678	67727	TTC--------------------------------------------------TAA
Desmazeria_sicula					TTCGTGGAATAAAATATTGGATCCTCAAGTAATCTCTTTTTCTTGTTGCTTCATAA
Catapodium_rigidum					TTCGTGGAATAAAATATTGGATCCTCAAGTAATCTCTTTTTCTTGTTGCTTCATAA
Catapodium_marinum					TTCGTGGAATAAAATATTGGATCCTCAAGTAATCTCTTTTTCTTGTTGCTTCATAA
Castellia_tuberculosa		50 (Deletion)	67678	67727	TTC--------------------------------------------------TAA
Ammochloa_palestina					TTCGTGGCATAAAATATTGGATCCTCGAGTGATCTCTTTTTCTTGTTGCTTCATAA
Alopecurus_arundinaceus					TTCGTGGAATAAAATATTGGATCCTCGAGTGATCTCTTTTTCTTGTTGCTTCATAA
Poa_palustris					TTCGTGGAATAAAATATTGGATCCTCGAGTGATCTCTTTTTCTTGTTGGTTCATAA
Festuca_ovina_NC_019649		50 (Deletion)	67678	67727	TTC--------------------------------------------------TAA
Festuca_altissima		50 (Deletion)	67678	67727	TTC--------------------------------------------------TAA
Festuca_arundinacea		50 (Deletion)	67678	67727	TTC--------------------------------------------------TAA
Festuca_pratensis		50 (Deletion)	67678	67727	TTC--------------------------------------------------TAA
Lolium_multiflorum		50 (Deletion)	67678	67727	TTC--------------------------------------------------TAA
Lolium_perenne		50 (Deletion)	67678	67727	TTC--------------------------------------------------TAA
Deschampsia_antarctica					TTCGTGGAATAAAATATTGGATCCTCGAGTGATCTCTTTTTATTGTTGCTTCATAA
Puccinellia_nuttalliana					1---------------------------ATGATCTCTTTTTCTTGTTGCTTCATAA
Dactylis_glomerata					TTCGTGGCATAAAATATTGGATCCCCGAGTGATCTCTTTTTCTTGTTGCTTCATAA
Kengyilia_melanthera					TTCGTGGAATAAGATATTATATTGGATCCTCGAGTGATCTCTTTTTCTTGTTGCTTCATAA
Helictochloa_hookeri					TTCGTGGAATAAA-----ATATTGGATCCTCTAGTGATCTCTTTTTCTTGTTGCTTCATAA
Lamarckia_aurea	33				GCTTCGGA-ATAGTAGAATAATTA-GGAATAGCGGCCAAAATCTTGGGAAAATCTAAGTTAATGA--AATAGGTTTGGATAAAAAATT------TAGGAAGGACATTCTCATACTGCCACAATACAAGGACAAGT----------------ATATGTGAAATCTATCCTTTTTTAGTTAAAAGTTTTCTTCCA---------------------------ATCCAAATTTTTCCTTTAAAGTTAAAGAATTTCATTAGTTAGCA-------TAATATCTAATAAATAGAAA-ATA
Ventenata_macra					GCTTCGGA-ATAGTAGAATAATTT-GGAATAGCGGCCAAAATCTTGGGAAAATCTAAGTTAATGATCAATAGGTTTGGATAAAGAATT------TAGGAAGGATATTCTCATACTGACACAATACAAAGACAAGT----------------ATATGTGAAATCTATCCTTTTTTAGTTAAAAGTTTTCTTCCAATCCAGTCTTTCCCTTTTTCAAATCTAATCTAATTTTTCCCTTTAAAGTTAAAGAATTTCATTAGTTAGCA-------TAATATGTAATAAATAGAAA-ATA
Scolochloa_festuaceae					GCTTCGGA-ATAGTAGAATAATTC-GGAATAGCGGCCAAAATCTTGGGAAAATATAAGTTAATGATCAATAGGTTTGGATAAAGAATT------TAGGAAGGATATTCTCATACTGACACAATACAAGGACAAGT----------------ATATGTGAAATCTATCCTTTTTTAGTTAAAGGTTTTCTTCCA---------------------------ATCCAATTTTTCCCTTTAAAGTTAAAGAATTTCATTAGTTAGCA-------TAATATCTAATAAATAGAAA-ATA
Nephelochloa_orientalis					GCTTCGGA-ATAGTAGAATAATTC-GGAATAGCGGCCAAAATCTTGGGAAAATCTAAGTTAATGATCAATAGGTTTGGATAAAGAATT------TAGGAAGGATATTCTCATACTGACACAATACAAAGACAAGT----------------ATATGTGAAATCTATCCTTTTTTAGTTAAAAGTTTTCTTCCAATCCAGTCTTTCCCTTTTTCGAATCTAATCTAATTTTTACCTTTAAAGTTAAAGAATTTCATTAGTTAGCA-------TAATATGTAATAAATAGAAA-ATA
Holcus_lanatus					GCTTCGGA-ATAGTAGAATAATTC-GGAATAGCGGCCAAAATCTTGGGAAAATCGAAGTTAATGATCAATAGGTTTGGATAAAGAATT------TAGGAAGGATATTCTGATACTGACACAATACAAAGACAAGT----------------ATATGTGAAATCTATCCTTTTTTAGTTAAAAGTTTTCTTCCA---------------------------ATCCAATTTTTCCCTTTAAAGTTAAAGAATTTCATTAGTTAGCATAATATCTAATATCTAATAAATAGAAA-ATA
Poa_subgen_Stenopoa					GCTTTGGA-ATAGTAGAATAATTTCGAAATAGCGGAGAAAATCTTGGGAAAATCTAAGTTAATGATCAATAGGTTTGGATAAAGAATTTAGGAATAGGAAGGATATTATCATACTGACACAATACAAGGACAAGT----------------ATATGTGAAATCTATCCTTTTTTACTTAAAAGTTTTCT-----TCCAATCTTTCCCTTTTTCGA-----ATCTCATTTTTCCTTTTAAAGTTAAAGAATTTCATTAGTTAGCA-------TAATATCGAATAAATAGAAA-ATA
Festuca_ovina		157 (Deletion)	69143	69299	GCTTCGGA-ATAGTCGAATAATTC-GGAATAGCGGCCAAAATCTTGGGAAAATCTAAGTTAATGATCAATAGG------TTTGGA-------------------------------------------------------------------------------------------------------------------------------------------------------------TAAAGAATTTCATTAGTTAGCA-------TAATATCTAATAAATAAAAA-ATA
Desmazeria_sicula					GCTTCGGA-ATAGTAGAATAATTC-GGAATAGCGGCCAAAATCTTGGGAAAATCTAAGTTAATGA--AATAGGTTTGGATAAAGAATT------TAGGGAGGATATTCTCATACTGACACAATAGAAGGACAGGT----------------ATATGTGAAATCTATCCTTTTTTAGTTAAAAGTTTTCTTCCA---------------------------ATCCAATTTTTTCCTTTAAAGTTAAAGAATTTCATTAGTTAGCA-------TAATATCTAATAAATGGAAA-ATA
Catapodium_rigidum					GCTTCGGA-ATAGTAGAATAATTC-GGAATAGCGGCCAAAATATTGGGAAAATCTAAGTTAATGA--AATAGGTTTGGATAAAGAATT------TAGGGAGGATATTCTCATATTGACACAATAGAAGGACAGGT----------------ATATGTGAAATCTATCCTTTTTTAGTTAAAAGTTTTCTTCCA---------------------------ATCCAATTTTTTCCTTT----------------------------------------------------------
Catapodium_marinum					GCTTCGGA-ATAGTAGAATAATTC-GGAATAGCGGCCAAAATATTGGGAAAATCTAAGTTAATGA--AATAGGTTTGGATAAAGAATT------TAGGGAGGATATTCTCATATTGACACAATAGAAGGACAGGT----------------ATATGTGAAATCTATCCTTTTTTAGTTAAAAGTTTTCTTCCA---------------------------ATCCAATTTTTTCCTTT----------------------------------------------------------
Castellia_tuberculosa		157 (Deletion)	69143	69299	GCTTCGGA-ATAGTAGAATAATTC-GGAATAGCGGCCAAAATCTTGGGAAAATCTAAGTTAATGATCAATAGGTTTGGATTTGGA-------------------------------------------------------------------------------------------------------------------------------------------------------------TAAAGAATTTCATTAGTTAGCA-------TAATATCTAATAAATAGAAA-ATA
Ammochloa_palestina					GCTTCGGA-ATAGTAGAATAATTA-GGAATAGCGGCCAAAATCTTGAGAAAATCAAAGTTAATGA--AATAGGTTTGGATAAAAAATT------TAGGAAGGATATTCTCATACTGACACAATACAAGGCCAAGTATATGTGAAATCTAGTATATGTGAAATCTATCCTTTTTTAGTTAAAAGTTTTCTTCCA---------------------------ATCCAATTTTATTCTTTAAAGTTAAAGAATTTCATTAGTTAGCA-------TAACATCTAAT-------AA-ATA
Alopecurus_arundinaceus		289 (Deletion)	69061	69349	GCT-------------------------------------------------------------------------------------------------------------------------------------------------------------------------------------------------------------------------------------------------------------------------------------------------ATA
Poa_palustris					GCTTTGGA-ATAGTAGAAAAATTTCGAAATAGCGGACAAAATCTTGGGAAAATCTAAGTTAATGATCAATAGGTTTGGATAAAGAATTTAGGAATAGGAAGGATATTATCATACTGACACAATACAAGGACAAGT----------------ATATGTGAAATCTATCCTTTTTTACTTAAAAGTTTTCTTCCAATCCAATCTTTCCCTTTTTCGA-----ATCTAATTTTTCCTTTTAAAGTTAAAGAATTTCATTAGTTAGCA-------TAATATCGAATAAATAGAAA-ATA
Festuca_ovina_NC_019649		157 (Deletion)	69143	69299	GCTTCGGA-ATAGTCGAATAATTC-GGAATAGCGGCCAAAATCTTGGGAAAATCTAAGTTAATGATCAATAGG------TTTGGA-------------------------------------------------------------------------------------------------------------------------------------------------------------TAAAGAATTTCATTAGTTAGCA-------TAATATCTAATAAATAAAAA-ATA
Festuca_altissima					GCTTCGGA-ATAGTAGAATAATTC-GGAATAGCGGCCAAAATCTTGGGAAAATCTAAGTTAATGATCAATAGGTTTGGATAAAGAATT------TAGGAAGGATATTCTCATACTGACACAATACAAGGACAAGT----------------ATATGCGAAATCTATCCTTTTTTAGTTAAAAGTTTTCTTCCA---------------------------ATCCAATTTTTCCCTTTAAAGTTAAAGAATTTCATTAGTTAGCA-------TAATATCTAATAAATAGAAA-ATA
Festuca_arundinacea					GCTTCGGA-ATAGTAGAATAATTC-GGAATAGTGGCCAAAATCTTGGGAAAATCTAAGTTAATGATCAATAGGTTTGGATAAAGAATT------TAGGAAGGATATTCTCATACTGACACAATACAAGGACAAGT----------------ATATGCGAAATCTATCCTTTTTTAGTTAAAAGTTTTCTTCCA---------------------------ATCCAATTTTTCCCTTTAAAGTTAAAGAATTTCATTAGTTAGCA-------TAATATCTAATAAATAGAAATATA
Festuca_pratensis					GCTTCGGA-ATAGTAGAATAATTC-GGAATAGTGGCCAAAATCTTGGGAAAATCTAAGTTAATGATCAATAGGTTTGGATAAAGAATT------TAGGAAGGATATTCTCATACTGACACAATACAAGGACAAGT----------------ATATGCGAAATCTATCCTTTTTTAGTTAAAAGTTTTCTTCCA---------------------------ATCCAATTTTTCCCTTTAAAGTTAAAGAATTTCATTAGTTAGCA-------TAATATCTAATAAATAGAAATATA
Lolium_multiflorum					GCTTCGGA-ATAGTAGAATAATTC-GGAATAGTGGCCAAAATCTTGGGAAAATCTAAGTTAATGATCAATAGGTTTGGATAAAGAATT------TAGGAAGGATATTCTCATACTGACACAATACAAGGACAAGT----------------ATATGCGAAATCTATCCTTTTTTAGTTAAAAGTTTTCTTCCA---------------------------ATCCAATTTTTCCCTTTAAAGTTAAAGAATTTCATTAGTTAGCA-------TAATATCTAATAAATAGAAATATA
Lolium_perenne					GCTTCGGA-ATAGTAGAATAATTC-GGAATAGTGGCCAAAATCTTGGGAAAATCTAAGTTAATGATCAATAGGTTTGGATAAAGAATT------TAGGAAGGATATTCTCATACTGACACAATACAAGGACAAGT----------------ATATGCGAAATCTATCCTTTTTTAGTTAAAAGTTTTCTTCCA---------------------------ATCCAATTTTTCCCTTTAAAGTTAAAGAATTTCATTAGTTAGCA-------TAATATCTAATAAATAGAAATATA
Deschampsia_antarctica					GC-------------------TTC-TGAATAGCGGCCAAAATCTTGGGAAAATATAAGTTAATGATCAATAGGTTTGGATAAAGAATT------TAGGAAGGATATTCTCATACTGACACAATACAAGGACAAGT----------------GTATGTGAAATCTATCCTTTTTTAGTTAAAAGTTTTCTTCCA---------------------------ATCCAATTTTTCCTTTTAAAGTTAAAGAATTTCATTAGTTACCA-------TAATATCTAATAAATAGAAA-ATA
Puccinellia_nuttalliana					GCTTCGGACATAGTAGAATAATTC-GGAATAGCGGCCAAAATCTTGGGAAAATCTAAGTTAATGATCAATAGGTTTGGATAAATAATT------TAGGAAGCATATTCTCATACGGACACAATACAAGGACAAGT----------------ATATGTGAAATCCATCCTTTTTTAGTTAAAAGTTTTCTTCCAATCCAATCTTTCCCTTTTTCGA-----ATCCCATTTTTCCCTTTAAAGTTAAAGAATTTCTTTAGTTAGCA-------TAATATCTAATAAATAGAAA-ATA
Dactylis_glomerata					GCTTCGGA-ATAGTAGAATAATTA-GGAATAGCGGCCAAAATCTTGGGAAAATCTAAGTTAATGA--AATAGGTTTGGATAAAAAATT------TAGGAAGGATATTCTCATACTGCCACAATACAAGGACAAGT----------------ATATGTGAAATCTATCCTTTTTTAGTTAAAAGTTTTCTTCCA---------------------------ATCCAAATTTTTCCTTTAAAGTTAAAGAATTTCATTAGTTAGCA-------TAATATCTAATAAATAGAAA-ATA
Kengyilia_melanthera					-------------------------------------------------------------------------------------------------------------------------------------------------------------------------------------------------------------------------------------------------------------------------------------------------------
Helictochloa_hookeri					GCTT--------------------CGGAATAGCGGCCAAAATCCTGGGAAAATCTAAGTTAATGATCAATAGGTTTGCATAAAGAATT------TAGGAAGGATATTCTCATACTGACACAATACAAGGACA----------------AGTATATGTGAAATCTATCCTTTTTTAGTTAAAAGTTTTCTTCCAATCCAATTTTTCC----------------------TTTCCCTTTAAAGTTAAAGAATTTCATTAGTTAGCA-------TAATATCTAATAAATAGA------
Lamarckia_aurea	34				TTTAAAGTTAAAGAATTTCATTAGTTAGCA-------TAATATCTAATAAATAGAAA-ATAGA-ATAGTAGATAATCCGGTATAAAAA-AAGGAAAACATTCTTT---GAATCAAGATTCGTAATTAATCCTTTGTTTTGCTTGTTGGATTAGGTCTAACTTTCTTGAACAAACTGCGAGCGTGGAACTTTACGAGATGAAATAG
Ventenata_macra					TTTAAAGTTAAAGAATTTCATTAGTTAGCA-------TAATATGTAATAAATAGAAA-ATAGA-ATAGTGGATAATCCGGTATAAAAG-AAGTAAAACATTCTTTGAAGAATCCAGATTCGTAATTAATCC-TTGTCTTGTTTGTTGGATTAGGTCTAACTTTCTTGAACAAACTGCGAACGTGGAACTTTACGAGATGAAATAG
Scolochloa_festuaceae					TTTAAAGTTAAAGAATTTCATTAGTTAGCA-------TAATATCTAATAAATAGAAA-ATAGA-ATAGTAGATAATCTGGTATAAAAG-AGGGAAAACATTCTTTGAAGAATCAAGATTCGTAATTAATCC-TTGTCTTGTTTGTTGGATTAGGTCTAACTTTCTTGAACAAACTGCGAGCGTGGAACTTTACGAGATGAAATAG
Nephelochloa_orientalis					TTTAAAGTTAAAGAATTTCATTAGTTAGCA-------TAATATGTAATAAATAGAAA-ATAGA-ATAGTGGATAATCCGGTATAAAAG-AAGGAAAACTTTCTTTGAAGAATCAAGATTCGTAATTAATCC-TTGTCTTGTTTGTTGGATTAGGTCTAACTTTCTTGAACAAACTGCGAACGTGGAACTTTACGAGATGAAATAG
Holcus_lanatus					TTTAAAGTTAAAGAATTTCATTAGTTAGCATAATATCTAATATCTAATAAATAGAAA-ATAGA-ATAGTAGATAATCCGGTATAAAAG-AAGGAAAACATTCTTTGAAGAATCAAGATTCGTAATTAATCC-TTGTCTTGTTTGTTGGATTAGGTCTAACTTTCTTGAACAAACTGCGAGCGTGGAACTTTACGAGATGAAATAG
Poa_subgen_Stenopoa					TTTAAAGTTAAAGAATTTCATTAGTTAGCA-------TAATATCGAATAAATAGAAA-ATAGA-ATAGTAGATAATCCAGTATAAAAA-AAGGAAAACATTCTTTGAAGAATCAAGATTCGTAATTAATCC-TTGTCTTGTTTGTTGGATTAGGTCTAACTTTCTTAAACAAACTGCGAGCGTGGAACTTTACGAGATGAAATAG
Festuca_ovina					1-------TAAAGAATTTCATTAGTTAGCA-------TAATATCTAATAAATAAAAA-ATAGA-ATAGTAGATAATCTGGTATAAAAG-AAAGAAAACATTCTTTGAAGAATCAAGATTCGTAATTAATCC-TTGTCTTGCTTGTTGGATTAGGTCTAACTTTCTTGAACAAACTGCGAGCGTGGAACTTTATGAGATGAAATAG
Desmazeria_sicula					TTTAAAGTTAAAGAATTTCATTAGTTAGCA-------TAATATCTAATAAATGGAAA-ATAGA-ATAGTAGATAATCTCGTATAAAAG-AAGGAAAACATTCTTTGAAGAATCCAGATTCGTAATTAATCCTTGTCTTGTGTGTTTGGATTAGGTCTAACTCTCTTGAACAAACTACGAGCGTGCAACTTTAGGAGATGAAATAG
Catapodium_rigidum		199 (Deletion)	69295	59493	TTT-------------------------------------------------------------------------------------------------------------------------------------------------------------------------------------------------------TAG
Catapodium_marinum		199 (Deletion)	69295	59493	TTT-------------------------------------------------------------------------------------------------------------------------------------------------------------------------------------------------------TAG
Castellia_tuberculosa					1-------TAAAGAATTTCATTAGTTAGCA-------TAATATCTAATAAATAGAAA-ATAGA-ATAGTAGATAATCTGGTATAAAAG-AAGGAAAACATTCTTTGAAGAATCAAGATTCGTAATTAATCC-TTGTCTTGTTTGTTGGATTAGGTCTAACTTTCTTGAACAAACTGCGAACGTGGAACTTTATGAGATGAAATAG
Ammochloa_palestina					TTTAAAGTTAAAGAATTTCATTAGTTAGCA-------TAACATCTAAT-------AA-ATAGA-ATAGTAGAAAATATGCTTTAAAAGTAAAGAAAACATTCTTT---GAATCAAGATTCGTAATTCATCC-TTGTCTTGTTTGTTGGATTAGGTCTAACTTTCTTGAACAAACTGCGAGCATGGAACTTTACGAGATGAAATAG
Alopecurus_arundinaceus					1---------------------------------------------------------ATAGA-ATAGTGGATAATACGGTATAAAAG-AAGGAAAACATTCTTTGAAGAATCAAGATTCGTAATTAATCC-TTGTCTTGTTTGTTGGATTAGGTCTAACTTTCTTGAACAAACTGCGAGCGTGGAACTTTACGAGATGAAATAG
Poa_palustris					TTTAAAGTTAAAGAATTTCATTAGTTAGCA-------TAATATCGAATAAATAGAAA-ATAAA-ATAGTAGATAATCCAGTATAAAAA-AAGGAAAACATTCTTTGAAGAATCAAGATTCGTAATTAATCC-TTGTCTTGTTTGTTGGATTAGGTCTAACTTTCTTGAACAAACTGCGAGCGTGGAACTTTACGAGATGAAATAG
Festuca_ovina_NC_019649					1-------TAAAGAATTTCATTAGTTAGCA-------TAATATCTAATAAATAAAAA-ATAGA-ATAGTAGATAATCTGGTATAAAAG-AAAGAAAACATTCTTTGAAGAATCAAGATTCGTAATTAATCC-TTGTCTTGTTTGTTGGATTAGGTCTAACTTTCTTGAACAAACTGCGAGCGTGGAACTTTATGAGATGAAATAG
Festuca_altissima					TTTAAAGTTAAAGAATTTCATTAGTTAGCA-------TAATATCTAATAAATAGAAA-ATAGA-ATAGTAGATAATCTGGTATAAAAG-AAGGAAAACATTCTTTGAAGAATCAAGATTCATAATTAATCC-TTGTCTTGTTTGTTGGATTAGGTCTAACTTTATTGAACAAACTGCGAGCGTGGAACTTTATGAGATGAAATAG
Festuca_arundinacea					TTTAAAGTTAAAGAATTTCATTAGTTAGCA-------TAATATCTAATAAATAGAAATATAGATATAGTAGATAATCTGGTATAAAAG-AAGGAAAACATTCTTTGAAGAATCAAGATTCATAATTAATCC-TTGTCTTGTTTGTTGGATTAGGTCTAACTTTCTTGAACAAACTGCGAGCGTGGAACTTTATGAGATGAAATAG
Festuca_pratensis					TTTAAAGTTAAAGAATTTCATTAGTTAGCA-------TAATATCTAATAAATAGAAATATAGATATAGTAGATAATCTGGTATAAAAG-AAGGAAAACATTCTTTGAAGAATCAAGATTCATAATTAATCC-TTGTCTTGTTTGTTGGATTAGGTCTAACTTTCTTGAACAAACTGCGAGCGTGGAACTTTATGAGATGAAATAG
Lolium_multiflorum					TTTAAAGTTAAAGAATTTCATTAGTTAGCA-------TAATATCTAATAAATAGAAATATAGATATAGTAGATAATCTGGTATAAAAG-AAGGAAAACATTCTTTGAAGAATCAAGATTCATAATTAATCC-TTGTCTTGTTTGTTGGATTAGGTCTAACTTTCTTGAACAAACTGCGAGCGTGGAACTTTATGAGATGAAATAG
Lolium_perenne					TTTAAAGTTAAAGAATTTCATTAGTTAGCA-------TAATATCTAATAAATAGAAATATAGATATAGTAGATAATCTGGTATAAAAG-AAGGAAAACATTCTTTGAAGAATCAAGATTCATAATTAATCC-TTGTCTTGTTTGTTGGATTAGGTCTAACTTTCTTGAACAAACTGCGAGCGTGGAACTTTATGAGATGAAATAG
Deschampsia_antarctica					TTTAAAGTTAAAGAATTTCATTAGTTACCA-------TAATATCTAATAAATAGAAA-ATAGA-ATAGTAAATAATATGGTATAAAAG-AAAGAAAACATTCTTTGAAGAATCAAGATTTGTAATTAATTC-TTGCCTTGTTTGTTGGATTAGGTCTAACTTTCTTGAACAAACTGCGAGCGTGGAACTTTACGAGATGAAATAG
Puccinellia_nuttalliana					TTTAAAGTTAAAGAATTTCTTTAGTTAGCA-------TAATATCTAATAAATAGAAA-ATAGA-ATAGTAGATAATCCGGTATAAAAG-AAGTAAAACTTTCTTTGAAGAATCAAGATTCGGAATTAATCC-TTGTCTTGTTTG-------------------------------------GTGGAACTTTAAGAGATGAAATAG
Dactylis_glomerata					TTTAAAGTTAAAGAATTTCATTAGTTAGCA-------TAATATCTAATAAATAGAAA-ATAGA-ATAGTAGATAATCTGGTATAAAAA-AAGGAAAACATTCTTT---GAATCAAGATTCGTAATTAATCCTTTGTCTTGTTTGTTGGATTAGGTCTAACTTTCTTGAACAAACTGCGAGCGTGGAACTTTACGAGATGAAATAG
Kengyilia_melanthera					-------------------------------------------------------------------------------------------------------------------------------------------------------------------------------------------------------------
Helictochloa_hookeri					TTTAAAGTTAAAGAATTTCATTAGTTAGCA-------TAATATCTAATAAATAGA---------ATAGTAGATAATCTGGTATAAAAG-AGGGAAAACATTCTTTGAAGAATCAAGATTCGTAATTAATCC-TTGTCTTGTTTGTTGGATTAGGTCTAACTTTCTTGAACAAACT-------TGGAACTTTACGAGATGAAATAG
Lamarckia_aurea	35				GAATAAAAATAAAGTAAATTCAAGGAAGAAC--------TTTT---TTTTTAAGGGTCTCA----GGGGGGGCCGTGGAAAGCTTTTCTTCTCCTCTTATTACATATGGAATACAAC---------------CAGTTAAAATAAGACAGTT--------------AAAATAAGAAGGAATAGGGGA------ATATTTGACCGTTCACTCGAAAAAGAGGG--TCCTATTGAAAAAGAAATAATACAAAATAGAAAGAAG---TTTTTTTTCAAA
Ventenata_macra					AGCT------------------------------TTCCTT----------------------------------------------------------------------------------------------------------------------------------------------------------------------------------------------------------------------------TTTTTTTTTC---AA
Scolochloa_festuaceae					GAATAAAAATAAAGTAAATTCAAGGAAGAG--------CTTTCTT-TTTTTAAGGGTCCCCTGGG-----GGTCGTGGAATGCTTTTCTTCTCCTCTTATTCCATATGGAATACAAC---------------CAGTTAAAATAAGACAGTTAAAAT---------AAAATAAGAAGGAATAGGGGA------ATATTTGACCGTTCACTCCAAAAAGAGGG--TCCTATTGAAAAAGAAATAATCCAAAATAGAAAGAAG-TTTTTTTTTTCAAA
Nephelochloa_orientalis					AGCT------------------------------TTCCTTTTT----TTTTAAGGGTCCCTCACGG----GGTCGTGGAATGCTTTTCTTCTCCTCTTATTCCATATGGAATACAAC---------------CAGTT----------------------------AAAATAAGAAGGAATAGGGGA------ATATTTCACCGTTCACTCCAAAAAGAGGG--TCCTATTGAAAAAGAAATAATACAAAATAGAAAGAAGTTTTTTTTTC---AA
Holcus_lanatus					GAATAAAAATAAAGTAAATTCAAGGAAGAA------------------------------------------------------------------------------------------------------C----------------------T---------------------------------------------------------------------------------------------------------TTCGTTTTTTTTTA
Poa_subgen_Stenopoa					ATCT------------------------------TTCTTTTTTTT--TTTTTAGGGTCCCTCAGGG----GGTCGTGGAATGCTTTTTTTCTTCTCTTATTCCATATGGAATACAAT---------------CAGTT----------------------------AAAATAAGAAGGAATAGGGGA------ATATTTCACTGTTCACTCTAAAAAGAGGGTCTCCTATTGAAAAAGAAATAATACAAAATAGAAAGAATTTTTTTTTTT-CAAA
Festuca_ovina					GAATAAAAATAAAGTAAATTCAAGGAAGAG----CTTTCTTTTTT-TTTTTAAGGGTCCCCTGGGG----GGTCGTGGAATGCTTTTCTTCTCCTCTTATTCCATATGGAGTACAAC---------------CAGCTAAAATAAGATAAGACAGTT---------AAAATAAGAAGGAATAGGGGA------ATATTTGACCGTTCGCTCCAAAAAGAGGG--TCCTATTGAAAAAGAAATAATCCAAAATAGAAAGAAGTTTTTTTTTTTCAAA
Desmazeria_sicula					GAATAAAAATAAAGTAAATTAAAGGAAGAG------------CTTTTTTTTAAAGGTCCCCAGGGG----AGTCGTGGAATGCTTTTCTTCTCCTCTTATTCCATATGGAATACAAC---------------CAGCCAGTT------------------------AAAATAAGAAGGAGTAGGGGA------ATATTTGACCATTCACTCCAAAAAGAGGG--TCCTATTGAAAAAGAAATAATCCAAAATAGAAATAAG--TTTTTTTTTCAAA
Catapodium_rigidum					GAATAAAAATCAAGTAAATTAAAGGAAGAG------------CTTTTTTTT-----------------------------------------------------------------------------------------------------------------------------------------------------------------------------------------------------------------------------AAA
Catapodium_marinum					GAATAAAAATCAAGTAAATTAAAGGAAGAG------------CTTTTTTTT-----------------------------------------------------------------------------------------------------------------------------------------------------------------------------------------------------------------------------AAA
Castellia_tuberculosa		237 (Deletion)	69578	69814	G---------------------------------------------------------------------------------------------------------------------------------------------------------------------------------------------------------------------------------------------AATAATCCAAAATAGAAAGAAG-TTTTTTTTTTCAAA
Ammochloa_palestina					GAATAAAAATAAAATAAATTCAAGGAAGAGCTTTCTTTTTTTT---TTTTTAGAGTCCCAGGGGGGGGGGGGTCGTGGAAAGCTTTTCTTCTCCTCTTATTCCATATGGAATACAAC---------------CAGTTAAAATAAGACAGTT--------------AAAATAAGAAGGAATAGGGGA------ATATTTGACCGTTCACTCCAAAAAGAGGG--TCCTATTGAAAAAGAAATAATCCAAAATAGAAAGCCG---TTTTTTTTTCAA
Alopecurus_arundinaceus					AG-----------------------------------CTTTTT----TTTTAAGGGTCCCTCAGGG----GGTTGTGGAATGCTTTTCTTCTACTCTTATTCCATATGGAATACAAC---------------CAGTT----------------------------AAAATAAGAAGGAATAGGGGA------ATATTTCACCGTTCACTCCAAAAAGAGGG--TCCTATTGAAAAAGAAATAATACAAAATAGAAAGAAGTTTTTTTTTTTCAAA
Poa_palustris					AGCT------------------------------TTCTTTTTTTT-TTTTTTAGGGTCCCTCAGGG----GGTCGTGGAATGCTTTTTTTCTTCTCTTATTCCATATGGAATACAAC---------------CAGTT----------------------------AAAATAAGAAAGAATAGGGGA------ATATTTCACTGTTCACTCTAAAAAGAGGGTCTCCTATTGAAAAAGAAATAATACAAAATAGAAAGAA-TTTTTTTTTT-CAAA
Festuca_ovina_NC_019649					GAATAAAAATAAAGTAAATTCAAGGAAGAG----CTTTC---TTT-TTTTTAAGGGTCCCCTGGGG----GGTCGTGGAATGCTTTTCTTCTCCTCTTATTCCATATGGAGTACAAC---------------CAGCTAAA-----ATAAGACAGTT---------AAAATAAGAAGGAATAGGGGA------ATATTTGACCGTTCGCTCCAAAAAGAGGG--TCCTATTGAAAAAGAAATAATCCAAAATAGAAAGAAGTTTTTTTTTTTCAAA
Festuca_altissima					GAATAAAAATAAAGTAAATTCAAGGAAGAGAAGAGCTTTCTTTTT-TTTTTAAGGGTCCCCCGGGG----GGTCGTGGAATGCTTTTCTTCTCCTCTTATTCCATATGGAATACAAC---------------CAGTTAAAATAAGACAGT-----T---------AAAATAAGAAGGAATAGGGGA------ATATTTGACCGTTCACTCCAAAAAGAGGG--TCCTATTGAAAAAGAAATAATCCAAAATAGAAAGAAG--TTTTTTTTTCAAA
Festuca_arundinacea					GAATAAAAATAAAGTAAATTCAAGGAAGAG-------CTTTCTTT-TTTTTAAGGGTCCCCCAGGGGGGAGGTCGTGGAATGCTTTTCTTCTCCTCTTATTCCATATGGAATACAACC--------------CAGTTAAAATAAGACACT-----T---------AAAATAAGAAGGAATAGGGGA------ATATTTGACCCTTCACTCCAAAAAGATGG--TCCTATTGAAAAAGAAATAATCCAAAATAGAAATAAGTTTTTTTTTTTCAAA
Festuca_pratensis					GAATAAAAATAAAGTAAATTCAAGGAAGAG-------CTTTCTTT-TTTTTAAGGGTCCCCCAGGGGGGAGGTCGTGGAATGCTTTTCTTCTCCTCTTATTCCATATGGAATACAACC--------------CAGTTAAAATAAGACAGT-----T---------AAAATAAGAAGGAATAGGGGA------ATATTTGACCCTTCACTCCAAAAAGATGG--TCCTATTGAAAAAGAAATAATCCAAAATAGAAATAAG-TTTTTTTTTTCAAA
Lolium_multiflorum					GAATAAAAATAAAGTAAATTCAAGGAAGAG-------CTTTCTTT-TTTTTAAGGGTCCCCCAGGGGGGAGGTCGTGGAATGCTTTTCTTCTCCTCTTATTCCATATGGAATACAACCCAGTTAAAATAAGACAGTTAAAATAAGACAGT-----T---------AAAATAAGAAGGAATAGGGGA------ATATTTGACCCTTCACTCCAAAAAGATGG--TCCTATTGAAAAAGAAATAATCCAAAATAGAAATAAG-TTTTTTTTTTCAAA
Lolium_perenne					GAATAAAAATAAAGTAAATTCAAGGAAGAG-------CTTTCTTT-TTTTTAAGGGTCCCCCAGGGGGGAGGTCGTGGAATGCTTTTCTTCTCCTCTTATTCCATATGGAATACAACC--------------CAGTTAAAATAAGACAGT-----T---------AAAATAAGAAGGAATAGGGGA------ATATTTGACCCTTCACTCCAAAAAGATGG--TCCTATTGAAAAAGAAATAATCCAAAATAGAAATAAGTTTTTTTTTTTCAAA
Deschampsia_antarctica					GAATAAAAATAAAGTAAATTCAAGGAAGAG------CTTTCTTTT-TTTTTAAGGGTCCCCCAGGG----GGTCGTGGAATGCTTTTCTTCTCCTCTTATTCCATATGGAATACAAC---------------CAGTTAAAATAAGACAGTGAAAATAAGACAGTGAAAATAAGAAGGAATAGGGGAATATTAATATTTGACCGTTCACTCCAAAAAGAGGG--TCCTATTGAAAAAGAAATAATCCAAAATAGAAAGAAG-TTTTTTTTTTCAAA
Puccinellia_nuttalliana					GAATAAAAATAAAGTAAATTCAAAGAAAAGAAGAGCTTTCTTTTTGTTTTTAAGGGTCCCTCAGGG----GGTCTTGGAATGCTTTTCTTCTCCTCTTATTCCATATGGAATACAGC---------------CAGTT----------------------------AAAATAAGAAGGAATAGGGGA------ATATTTAACCGTTCACTCCAAAAAGAGGG--TCCTATTGAAAAATAAATAATCCAAAATAGAAAGAAG-TTTTTTTTTTCAAA
Dactylis_glomerata					GAATAAAAATAAAGTAAATTCAAGGAAGAGC---------TTT---TTTTTAAGGGTCTCAGGGGGGGGGGGCCGTGGAAAGCTTTTCTTCTCCTCTTATTCCATATGGAATACAAC---------------CAGTTAAAATAAGACAGTT--------------AAAATAAGAAGGAATAGGGGA------ATATTTGACCGTTCACTCGAAAAAGAGGG--TCCTATTGAAAAAGAAATAATACAAAATAGAAAGAAG--TTTTTTTTTCAAA
Kengyilia_melanthera					------------------------------------------------------------------GGGAGGTCGTGGAATGCTTTTCTTCTCCTCTTATTCCATATGGAATACAAC-------------------------------------------CAGTTAAAATAAGAAGGAATAGGGGA-------ATATTCGATCGTTCACTTCAAAAAGAGGG--TCCTATTGAAAAAGAAATTATCCAAAATAGAAAGAAGTTTTTTTTTTTCAAA
Helictochloa_hookeri					AAATAAAAATAAAGTAAATTCAAGGAAGAGC------TTTCTTTTTTTTTTAAGGGTCCCC-----AGGGGGTCGTGGAATGCTTTTCTTCTCCTCTTATTCCATATGGAATACAA-CCAGTTAAAATAAGACAGTT----------------------------AAAATAAGAAGGAATAGGGGAATATTTGATATTTGACCGTTCACTCCAAAAAAAAAGGGTCCTATTGAAAAAGAAATAATCCAAAATAGAAAGAAG---TTTTTTTTCAAA
Lamarckia_aurea	36				1---TTTT---TTTTTAAGGGTCTCA----GGGGGGGCCGTGGAAAGCTTTTCTTCTCCTCTTATTACATATGGAATACAAC---------------CAGTTAAAATAAGACAGTT--------------AAAATAAGAAGGAATAGGGGA------ATATTTGACCGTTCACTCGAAAAAGAGGG--TCCTATTGAAAAAGAAATAATACAAAATAGAAAGAAG---TTTTTTTTCAAA
Ventenata_macra		220 (Deletion)	69617	69836	TCCTT----------------------------------------------------------------------------------------------------------------------------------------------------------------------------------------------------------------------------TTTTTTTTTC---AA
Scolochloa_festuaceae					1--CTTTCTT-TTTTTAAGGGTCCCCTGGG-----GGTCGTGGAATGCTTTTCTTCTCCTCTTATTCCATATGGAATACAAC---------------CAGTTAAAATAAGACAGTTAAAAT---------AAAATAAGAAGGAATAGGGGA------ATATTTGACCGTTCACTCCAAAAAGAGGG--TCCTATTGAAAAAGAAATAATCCAAAATAGAAAGAAG-TTTTTTTTTTCAAA
Nephelochloa_orientalis					TCCTTTTT----TTTTAAGGGTCCCTCACGG----GGTCGTGGAATGCTTTTCTTCTCCTCTTATTCCATATGGAATACAAC---------------CAGTT----------------------------AAAATAAGAAGGAATAGGGGA------ATATTTCACCGTTCACTCCAAAAAGAGGG--TCCTATTGAAAAAGAAATAATACAAAATAGAAAGAAGTTTTTTTTTC---AA
Holcus_lanatus					-------------------------------------------------------------------------------------------------C----------------------T---------------------------------------------------------------------------------------------------------TTCGTTTTTTTTTA
Poa_subgen_Stenopoa					TCTTTTTTTT--TTTTTAGGGTCCCTCAGGG----GGTCGTGGAATGCTTTTTTTCTTCTCTTATTCCATATGGAATACAAT---------------CAGTT----------------------------AAAATAAGAAGGAATAGGGGA------ATATTTCACTGTTCACTCTAAAAAGAGGGTCTCCTATTGAAAAAGAAATAATACAAAATAGAAAGAATTTTTTTTTTT-CAAA
Festuca_ovina					TTTCTTTTTT-TTTTTAAGGGTCCCCTGGGG----GGTCGTGGAATGCTTTTCTTCTCCTCTTATTCCATATGGAGTACAAC---------------CAGCTAAAATAAGATAAGACAGTT---------AAAATAAGAAGGAATAGGGGA------ATATTTGACCGTTCGCTCCAAAAAGAGGG--TCCTATTGAAAAAGAAATAATCCAAAATAGAAAGAAGTTTTTTTTTTTCAAA
Desmazeria_sicula					1------CTTTTTTTTAAAGGTCCCCAGGGG----AGTCGTGGAATGCTTTTCTTCTCCTCTTATTCCATATGGAATACAAC---------------CAGCCAGTT------------------------AAAATAAGAAGGAGTAGGGGA------ATATTTGACCATTCACTCCAAAAAGAGGG--TCCTATTGAAAAAGAAATAATCCAAAATAGAAATAAG--TTTTTTTTTCAAA
Catapodium_rigidum		221 (Deletion)	69628	69848	1------CTTTTTTTT-----------------------------------------------------------------------------------------------------------------------------------------------------------------------------------------------------------------------------AAA
Catapodium_marinum		221 (Deletion)	69628	69848	1------CTTTTTTTT-----------------------------------------------------------------------------------------------------------------------------------------------------------------------------------------------------------------------------AAA
Castellia_tuberculosa					1----------------------------------------------------------------------------------------------------------------------------------------------------------------------------------------------------------AATAATCCAAAATAGAAAGAAG-TTTTTTTTTTCAAA
Ammochloa_palestina					TTTTTTTT---TTTTTAGAGTCCCAGGGGGGGGGGGGTCGTGGAAAGCTTTTCTTCTCCTCTTATTCCATATGGAATACAAC---------------CAGTTAAAATAAGACAGTT--------------AAAATAAGAAGGAATAGGGGA------ATATTTGACCGTTCACTCCAAAAAGAGGG--TCCTATTGAAAAAGAAATAATCCAAAATAGAAAGCCG---TTTTTTTTTCAA
Alopecurus_arundinaceus					1-CTTTTT----TTTTAAGGGTCCCTCAGGG----GGTTGTGGAATGCTTTTCTTCTACTCTTATTCCATATGGAATACAAC---------------CAGTT----------------------------AAAATAAGAAGGAATAGGGGA------ATATTTCACCGTTCACTCCAAAAAGAGGG--TCCTATTGAAAAAGAAATAATACAAAATAGAAAGAAGTTTTTTTTTTTCAAA
Poa_palustris					TCTTTTTTTT-TTTTTTAGGGTCCCTCAGGG----GGTCGTGGAATGCTTTTTTTCTTCTCTTATTCCATATGGAATACAAC---------------CAGTT----------------------------AAAATAAGAAAGAATAGGGGA------ATATTTCACTGTTCACTCTAAAAAGAGGGTCTCCTATTGAAAAAGAAATAATACAAAATAGAAAGAA-TTTTTTTTTT-CAAA
Festuca_ovina_NC_019649					TTTC---TTT-TTTTTAAGGGTCCCCTGGGG----GGTCGTGGAATGCTTTTCTTCTCCTCTTATTCCATATGGAGTACAAC---------------CAGCTAAA-----ATAAGACAGTT---------AAAATAAGAAGGAATAGGGGA------ATATTTGACCGTTCGCTCCAAAAAGAGGG--TCCTATTGAAAAAGAAATAATCCAAAATAGAAAGAAGTTTTTTTTTTTCAAA
Festuca_altissima					CTTTCTTTTT-TTTTTAAGGGTCCCCCGGGG----GGTCGTGGAATGCTTTTCTTCTCCTCTTATTCCATATGGAATACAAC---------------CAGTTAAAATAAGACAGT-----T---------AAAATAAGAAGGAATAGGGGA------ATATTTGACCGTTCACTCCAAAAAGAGGG--TCCTATTGAAAAAGAAATAATCCAAAATAGAAAGAAG--TTTTTTTTTCAAA
Festuca_arundinacea					1CTTTCTTT-TTTTTAAGGGTCCCCCAGGGGGGAGGTCGTGGAATGCTTTTCTTCTCCTCTTATTCCATATGGAATACAACC--------------CAGTTAAAATAAGACACT-----T---------AAAATAAGAAGGAATAGGGGA------ATATTTGACCCTTCACTCCAAAAAGATGG--TCCTATTGAAAAAGAAATAATCCAAAATAGAAATAAGTTTTTTTTTTTCAAA
Festuca_pratensis					1-CTTTCTTT-TTTTTAAGGGTCCCCCAGGGGGGAGGTCGTGGAATGCTTTTCTTCTCCTCTTATTCCATATGGAATACAACC--------------CAGTTAAAATAAGACAGT-----T---------AAAATAAGAAGGAATAGGGGA------ATATTTGACCCTTCACTCCAAAAAGATGG--TCCTATTGAAAAAGAAATAATCCAAAATAGAAATAAG-TTTTTTTTTTCAAA
Lolium_multiflorum					1-CTTTCTTT-TTTTTAAGGGTCCCCCAGGGGGGAGGTCGTGGAATGCTTTTCTTCTCCTCTTATTCCATATGGAATACAACCCAGTTAAAATAAGACAGTTAAAATAAGACAGT-----T---------AAAATAAGAAGGAATAGGGGA------ATATTTGACCCTTCACTCCAAAAAGATGG--TCCTATTGAAAAAGAAATAATCCAAAATAGAAATAAG-TTTTTTTTTTCAAA
Lolium_perenne					1-CTTTCTTT-TTTTTAAGGGTCCCCCAGGGGGGAGGTCGTGGAATGCTTTTCTTCTCCTCTTATTCCATATGGAATACAACC--------------CAGTTAAAATAAGACAGT-----T---------AAAATAAGAAGGAATAGGGGA------ATATTTGACCCTTCACTCCAAAAAGATGG--TCCTATTGAAAAAGAAATAATCCAAAATAGAAATAAGTTTTTTTTTTTCAAA
Deschampsia_antarctica					1CTTTCTTTT-TTTTTAAGGGTCCCCCAGGG----GGTCGTGGAATGCTTTTCTTCTCCTCTTATTCCATATGGAATACAAC---------------CAGTTAAAATAAGACAGTGAAAATAAGACAGTGAAAATAAGAAGGAATAGGGGAATATTAATATTTGACCGTTCACTCCAAAAAGAGGG--TCCTATTGAAAAAGAAATAATCCAAAATAGAAAGAAG-TTTTTTTTTTCAAA
Puccinellia_nuttalliana					CTTTCTTTTTGTTTTTAAGGGTCCCTCAGGG----GGTCTTGGAATGCTTTTCTTCTCCTCTTATTCCATATGGAATACAGC---------------CAGTT----------------------------AAAATAAGAAGGAATAGGGGA------ATATTTAACCGTTCACTCCAAAAAGAGGG--TCCTATTGAAAAATAAATAATCCAAAATAGAAAGAAG-TTTTTTTTTTCAAA
Dactylis_glomerata					1----TTT---TTTTTAAGGGTCTCAGGGGGGGGGGGCCGTGGAAAGCTTTTCTTCTCCTCTTATTCCATATGGAATACAAC---------------CAGTTAAAATAAGACAGTT--------------AAAATAAGAAGGAATAGGGGA------ATATTTGACCGTTCACTCGAAAAAGAGGG--TCCTATTGAAAAAGAAATAATACAAAATAGAAAGAAG--TTTTTTTTTCAAA
Kengyilia_melanthera					-------------------------------GGGAGGTCGTGGAATGCTTTTCTTCTCCTCTTATTCCATATGGAATACAAC-------------------------------------------CAGTTAAAATAAGAAGGAATAGGGGA-------ATATTCGATCGTTCACTTCAAAAAGAGGG--TCCTATTGAAAAAGAAATTATCCAAAATAGAAAGAAGTTTTTTTTTTTCAAA
Helictochloa_hookeri					--TTTCTTTTTTTTTTAAGGGTCCCC-----AGGGGGTCGTGGAATGCTTTTCTTCTCCTCTTATTCCATATGGAATACAA-CCAGTTAAAATAAGACAGTT----------------------------AAAATAAGAAGGAATAGGGGAATATTTGATATTTGACCGTTCACTCCAAAAAAAAAGGGTCCTATTGAAAAAGAAATAATCCAAAATAGAAAGAAG---TTTTTTTTCAAA
Lamarckia_aurea	37				TCTCCTATAAAAGAAAGATTGCTTTTCC-------TTGGTAATGTATAGATAGGAAGAAGGGGTCATCTTTTTCTTTTTTAGGGATAGGCAAATTTCGTCT
Ventenata_macra					TCGCCTATAAAAGAAAGATTACTTCTCC-------TTGGTAATAT----ATAGGAAGAAGGAGTCATCTTTTTCTTTTTTAGGGATAGGTAAATTTCGTCT
Scolochloa_festuaceae					TCGCCTATAAAAGAAAGATTGCTTTTCC-------TTGGTAATGT----ATAGGAAGAAGGGGTCATCTTTTTCTTTTTTAGGGATAGGCAAATTTCGTCT
Nephelochloa_orientalis					TCGCCTATAAAAGAAAGATTACTTCTCC-------TTGGTAATAT----ATAGGAAGAAGGAGTCATCTTTTTCTTTTTTAGGGATAGGTAATTT------
Holcus_lanatus					TCGCCTATAAAAGAAAGATTGCTTTTCC-------TTGGTAATGT----ATAGGAAGAAGGGGTCATCTTTTTCTTTTTTAGGGATAGGCAAATTTCGTCT
Poa_subgen_Stenopoa					TCGCCTATAAAAGAAAGATTACTTTTCC-------TTGGTAATAT----ATAGGAAGAAGGAGTCATCTTTTTCTTTGTTAGGGATAGGAAAATTTCATCT
Festuca_ovina					TCGACTATAAAAGAAAGATTGCTTTTCC-------TTGGTAATGT----ATAGGAAGAAGGGGTCATCTTTTTCTTTTTTAGGGATAGGCAAATTTCGTCT
Desmazeria_sicula		95 (Deletion)	71234	71328	TCG-----------------------------------------------------------------------------------------------TCT
Catapodium_rigidum					TCGCCTATAAAAGAAAGATTGCTTTTCC-------TTGGTAATGT----ATAGGAAGAAGGGGTCATCTTTTTCTTTTTTAGGGATAGGCAAATTTCATCT
Catapodium_marinum					TCGCCTATAAAAGAAAGATTGCTTTTCC-------TTGGTAATGT----ATAGGAAGAAGGGGTCATCTTTTTCTTTTTTAGGGATAGGCAAATTTCATCT
Castellia_tuberculosa					TCGTCTATAAAAGAAAGATTGCTTTTCC-------TTGATAATGT----ATAGGACGAAGGGGTCATCTTTTTCTTTTTTAGGGATAGCCAAATTTCGTCT
Ammochloa_palestina					TCACCTATAAAAGAAAGATTGCTTTTCC-------TTGATAATGT----ATAGGAAGAAGGGGTCATCTTTTTCTTTTTTAGGGATAGGCAAATTTTGTCT
Alopecurus_arundinaceus					TCGCCTATAAAAGAAAGATTACTTTTACTTGGTAATTGGTAATAT----ATAGGAAGAAGGAGTCATCTTTTTCTTTTTTAGGGATAGGTTAATTTCGTCT
Poa_palustris					TCGCCTATAAAATAAAGATTACTTTTCC-------TTGGTAATAT----ATAGGAAGAAGGAGTCATCTTTTTCTTTGTTAGGGATAGGAAAATTTCATCT
Festuca_ovina_NC_019649					TCGACTATAAAAGAAAGATTGCTTTTCC-------TTGGTAATGT----ATAGGAAGAAGGGGTCATCTTTTTCTTTTTTAGGGATAGGCAAATTTCGTCT
Festuca_altissima					TCGCCTATAAAAGAAAGATTGCTTTTAC-------TTGGTAATGT----ATAGGAAGAAGGGGTCATCTTTTTCTTTTTTAGGGATAGGCAAATTTCGTCT
Festuca_arundinacea					TAGCCTATAAAAGAAAGATTGCTTTTCC-------TTGGTAATGT----ATAGGAAGAAGGGGTCATCTTTTTCTTTTTTAGGGATAGGCAAATTTCGTCT
Festuca_pratensis					TAGCCTATAAAAGAAAGATTGCTTTTCC-------TTGGTAATGT----ATAGGAAGAAGGGGTCATCTTTTTCTTTTTTAGGGATAGGCAAATTTCGTCT
Lolium_multiflorum					TAGCCTATAAAAGAAAGATTGCTTTTCC-------TTGGTAATGT----ATAGGAAGAAGGGGTCATCTTTTTCTTTTTTAGGGATAGGCAAATTTCGTCT
Lolium_perenne					TAGCCTATAAAAGAAAGATTGCTTTTCC-------TTGGTAATGT----ATAGGAAGAAGGGGTCATCTTTTTCTTTTTTAGGGATAGGCAAATTTCGTCT
Deschampsia_antarctica					TTGCCTATAAAAGAAAGATTGCTTTTCC-------TTGGTAATGT----ATAGGAAGAAGTGGTCATTTTTTTCTTTTTTAGGGATAGGGAAATTTCCTCT
Puccinellia_nuttalliana					TCTCCTATAAAAGAAGGATTACTTTTAC-------TTGGTAATGT----ATAGGAAGAAGGGGTCATCTTTTTCTTTTTTAGGGATAGGCAAATTTCGTCT
Dactylis_glomerata					TCGCCTATAAAAGAAAGATTGCTTTTCC-------TTGGTAATGTATAGATAGGAAGAAGGGGTCATCTTTTTCTTTTTTAGGGATAGGCAAATTTCGTCT
Kengyilia_melanthera					TCGCCTATAAAAGAAGGATTACTTTTCCTTGGTA-----------ATATATAGGAAGAAGGGGTCATCTTTTTCTTTTTTAGGGGTAGGAAAATTTAGGAAAATTTCGTCG
Helictochloa_hookeri					TCGCCTATAAAAGAAAGATGGCTTTTCCTTGGTA-----------CTGTATAGGAAGAAGGGGTCATCTTTTTCTTTTTTAGGGATAGGC----------------CGTAT
Lamarckia_aurea	38				TTGACCCTTTTCAATCCTTTTA-TTAGTATCGGAAGGAAAAAGAAAGAA-----AAGATGGATTGGGTTGAACCTCAGAGTCATGAAAAATCTGGTAAATTAATTCCATTTTGGAAAA
Ventenata_macra					TTGACCCTTTTCAATCCTTTTA-TTGGTATCGGAAAGAAAAAGAAAGAA-----AAGATGGATTGGGGTGAACCTCAGAGTCATGAAAAATTTGATA----AATTCTATTTTGGAAAA
Scolochloa_festuaceae					TTGACCCTTTTCAATCCTTTTACTTAGTATCGGAAGGAAAAAGAAAGAA-----AAGATGGATTGGGTTGAACCTCAGAGTCATGAAAAATTTGGTA----AATTCTATTTTGGAAAA
Nephelochloa_orientalis		91 (Deletion)	71600	71690	TTG-------------------------------------------------------------------------------------------ATA----AATTCTATTTTGGAAAA
Holcus_lanatus					TTGACCCTTTTCAATCCTTTTA-TTAGTATCGGAAGGAA----AAATAA-----AAGATGGATTGGGTTGAAGCTGAGAGTCATGAAAAATTTGGTA----AATTCTATTTTGGAAAA
Poa_subgen_Stenopoa					TTGACCCTTTTCAATCCTTTTA-TTAATATCGGAAGGAAAAAGAAAGAA-----GAGATGGATTGGGTTGAACCTCAGAGTCATGAAAAATTTGATA----AATTCTATTTTGGAAAA
Festuca_ovina					TTGACTCTTTTCAATCCTTTTACTTAGTATCGGAAGGAAAAAGAAAGAA-----AAGATGGATTGGGTTGAACCTCAGAGTCATTAAAAATAGGGTA----AATTCTATTTTGGAAAA
Desmazeria_sicula					TCGACCCTTTGGAATCCTTTTA-TTAGTATCGTAAGGAAAAAGAAAGAA-----AAGATGGATTGGGTTGAACCTTAGAGTCATGAAAAATCTGGTA----AATTCTATTTTGGAAAA
Catapodium_rigidum					TTGACCCTTTGGAATCCTTTTA-TTAGTATCGTAAGGAAAAAGAAAGAA-----AAGATGGATTGGGTGGAACCTTAGAGTCATGAAAAATCTGGTA----AATTCTATTTTGGAAAA
Catapodium_marinum					TTGACCCTTTGGAATCCTTTTA-TTAGTATCGTAAGGAAAAAGAAAGAA-----AAGATGGATTGGGTGGAACCTTAGAGTCATGAAAAATCTGGTA----AATTCTATTTTGGAAAA
Castellia_tuberculosa					TTGACCCTTTTCAATCCTTTTACTTAGTATCGGAAGGAAAAAGAAAGAA-----AAGATGGATTGGGTTGAACCTCAGAGTCATGAAAAATTGGGTA----AATTCTATTTTGGAAAA
Ammochloa_palestina					TTGACCCTTTTCAATCCTTTTA-TTAGTATCGGAAGGAAAAAGAAAGAAAAGATAAGATGGATTGGGTTGAACCTCAGAGTCATGAAAAATCTGGTA----AATTCTATTTTGGAAAA
Alopecurus_arundinaceus					TTGACCCTTTTCAATCCTTTTA-TTGGTATCGGAAGGAAAAAGAAAGAA-----AAGATGGATTGGGGTGAACCTCAAAGTCATGAAAAATTTTATA----AATTCTATTTTGGAAAA
Poa_palustris					TTGACCCTTTTCAATCCTTTTA-TTAATATCGGAAGGAAAAAGAAAGAA-----GAGATGGATTGGGTTGAACCTCAGAGTCATGAAAAATTTGATA----AATTCTATTTTGGAAAA
Festuca_ovina_NC_019649	not in other F. ovina	78 (Deletion)	(72606) 71634	71711	TTGACTCTTTTCAATCCTTTTACTTAGTATCGGAAGG------------------------------------------------------------------------------AAA
Festuca_altissima					TTGACCCTTTTCAATCCTTTTACTTAGTATCGGAAGGAAAAAGAAAGAA-----AAGATGGATTGGGTTGAACCTCAGAGTCATGAAAAATTTGGTA----AATTCTATTTTGGAAAA
Festuca_arundinacea					TTGACCCTTTTCAATCCTTTTACTTAGTATTGGAAGGAAAAAGAAATAA-----AAGATGGATTGGGTTGAACCTCAGAGTCATGAAAAATTTGGTA----AATTATATTTTGGAAAA
Festuca_pratensis					TTGACCCTTTTCAATCCTTTTACTTAGTATCGGAAGGAAAAAGAAATAA-----AAGATGGATTGGGTTGAACCTCAGAGTCATGAAAAATTTGGTA----AATTATATTTTGGAAAA
Lolium_multiflorum					TTGACCCTTTTCAATCCTTTTACTTAGTATCGGAAGGAAAAAGAAATAA-----AAGATGAATTGGGTTGAACCTCAGAGTCATGAAAAATTTGGTA----AATTCTATTTTGGAAAA
Lolium_perenne					TTGACCCTTTTCAATCCTTTTACTTAGTATCGGAAGGAAAAAGAAATAA-----AAGATGAATTGGGTTGAACCTCAGAGTCATGAAAAATTTGGTA----AATTATATTTTGGAAAA
Deschampsia_antarctica					TTGACCCTTTTCAATCCTTTTA-TTAATATCGGAAGGAAAAAGAAAGAA-----AAGATGGATTGGGTTGAACCTCAGAGTCATGAAAAATTTGGTA----AATTCTATTTTGGAAAA
Puccinellia_nuttalliana					TTGACCCTTTTCAATCCTTTTATTTAGTATCGGAAGGAAAAATAAAGAA-----AAGATGGATTGGGTTGAACCTCAGAGTTATGAAAAATTGGGTA----AATTCAATT--------
Dactylis_glomerata					TTGACCCTTTTCAATCCTTTTA-TTAGTATCGGAAGGAAAAAGAAAGAA-----AAGATGGATTGGGTTGAACCTCAGAGTCATGAAAAATCTGGTA----AATTCTATTTTGGAAAA
Kengyilia_melanthera					TTTATCCTTTTCAATCTTTCTTTTTTTAGTATCGGAAGGAAAAAGAAAGAA-----AAGATGGATAGGGTTGAACCTCAGAGTCATGAAAAATTTGCTA----AACCCCATTTTTGAAAA
Helictochloa_hookeri					TTGACCCTTTTCAATCCG--TTTATTTAGTATTGGAAGGAAAAAGAAAGAA-----AAGATGGATTGGGTGGAACCTCAGAGTCATGAAAAATTTGGTA----AATTCTATTTTGGAAAA
Lamarckia_aurea	39	54 (Deletion)	75418	75471	TCT------------------------------------------------------ATA
Ventenata_macra					TCT------------------------------ATATGAATACTATAGATTCTATTAATA
Scolochloa_festuaceae					TCT------------------------------ATATGAATACTATAGATTCTATTAATA
Nephelochloa_orientalis					TCT------------------------------ATATGAATACTATAGATTCTATTAATA
Holcus_lanatus					TCT------------------------------ATATGAATACTATAGATTCTATTAATA
Poa_subgen_Stenopoa					TCT------------------------------ATATGA---------------------
Festuca_ovina					TCT------------------------------ATATGAATACTATAGATTCTATTAATA
Desmazeria_sicula		54 (Deletion)	75418	75471	TCT------------------------------------------------------ATA
Catapodium_rigidum		54 (Deletion)	75418	75471	TCT------------------------------------------------------ATA
Catapodium_marinum		54 (Deletion)	75418	75471	TCT------------------------------------------------------ATA
Castellia_tuberculosa					TCT------------------------------ATATGAATACTATAGATTCTATTAATA
Ammochloa_palestina		54 (Deletion)	75418	75471	TCT------------------------------------------------------ATA
Alopecurus_arundinaceus					TCT------------------------------ATATGAATACTATAGATTCTATTAATA
Poa_palustris					TCT------------------------------ATATGA---------------------
Festuca_ovina_NC_019649					TCT------------------------------ATATGAATACTATAGATTCTATTAATA
Festuca_altissima					TCT------------------------------ATATGAATACTATAGATTCTATTAATA
Festuca_arundinacea					TCTTATTCTATATGAATACTATAGATTCTATTAATATGAATACTATAGATTCTATTAATA
Festuca_pratensis					TCTTATTCT------------------------ATATGAATACTATAGATTCTATTAATA
Lolium_multiflorum					TCTTATTCT------------------------ATATGAATACTATAGATTCTATTAATA
Lolium_perenne					TCTTATTCT------------------------ATATGAATACTATAGATTCTATTAATA
Deschampsia_antarctica					TCT------------------------------ATATGAATACTATAGATTC--------
Puccinellia_nuttalliana					TCT------------------------------ATATGAATACTATGGATTCTATTAATA
Dactylis_glomerata		54 (Deletion)	75418	75471	TCT------------------------------------------------------ATA
Kengyilia_melanthera					TCTTATTCTATATGAATACTATAGATTC--------------------------------
Helictochloa_hookeri					TCTTATTCTATATGAATACTATAGATTCTATTAATAT-----------------------
Lamarckia_aurea	40				TGAGTAGTTGTAGGTCCAACTTCGGAAAAGAGAATCTGATAAAGTTTTTCTTGCCTAGAGTCATTGA
Ventenata_macra					TGAGTAGTTGTAGGTCCAACTTCGGAAAAGAGAATCTGATAAAGCTTTTCTTGCCTAGAGTCATTGA
Scolochloa_festuaceae					TGAGTAGTTGTAGGTCCAACTTCGGAAAAGAGAATCTGATAAAGCTTTTCTTGCCTAGAGTCATTGA
Nephelochloa_orientalis					TGAGTAGTTGTAGGTCCAACTTCGGAAAAGAGAATCTGATAAAGCTTTTCTTGCCTAGAGTCATTGA
Holcus_lanatus					TGAGTAGTTGTAGGTCCAACTTCGGAAAATAGAATCTGATAAAGCTTTTCTTGCCTAGAGTCATTGA
Poa_subgen_Stenopoa					TGAGTAGTTGTAGGTCCAACTTCGGAAAAGAGAATCTGATAAAGCTTTTCTTGCCTAAAGTCATTGA
Festuca_ovina					TGAGTAGTTGTAGGTCCAACTTCGGAAAAGAGAATCAGATAAAGCTTTTCTTGCCTAGAGTCATTGA
Desmazeria_sicula					TGAGTAGTTGTAGGTCCAACTTCGGAAAAGAGAATCTGATAAAGCTTTTCTTGCCTAGAGTCATTGA
Catapodium_rigidum					TGAGTAGTTGTAGGTCCAACTTCGGAAAAGAGAATCTGATAAAGCTTTTCTTGCCTAGAGTCATTGA
Catapodium_marinum					TGAGTAGTTGTAGGTCCAACTTCGGAAAAGAGAATCTGATAAAGCTTTTCTTGCCTAGAGTCATTGA
Castellia_tuberculosa					TGAGTAGTTGTAGGTCCAACTTCGGAAAAGAGAATCAGATAAAGCTTTTCTTGCCTAGAGTCATTGA
Ammochloa_palestina					TGAGTAGTTGTAGGTCCAACTTCGGAAAAGAAAATCTGATAAAGCTTTTCTTGCCTAGAGTCATTGA
Alopecurus_arundinaceus					TGAGTAGTTGTAGGTCCAACTTTGGAAAAGAGAATCTGATAAAGCTTTTCTTGCCTAGAGTCATTGA
Poa_palustris					TGAGTAGTTGTAGGTCCAACTTCGGAAAAGAGAATCTGATAAAGCTTTTCTTGCCTAAAGTCATTGA
Festuca_ovina_NC_019649					TGAGTAGTTGTAGGTCCAACTTCGGAAAAGAGAATCAGATAAAGCTTTTCTTGCCTAGAGTCATTGA
Festuca_altissima		61 (Deletion)	80565	80625	TGA-------------------------------------------------------------TGA
Festuca_arundinacea		61 (Deletion)	80565	80625	TGA-------------------------------------------------------------TGA
Festuca_pratensis		61 (Deletion)	80565	80625	TGA-------------------------------------------------------------TGA
Lolium_multiflorum		61 (Deletion)	80565	80625	TGA-------------------------------------------------------------TGA
Lolium_perenne		61 (Deletion)	80565	80625	TGA-------------------------------------------------------------TGA
Deschampsia_antarctica					TGAGTAGTTGTAGGTCCAACTTCGGAAAAGAAAATTTGATAAAACTTTTCGTGCCTAGAGTCATTGA
Puccinellia_nuttalliana					TGAGTAGTTTTAGGTCCAACTTCGGAAAAGAGAATCTGATAAAGCTTTTCTTGCCTAGAGGCATTGA
Dactylis_glomerata					TGAGTAGTTGTAGGTCCAACTTCGGAAAAGAGAATCTGATAAAGCTTTTCTTGCCTAGAGTCATTGA
Kengyilia_melanthera					TGAGTAGTTGTAGGTGCAACTTCGGAAAAGAGAATCTGATAAAGCTTTTCTTGCCTAGAGTCATTGA
Helictochloa_hookeri					AGTTGTGTTGTAGGTCCAACTTCGGAAAAGAAAATCTGATAAAGCTTTTCTTGCCTAGAGTCATTGA
Lamarckia_aurea	41				AAAGCGTGC------AAATTTATCTAATTCCAT-------AATATTTAAA-AATATTAGGGAT
Ventenata_macra					AAAGCGTGC------AAATTTATCTAATTCCAT-------AAT-----AA-AATATTAGGGAT
Scolochloa_festuaceae					AAAGCGTGC------AAATTTCTCTAATTCCAT-------AATATTCAAA-AATATTAGGGAT
Nephelochloa_orientalis					AAAGCGTGC------AAATTTATCTAATTCCAT-------AAT-----AA-AATATTAGGGAT
Holcus_lanatus					AAAGCGTGC------AAATTTTTCTAATTCCAT-------AATATTCCAA-AATATTAGGGAT
Poa_subgen_Stenopoa					AGAGCGTGC------AAATTTCTCTAATTCCATAATATTCAATATTCAAA-AATATTAGGGAT
Festuca_ovina					AAAGCGTGC------AAATTTATCTAATTCCAT-------AATATTTCAA-AATAGTAGGGAT
Desmazeria_sicula					AAAGCGTGC------AAATTTCTCTACAT-----------AATATTCCAA-AATATTAGGGAT
Catapodium_rigidum					AAAGCGTGC------AAATTTATCTACAT-----------AATATTCCTA-AATATTAGGGAT
Catapodium_marinum					AAAGCGTGC------AAATTTATCTACAT-----------AATATTCCTA-AATATTAGGGAT
Castellia_tuberculosa					AAAGCGTGCAAATTTAAATTTATCTAATTCCAT-------AATATTCCAA-AATATTAGGGAT
Ammochloa_palestina					AAAGCTTGC------AAATTTATCTAATTCCAT-------AATATTCCAACAATATTAGGGAT
Alopecurus_arundinaceus					AAAGCGTGC------AAATTTATCTAATTCCAT-------AATATTCCAA-AATATTAGGGAT
Poa_palustris					AGAGCGTGC------AAATTTCTCTAATTCCATAATATTCAATATTCAAA-AATATTAGGGAT
Festuca_ovina_NC_019649					AAAGCGTGC------AAATTTATCTAATTCCAT-------AATATTTCAA-AATAGTAGGGAT
Festuca_altissima		57 (Deletion)	85501	85557	AAA---------------------------------------------------------GAT
Festuca_arundinacea		57 (Deletion)	85501	85557	AAA---------------------------------------------------------GAT
Festuca_pratensis		57 (Deletion)	85501	85557	AAA---------------------------------------------------------GAT
Lolium_multiflorum		57 (Deletion)	85501	85557	AAA---------------------------------------------------------GAT
Lolium_perenne		57 (Deletion)	85501	85557	AAA---------------------------------------------------------GAT
Deschampsia_antarctica					AAAGCGTGC------AAATTTCTCTAATTCCAT-------AATATTCTAA-AATATTAGGGAT
Puccinellia_nuttalliana					AAAGCGTGC------AAATTTCTATAATTCCAT-------CATATTCCAA-AATATTAGGGAT
Dactylis_glomerata					AAAGCGTGC------AAATTTATCTAATTCCAT-------AATATTTTAA-AATATTAGGGAT
Kengyilia_melanthera					AAAGCATG------TAAATTTCTCTAATT-CATAATATTCAAAAATATTACGGTAC---GGAT
Helictochloa_hookeri					AAAGCGTAC------AAATTTCTCTAATTCCATAATATT--------CAAAAATATTAGGCAT
Lamarckia_aurea	42				AGAAAAAGTTAGGTTTTT-------TTTTACTCT----------------------------------------TATTGAATAATGA-ACGGT
Ventenata_macra					AGAAAAAGTTAGG--TTT-------TTTTACTCT----------------------------------------TATTGAAT----A-ATGGT
Scolochloa_festuaceae					AGAAAAAGTTAGG-TTTT-------TTTTACTCT----------------------------------------TATTGAAT----A-ACGGT
Nephelochloa_orientalis					AGAAAAAGTTAGG--TTT-------TTTTATTCT----------------------------------------TATTGAAT----A-----T
Holcus_lanatus					AGAAAAAGTTAGG-TTTT-------TTTTACTCTTATTGAATATTTTTTACTCTTATTGAATATTTTTTACTCTTATTGAAT----A-ATGGT
Poa_subgen_Stenopoa					AGAAAAAGTTAGG-TTTT-------TTTTACTCT----------------------------------------TATTGAAT----ATATGGT
Festuca_ovina					AGAAAAAGTTAGG-TTTT-------TTTTACTC--------T--------------------------------TATTGAAT----A-ACGGT
Desmazeria_sicula					AGAAAAAGTTAGGTTTT--------TTTTACTCT----------------------------------------TATTGAATAACGGTACGGT
Catapodium_rigidum					AGAAAAAGTTAGGTTTTTTTTACTCTTTTACTCT----------------------------------------TATTGAATA-----ACGGT
Catapodium_marinum					AGAAAAAGTTAGGTTTTTTTTACTCTTTTACTCT----------------------------------------TATTGAATA-----ACGGT
Castellia_tuberculosa					AGAAAAAGTTAGG--TTT-------TTTTACTCTTATTGAAT--------------------------------TATTGAAT----A-ACGGT
Ammochloa_palestina					AGAAAAAGTTAGGTTTTT-------TTTTACTCT----------------------------------------TATTGAAT----A-ACGGT
Alopecurus_arundinaceus					AGAAAAAGTTAGG-TTTT-------TTTTACTCT----------------------------------------TATTGAAT----A-AAGGT
Poa_palustris					AGAAAAAGTTAGG-TTTT-------TTTTACTCT----------------------------------------TATTGAAT----ATATGGT
Festuca_ovina_NC_019649					AG-AAAAGTTAGG--TTT-------TTTTACTC--------T--------------------------------TATTGAAT----A-ACGGT
Festuca_altissima					AGAAAAAGTTAGG-TTTT-------TTTTACTCT----------------------------------------TATTGAAT----A-ACGGT
Festuca_arundinacea					CGAAAAAGTTAGG-TTTT-------TTTTACTCTTATTGAA---------------------------------TATTGAAT----A-ACGGT
Festuca_pratensis					CGAAAAAGTTAGG-TTTT-------TTTTACTCTTATTGAA---------------------------------TATTGAAT----A-ACGGT
Lolium_multiflorum					CGAAAAAGTTAGG-TTTT-------TTTTACTCTTATTGAA---------------------------------TATTGAAT----A-ACGGT
Lolium_perenne					CGAAAAAGTTAGG-TTTT-------TTTTACTCTTATTGAA---------------------------------TATTGAAT----A-ACGGT
Deschampsia_antarctica					AGAAAAAGTTAGG--TTT-------TTTTACTCT----------------------------------------TATTGAAT----A-ACGGT
Puccinellia_nuttalliana					AGAAAAAGTGAGG-TTTT-------TTTTACTCT----------------------------------------TATTGAAT----A-ATGGT
Dactylis_glomerata		83 (Deletion)	85589	85671	AGA-----------------------------------------------------------------------------------A-ACGGT
Kengyilia_melanthera					AGAAAAAATTAGGTTTTTTTTTATATTGAATTTGTTAAAACAGAAAAATATAATATATAGTCAAAAAAGAAGATCTAGAATATATCCAGATGTGTGTGTATATTTATCTAAATTCTATATTTATAGATAATGGAATCCTTCTTAAAAAAATATCCTTATTTTTACTCTTATTGAAT-----TGCGGT
Helictochloa_hookeri					AGAAAAAGTTAGGTTTTTTTT-TACT----------------------------------------------------------------------------CTTATTCTTATTGAATA---------------------------------------------------------------ACGGT
Lamarckia_aurea	43				TAAACAGAGTATCCTATTTCCATAGGCTCGAATGACCCCTTCTCATAATAAGAATGTGCACGGTCTGGTCCGGTATG
Ventenata_macra					TAAACAGAGTATCCTATTTCCATAGGCTCGAATGACCCCTTCTCATAATAAGAATGTGCACGGTCTGGTCCGGTATG
Scolochloa_festuaceae					TAAACAGAGTATCCTATTTCCATAGGCTCGAATGACCCCTTCTCATAATAAGAATGTGCACGGTCTGGTCCGGTATG
Nephelochloa_orientalis					TAAACAGAGTATCCTATTTCCATAGGCTCGAATGACCCCTTCTCATAATAAGAATGTGCACGGTCTGGTCCGGTATG
Holcus_lanatus					TAAACAGAGTATCCTATTTCCATAGGCTTGAATGACCCCTTCTCATAATAAGAATGTGCACGGTCTGGTCCGATATG
Poa_subgen_Stenopoa					TAAACAGAGTAGCCTATTTCCATAGGCTCGAATGACCCCTTCTCATAATAAGAATGTGCACGGTCTGGTCCGGTATG
Festuca_ovina		71 (Deletion)	93611	93681	TAA-----------------------------------------------------------------------ATG
Desmazeria_sicula					TAAACAGAGTATCCTATTTCCATAGGCTCGAATGACCCCTTCTCATAATAAGAATGTGCACGGTCTGGTCCGGTATG
Catapodium_rigidum					TACACAGAGTATCCTATTTCCATAGGCTCGAATGACCCCTTCTCATAATAAGAATGTGCACGGTCTGGTCCGGTATG
Catapodium_marinum					TACACAGAGTATCCTATTTCCATAGGCTCGAATGACCCCTTCTCATAATAAGAATGTGCACGGTCTGGTCCGGTATG
Castellia_tuberculosa		71 (Deletion)	93611	93681	TAA-----------------------------------------------------------------------ATG
Ammochloa_palestina					TAAACAGAGTATCCTATTTCCATAGGCTCGAATGACCCCTTCTCATAATAAGAATGTGCACGGTCTGGTCCGGTATG
Alopecurus_arundinaceus					TAAACAGAGTATCCTATTTCCATAGGCTCGAATGACCCCTTCTCATAATAAGAATGTGCACGGTCTGGTCCGGTATG
Poa_palustris					TAAACAGAGTAGCCTATTTCCATAGGCTCGAATGACCCCTTCTCATAATAAGAATGTGCACGGTCTGGTCCGGTATG
Festuca_ovina_NC_019649		71 (Deletion)	93611	93681	TAA-----------------------------------------------------------------------ATG
Festuca_altissima		71 (Deletion)	93611	93681	TAA-----------------------------------------------------------------------ATG
Festuca_arundinacea		71 (Deletion)	93611	93681	TAA-----------------------------------------------------------------------ATG
Festuca_pratensis		71 (Deletion)	93611	93681	TAA-----------------------------------------------------------------------ATG
Lolium_multiflorum		71 (Deletion)	93611	93681	TAA-----------------------------------------------------------------------ATG
Lolium_perenne		71 (Deletion)	93611	93681	TAA-----------------------------------------------------------------------ATG
Deschampsia_antarctica					TAAACAGAATATCCTATTTCCATAGGCTCGAATGACCCCTTCTCATAATAAGAATGTGCACGGTCTGGTCCGGTATG
Puccinellia_nuttalliana					TAAACAGAGTATCCTATTTCCATAGGCTCGAATGACCCCTTCTCATAATAAGAATGTGCACGGTCTGGTCCGGTATG
Dactylis_glomerata					TAAACAGAGTATCCTATTTCCATAGGCTCGAATGACCCCTTCTCATAATAAGAATGTGCACGGTCTGGTCCGGTATG
Kengyilia_melanthera					TAAACAGAGTATCCTATTTCCATAGGCTCGAATGACCCCTTCTCATAATAAGAATGTGCACGGTCTGGTTCGGTATG
Helictochloa_hookeri					TAAACAGAGTATCCTATTTCCATAGGCTCGAATGACTCCTTCTCATAATAAGAATGTGCACGGTCTGGTCCGGTATG
Lamarckia_aurea	44				GCGTGGAAACAGATAGAAACTCTTGAATGGAAATTTAAAAGAAATGTAGCCCCAGTTCCTTCGGAAATGGTAAGATCTTTGGCGCAAGAAGAAGGGGCGACCCATATCATCTTGACTTGGTTCTGCTTCCCCTCTTTTTTTAAGAATACCGAGTCGGGTTCTTCTCCTACCAGTATCGAATAGAACATGCTGAACAAGATCTTCTTCATGG
Ventenata_macra					GCGTGGAAACAGATAGAAATTCTTGAATGGAAATTGAAAAGAAATGTAGCCCCAGTTCCTTCGGAAATGGTAAGATCTTTGGCGCAAGAAGAAGGGGCGACCCATATCATCTTGACTTGGTTCTGCTTCCCCTCTTTTTTTAAGAATACCGAGTCGGGTTCTTCTCCTACCAGTATCGAATAGAACATGCTGAACAAGATCTTCTTCATGG
Scolochloa_festuaceae					GCGTGGAAACAGATAGAAACTCTTGAATGGAAATTGAAAAGAAATGTAGCCCCAGTTCCTTCGGAAATGGTAAGATCTTTGGCGCAAGAAGAAGGGGCGACCCATATCATCTTGACTTGGTTCTGCTTCCCCTCTTTTTTTAAGAATACCGA---------------------TATTGAATAGAACATGCTGAACAAGATCTTCTTCATGG
Nephelochloa_orientalis					GCGTGGAAACAGATAGAAATTCTTGAATGGAAATTGAAAAGAAATGTAGCCCCAGTTCCTTCGGAAATGGTAAGATCTTTGGCGCAAGAAGAAGGGGCGACCCATATCATCTTGACTTGGTTCTGCTTCCCCTCTTTTTTTAAGAATACCGAGTCGGGTTCTTCTCCTACCAGTATCGAATAGAACATGCTGAACAAGATCTTCTTCATGG
Holcus_lanatus					GCGTGGAAACAGATAGAAACTCTTGAATGGAAATTGAAAAGAAATGTAGCCCCAGTTCCTTCGGAAATGCTAAGATCTTTGGCGCAAGAAGAAGGGGCGACCCATATCATCTTGACTTGGTTCTGCTTCCCCTCTTTTTTTAAGAATACCGAGTCGGGTTCTTCTCCTACCAGTATCGAATAGAACATGCTGAACAAGATCTTCTTCATGG
Poa_subgen_Stenopoa					GCGTGGAAACAGATAGAAATTCTTGAATGGAAATTGAAAAGAAATGTAGCCCCAGTTCCTTCGGAAATGGTAAGATCTTTGGCGCAAGAAGAAGGGGCGACCCATATCATCTTGACTTGGTTCTGCTTCCCCTCTTTTTTTAAGAATACCGAGTCGGGTTCTTCTCCTACCAGTATCGAATAGAACATGCTGAACAAGATCTTCTTCATGG
Festuca_ovina		205 (Deletion)	99000	99204	GCG-------------------------------------------------------------------------------------------------------------------------------------------------------------------------------------------------------------TGG
Desmazeria_sicula					GCGTGGAAACAGATAGAAACTCTTGAATGGAAATTGAAAAGAAATGTAGCCCCAGTTCCTTCGGAAATCGTAAGATCTTTGGCGCAAGAAGAAGGGGCGATCCATATCATCTTGACTTGGTTCTGCTTCCCCTCTTTTTTTAAGAATACCGAGTCGGGTTCTTCTCCTACCAGTATCAAATAGAACATGCTGAACAAGATCTTCTTCATGG
Catapodium_rigidum					GCGTGGAAACAGATAGAAACTCTTGAATGGAAATTGAAAAGAAATGTAGCCCCAGTTCCTTCGGAAATCGTAAGATCTTTGGCGCAAGAAGAAGGGGCGATCCATATCATCTTGACTTGGTTCTGCTTCCCCTCTTTTTTTAAGAATACCGAGTCGGGTTCTTCTCCTACCAGTATCAAATAGAACATGCTGAACAAGATCTTCTTCATGG
Catapodium_marinum					GCGTGGAAACAGATAGAAACTCTTGAATGGAAATTGAAAAGAAATGTAGCCCCAGTTCCTTCGGAAATCGTAAGATCTTTGGCGCAAGAAGAAGGGGCGATCCATATCATCTTGACTTGGTTCTGCTTCCCCTCTTTTTTTAAGAATACCGAGTCGGGTTCTTCTCCTACCAGTATCAAATAGAACATGCTGAACAAGATCTTCTTCATGG
Castellia_tuberculosa		205 (Deletion)	99000	99204	GCG-------------------------------------------------------------------------------------------------------------------------------------------------------------------------------------------------------------TGG
Ammochloa_palestina					GCGTGGAAACAGATAGAAACTCTTGAATGGAAATTGAAAAGAAATGTAGCCCCAGTTCCTTCGGAAATGGTAAGATCTTTGGCGCAAGAAGAAGGGGCGACCCATATCATCTTGACTTGGTTCTGCTTCCCCTCTTTTTTTAAGAATACCGAGTCGGGTTTTTCTCCTACCAGTATCGAATAGAACATGCTGAACAAGATCTTCTTCATGG
Alopecurus_arundinaceus					GCGTGGAAACAGATAGAAATTCTTGAATGGAAATTGAAAAGAAATGTAGCCCCAGTTCCTTCGGAAATGGTAAGATCTTTGGCGCAAGAAGAAGGGGCGACCCATATCATCTTGACTTGGTTCTGCTTCCCCTCTTTTTTTAAGAATACCGAGTCGGGTTCTTCTCCTACCAGTATCGAATAGAACATGCTGAACAAGATCTTCTTCATGG
Poa_palustris					GCGTGGAAACAGATAGAAATTCTTGAATGGAAATTGAAAAGAAATGTAGCCCCAGTTCCTTCGGAAATGGTAAGATCTTTGGCGCAAGAAGAAGGGGCGACCCATATCATCTTGACTTGGTTCTGCTTCCCCTCTTTTTTTAAGAATACCGAGTCGGGTTCTTCTCCTACCAGTATCGAATAGAACATGCTGAACAAGATCTTCTTCATGG
Festuca_ovina_NC_019649		205 (Deletion)	99000	99204	GCG-------------------------------------------------------------------------------------------------------------------------------------------------------------------------------------------------------------TGG
Festuca_altissima					GCGTGGAAACAGATAGAAACTCTTGAATGGAAATTGAAAAGAAATGTAGCCCCAGTTCCTTCGGAAATGGTAAGATCTTTGGCGCAAGAAGAAGGGGCGACCCATATCATCTTGACTTGGTTCTGCTTCCCCTCTTTTTTTAAGAATACCGAGTCGGGTTCTTCTCCTACCAGTATCGAATAGAACATGCTGAACAAGATCTTCTTCATGG
Festuca_arundinacea					GCGTGGAAACAGATAGAAACTCTTGAATGGAAATGGAAAAGAAATGTAGCCCCAGTTCCTTCGGAAATGGTAAGATCTTTGGCGCAAGAAGAAGGGGCGACCCATAGCATCTTGACTTGGTTCTGCTTCCCCTCTTTTTTTAAGAATACCGAGTCGGGTTCTTCTCCTGCCAGTATCGAATAGAACATGCTGAACAAGATCTTCTTCATGG
Festuca_pratensis					GCGTGGAAACAGATAGAAACTCTTGAATGGAAATGGAAAAGAAATGTAGCCCCAGTTCCTTCGGAAATGGTAAGATCTTTGGCGCAAGAAGAAGGGGCGACCCATAGCATCTTGACTTGGTTCTGCTTCCCCTCTTTTTTTAAGAATACCGAGTCGGGTTCTTCTCCTGCCAGTATCGAATAGAACATGCTGAACAAGATCTTCTTCATGG
Lolium_multiflorum					GCGTGGAAACAGATAGAAACTCTTGAATGGAAATGGAAAAGAAATGTAGCCCCAGTTCCTTCGGAAATGGTAAGATCTTTGGCGCAAGAAGAAGGGGCGACCCATAGCATCTTGACTTGGTTCTGCTTCCCCTCTTTTTTTAAGAATACCGAGTCGGGTTCTTCTCCTGCCAGTATCGAATAGAACATGCTGAACAAGATCTTCTTCATGG
Lolium_perenne					GCGTGGAAACAGATAGAAACTCTTGAATGGAAATGGAAAAGAAATGTAGCCCCAGTTCCTTCGGAAATGGTAAGATCTTTGGCGCAAGAAGAAGGGGCGACCCATAGCATCTTGACTTGGTTCTGCTTCCCCTCTTTTTTTAAGAATACCGAGTCGGGTTCTTCTCCTGCCAGTATCGAATAGAACATGCTGAACAAGATCTTCTTCATGG
Deschampsia_antarctica					GCGTGGAAACAGATAGAAACTCTTGAATGGAAATTGAAAAGAAATGTAGCCCCAGTTCCTTCGGAAATGGTAAGATCTTTGGCGCAAGAAGAAGGGGCGACCCATATCATCTTGACTTGGTTCTGCTTCCCCTCTTTTTTTAAGAATACCGAGTCGGGTTCTTCTCCTACCAGTATCGAATAGAACATGCTGAACAAGATCTTCTTCATGG
Puccinellia_nuttalliana					GCGTGGAAACAGATAGAAACTCTTGAATGGAAATTGAAAAGAAATGTAGCCCCAGTTCCTTCGGAAATGGTAAGATCTTTGGCGCAAGAAGAAGGGGCGACCCATATCATCTTGACTTGGTTCTGCTTCCCCTCTTTTTTTAAGAATACCGAGTCGGGTTCTTCTCCTACCAGTATCGAATAGAACATGCTGAACAAGATCTTCTTCATGG
Dactylis_glomerata					GCGTGGAAACAGATAGAAACTCTTGAATGGAAATTGAAAAGAAATGTAGCCCCAGTTCCTTCGGAAATGGTAAGATCTTTGGCGCAAGAAGAAGGGGCGACCCATATCATCTTGACTTGGTTCTGCTTCCCCTCTTTTTTTAAGAATACCGAGTCGGGTTCTTCTCCTACCAGTATCGAATAGAACATGCTGAACAAGATCTTCTTCATGG
Kengyilia_melanthera					GCGTGGAAACAGATAGAAACTCTTGAATGGAAATTGAAAAGAAATGTAGCCCCAGTTCCTTCGGAAATGGTAAGATCTTTGGCGCAAGAAGAAGGGGCGACCCATATCATCTTGACTTGGTTCTGCTTCCCCTCTTTTTTTAAGAATACCGAGTCGGGTTCTTCTCCTACCAGTATCGAATAGAACATGCTGAACAAGATCTTCTTCATGG
Helictochloa_hookeri					GCGTGGAAACAGATAGAAACTCTTGAATGGAAATTGAAAAGAAATGTAGCCCCAGTTCCTTCGGAAATGGTAAGATCTTTGGCGCAAGAAGAAGGGGCGACCCATATCATCTTGACTTGGTTCTGCTTTCCCTCTTTTTTTAAGAATACCGAGTCGGGTTCTTCTCCTACCAGTATCGAATAGAACATGCTGAACAAGATCTTCTTCATGG
Lamarckia_aurea	45	52 (Deletion)	108249	108300	AAT----------------------------------------------------ATC
Ventenata_macra					AATTTGGTTATATCATGGACTCAAAAAACGGATCCGAATTTGACTGAAATGCACGATC
Scolochloa_festuaceae					AATTTGGTTATATCATGGACTCAAAAAACGGATCCGAATTTGACTGAAATGCACGATC
Nephelochloa_orientalis					AATTTGGTTATATCATGGACTCAAAAAACGGATCCGAATTTGACTGAAATGCACGATC
Holcus_lanatus					AATTTGGTTATATCATGGACTCAAAAAACGGATCCGAATTTGACTGAAATGCACGATC
Poa_subgen_Stenopoa					AATTTGGTTATATCATGGACTCAAAAAACGGATCCGAATTTGACTGAAATGCACGATC
Festuca_ovina					AATTTGGTTATATCATGGACTCAAAAAACGTATCCGAATTTGACTGAAATGCACGATC
Desmazeria_sicula					AATTTGGTTATATCATGGACTCAAAAAACGGATCCGAATTTGACTGAAATGCACAATC
Catapodium_rigidum					AATTTGGTTATATCATGGACTCAAAAAACGGATCCGAATTTGACTGAAATGCACAATC
Catapodium_marinum					AATTTGGTTATATCATGGACTCAAAAAACGGATCCGAATTTGACTGAAATGCACAATC
Castellia_tuberculosa					AATTTGGTTATATCATGGACTCAAAAAACGGATCCGAATTTGACTGAAATGCACGATC
Ammochloa_palestina					AATTTGGTTATATCATGGACTCAAAAAACGGATCCGAATTTGACTGAAATGCACGATC
Alopecurus_arundinaceus					AATTTGGTTATATCATGGACTCAAAAAACGGATCCGAATTTGACTGAAATGCACGATC
Poa_palustris					AATTTGGTTATATCATGGACTCAAAAAACGGATCCGAATTTGACTGAAATGCACGATC
Festuca_ovina_NC_019649					AATTTGGTTATATCATGGACTCAAAAAACGGATCCGAATTTGACTGAAATGCACGATC
Festuca_altissima					AAT----TTATATCATGGACTCAAAAAACGGATCCGAATTTGACTGAAATGCACGATC
Festuca_arundinacea					AAT----TTATATCATGGACTCAAAAAACGGATCCGAATTTGACTGAAATGCACGATC
Festuca_pratensis					AAT----TTATATCATGGACTCAAAAAACGGATCCGAATTTGACTGAAATGCACGATC
Lolium_multiflorum					AAT----TTATATCATGGACTCAAAAAACGGATCCGAATTTGACTGAAATGCACGATC
Lolium_perenne					AAT----TTATATCATGGACTCAAAAAACGGATCCGAATTTGACTGAAATGCACGATC
Deschampsia_antarctica					AATTTGGTTA----------TCAAAAAACGGATCCGAATTTGACTGAAATGCACGATC
Puccinellia_nuttalliana					AATTTGGTTATATCATGGACTCAAAAAACGGATCCGAATTTGACTGAAATGCACGATC
Dactylis_glomerata		52 (Deletion)	108249	108300	AAT----------------------------------------------------ATC
Kengyilia_melanthera					AATTTGGTTATATTATATCATGGACTCGAAAAACGGATCTGAATTTGACTGAAATGCACGATC
Helictochloa_hookeri					AATTTGG-----TTATATCATGGACTCAAAAAACGGATCCGAATTTGACTGAAATGCACGATC
Lamarckia_aurea	46				GGAAAACCGAACTAT-------------------TATACAATACTTACCTTAGTAGAGCAGTAGATAACACGATAGTAGAGAGTAGAGCAGGGAGATA
Ventenata_macra					GGAAAACCAAATAGA------------------------------------------------------------------GGAAGAGGAGGGAGATA
Scolochloa_festuaceae					GGAAAACCGATAAAT--------------------------------------------AGTA-------------GATAG--TAGAGGAGGGAGATA
Nephelochloa_orientalis					GGAAAACCGAATAGA------------------------------------------------------------------GGAAGAGGAGGGAGATA
Holcus_lanatus					GGAAAACCGAACTAT--------------------------------------------TATAGTAGAAAGAATAGTAGAAAGTATAAGAGGGAGATA
Poa_subgen_Stenopoa					GGAAAACCGAACTAT-------------------------------------------------------------TATACAATACTTAAGGAAGATA
Festuca_ovina		83 (Deletion)	109787	109869	GGA-----------------------------------------------------------------------------------AAGAGGTAGATA
Desmazeria_sicula					GGAAAACCGAACTAT--------------------------------------------------TATACAATACTTACCTTATG-----------TA
Catapodium_rigidum					AGAAAACCGAACTAT--------------------------------------------------TATACAATACTTACCTTATGTAACACGGAAATA
Catapodium_marinum					AGAAAACCGAACTAT--------------------------------------------------TATACAATACTTACCTTATGTAACACGGAAATA
Castellia_tuberculosa		80 (Deletion)	109787	109866	GGA--------------------------------------------------------------------------------AAGAAGAAGTAGATA
Ammochloa_palestina					GGAAAACCGATATAG-------------------AATATAGTATTC----TAGTA-AGTAGAAGATATAGTATATAGTCGAAGTAGAGGAGGGGTATA
Alopecurus_arundinaceus					GGAAAACCGAATAGAGGAAGAGGAGGGAGATATAGAGGGAAGAGGAGGGAGATATAGAGGGAAGAGGAGGGAGATATAGAGGGAAGAGGAGGGAGATA
Poa_palustris					GGAAAACCGAACTAT-------------------------------------------------------------TATACAATACTTAAGGGAGATA
Festuca_ovina_NC_019649		83 (Deletion)	109787	109869	GGA-----------------------------------------------------------------------------------AAGAGGTAGATA
Festuca_altissima					GGAAA------------------------------------------------------------------------AAAG--TAGAGGAAGTAGATA
Festuca_arundinacea					GGAAAAC------AG--------------------------------------------AAGG-------------TAGAG--TGGAGGAAGTAGATA
Festuca_pratensis					GGAAAAC------AG--------------------------------------------TAGG-------------TAGAG--TAGAGGAAGTAGATA
Lolium_multiflorum					GGAAAAC------AG--------------------------------------------TAGG-------------TAGAG--TAGAGGAAGTAGATA
Lolium_perenne					GGAAAAC------AG--------------------------------------------TAGG-------------TAGAG--TAGAGGAAGTAGATA
Deschampsia_antarctica					GGAAAACCGAACTAT--------------------------------------------TATA-------------CAATACTTACCTTATGTAACAC
Puccinellia_nuttalliana					GGAAAATAAATGGAA-------------------------------------------------------AATAAATAATAAATAATAGAGGAGAGAA
Dactylis_glomerata					GGAAAA--------------------------------------------TAGTAGAGCAGTAGATAA-----------ATAGTAGAGCAGGGAGATA
Kengyilia_melanthera					GGAAAACCGAACTAT--------------------------------------------------TATACAATACTTACCTTATGTAACAAGGTTAC-
Helictochloa_hookeri					GGAAAACC----------AAAAAAAAAGAATAT------------------------------------------------AGTAGAGGAGGAAGATA
Lamarckia_aurea	47	292 (Deletion)	112429	112720	TAA----------------------------------------------------------------------------------------------------------------------------------------------------------------------------------------------------------------------------------------------------------------------------------------------------TTA
Ventenata_macra					AAATAAAGTTAATCAAATAACTTCGTTACCTAGTTATTACCTAAATAAGGATATTTATTAAAATAAAAAAAAAAAAGGTTAC----ATTTTTTTTACTTT-CTATTAAT----TTTTATATCTCTTTAAAACAAAGATGAAGCAGCTCTCTTGTTTCGTAACTGATTAATTGAATTTTTTTAAAAAGAAAAACCA------------------TGTTTATAATAAATTATAAAATAATCATTACTTCATA--------TAGAACTGAAATCCTAATGACTATAATTAACTAAGTTTTA
Scolochloa_festuaceae					AAA-AAAGTTAATCAAATAACTTCGTTACCTAGTTATTACCTAAATAAGGATATTTATTAAAAT--AA-AAAAAAAGGTTGC----A-TTTTTTTACTTT-CTATTAAT----TTTGATATTTCTTTAAAACAAAGATGAAGCAGCTCTCTTGTTTCGTAACTGATTAATTGAATTCCAATAAAAAGAAAACCCA------------------TGTTTATAAGAAATTATCAAATAGTCGTTACTTCATA--------TAGAACTGAAATCCTAATGACTATAATTACCTAAGTTTTA
Nephelochloa_orientalis					AAATAAAGTTAATCAAATAACTTCGTTACCTAGTTATTACCTAAAAAAGGATATTTATTAAAAT--ACAAAAAAAAGGTTAC----A-TTTTTTTACTTT-CTATTAAT----TTTTATATCTCTTTAAAACAAAGATGAAGCAGCTCTCTTGTTTCGTAACTGATTAATTAAATTCCAATAAAAAGAAAAACCA------------------TGTTTATAAGAAATTATAAAATAATCATT-------------------------------------------------AGTTTTA
Holcus_lanatus					AAA-AAAGTTAATCAAATAACTTCGTTACCTAGTTATTACCTAAATAAGGATATTTATTAAAAT--AC-AAAAAAAGGTTGC----A-TTTTTTTACTTT-CTATTAAT----TTTGATATTTCTTTAAAACAAAGATGAAGCAGCTCTCTTGTTTCGTAACTGATTAATTGAATTCCAATAAAAAGAAAACCCA------------------TGTTTATAAGAAATTATCAAATAGTCCTTACTTCATA--------TAGAACTGAAATCCTAATGACTATAATTACCTAAGTTTTA
Poa_subgen_Stenopoa					AAA-AAAGTTAATCAAATAACTTCGTTACCTAGTTATTACCTAAATAAGGATATTTATTAAAAT--AC-AAAAAAAGGTTGC----A-TTTTTTTACTTT-CTATTAAT----TTGGATATTTCTTTAAAACAAAGATGAAGCAGCTCTCTTGCTTCGTAACTGATTAATTGAATTCCAATAAAAAGAAAACCCA------------------TGTTTCTAAGAAATTAGCAAATAGTCATTACTTCATA--------TAGAACTGAAATTCTAA-----------------------
Festuca_ovina					TAA-AAAGTTAATAAAATAACTTCGTTACCTAGTTATTACCTAAATAAGGATATTTATTAAAAT--AC-AAAAAAAGGTTGC----A-TTTTTTTACTTT-CTATTAAT----TTTGATATTTCTTTAAAACAAAGATGAAGCAGCTCTCTTGTTTCATAACTGATTAATTGAATTCCAATAAAAAGAAAACCTA------------------TGTTTATAAGAAATTATCAAATAGTCGTTACTTCATA--------TAGAACTGAAATCCTAATGACTATAATTACCTAAGTTTTA
Desmazeria_sicula					AAA-AAAGTTAATCAAATAACTTCGTTACCTAGTTATTACCTAAATAAGGATATTTATTAAAAT--AA-AAAACAAAGTTAC----A-TTTTTTTACTTT-CTATTAAT----TTTGATATTTCTTTAAAACAAACATGAACCAGCTCTCTTGTTTCGTAACTGATTAATTGAATTCCAATAAAAAGAAAACCA-------------------TGTTTATAAGAAATTATAAAATAGTCATTACTTCAAT-------ATAGAACTGAAATCCTAATGACTATAATTACCTAAGTTTTA
Catapodium_rigidum					AAATAAAGTTAATCAAAAAACTTCGTTACCTAGTTATTACCTAAATAAGGATATTTATTAAAAT--AA-AAA--AAAGTTAC----A-TTTTTTTACTTT-CTATTAAT----TTTGATATTTCTTTAAAACAAACATGAACCAGCTCTCTTGTTTCGTAACTGATTAATTGAATTCCAATAAAAAGAAAACCA-------------------TGTTTATAAAAAATTATAAAATAGTCATTATTTCAAT-------ATAGAACTGAAATCCTAATGACTATAATTACCTAAGTTTTA
Catapodium_marinum					AAATAAAGTTAATCAAAAAACTTCGTTACCTAGTTATTACCTAAATAAGGATATTTATTAAAAT--AA-AAA--AAAGTTAC----A-TTTTTTTACTTT-CTATTAAT----TTTGATATTTCTTTAAAACAAACATGAACCAGCTCTCTTGTTTCGTAACTGATTAATTGAATTCCAATAAAAAGAAAACCA-------------------TGTTTATAAAAAATTATAAAATAGTCATTATTTCAAT-------ATAGAACTGAAATCCTAATGACTATAATTACCTAAGTTTTA
Castellia_tuberculosa					TTA-AAAGTTAATAAAATAACTTCGTTACCTAGTTATTACCTAAATAAGGATATTTATTAAAAT--AC-AAAAAAAGGTTGC----A-TTTTTTTACTTT-CTATTAAT----TTTGCTATTTCTTTAAAACAAGGATGAAGTAGCTCTCTTGTTTCGTAACTGATGAATTGAATTCCAATAAAAAGAAAACCTA------------------TGTTTATAAGAAATTATCAAATAGTCGTTACTTCATA--------TAGAACTGAAATCCTAATGACTATAATTACCTAAGTTTTA
Ammochloa_palestina					TTA-AAAGTTAATCAAAGAACTTCGTTACCTAGTTATTATCTAAATAAGGATATTTATTAAAAT--GC-AAAAAAAGGTTGCATTTTTTTACTTTCTATTAATTTTGTTTAATTTTGATATTTCTTTAAAACAAAGACGAAGCAGCTCTCTTGTTTTGTAACTGATTAATTGAATTCAAATAAAAAGAAAATCCA------------------TGTTTATAAGAAATTCTCAAATAGTCGTTACTTCATATAGAAATCTAGAAATGAAATCCTAATGACTATAATTACCTAAATTTTA
Alopecurus_arundinaceus					AAATAAAGTTAATCAAATAACTTCGTTACCTAGTTATTACCTAAATAAGGATATTTATTAAAAT--ACAAAAAAAAGGTTAC----A-TTTTTTTACTTT-CTATTAATTTTGTTTGATATCTCTTTAAAACAAAGATGAAGCAGCTCTCTTGTTTCGTAACTGATTAATTGAATTCCAATAAAAATAAAACCCA------------------TGTTTATAAGAAATTATAAAATAGTAATTACTTCATA--------TAGAACTTAAATCCTAATGACTATAATTACCTAAGTTTTA
Poa_palustris					AAA-AAAGTTAATCAAATAACTTCGTTACCTAGTTATTACCTAAATAAGGATATTTATTAAAAT--ACAAAAAAAAGGTTGC----A-TTTTTTTACTTTACTATTAAT----TTGGATATTTCTTTAAAACAAAGATGAAGCAGCTCTCTTGCTTCGTAACTGATTAATTGAATTCCAATAAAAAGAAAACCCA------------------TGTTTCTAAGAAATTAGCAAATAGTCATTACTTCATA--------TAGAACTGAAATTCTAATGACTATAATTACCTAAGTTTTA
Festuca_ovina_NC_019649					TAA-AAAGTTAATAAAATAACTTCGTTACCTAGTTATTACCTAAATAAGGATATTTATTAAAAT--AC-AAAAAAAGGTTGC----A-TTTTTTTACTTT-CTATTAAT----TTTGCTATTTCTTTAAAACAAAGATGAAGCAGCTCTCTTGTTTCATAACTGATTAATTGAATTCCAATAAAAAGAAAACCCA------------------TGTTTATAAGAAATTATCAAATAGTCGTTACTTCATA--------TAGAACTGAAATCCTAATGACTATAATTACCTAAGTTTTA
Festuca_altissima					AAA-AAAGTTAATCAAATAACTTCGTTACCTAGTTATTACCTAAATAAGGATATTTATTAAAAT--AC-AAAAAAAGGTTGC----A-TTTTTTTACTTT-CTATTAAT----TTGGATATTTCTTTAAAACAAAGATGAAACAGCTCTCTTGTTTCGTAACTGATTAATGGAATTCCAATAAAAAGAAAACCCA------------------TGTTTATAAGAAATTATCAAATAGTCATTACTTCATA--------TAGAACTGAAATCCTAATGACTATAATTACCTAAGTTTTA
Festuca_arundinacea					AAA-AAAGTTAATCAAATAACTTCGTTACCTAGTTATTACCTAAATAAGGATATTTATTAAAATAAAA-AAAAAAAGGTTGC----A-TTTTTTTACTTT-CTATTAAT----TTTTATATTTCTTTAAAACAAAGATGAAACAGCTCTCTTGTTTCGTAACTGATTAATGGAATTCCAATAAAAAGAAAACCCA------------------TGTTTATAATAAATTATCAAATAGTCGTTACTTCATA--------TAGAACTGAAATCCTAATGACTATAATTACCTAAGTTTTA
Festuca_pratensis					AAA-AAAGTTAATCAAATAACTTCGTTACCTAGTTATTACCTAAATAAGGATATTTATTAAAAT--AA-AAAAAAAGGTTGC----A-TTTTTTTACTTT-CTATTAAT----TTTGATATTTCTTTAAAACAAAGATGAAACAGCTCTCTTGTTTCGTAACTGATTAATGGAATTCCAATAAAAAGAAAACCCA------------------TGTTTATAATAAATTATCAAATAGTCGTTACTTCATA--------TAGAACTGAAATCCTAATGACTATAATTACCTAAGTTTTA
Lolium_multiflorum					AAA-AAAGTTAATCAAATAACTTCGTTACCTAGTTATTACCTAAATAAGGATATTTATTAAAAT-AAA-AAAAAAAGGTTGC----A-TTTTTTTACTTT-CTATTAAT----TTTGATATTTCTTTAAAACAAAGATAAAACAGCTCTCTTGTTTTGTAACTGATTAATCGAATTCCAATAAAAAGAAAACCCA------------------TGTTTATAATAAATTATCAAATAGTCGTTACTTCATA--------TAGAACTGAAATCCTAATGACTATAATTACCTAAGTTTTA
Lolium_perenne					AAA-AAAGTTAATCAAATAACTTCGTTACCTAGTTATTACCTAAATAAGGATATTTATTAAAAT--AA-AAAAAAAGGTTGC----A-TTTTTTTACTTT-CTATTAAT----TTTGATATTTCTTTAAAACAAAGATGAAACAGCTCTCTTGTTTTGTAACTGATTAATCGAATTCCAATAAAAAGAAAACCCA------------------TGTTTATAATAAATTATCAAATAGTCGTTACTTCATA--------TAGAACTGAAATCCTAATGACTATAATTACCTAAGTTTTA
Deschampsia_antarctica					AAA-AAAGTTAATCAAATAACTTCGTTACCTAGTTATTACCTAAATAAGGATATTTATTAAAATAAAA-AAATTTAAAATACAAAAA-AAGGTTTACTTT-CTATTAAT----TTTGATATTTCTTTAAAACAAAGATAAAGCAGCTCTCTTGTTTCGTAACTCATTAATTGAATTCCAATAAAAAGAAAACCCA------------------TGTTTATAATAAATTATAAAATAGTCGTTACTTCATA--------TAGAACTGAAATCCTAATGACTATAATTACCTAAGTTTTA
Puccinellia_nuttalliana					TAA-AAAGTTAATAAAATAACTTCGTTACCTAGTTATTACCTAAATAAGGATATTTATTAAAAT--AC-AAAAAAAGGTTGC----A-TTTTTTTACTTT-CTATTAAT----TTTGATATTTATTTAAAACAAAGATGAAGCAGCTCTCTTGTTTCGTAACTTATTAATTTAATTCCAATAAAAAGAAAACCCATGCGTGTTTATAAATGCGTGTTTATAATAAATTATCAAATAGTCGTTACTTCATA--------TAGAACTGAAATCCTAATGACTATAATTACCTAAGTTTTA
Dactylis_glomerata		292 (Deletion)	112429	112720	TAA----------------------------------------------------------------------------------------------------------------------------------------------------------------------------------------------------------------------------------------------------------------------------------------------------TTA
Kengyilia_melanthera					CAA-AAAGGTAATCAAATAACTTCGTTACCTAGTTATTTGATTACCTAAATAAAGATATTTATAAAAAT----AAAAAAAAAGTTGAATCATTTTACTT---TCTATTCATAATTCATTTTTATATTTCTTTAAAACAAAGATGAAACAGCTCTCTTGTTCCATAATTAACTGATTGAGTGAATTCCAATGA-----------------------AAACCTATGTTTATAAGAAATTATCGAATAGTCCTTACTTC--------ATATAGAACTAAAATCCTAATGACTATAAATTACCTAAGTTTTA
Helictochloa_hookeri					AAA-AAAGTTAATCAAATAACTTTGTTACCTAGTT-----ATTACCTAAATAAGGATATTTATTAAAATA---CAAAAAAAGGTTGCA-----TTTTTTTACTT-------------------TATTTCTTTAAAACAAAAATGAAGTAGCTCTCTTGTTTCG----TAACTGATTAATCGAATTCCAATAAAAAA-----------------------CCGTGTTTATAAGAAATTATCAAATAGTCGTTACTTCATATAG--------AACTGAAATCCTAATGACTAT-AATTACCTAAGTTTTA
Lamarckia_aurea	48				C-AAAGTATAAAAAATATACGGA------------AAAGGAAAAATTTTTAAAA------AATTC-------------------TTGTCTTATCCGGATTAGATAAGAATTTAAGTAAAAAATAATTCAGAA
Ventenata_macra		77 (Deletion)	113091	113167	TGAAAGTTTAAAATATAT-----------------ACGGAAAAAATAACTCA-----------------------------------------------------------------------------GAA
Scolochloa_festuaceae					C-AAAGTATAAAATATAT-----------------ACGGAAAAAATTTTACTGA------AATTC-------------------TTGTCTTATCCGGATAAGACAAGAATTTCAGTAAAAAATAATTCAGAA
Nephelochloa_orientalis		72 (Deletion)	113096	113167	CGAAAGTTTAAAATATAT-----------------ACGGAAAAAATAACTCAGAATT------------------------------------------------------------------------GAA
Holcus_lanatus					C-AAAGTATAAAATATATTATAT-----------ACGAAAAAAAAATTTACTGA------AATTC-------------------TTGTATTATCCGTATTAGACAAGAATTTCAGTAAAAAATAATTCAGAA
Poa_subgen_Stenopoa					C-AAAGTATAAAATATAT-----------------ACATAAAAAAATTTTTAAAATTCTTGTCTT-------------------ATGTCTTATCCGGATTAGACAA-AATTTAAGTAAAAAATAATTCAGAA
Festuca_ovina					C-AAAGTATAAAATATATACATA-----AAAAAATTTTTAAAATTCTTGTCTTATGTCTTATCTC-------------------TTGTCTTATCCGGATAAGACAAGAGTTTAAGTAAAAAATAATTCAGAA
Desmazeria_sicula					C-AAAGTATAAAATATAT-----------------ACGGAAAATAAATTTGA--------AATTC-------------------TTGTCTTATCCGGATTAGACAAGAATTTAAGTAAAAAATAATTCAGAA
Catapodium_rigidum					C-AAAGTATAAAATATAT-----------------ACGGAAAATAAATTTGA--------AATTC-------------------TTGTCTAATCCGGATTAGACAAGAATTTAAGTAAAAAATAATTCAGAA
Catapodium_marinum					C-AAAGTATAAAATATAT-----------------ACGGAAAATAAATTTTA--------AATTC-------------------TTGTCTAATCCGGATTAGACAAGAATTTAAGTAAAAAATAATTCAGAA
Castellia_tuberculosa					C-AAAGTATAAAATATATATATATACGTAAAATATACGGAAAAAAATTTACTTA------AACTC-------------------TTGTCTTATCCGGATAAGACAAGAGTTTAAGTAAAAAATAATTCAGAA
Ammochloa_palestina					C-AAAGTATAAAATATATACGGA------------AAAGGAAAAAAAAATT--T------AATTC-------------------TTGTCTTATCCGGATTAGATAAGAATTTA-------------------
Alopecurus_arundinaceus					CGAAAGTTTAAAATATAT-----------------ACGAAAAAAAAATTTAAAAATTCT--------------------------TGTCTTATCCGGATTAGACAA-AATTTAAGTAAAAAATAACTCAGAA
Poa_palustris					C-AAAGTATAAAATATAT-----------------ACATAAAAAAATTTTTAAAATTCTTGTCTT-------------------ATGTCTTATCCGGATTAGACAA-AATTTAAGTAAAAAATAATTCAGAA
Festuca_ovina_NC_019649					C-AAAGTATAAAATATATATATATACATAAAATATATGGAAAAAAATTTACTTA------AACTC-------------------TTGTCTTATCCGGATAAGACAAGAGTTTAAGTAAAAAATAATTCAGAA
Festuca_altissima					C-AAAGTATAAAATATAT-----------------ACGGAAAAAAATTTACTGA------AATTC-------------------TTGTCTTATCCGGATAAGACAAGAATTTCAGTAAAAAATAATTCAGAA
Festuca_arundinacea					C-AAAGTATAAAATATAT-----------------ACGGAAAAAAATTTACTGA------AATTC-------------------TTGTCTTATCCAGATAAGACAAGAATTTCAGTAAAAAATAATTCAGAA
Festuca_pratensis					C-AAAGTATAAAATATAT-----------------ACGGAAAAAAATTTACTTA------AATTCTTGTCTTATCCAGATAAGATTGTCTTATCCAGATAAGACAAGAATTTAAGTAAAAAATAATTCAGAA
Lolium_multiflorum					C-AAAGTATAAAATATAT-----------------ACGGAAAAAAATTTACTTA------AATTC-------------------TTGTCTTATCTGGATAAGACAAGAATTTAAGTAAAAAATAATTCAGAA
Lolium_perenne		109 (Deletion)	113042	113150	C-A-------------------------------------------------------------------------------------------------------------AAGTAAAAAATAATTCAGAA
Deschampsia_antarctica		69 (Deletion)	113089	113157	C-AAAGTATAAAATATAT-----------------AGTGAAAAAATTTTT---------------------------------------------------------------------AAAAAATTCAGAA
Puccinellia_nuttalliana					C-AAAGTATAAAATATAT-----------------ACAGAAATTTTTTTACTTA------------------------------AATTCTTATCCGGATAAG-----AATTTAAGTAAAAAATAATTCAGAA
Dactylis_glomerata					C-AAAGTATAAAAAATATACGGA------------AAAGGAAAATTTTTTTAAA------AATTC-------------------TTGTCTTATCCGGATTAGATAAGAATTTAAGTAAAAAATAATTCAGAA
Kengyilia_melanthera					-AAAAGTCTAAAATATATAC--------ATAAAAAATGTTAAAAAATTC-----------------------------------TTGTCTTATCCGCATTAGACAAAA--TGAAGTAAAAAATAATTCAAAA
Helictochloa_hookeri					C-AAAGTATAAAATATAT------------TATATACGGGAAAAA--------------------------------------------------------------AAATGAAGTAAAAAATACTTCAGAA
Lamarckia_aurea	49				TCCAATTATTTAATATGAATAATT-TTA--------------------TTAATTAATTAATGTACTTTTATGTGTCGAATTACTCAACACAATATTCCGAATTACTCAACACAATATTCCGAATTACTCAACACAATATTC----TTAGAACAAACCCCTCTGATATCTGCTAT-ATGGAATAAAAGTTTTGGTATACTGTGTG------------------CTAAGTATTCT-----------TGATCAATAAACTTTTCA--------TAA
Ventenata_macra					TCCAATTATTTAATATGAATAATTTGG--------------------ATTAATTAATTAATGTACTTTTATGTCTCGAATTACTCAA--------------------------------------------CACAATATTC----TTAGAGCAAACCCCTCTAATATCTGCTAT-ATGGAATAAAAGTTTTGGTATACTGTGTG------------------CTAAGTATTCTTTTTCTATCAATGATCAATGAACTTTTCA--------TAA
Scolochloa_festuaceae					TCCAATTATTTAATATGAATAATTTGGA--------------------TTAATTAATTAATGTACTTTTATGTGTCGAATTACTCAA--------------------------------------------CACAATATTC----TTAGAACAAACCCCTCTGATATCTGCTAT-ATGGAATAAAAGTTTTGGTATACTGTGTG------------------CTAAGTATTCT-----------TGATCAATAAACTTTTCA--------TAA
Nephelochloa_orientalis					TCCAATTATTTAATATGAATAATTTGG--------------------ATTAATTAATTAATGTACTTTTATGTCTCGAATTACTCAA--------------------------------------------CACAATATTC----TTAGAACAAACCCCTCTGATATCTGCTAT-ATGGAATAAAAGTTTTGGTATACTGTGTG------------------CTAAGTATTCTTTTTCTATCAATGATCAATGAACTTTTCA--------TAA
Holcus_lanatus					TCCAATTATTTAATATGAATAATTTGGA--------------------TTAATTAATTAATGTACTTTTATGTGTGGAATTACTCAA--------------------------------------------CACAATATCC----TTAGAACAAACCCCTCTGATATCTGCTAT-ATGGAATAAAAGTTTTGATATACTGTGTG------------------CTAAGTATTCT-----------TGATCAATAAACTTTTCA--------TAA
Poa_subgen_Stenopoa					TCCAATTATTTAATATGAATAATTTGG--------------------ATTAATTAATTAATGTACTTTTATGTGTCGAATTACTCAA--------------------------------------------CACAATATTC----TTAGAACAAACCCCTCTGATATCTGCTAT-ATGGAATAAAAGTTTTGGTATACTGTGTG------------------CTAAGTATTCTTTTCCTATCAATGATTAATGAACTTTTCA--------TAA
Festuca_ovina		267 (Deletion)	113550	113816	TCC---------------------------------------------------------------------------------------------------------------------------------------------------------------------------------------------------------------------------------------------------------------------------TAA
Desmazeria_sicula					TCCAATTATTTAATATGAATAATTTGGA--------------------TTAATTAATTAATGTACTTTTATGTGTCGAATTACTCAA--------------------------------------------CACAATATTC----TTAGAACAAACCCCTCTGATATCTACTAT-ATGGAATAAAAGTTTTGGTATACTGTGTG------------------CTAAGTATTTATTCT-------TGATCAATAAACTTTTCA--------CAA
Catapodium_rigidum					TCCAATTATTTAATATGAATAATTTGGA--------------------TTAATTAATTAATGTACTTTTATGTGTCGAATTACTCAA--------------------------------------------CACAATATTTATTATTAGAACAAACCCCTCTGATATCTACTATAATGGAATAAAAGTTTTGGTATACTGTGTGCTAAGTATTTATTCTTGACTAAGTATTTATTCT-------TGATCAATAAACTTTTCA--------TAA
Catapodium_marinum					TCCAATTATTTAATATGAATAATTTGGA--------------------TTAATTAATTAATGTACTTTTATGTGTCGAATTACTCAA--------------------------------------------CACAATATTTATTATTAGAACAAACCCCTCTGATATCTACTATAATGGAATAAAAGTTTTGGTATACTGTGTGCTAAGTATTTATTCTTGACTAAGTATTTATTCT-------TGATCAATAAACTTTTCA--------TAA
Castellia_tuberculosa		267 (Deletion)	113550	113816	TCC---------------------------------------------------------------------------------------------------------------------------------------------------------------------------------------------------------------------------------------------------------------------------TAA
Ammochloa_palestina					TTCAATTATTTAATATGAATAATTGAAA--------------------TTAATTAATTAATGTACTTTTATGTGTTGAATTACTCAA--------------------------------------------CACAATATTC----TTAGAACAAACCCCTCTGATACCCGCTAT-ATGGAATAAAAGTTTTTGTATACTGTGTG------------------CTAAGTATTCT-----------TGATCAATAAATTTTTCA--------TAA
Alopecurus_arundinaceus					TTCAATTATTTAATATGAATAATTTAG--------------------ATTAATTAATTAATGTACTTTTATGTGTCGAATTACTCAA--------------------------------------------CACAATATTC----TTAGAACAAACCCCTCTAATATCTGCTAT-ATGGAAAAAAAGTTTTGGTATACTGTGTG------------------CTAAGTATTCTTTTTCTATCAATGATCAATGAACTTTTCA--------TAA
Poa_palustris					TCTAATTATTTAATATGAATAATTTGGA----------------TTAATTAATTAATTAATGTACTTTTATGTGTCGAATTACTCAA--------------------------------------------CACAATATTC----TTAGAACAAACCCCTCTGATATCTGCTAT-ATGGAATAAAAGTTTTGGTATACTGTGTG------------------CTAAGTATTCTTTTCCTATCAATGATTAATGAACTTTTCA--------TAA
Festuca_ovina_NC_019649		267 (Deletion)	113550	113816	TCC---------------------------------------------------------------------------------------------------------------------------------------------------------------------------------------------------------------------------------------------------------------------------TAA
Festuca_altissima					TCCAATTATTTAATATGAATAATTTGGA----------------TTAATTAATTAATTAATGTACTTTTATGTGTCGAATTACTCAA--------------------------------------------CACAATATTC----TTAGAACAAACCCCTCCTATATCCGCTAT-ATGGAATAAAAGTTTTGGTATACTGTGTG------------------CTAAGTATTCT-----------TGATCAATAAACTTTTCA--------TAA
Festuca_arundinacea					TCCAATTATTTAATATGAATAATTTGGA------------TTAATTAATTAATTAATTAATGTACTTTTATGTGTCGAATTACTCAA--------------------------------------------CACAAGATTC----TTAGAACAAACCCCTCCTATATCCGCTAT-ATGGAATAAAAGTTTTGGTATACTGTGTG------------------CTAAGTATTCT-----------TGATCAATAAACTTTTCCTATTTTTATAA
Festuca_pratensis					TCCAATTATTTAATATGAATAATTTGGA--------------------TTAATTAATTAATGTACTTTTATGTGTCGAATTACTCAA--------------------------------------------CACAAGATTC----TTAGAACAAACCCCTCCTATATCCGCTAT-ATGGAATAAAAGTTTTGGTATACTGTGTG------------------CTAAGTATTCT-----------TGATCAATAAACTTTTCC--------TAA
Lolium_multiflorum					TCCAATTATTTAATATGAATAATTTGGA------------TTAATTAATTAATTAATTAATGTACTTTTATGTGTCGAATTACTCAA--------------------------------------------CACAAGATTC----TTAGAACAAACCCCTCCTATATCCGCTAT-ATGGAATAAAAGTTTTGGTATACTGTGTG------------------CTAAGTATTCT-----------TGATCAATAAACTTTTCC--------TAA
Lolium_perenne					TCCAATTATTTAATATGAATAATTTGGA------------TTAATTAATTAATTAATTAATGTACTTTTATGTGTCGAATTACTCAA--------------------------------------------CACAAGATTC----TTAGAACAAACCCCTCCTATATCCGCTAT-ATGGAATAAAAGTTTTGGTATACTGTGTG------------------CTAAGTATTCT-----------TGATCAATAAACTTTTCC--------TAA
Deschampsia_antarctica					TCCAATTATTTAATATGAATAATTTTTAATATGAATAATTTTGATTCTTTAATTAATTAATGTATTTTTATGTGTTGAATTACTCAA--------------------------------------------CACAATATTC----TTAGAACAAACCCCTCTGATATCTGCTAT-ATGGAATAAAAGTTTTGGTATACTGTGTG------------------CTAAGTATTCT-----------TGATCAATAAACTTTTCA--------TAA
Puccinellia_nuttalliana					TCCAATTATTTAATATGAATAATTTGGA----------------TTAATGAATTAATTAATGTACTTTTATGTGTCGAATTACTCAA--------------------------------------------CACAATATTC----TTAGAACAAACCCCTCTGATATCTGCTAT-ATGGAATAAAAGTTTTGGTATACTATGTG------------------CTAAGTATTCTTTTCCTATCAATGATCAATGAACTTTTCA--------TAA
Dactylis_glomerata					TCCAATTATTTAATATGAATAATT-TTA--------------------TTAATTAATTAATGTACTTTTATGTGTCGAATTACTCAA--------------------------------------------CACAATATTC----TTAGAACAAACCCCTCTGATATCTGCTAT-ATGGAATAAAAGTTTTGGTATACTGTGTG------------------CTAAGTATTCT-----------TGATCAATAAACTTTTCA--------TAA
Kengyilia_melanthera					TCCAATTATTT----------------------AATAATT----TTGATTCTTCTTTGAATGCACTTTTATGTGTCGAATTACTCGGTACAATATTC------------------------------------------------TTAGAACAAACCCCTCTTATA-----TATACAAGAAAAAAAAAGTTTTGTTTGGTATACTGTGTG------------------CTAAGTATTCTTTTCCTATCAATG-------AACTTTTCATAATTTTCATAA
Helictochloa_hookeri					TCAAATTATTCATATTAAATAATTTG--------------------AATTAATTAATTAATGTACTTTTATGTGTCGAATTACTCAACACAACATTC------------------------------------------------TTAGAACAAACCCCTCTGATATCCGCTATATGGAATAAAAAAAGT----TTTGGTATACTGTGTGCTAAGTATTC-----------------------------TTGATCAATAAACTTTTC---------ATAA
Lamarckia_aurea	50				CAATAGGACTTACCACTTCCATCTATTTTTTCCAAAATCATT-------------------------------------------
Ventenata_macra					CAATAGGACTTACCACTTCCATCTATTTTCTCTAAAATTAGTGGTTTAA--------------------GGTTAGTAAATCCTAT
Scolochloa_festuaceae					CAATAGGACTTACCACTTCCATCTATTTTCTCCAAAATCATTGGTTTAA--------------------GGTTAGTAAATCCTAT
Nephelochloa_orientalis					CAATAGGACTTACCACTTCCATCTATTTTCTCTAAAATAAGTGGTTTAA--------------------GGTTACTAAATCCTAT
Holcus_lanatus					CAATAGGACTTACCACTTCCATCTATTTTCTCCAAAATCATTGGTTTAA--------------------TGTTAGTAAATCCTAT
Poa_subgen_Stenopoa					CAATAGGACTTACCACTTCCATCTATTTTCTCCAAAATAAGTGGTTTAA--------------------GGTTAGTAAATCCTAT
Festuca_ovina					CAATAGGACTTCCCACTTCCATCTATTTTCTCCAAAATCATTGGCTTAA--------------------GGTTAGTAAATCCTAT
Desmazeria_sicula					CAATAGCACTTACCACTTCCATCTATTTTCTCCAAAATAATTGGTTTAA-----GGTGATTAAGTTTAAGGGGATTAAATCCTAT
Catapodium_rigidum					CAATAGCACTTACCACTTCCATCTATTTTCTCCAAAATAATTGGTTTAAGGTGCGGTGATTAAGTTTAAGGGGATTAAATCCTAT
Catapodium_marinum					CAATAGCACTTACCACTTCCATCTATTTTCTCCAAAATAATTGGTTTAAGGTGCGGTGATTAAGTTTAAGGGGATTAAATCCTAT
Castellia_tuberculosa					CAATAGGACTTACCACTTCCATCTATTTTCTCCAAAATCATTGGCTTAA--------------------GGTTAGTAAATCCTAT
Ammochloa_palestina					CAATAGGACTTACCACTTCCATCTATTTTCTCCAAAATCATTGATTTAA--------------------GGTTAGTAAATCCTAT
Alopecurus_arundinaceus					CAATAGGATTTACCACTTCCATCTATTTTCTCCAAAATAAGTGGTTTAA--------------------GGTTAGGAAATTCTAT
Poa_palustris					CAATAGGACTTACCACTTCCATCTATTTTCTCCAAAATAAGTGGTTTAA--------------------CGTTAGTAAATCCTAT
Festuca_ovina_NC_019649					CAATAGGACTTCCCACTTCCATCTATTTTCTCCAAAATCATTGGCTTAA--------------------GGTTAGTAAATCCTAT
Festuca_altissima					CAATAAAACTTACCACTTCCATCTATTTTCTCCAAAATCATTGGTTTAA--------------------GGTTAGTAAATCCTAT
Festuca_arundinacea					CAATAAAACTTACCACTTACATCTATTTTCTCCAAAATCATTGGTTTAA--------------------GGTTAGTAAATCCTAT
Festuca_pratensis					CAATAAAACTTACCACTTACATCTATTTTCTCCAAAATAATTGGTTTAA--------------------GGTTAGTAAATCCTAT
Lolium_multiflorum					CAATAAAACTTACCACTTACATCTATTTTTTCCAAAATAATTGGTTTAA--------------------GGTTAGTAAATCCTAT
Lolium_perenne					CAATAAAACTTACCACTTACATCTATTTTCTCCAAAATAATTGGTTTAA--------------------GGTTAGTAAATCCTAT
Deschampsia_antarctica		79 (Deletion)	113913	113991	TAA-------------------------------------------------------------------------------TAT
Puccinellia_nuttalliana					CAATAGGACTTACCACTTCCATCCATTTTTTCCAAAATCATT---------------------------------TGAATTTCAT
Dactylis_glomerata					CAATAGGACTTACCACTTCCATCTATTTTTTCCAAAATCATTGGTTTAA--------------------GGTTAGTAAATCCTAT
Kengyilia_melanthera					CAATAGGACTTACAACTTCCCCCTATCTTATCCAAAATCA--------------------------TAAGGTTAGTAAATCTTAT
Helictochloa_hookeri					TAATAGGACTTACCACTTCCATCTATTTTCTCCAAAATCA-------------------------TTAAGGTTAGTAAATCCTAT
Lamarckia_aurea	51	101 (Deletion)	113952	114052	ATT-----------------------------------------------------------------------------------------------------ATC
Ventenata_macra					AGTGGTTTAA--------------------GGTTAGTAAATCCTATTAAT----AAGAGCATAAAGACTTTCATTCTATACTA------TAAATTTTTA-AAAAATC
Scolochloa_festuaceae					ATTGGTTTAA--------------------GGTTAGTAAATCCTATTAAT----AAGAGCATAAAGACTTTCATTCTAT------------AAATTTTTCAACAATC
Nephelochloa_orientalis					AGTGGTTTAA--------------------GGTTACTAAATCCTATTAAT----AAGAGCATAAAGAGTTTCATTCTATACTA------TAAATTTTTTAAAAAATC
Holcus_lanatus					ATTGGTTTAA--------------------TGTTAGTAAATCCTATTAAT----AAGAGCATAAAGACTTTCATTCTAT------------AAATTTTTCAAAAATC
Poa_subgen_Stenopoa					AGTGGTTTAA--------------------GGTTAGTAAATCCTATTAAT----AAGAGCATAAAGACTTTCATTCTATACTAAAAATTTAAAATTTTTAAAAAATC
Festuca_ovina					ATTGGCTTAA--------------------GGTTAGTAAATCCTATTAAT----AAGAACATAAAGACTTTCATTCTAT------------AA--------------
Desmazeria_sicula					ATTGGTTTAA-----GGTGATTAAGTTTAAGGGGATTAAATCCTATTAATAAGAAAGAGCATAAAGACTTTCATTCAAT-------------AAAATGTAAAAAATC
Catapodium_rigidum					ATTGGTTTAAGGTGCGGTGATTAAGTTTAAGGGGATTAAATCCTATTAAT----AAGAGCATAAAGACTTTCATTCAAT-------------AAAATGTA-------
Catapodium_marinum					ATTGGTTTAAGGTGCGGTGATTAAGTTTAAGGGGATTAAATCCTATTAAT----AAGAGCATAAAGACTTTCATTCAAT-------------AAAATGTA-------
Castellia_tuberculosa					ATTGGCTTAA--------------------GGTTAGTAAATCCTATTAAT----AAGAACATAAAGACTTTCATTCTAT------------AAATTTTTCAAAAATC
Ammochloa_palestina					ATTGATTTAA--------------------GGTTAGTAAATCCTATTAAT----AAGAGCATAAAGAGTTTCTTTCATT---------CACTAAAATGGACAAAATC
Alopecurus_arundinaceus					AGTGGTTTAA--------------------GGTTAGGAAATTCTATTAAT----AAGAGCATAAAGACTTTCATTCTATACTA------TAAATTTTTT-AAAAATC
Poa_palustris					AGTGGTTTAA--------------------CGTTAGTAAATCCTATTAAT----AAGAGCATAAAGACTTTCATTCTATACTAAAAATTTAAAATTTTTAAAAAATC
Festuca_ovina_NC_019649					ATTGGCTTAA--------------------GGTTAGTAAATCCTATTAAT----AAGAACATAAAGACTTTCATTCTAT------------AA--------------
Festuca_altissima					ATTGGTTTAA--------------------GGTTAGTAAATCCTATTAAT----AAGAGCATAAAGACTTTCATTCTAT------------AAA--T----------
Festuca_arundinacea					ATTGGTTTAA--------------------GGTTAGTAAATCCTATT---------GAGCATAAAGACTTTCATTCTAT------------AAA--T----------
Festuca_pratensis					ATTGGTTTAA--------------------GGTTAGTAAATCCTATTAAT----AAGAGCATAAAGACTTTCATTCTAT------------AAATTT----------
Lolium_multiflorum					ATTGGTTTAA--------------------GGTTAGTAAATCCTATTAAT----AAGAGCATAAAGACTTTCATTCTAT------------AAA-TT----------
Lolium_perenne					ATTGGTTTAA--------------------GGTTAGTAAATCCTATTAAT----AAGAGCATAAAGACTTTCATTCTTT------------AAA-TT----------
Deschampsia_antarctica					1------------------------------------------TATTAAT----AAGAGCATAAAGAATTTCATTCTAT------------AAATTTTTCAAAAATC
Puccinellia_nuttalliana					ATT---------------------------------TGAATTTCATCATT----AATA-------------------------------------------------
Dactylis_glomerata					ATTGGTTTAA--------------------GGTTAGTAAATCCTATTAAT----AAGAGCATAAAGAG----TTTCATT---------CAATAAAATGGACAAAATC
Kengyilia_melanthera					A--------------------------TAAGGTTAGTAAATCTTATTAAT----AAGAGCATAAAGACTTTCATTCTA------------GAAATTTGAAAAAAATCC
Helictochloa_hookeri					A-------------------------TTAAGGTTAGTAAATCCTATTAATAAGAA----CATAAAGACTTTCATTCTCT------------AAATTTTTCAAAAATTA
Lamarckia_aurea	52				-------------------------------------------------ATCCAAAAAGC-----TTTTTC---------------------------
Ventenata_macra					AGAGCATAAAGACTTTCATTCTATACTA------TAAATTTTTA-AAAAATCCAAAAAGCCTTTTCTATTTATCCATTTTCATTTCATCATTAAATAG
Scolochloa_festuaceae					AGAGCATAAAGACTTTCATTCTAT------------AAATTTTTCAACAATCCAAAAAGCCTTTTCTATTTATCCATTTTAATTTAATCATTAAATAG
Nephelochloa_orientalis					AGAGCATAAAGAGTTTCATTCTATACTA------TAAATTTTTTAAAAAATCCAAAAAGCCTTTTCTATTTATCCATTTTAATTTCATCATTAAATAG
Holcus_lanatus					AGAGCATAAAGACTTTCATTCTAT------------AAATTTTTCAAAAATCCAAAAAGCCTTTTCTATTTATCCATTTTAATTTAATCATTAAATAG
Poa_subgen_Stenopoa					AGAGCATAAAGACTTTCATTCTATACTAAAAATTTAAAATTTTTAAAAAATCCAAAAAGCCTTTTCTATTTATCCATTTTAATTTCATCATTAAATAG
Festuca_ovina					AGAACATAAAGACTTTCATTCTAT------------AA------------------------------------------------------------
Desmazeria_sicula					AGAGCATAAAGACTTTCATTCAAT-------------AAAATGTAAAAAATCCAAAAAGCCTTTTC--------------------------------
Catapodium_rigidum					AGAGCATAAAGACTTTCATTCAAT-------------AAAATGTA--------AAAAAGCCTTTTC--------------------------------
Catapodium_marinum					AGAGCATAAAGACTTTCATTCAAT-------------AAAATGTA--------AAAAAGCCTTTTC--------------------------------
Castellia_tuberculosa					AGAACATAAAGACTTTCATTCTAT------------AAATTTTTCAAAAATCCAAAAAGCCTTTTCTATTTATCCATTTTAATTTAATCATTAAATAG
Ammochloa_palestina					AGAGCATAAAGAGTTTCTTTCATT---------CACTAAAATGGACAAAATCCAAAAAGCCTTTTTTTTTC---------------------------
Alopecurus_arundinaceus					AGAGCATAAAGACTTTCATTCTATACTA------TAAATTTTTT-AAAAATCCAAAAAGCCTTTTCTATTTATCCATTTTAATTTCATCATTAAATAG
Poa_palustris					AGAGCATAAAGACTTTCATTCTATACTAAAAATTTAAAATTTTTAAAAAATCCAAAAAGCCTTTTCTATTTATCCATTTGAATTTCATCATTAAATAG
Festuca_ovina_NC_019649					AGAACATAAAGACTTTCATTCTAT------------AA------------------------------------------------------------
Festuca_altissima					AGAGCATAAAGACTTTCATTCTAT------------AAA--T--------------------------TTTTTCAATAAAATTTC-------------
Festuca_arundinacea					-GAGCATAAAGACTTTCATTCTAT------------AAA--T--------------------------TTTTTCCATTTTATTTTTATTG-AAAAAA-
Festuca_pratensis					AGAGCATAAAGACTTTCATTCTAT------------AAATTT--------------------------TTTTTCCATTTTATTTTGATTGAAAAAAA-
Lolium_multiflorum					AGAGCATAAAGACTTTCATTCTAT------------AAA-TT--------------------------TT-TTCCATTTTATTTTGATTG-AAAAAA-
Lolium_perenne					AGAGCATAAAGACTTTCATTCTTT------------AAA-TT--------------------------TTGTTCAATCAAAATAAAATGG-AAAAAA-
Deschampsia_antarctica					AGAGCATAAAGAATTTCATTCTAT------------AAATTTTTCAAAAATCAAAAAA-----------------GGTTTGTTTCGATTTATAGAAA-
Puccinellia_nuttalliana		92 (Deletion)	114007	114098	ATA--------------------------------------------------------------------------------------------TAG
Dactylis_glomerata					AGAGCATAAAGAG----TTTCATT---------CAATAAAATGGACAAAATCCAAAAAGC-----TTTTTC---------------------------
Kengyilia_melanthera					AGAGCATAAAGACTTTCATTCTA------------GAAATTTGAAAAAAATCCAAAAAGCCTTTTCTATTTATCCATTTTAATTTCATCATTAAATAG
Helictochloa_hookeri					----CATAAAGACTTTCATTCTCT------------AAATTTTTCAAAAATTACAAAAGCCTTTTCTATTTATCCATTTTAATTTAATCATTAAATAG
Lamarckia_aurea	53				1--------------------------------TATTTATCCATTTTAATGAAATAATTTATAA
Ventenata_macra					TTTCATCATTAAATAGAAACAAACCTTTTTGG-ATTTTATCCATTTTATTGAAATAATTTTCAA
Scolochloa_festuaceae					TTTAATCATTAAATAGAAACAAACCCTTTTTG-ATTTTGTCCATTTTATTGAAATAATTTCCAA
Nephelochloa_orientalis					TTTCATCATTAAATAGAAACAAACCTTTTTGG-ATTTTCTCCATTTTATTGAAATAATTTTCAA
Holcus_lanatus					TTTAATCATTAAATAGAAACAAACCTTTTTGG-ATTTTGTCGATTTTATTGAAATAATTTCCAA
Poa_subgen_Stenopoa					TTTCATCATTAAATAGAAACAAACCTTTTTGG-ATTTTGTCCATTTTATTGAAATAATTTTTAA
Festuca_ovina					1--------------------------------ATTTTGTCCATTTTATTG-AAAAATGGACAA
Desmazeria_sicula					1--------------------------------TATTTATCTATTTTAATGAAATAATTTCTAA
Catapodium_rigidum					1--------------------------------TATTTATCTATTTTAATGAAATAATTTCTAA
Catapodium_marinum					1--------------------------------TATTTATCTATTTTAATGAAATAATTTCTAA
Castellia_tuberculosa					TTTAATCATTAAATAGAAACAAACCCCTTTTTGATTTTGTCCATTTTATTGAAAAAATGGACAA
Ammochloa_palestina					1--------------------------------TATTTATCCATTTTAATGAAATAATTTTAAA
Alopecurus_arundinaceus					TTTCATCATTAAATAGAAACAAACC-TTTTGG-ATTTTCTCTATTTTATTGAAATAATTTTTTC
Poa_palustris					TTTCATCATTAAATAGAAACAAACCTTTTTTG-ATTTTGTCCATTTTATTGAAATAATTTTCAA
Festuca_ovina_NC_019649					1--------------------------------ATTTTGTCCATTTTATTGAAAAAATGGACAA
Festuca_altissima		58 (Deletion)	114089	114146	TTC----------------------------------------------------------CTA
Festuca_arundinacea					TTTTATTG-AAAAAA----------------------------------------------TGT
Festuca_pratensis					TTTGATTGAAAAAAA----------------------------------------------TGT
Lolium_multiflorum					TTTGATTG-AAAAAA----------------------------------------------TGT
Lolium_perenne					TAAAATGG-AAAAAA----------------------------------------------TTT
Deschampsia_antarctica					TTCGATTTATAGAAA------AGACTTTTTTG-ATTTTGTCCATTTTATTGAAATAATTTCCCA
Puccinellia_nuttalliana					1------------TAGAAACAAAACTTTTTGG-ATTTTGTCCATTTTATGGAAATAATTTTCAA
Dactylis_glomerata					1--------------------------------TATTTATCCATTTTAATGAAATAATTTATAA
Kengyilia_melanthera					TTTCATCATTAAATAGAAA-----CCCTTTTGGATTTTTTTCATTGTATTGAAAGAATTTTCAA
[truncated: 152 more rows]

## Sheet: G2 BINARY
Name	A2	B2	C2	D2	E2	F2	G2	H2	J2	K2	L2	M2	N2	P2	Q2	R2	S2	T2	U2	V2	W2	X2	Y2	Z2	AA2	BB2	CC2
[truncated: 25 more rows]

[truncated: 1 more sheets: Taxonomic Markers]
